# Supplementary material
Source: publisher figshare collection journal article supplement (https://gsajournals.figshare.com/ndownloader/files/23714948)
Supplement: Supplementary file 1 [file 23714948]

## Sheet: Table S1
Table S1: Estimated haploid genome length for S. viridis and S. italica.
Assessment of genome size of ten S. viridis and one S. italica cultivar(s) downloaded from the NCBI Sequence Read Archive.
Data were evaluated using GenomeScope for k-mer frequency analysis of raw data, quality-trimmed data, and following removal of organelle-derived sequences.
Cultivar	SRA Datasets	Raw data (Gbp)	Ave. Read Length	unique 21-mers	Genome Haploid Length	Trimmed data (Gbp)	Ave. Read Length	unique 21-mers	Genome Haploid Length	Trimmed + Filtered data (Gbp)	Ave. Read Length	unique 21-mers	Genome Haploid Length
S. italica Zhang gu	SRR424232 - 60, SRR438797 - 805	89911156552	62	520020308	439342115	78625091780	61	430611722	421314811	75088209166	60	425896882	399657377
S. viridis A10.1	SRR4125831 - 6	185022742200	150	789928057	442050835	163790016320	140	561705770	430279855	151760363464	139	557155535	398108962
S. viridis ME034	SRR1587768	30153219300	150	310724599	432098673	27858736571	146	297225688	425228914	25738332132	146	294548246	391875657
S. viridis ME042-1	SRR1587488	26215437300	150	315668651	431397313	23339026378	139	298980181	419124155	21996213317	139	295808376	394469809
S. viridis ME015	SRR1587582	26279398500	150	312467480	452795849	23543169052	142	297749714	441927865	21339872596	141	294536998	399420848
S. viridis ME025V	SRR1587603	30628205700	150	311800631	455526646	28282182641	143	296853080	449050200	26204659420	143	294731961	415255924
S. viridis ME028V	SRR1587617	16368806700	150	297365387	389910636	15468216276	146	292358758	382614533	14482839263	146	291972352	357687155
S. viridis ME043	SRR1587628	23623350300	150	311776655	465565899	21149164350	141	296914120	458584807	19479767660	141	294841887	421001828
S. viridis ME044	SRR1587638	26713319400	150	311948756	454917865	24251320521	142	296800375	448133641	22323710550	142	294456691	411307915
S. viridis ME048V	SRR1587646	23974266600	150	315905712	459916441	20945233832	139	298260873	450644581	19209068091	139	294885532	411765821
S. viridis ME052V	SRR1587653	26634490200	150	336496618	458757717	23390682374	140	316252896	450931685	21742169504	140	313192615	417948081

## Sheet: Table S2
Table S2: Sequencing library alignment rates.
Alignment rates of the genomic DNA (gDNA) library from ME034V against the ME034V 1.0 genome, as well as the uniquely mapped read rates for twelve RNA-Seq libraries
For each, the NCBI Short Read Archive submission ID is provided
Percentage of the final 37,908 gene models with expression support (>TPM 1) are also provided
Library	SRA Run ID	Library Type	Overall Alignment	Percentage of Final Gene Models with Support
ME034V gDNA	SRR10873424	gDNA	0.9914	N/A
ME034V Rep #8 Leaf	SRR11450757	RNA-Seq	0.4346	0.3884
ME034V Rep #8 Root	SRR11450747	RNA-Seq	0.6023	0.4649
ME034V Rep #8 Shoot	SRR11450751	RNA-Seq	0.5315	0.4729
ME034V Rep #9 Leaf	SRR11450756	RNA-Seq	0.4688	0.4061
ME034V Rep #9 Root	SRR11450746	RNA-Seq	0.554	0.4182
ME034V Rep #9 Shoot	SRR11450750	RNA-Seq	0.3982	0.4611
ME034V Rep #10 Leaf	SRR11450753	RNA-Seq	0.3873	0.4228
ME034V Rep #10 Root	SRR11450755	RNA-Seq	0.4595	0.426
ME034V Rep #10 Shoot	SRR11450749	RNA-Seq	0.3717	0.4457
ME034V Rep #11 Leaf	SRR11450752	RNA-Seq	0.0961	0.0506
ME034V Rep #11 Root	SRR11450754	RNA-Seq	0.4863	0.3905
ME034V Rep #11 Shoot	SRR11450748	RNA-Seq	0.5352	0.4775

## Sheet: Table S3
Table S3: List of whole genome sequencing libraries downloaded from the NCBI SRA.
Run IDs are the same as those used in the structural variant analysis (Table S6)
Cultivar information, if available, is provided along with the alignment rates to the three available Setaria reference genomes
(Setaria viridis ME034V v1.0, Setaria viridis A10.1 v2.1 and Setaria italica v2.1)
Run ID	Assembly with Best Alignment Rate	Alignment Rate to ME034V v1.0	Alignment Rate to A10 v2.1	Alignment Rate to Setaria italica v2	Assay	BioSample	Center	Consent	Experiment	Instrument	LibraryLayout	LibrarySelection	LibrarySource	Organism	Platform	ReleaseDate	Sample Name	SRA Study	AvgSpotLenBases	Bytes	BioProject	Library Name	Cultivar (if provided)	Alias
ERR2696316	Setaria italica	0.9884	0.9874	0.9974	WGS	SAMEA4786356	CHINESE ACADEMY OF AGRICULTURAL SCIENCES	public	ERX2710709	Illumina HiSeq 2500	PAIRED	RANDOM	GENOMIC	Setaria italica	ILLUMINA	2018-09-11T00:00:00Z	SAMEA4786356	ERP109842	19753317600	6398697410	PRJEB27720	unspecified	yugu1	ERS2606292
ERR2696317	Setaria italica	0.9888	0.9859	0.9971	WGS	SAMEA4786357	CHINESE ACADEMY OF AGRICULTURAL SCIENCES	public	ERX2710710	Illumina HiSeq 2500	PAIRED	RANDOM	GENOMIC	Setaria italica	ILLUMINA	2018-09-11T00:00:00Z	SAMEA4786357	ERP109842	20438829600	6669325719	PRJEB27720	unspecified	sistl1	ERS2606293
SRR1587367	ME034	0.9881	0.9877	0.9855	WGS	SAMN02821723	JGI	public	SRX711640	Illumina HiSeq 2500	PAIRED	RANDOM	GENOMIC	Setaria viridis	ILLUMINA	2014-09-27T00:00:00Z	1025121	SRP047569	31509180300	21864643815	PRJNA251015	OBXH
SRR1587381	Setaria italica	0.9837	0.9816	0.9873	WGS	SAMN02822364	JGI	public	SRX711654	Illumina HiSeq 2500	PAIRED	RANDOM	GENOMIC	Setaria viridis	ILLUMINA	2014-09-27T00:00:00Z	1025124	SRP047583	24984535200	17337782380	PRJNA251025	OBXN
SRR1587409	Setaria italica	0.9835	0.9827	0.9851	WGS	SAMN02821510	JGI	public	SRX711682	Illumina HiSeq 2500	PAIRED	RANDOM	GENOMIC	Setaria viridis	ILLUMINA	2014-09-27T00:00:00Z	1025127	SRP047593	24304643100	16564417005	PRJNA251019	OBXO
SRR1587467	Setaria italica	0.9838	0.9804	0.986	WGS	SAMN02821885	JGI	public	SRX711740	Illumina HiSeq 2500	PAIRED	RANDOM	GENOMIC	Setaria viridis	ILLUMINA	2014-09-27T00:00:00Z	1025133	SRP047625	25389412500	17269967819	PRJNA251022	OBXS
SRR1587579	Setaria italica	0.9821	0.9809	0.9845	WGS	SAMN02821505	JGI	public	SRX711852	Illumina HiSeq 2000	PAIRED	RANDOM	GENOMIC	Setaria viridis	ILLUMINA	2014-09-27T00:00:00Z	1026756	SRP047652	27887640900	19107046800	PRJNA250043	UAWY
SRR1587581	Setaria italica	0.9864	0.9857	0.9885	WGS	SAMN02822288	JGI	public	SRX711854	Illumina HiSeq 2000	PAIRED	RANDOM	GENOMIC	Setaria viridis	ILLUMINA	2014-09-27T00:00:00Z	1025145	SRP004292	37557558000	24807010258	PRJNA251023	OBXX
SRR1587590	Setaria italica	0.986	0.984	0.9882	WGS	SAMN02821569	JGI	public	SRX711863	Illumina HiSeq 2000	PAIRED	RANDOM	GENOMIC	Setaria viridis	ILLUMINA	2014-09-27T00:00:00Z	1025151	SRP047658	20490135600	13463284169	PRJNA251032	TCTG
SRR1588023	Setaria italica	0.9423	0.9426	0.9576	WGS	SAMN02821752	JGI	public	SRX712290	Illumina HiSeq 2500	PAIRED	RANDOM	GENOMIC	Setaria italica	ILLUMINA	2014-09-27T00:00:00Z	1026921	SRP047950	32759151800	20879919541	PRJNA250210	NTNP
SRR1588025	Setaria italica	0.9816	0.9784	0.9911	WGS	SAMN02821978	JGI	public	SRX712292	Illumina HiSeq 2000	PAIRED	RANDOM	GENOMIC	Setaria italica	ILLUMINA	2014-09-27T00:00:00Z	1026924	SRP047952	27780445800	17688647773	PRJNA250219	NTNS
SRR1588052	Setaria italica	0.9829	0.9811	0.993	WGS	SAMN02821944	JGI	public	SRX712319	Illumina HiSeq 2000	PAIRED	RANDOM	GENOMIC	Setaria italica	ILLUMINA	2014-09-27T00:00:00Z	1026927	SRP047956	22299053100	14375040580	PRJNA250212	NTNT
SRR1588054	Setaria italica	0.9271	0.9238	0.9393	WGS	SAMN02821470	JGI	public	SRX712321	Illumina HiSeq 2500	PAIRED	RANDOM	GENOMIC	Setaria italica	ILLUMINA	2014-09-27T00:00:00Z	1026930	SRP047958	3337452000	1958198466	PRJNA250211	NTNU
SRR1588055	Setaria italica	0.9614	0.9605	0.9715	WGS	SAMN02821470	JGI	public	SRX712322	Illumina HiSeq 2000	PAIRED	RANDOM	GENOMIC	Setaria italica	ILLUMINA	2014-09-27T00:00:00Z	1026930	SRP047958	22750392600	14573718148	PRJNA250211	NTNU
SRR1588058	Setaria italica	0.9706	0.9703	0.9808	WGS	SAMN02822229	JGI	public	SRX712325	Illumina HiSeq 2000	PAIRED	RANDOM	GENOMIC	Setaria italica	ILLUMINA	2014-09-27T00:00:00Z	1026933	SRP047961	24836328300	15985716301	PRJNA250218	NTNW
SRR1588059	Setaria italica	0.8959	0.8932	0.9081	WGS	SAMN02822229	JGI	public	SRX712326	Illumina HiSeq 2500	PAIRED	RANDOM	GENOMIC	Setaria italica	ILLUMINA	2014-09-27T00:00:00Z	1026933	SRP047961	4005069200	2339175945	PRJNA250218	NTNW
SRR1588060	Setaria italica	0.9847	0.9812	0.9934	WGS	SAMN02821369	JGI	public	SRX712327	Illumina HiSeq 2000	PAIRED	RANDOM	GENOMIC	Setaria italica	ILLUMINA	2014-09-27T00:00:00Z	1026939	SRP047962	21336534600	13590676223	PRJNA250216	NTNY
SRR1588062	Setaria italica	0.9826	0.9763	0.9907	WGS	SAMN02821368	JGI	public	SRX712329	Illumina HiSeq 2000	PAIRED	RANDOM	GENOMIC	Setaria italica	ILLUMINA	2014-09-27T00:00:00Z	1026942	SRP047964	23754642300	15290071791	PRJNA250214	NTNZ
SRR1588064	Setaria italica	0.9645	0.9634	0.965	WGS	SAMN02822338	JGI	public	SRX712331	Illumina HiSeq 2000	PAIRED	RANDOM	GENOMIC	Setaria italica	ILLUMINA	2014-09-27T00:00:00Z	1026945	SRP047966	26124029700	16954358263	PRJNA250224	NTOA
SRR1588065	ME034	0.9686	0.9629	0.9684	WGS	SAMN02822338	JGI	public	SRX712332	Illumina HiSeq 2500	PAIRED	RANDOM	GENOMIC	Setaria italica	ILLUMINA	2014-09-27T00:00:00Z	1026945	SRP047966	3515946200	2038369423	PRJNA250224	NTOA
SRR1801382	Setaria italica	0.9158	0.9158	0.9259	WGS	SAMN02821780	JGI	public	SRX875345	Illumina HiSeq 2000	PAIRED	RANDOM	GENOMIC	Setaria italica	ILLUMINA	2015-02-20T00:00:00Z	1026936	SRP054877	21224914200	13562248659	PRJNA250215	NTNX
SRR1801383	Setaria italica	0.6803	0.6752	0.691	WGS	SAMN02821780	JGI	public	SRX875346	Illumina HiSeq 2500	PAIRED	RANDOM	GENOMIC	Setaria italica	ILLUMINA	2015-03-19T00:00:00Z	1026936	SRP054877	3976033600	2220112645	PRJNA250215	NTNX
SRR3990240	ME034	0.9828	0.9786	0.9804	WGS	SAMN05446309	JGI	public	SRX1991887	Illumina HiSeq 2000	PAIRED	RANDOM	GENOMIC	Setaria viridis	ILLUMINA	2016-07-31T00:00:00Z	Gp0114266	SRP080672	23262220800	14573617208	PRJNA333306	TWUZ	#926
SRR3990309	Setaria italica	0.9747	0.9708	0.9755	WGS	SAMN05446323	JGI	public	SRX1991956	Illumina HiSeq 2000	PAIRED	RANDOM	GENOMIC	Setaria viridis	ILLUMINA	2016-07-31T00:00:00Z	Gp0114285	SRP080691	22733525400	15324854334	PRJNA334434	TWWA	EU-1
SRR3990318	A10	0.9826	0.9852	0.98	WGS	SAMN05446325	JGI	public	SRX1991965	Illumina HiSeq 2000	PAIRED	RANDOM	GENOMIC	Setaria viridis	ILLUMINA	2016-07-31T00:00:00Z	Gp0114288	SRP080700	27702954300	18160942476	PRJNA334437	TOTG	FN.00505
SRR3990319	ME034	0.9888	0.9885	0.9857	WGS	SAMN05446326	JGI	public	SRX1991966	Illumina HiSeq 2000	PAIRED	RANDOM	GENOMIC	Setaria viridis	ILLUMINA	2016-07-31T00:00:00Z	Gp0114289	SRP080699	23927183700	14568475481	PRJNA334438	TOTC	FN.00516
SRR3990392	A10	0.9811	0.9858	0.9787	WGS	SAMN05446324	JGI	public	SRX1992032	Illumina HiSeq 2000	PAIRED	RANDOM	GENOMIC	Setaria viridis	ILLUMINA	2016-07-31T00:00:00Z	Gp0114286	SRP080706	24924177300	16298808905	PRJNA334435	TOTH	FN.00474
SRR3990393	A10	0.9861	0.9882	0.9833	WGS	SAMN05442801	JGI	public	SRX1992033	Illumina HiSeq 2000	PAIRED	RANDOM	GENOMIC	Setaria viridis	ILLUMINA	2016-07-31T00:00:00Z	Gp0114287	SRP080707	23596072200	14982895373	PRJNA334436	TWWO	FN.00481
SRR4102359	ME034	0.8625	0.8623	0.8615	WGS	SAMN05442800	JGI	public	SRX2069489	Illumina HiSeq 2500	PAIRED	RANDOM	GENOMIC	Setaria viridis	ILLUMINA	2016-08-31T00:00:00Z	Gp0114290	SRP083829	15101078100	7354889995	PRJNA334439	XCAH	Huang_CO01_2
SRR4102391	ME034	0.9852	0.9837	0.9816	WGS	SAMN05446161	JGI	public	SRX2069511	Illumina HiSeq 2500	PAIRED	RANDOM	GENOMIC	Setaria viridis	ILLUMINA	2016-08-31T00:00:00Z	Gp0114291	SRP083832	15908901900	7798737710	PRJNA334440	XCAN	Huang_CO02_1
SRR4102479	ME034	0.9252	0.9248	0.9243	WGS	SAMN05446162	JGI	public	SRX2069521	Illumina HiSeq 2500	PAIRED	RANDOM	GENOMIC	Setaria viridis	ILLUMINA	2016-08-31T00:00:00Z	Gp0114292	SRP083834	16552096800	7322590728	PRJNA334441	XCAO	Huang_CO03_1
SRR4102489	ME034	0.883	0.8825	0.8829	WGS	SAMN05446165	JGI	public	SRX2069524	Illumina HiSeq 2500	PAIRED	RANDOM	GENOMIC	Setaria viridis	ILLUMINA	2016-08-31T00:00:00Z	Gp0114294	SRP083835	20270069700	10503362149	PRJNA334443	XCAS	Huang_CO05_3
SRR4102535	ME034	0.8803	0.8796	0.8792	WGS	SAMN05446166	JGI	public	SRX2069527	Illumina HiSeq 2500	PAIRED	RANDOM	GENOMIC	Setaria viridis	ILLUMINA	2016-08-31T00:00:00Z	Gp0114296	SRP083836	19280821500	9879373500	PRJNA334445	XCAU	Huang_CO08_3
SRR4102564	Setaria italica	0.9793	0.9787	0.9804	WGS	SAMN05446163	JGI	public	SRX2069530	Illumina HiSeq 2500	PAIRED	RANDOM	GENOMIC	Setaria viridis	ILLUMINA	2016-08-31T00:00:00Z	Gp0114293	SRP083838	19424289900	9510559990	PRJNA334442	XCAP	Huang_CO04_4
SRR4102567	Setaria italica	0.9839	0.9849	0.986	WGS	SAMN05446163	JGI	public	SRX2069532	Illumina HiSeq 2000	PAIRED	RANDOM	GENOMIC	Setaria viridis	ILLUMINA	2016-08-31T00:00:00Z	Gp0114293	SRP083838	14033866500	8645401638	PRJNA334442	XCAP	Huang_CO04_4
SRR4102574	ME034	0.979	0.9779	0.9784	WGS	SAMN05442781	JGI	public	SRX2069533	Illumina HiSeq 2500	PAIRED	RANDOM	GENOMIC	Setaria viridis	ILLUMINA	2016-08-31T00:00:00Z	Gp0114295	SRP083837	17815369500	7950906185	PRJNA334444	XCAT	Huang_CO06_3
SRR4103116	Setaria italica	0.9795	0.9787	0.9797	WGS	SAMN05446167	JGI	public	SRX2069586	Illumina HiSeq 2500	PAIRED	RANDOM	GENOMIC	Setaria viridis	ILLUMINA	2016-08-31T00:00:00Z	Gp0114297	SRP083841	15829518600	7976579282	PRJNA334446	XCAW	Huang_CO09_3
SRR4103137	ME034	0.8915	0.8908	0.8912	WGS	SAMN05446205	JGI	public	SRX2069589	Illumina HiSeq 2500	PAIRED	RANDOM	GENOMIC	Setaria viridis	ILLUMINA	2016-08-31T00:00:00Z	Gp0114299	SRP083842	19495270200	8681240159	PRJNA334448	XCAY	Huang_CO11_4
SRR4103219	Setaria italica	0.9817	0.9832	0.9833	WGS	SAMN05442779	JGI	public	SRX2069594	Illumina HiSeq 2500	PAIRED	RANDOM	GENOMIC	Setaria viridis	ILLUMINA	2016-08-31T00:00:00Z	Gp0114300	SRP083843	19016751900	9856152061	PRJNA334449	XCAZ	Huang_CO12_1
SRR4103260	ME034	0.877	0.8764	0.8766	WGS	SAMN05446168	JGI	public	SRX2069597	Illumina HiSeq 2500	PAIRED	RANDOM	GENOMIC	Setaria viridis	ILLUMINA	2016-08-31T00:00:00Z	Gp0114301	SRP083844	18174638700	8397719160	PRJNA334450	XCBA	Huang_KS03_2
SRR4103301	ME034	0.9213	0.9208	0.919	WGS	SAMN05442780	JGI	public	SRX2069600	Illumina HiSeq 2500	PAIRED	RANDOM	GENOMIC	Setaria viridis	ILLUMINA	2016-08-31T00:00:00Z	Gp0114298	SRP083845	21073906200	9320472531	PRJNA334447	XCAX	Huang_CO10_1
SRR4103302	A10	0.9109	0.9123	0.9103	WGS	SAMN05442780	JGI	public	SRX2069601	Illumina HiSeq 2000	PAIRED	RANDOM	GENOMIC	Setaria viridis	ILLUMINA	2016-08-31T00:00:00Z	Gp0114298	SRP083845	17008438500	10733076392	PRJNA334447	XCAX	Huang_CO10_1
SRR4103424	A10	0.9761	0.9762	0.9759	WGS	SAMN05446169	JGI	public	SRX2069608	Illumina HiSeq 2500	PAIRED	RANDOM	GENOMIC	Setaria viridis	ILLUMINA	2016-08-31T00:00:00Z	Gp0114302	SRP083846	17532468000	8232023248	PRJNA334451	XCBB	Huang_KS06_1
SRR4103485	ME034	0.8979	0.8969	0.8978	WGS	SAMN05446170	JGI	public	SRX2069612	Illumina HiSeq 2500	PAIRED	RANDOM	GENOMIC	Setaria viridis	ILLUMINA	2016-08-31T00:00:00Z	Gp0114304	SRP083847	14800916400	7179984496	PRJNA334453	XCBC	Huang_KS08_2
SRR4103804	Setaria italica	0.9801	0.9804	0.9821	WGS	SAMN05442778	JGI	public	SRX2069741	Illumina HiSeq 2500	PAIRED	RANDOM	GENOMIC	Setaria viridis	ILLUMINA	2016-08-31T00:00:00Z	Gp0114303	SRP083851	15531027600	6850984674	PRJNA334452	XCBG	Huang_KS07_4
SRR4103821	ME034	0.8677	0.867	0.8673	WGS	SAMN05446171	JGI	public	SRX2069743	Illumina HiSeq 2500	PAIRED	RANDOM	GENOMIC	Setaria viridis	ILLUMINA	2016-08-31T00:00:00Z	Gp0114305	SRP083852	19530677400	8755844653	PRJNA334454	XCBH	Huang_KS09_3
SRR4104007	Setaria italica	0.9809	0.9805	0.9817	WGS	SAMN05446172	JGI	public	SRX2069754	Illumina HiSeq 2500	PAIRED	RANDOM	GENOMIC	Setaria viridis	ILLUMINA	2016-08-31T00:00:00Z	Gp0114306	SRP083853	20337756000	10634311385	PRJNA334455	XCBN	Huang_KS11_3
SRR4104194	ME034	0.8899	0.8891	0.8897	WGS	SAMN05446173	JGI	public	SRX2069769	Illumina HiSeq 2500	PAIRED	RANDOM	GENOMIC	Setaria viridis	ILLUMINA	2016-08-31T00:00:00Z	Gp0114307	SRP083854	17667980400	7698646055	PRJNA334456	XCBO	Huang_KS13_4
SRR4104215	ME034	0.9801	0.9796	0.9789	WGS	SAMN05442777	JGI	public	SRX2069771	Illumina HiSeq 2500	PAIRED	RANDOM	GENOMIC	Setaria viridis	ILLUMINA	2016-08-31T00:00:00Z	Gp0114308	SRP083855	15708303000	6782863421	PRJNA334457	XCBP	Huang_KS16_3
SRR4104436	Setaria italica	0.9798	0.98	0.9811	WGS	SAMN05442776	JGI	public	SRX2069819	Illumina HiSeq 2500	PAIRED	RANDOM	GENOMIC	Setaria viridis	ILLUMINA	2016-08-31T00:00:00Z	Gp0114311	SRP083857	14917149900	6630561361	PRJNA334460	XCBT	Huang_MO06_6
SRR4104487	Setaria italica	0.922	0.9214	0.9233	WGS	SAMN05446174	JGI	public	SRX2069823	Illumina HiSeq 2500	PAIRED	RANDOM	GENOMIC	Setaria viridis	ILLUMINA	2016-08-31T00:00:00Z	Gp0114309	SRP083858	21106291200	10275577539	PRJNA334458	XCBS	Huang_MO01_1
SRR4104499	ME034	0.8678	0.8668	0.8675	WGS	SAMN05446177	JGI	public	SRX2069825	Illumina HiSeq 2500	PAIRED	RANDOM	GENOMIC	Setaria viridis	ILLUMINA	2016-08-31T00:00:00Z	Gp0114313	SRP083861	17790551100	8048013205	PRJNA334462	XCBW	Huang_MO11_5
SRR4104500	Setaria italica	0.9751	0.975	0.9752	WGS	SAMN05446176	JGI	public	SRX2069826	Illumina HiSeq 2500	PAIRED	RANDOM	GENOMIC	Setaria viridis	ILLUMINA	2016-08-31T00:00:00Z	Gp0114312	SRP083862	18861033300	8519065372	PRJNA334461	XCBU	Huang_MO11_2
SRR4104901	A10	0.9815	0.9839	0.9838	WGS	SAMN05446180	JGI	public	SRX2069883	Illumina HiSeq 2500	PAIRED	RANDOM	GENOMIC	Setaria viridis	ILLUMINA	2016-08-31T00:00:00Z	Gp0114314	SRP083864	22553573100	9925463917	PRJNA334463	XCBX	Huang_MO13_3
SRR4104962	Setaria italica	0.9572	0.956	0.9579	WGS	SAMN05446206	JGI	public	SRX2069887	Illumina HiSeq 2500	PAIRED	RANDOM	GENOMIC	Setaria viridis	ILLUMINA	2016-08-31T00:00:00Z	Gp0114316	SRP083866	18821211000	9114355064	PRJNA334465	XCBZ	Huang_MO17_2
SRR4105003	Setaria italica	0.9036	0.9031	0.9044	WGS	SAMN05446182	JGI	public	SRX2069890	Illumina HiSeq 2500	PAIRED	RANDOM	GENOMIC	Setaria viridis	ILLUMINA	2016-08-31T00:00:00Z	Gp0114318	SRP083867	17036980500	7466342888	PRJNA334467	XCCA	Huang_OK02_3
SRR4105004	ME034	0.9651	0.9636	0.9641	WGS	SAMN05446207	JGI	public	SRX2069891	Illumina HiSeq 2500	PAIRED	RANDOM	GENOMIC	Setaria viridis	ILLUMINA	2016-08-31T00:00:00Z	Gp0114317	SRP083868	19400923500	8858171755	PRJNA334466	XCCB	Huang_OK01_3
SRR4105005	ME034	0.8473	0.8469	0.8469	WGS	SAMN05446183	JGI	public	SRX2069894	Illumina HiSeq 2500	PAIRED	RANDOM	GENOMIC	Setaria viridis	ILLUMINA	2016-08-31T00:00:00Z	Gp0114319	SRP083869	17227800600	7967876341	PRJNA334468	XCCC	Huang_OK03_1
SRR4105030	Setaria italica	0.9048	0.9055	0.906	WGS	SAMN05446181	JGI	public	SRX2069905	Illumina HiSeq 2500	PAIRED	RANDOM	GENOMIC	Setaria viridis	ILLUMINA	2016-08-31T00:00:00Z	Gp0114315	SRP083870	24460454400	10934035239	PRJNA334464	XCBY	Huang_MO15_3
SRR4105097	Setaria italica	0.9823	0.9823	0.9845	WGS	SAMN05446184	JGI	public	SRX2069918	Illumina HiSeq 2500	PAIRED	RANDOM	GENOMIC	Setaria viridis	ILLUMINA	2016-08-31T00:00:00Z	Gp0114320	SRP083871	14992418400	6650100823	PRJNA334469	XCCG	Huang_OK04_2
SRR4105287	ME034	0.9068	0.9064	0.9065	WGS	SAMN05446186	JGI	public	SRX2070042	Illumina HiSeq 2500	PAIRED	RANDOM	GENOMIC	Setaria viridis	ILLUMINA	2016-08-31T00:00:00Z	Gp0114323	SRP083874	12670385400	5595199888	PRJNA334472	XCCO	Huang_TX02_1
SRR4105312	Setaria italica	0.9796	0.9795	0.9801	WGS	SAMN05446185	JGI	public	SRX2070044	Illumina HiSeq 2500	PAIRED	RANDOM	GENOMIC	Setaria viridis	ILLUMINA	2016-08-31T00:00:00Z	Gp0114322	SRP083875	17551383000	8223702792	PRJNA334471	XCCN	Huang_TX01_4
SRR4105333	ME034	0.8814	0.881	0.8813	WGS	SAMN05442775	JGI	public	SRX2070046	Illumina HiSeq 2500	PAIRED	RANDOM	GENOMIC	Setaria viridis	ILLUMINA	2016-08-31T00:00:00Z	Gp0114321	SRP083876	16918636200	7251223810	PRJNA334470	XCCH	Huang_OK08_2
SRR4105355	ME034	0.8702	0.8702	0.8696	WGS	SAMN05442774	JGI	public	SRX2070049	Illumina HiSeq 2500	PAIRED	RANDOM	GENOMIC	Setaria viridis	ILLUMINA	2016-08-31T00:00:00Z	Gp0114324	SRP083877	19482588300	9077835455	PRJNA334473	XCCP	Huang_TX04_4
SRR4105357	ME034	0.9799	0.9788	0.9795	WGS	SAMN05446187	JGI	public	SRX2070050	Illumina HiSeq 2500	PAIRED	RANDOM	GENOMIC	Setaria viridis	ILLUMINA	2016-08-31T00:00:00Z	Gp0114325	SRP083878	17170416900	7981145212	PRJNA332987	XCCS	Huang_TX06_1
SRR4105365	ME034	0.8743	0.8736	0.8734	WGS	SAMN05446188	JGI	public	SRX2070056	Illumina HiSeq 2500	PAIRED	RANDOM	GENOMIC	Setaria viridis	ILLUMINA	2016-08-31T00:00:00Z	Gp0114326	SRP083880	16234482000	7556592101	PRJNA332988	XCCT	Huang_TX07_1
SRR4105369	ME034	0.9779	0.9779	0.9777	WGS	SAMN05442773	JGI	public	SRX2070058	Illumina HiSeq 2500	PAIRED	RANDOM	GENOMIC	Setaria viridis	ILLUMINA	2016-08-31T00:00:00Z	Gp0114327	SRP083882	16134656400	7597943518	PRJNA332989	XCCU	Huang_TX08_2
SRR4105412	Setaria italica	0.8798	0.8798	0.8804	WGS	SAMN05446189	JGI	public	SRX2070062	Illumina HiSeq 2500	PAIRED	RANDOM	GENOMIC	Setaria viridis	ILLUMINA	2016-08-31T00:00:00Z	Gp0114328	SRP083883	21579075000	10601923641	PRJNA332990	XCCW	Huang_UT01_4
SRR4105413	ME034	0.8437	0.8434	0.8437	WGS	SAMN05446208	JGI	public	SRX2070063	Illumina HiSeq 2500	PAIRED	RANDOM	GENOMIC	Setaria viridis	ILLUMINA	2016-08-31T00:00:00Z	Gp0114330	SRP083884	17931185100	8104579423	PRJNA332992	XCCY	Huang_UT03_3
SRR4105414	Setaria italica	0.9783	0.9792	0.9797	WGS	SAMN05446190	JGI	public	SRX2070064	Illumina HiSeq 2500	PAIRED	RANDOM	GENOMIC	Setaria viridis	ILLUMINA	2016-08-31T00:00:00Z	Gp0114329	SRP083885	23348494500	12179863110	PRJNA332991	XCCX	Huang_UT02_4
SRR4105415	Setaria italica	0.9785	0.9799	0.9817	WGS	SAMN05446175	JGI	public	SRX2070065	Illumina HiSeq 2500	PAIRED	RANDOM	GENOMIC	Setaria viridis	ILLUMINA	2016-08-31T00:00:00Z	Gp0114310	SRP083886	21913353000	10407537604	PRJNA334459	XCCZ	Huang_MO03_2
SRR4105462	ME034	0.9793	0.9736	0.9775	WGS	SAMN05446311	JGI	public	SRX2070119	Illumina HiSeq 2500	PAIRED	RANDOM	GENOMIC	Setaria viridis	ILLUMINA	2016-08-31T00:00:00Z	Gp0114269	SRP083892	12036040500	5192569197	PRJNA333309	XCGB	Estep_ME013-3
SRR4105468	Setaria italica	0.9	0.8984	0.9007	WGS	SAMN05446310	JGI	public	SRX2070130	Illumina HiSeq 2500	PAIRED	RANDOM	GENOMIC	Setaria viridis	ILLUMINA	2016-08-31T00:00:00Z	Gp0114268	SRP083893	25519520100	13215979837	PRJNA333308	XCGA	Estep_ME012-1
SRR4105503	ME034	0.8029	0.7981	0.8003	WGS	SAMN05442805	JGI	public	SRX2070163	Illumina HiSeq 2500	PAIRED	RANDOM	GENOMIC	Setaria viridis	ILLUMINA	2016-08-31T00:00:00Z	Gp0114270	SRP083896	15611505000	7261329474	PRJNA333310	XCGC	Estep_ME014-1
SRR4116452	ME034	0.7277	0.7252	0.7275	WGS	SAMN05446204	JGI	public	SRX2095972	Illumina HiSeq 2500	PAIRED	RANDOM	GENOMIC	Setaria viridis	ILLUMINA	2016-09-01T00:00:00Z	Gp0114283	SRP083994	17772698400	8584771008	PRJNA334432	XTOB	Estep_ME073-1
SRR4116477	Setaria italica	0.9787	0.9726	0.9788	WGS	SAMN05442806	JGI	public	SRX2095997	Illumina HiSeq 2500	PAIRED	RANDOM	GENOMIC	Setaria viridis	ILLUMINA	2016-09-01T00:00:00Z	Gp0114267	SRP084005	9312983700	4113192135	PRJNA333307	XTOC	Estep_ME008v-1
SRR4116478	Setaria italica	0.9872	0.9833	0.9891	WGS	SAMN05442806	JGI	public	SRX2095998	Illumina HiSeq 2000	PAIRED	RANDOM	GENOMIC	Setaria viridis	ILLUMINA	2016-09-01T00:00:00Z	Gp0114267	SRP084005	7435038900	4682185047	PRJNA333307	XTOC	Estep_ME008v-1
SRR4116485	ME034	0.9689	0.964	0.9665	WGS	SAMN05442803	JGI	public	SRX2096005	Illumina HiSeq 2500	PAIRED	RANDOM	GENOMIC	Setaria viridis	ILLUMINA	2016-09-01T00:00:00Z	Gp0114278	SRP084009	13050691800	6597088392	PRJNA334427	XCGU	Estep_ME046-1
SRR4116486	Setaria italica	0.9827	0.9772	0.9833	WGS	SAMN05446321	JGI	public	SRX2096006	Illumina HiSeq 2500	PAIRED	RANDOM	GENOMIC	Setaria viridis	ILLUMINA	2016-09-01T00:00:00Z	Gp0114280	SRP084010	15359305800	7849671877	PRJNA334429	XCGX	Estep_ME050V-1
SRR4116487	ME034	0.8468	0.8434	0.8457	WGS	SAMN05442802	JGI	public	SRX2096007	Illumina HiSeq 2500	PAIRED	RANDOM	GENOMIC	Setaria viridis	ILLUMINA	2016-09-01T00:00:00Z	Gp0114281	SRP084011	19926837600	9677736573	PRJNA334430	XCGY	Estep_ME051V-1
SRR4116488	ME034	0.9719	0.965	0.9684	WGS	SAMN05446313	JGI	public	SRX2096008	Illumina HiSeq 2500	PAIRED	RANDOM	GENOMIC	Setaria viridis	ILLUMINA	2016-09-01T00:00:00Z	Gp0114272	SRP084012	14925322800	7110051547	PRJNA334421	XCGH	Estep_ME021-1
SRR4116489	ME034	0.9801	0.9726	0.9774	WGS	SAMN05446314	JGI	public	SRX2096009	Illumina HiSeq 2500	PAIRED	RANDOM	GENOMIC	Setaria viridis	ILLUMINA	2016-09-01T00:00:00Z	Gp0114274	SRP084013	15188297700	7387856189	PRJNA334423	XCGO	Estep_ME023V-1
SRR4116490	ME034	0.977	0.9695	0.9738	WGS	SAMN05446318	JGI	public	SRX2096010	Illumina HiSeq 2500	PAIRED	RANDOM	GENOMIC	Setaria viridis	ILLUMINA	2016-09-01T00:00:00Z	Gp0114276	SRP084014	19941654300	9712322571	PRJNA334425	XCGS	Estep_ME033V-1
SRR4116491	ME034	0.7215	0.7179	0.7192	WGS	SAMN05442804	JGI	public	SRX2096011	Illumina HiSeq 2500	PAIRED	RANDOM	GENOMIC	Setaria viridis	ILLUMINA	2016-09-01T00:00:00Z	Gp0114273	SRP084015	16442354700	7175026654	PRJNA334422	XCGN	Estep_ME022-1
SRR4116492	Setaria italica	0.9217	0.9203	0.923	WGS	SAMN05446322	JGI	public	SRX2096012	Illumina HiSeq 2500	PAIRED	RANDOM	GENOMIC	Setaria viridis	ILLUMINA	2016-09-01T00:00:00Z	Gp0114284	SRP084016	35185140300	17155904397	PRJNA334433	XCHA	Estep_ME074-1
SRR4116493	ME034	0.8942	0.8907	0.8919	WGS	SAMN05446315	JGI	public	SRX2096013	Illumina HiSeq 2500	PAIRED	RANDOM	GENOMIC	Setaria viridis	ILLUMINA	2016-09-01T00:00:00Z	Gp0114275	SRP084017	17470503300	8852280676	PRJNA334424	XCGP	Estep_ME026-1
SRR4116494	ME034	0.7888	0.7844	0.7881	WGS	SAMN05446320	JGI	public	SRX2096014	Illumina HiSeq 2500	PAIRED	RANDOM	GENOMIC	Setaria viridis	ILLUMINA	2016-09-01T00:00:00Z	Gp0114279	SRP084019	18751329300	8612481585	PRJNA334428	XCGW	Estep_ME049V-1
SRR4116495	Setaria italica	0.9708	0.9636	0.9719	WGS	SAMN05446203	JGI	public	SRX2096015	Illumina HiSeq 2500	PAIRED	RANDOM	GENOMIC	Setaria viridis	ILLUMINA	2016-09-01T00:00:00Z	Gp0114282	SRP084018	19897826700	9297850906	PRJNA334431	XCGZ	Estep_ME062-1
SRR4150488	Setaria italica	0.9249	0.9225	0.9266	WGS	SAMN05442997	JGI	public	SRX2127717	Illumina HiSeq 2500	PAIRED	RANDOM	GENOMIC	Setaria viridis	ILLUMINA	2016-09-04T00:00:00Z	Gp0110738	SRP085452	15773028000	7602620322	PRJNA333566	AGTTC	Agnes_95.79
SRR4150493	Setaria italica	0.975	0.973	0.9771	WGS	SAMN05446873	JGI	public	SRX2127722	Illumina HiSeq 2500	PAIRED	RANDOM	GENOMIC	Setaria viridis	ILLUMINA	2016-09-04T00:00:00Z	Gp0110739	SRP085455	15046260600	7318631838	PRJNA333567	AGTTG	Agnes_96.79
SRR4150494	ME034	0.892	0.8907	0.8896	WGS	SAMN05446871	JGI	public	SRX2127723	Illumina HiSeq 2500	PAIRED	RANDOM	GENOMIC	Setaria viridis	ILLUMINA	2016-09-04T00:00:00Z	Gp0110736	SRP085456	15142215300	7049133874	PRJNA333564	AGTTH	A10.1_low shatter
SRR4150495	ME034	0.808	0.805	0.8078	WGS	SAMN05446887	JGI	public	SRX2127724	Illumina HiSeq 2500	PAIRED	RANDOM	GENOMIC	Setaria viridis	ILLUMINA	2016-09-04T00:00:00Z	Gp0110768	SRP085457	19561636200	9230581995	PRJNA333596	AGTTS	Feldman_MF127
SRR4150496	ME034	0.8257	0.8231	0.8256	WGS	SAMN05446888	JGI	public	SRX2127725	Illumina HiSeq 2500	PAIRED	RANDOM	GENOMIC	Setaria viridis	ILLUMINA	2016-09-04T00:00:00Z	Gp0110770	SRP085458	15777135900	7632211971	PRJNA333598	AGTTU	Feldman_MF129
SRR4150497	Setaria italica	0.9731	0.9684	0.9736	WGS	SAMN05445857	JGI	public	SRX2127726	Illumina HiSeq 2500	PAIRED	RANDOM	GENOMIC	Setaria viridis	ILLUMINA	2016-09-04T00:00:00Z	Gp0110769	SRP085459	15686276700	7972200922	PRJNA333597	AGTTT	Feldman_MF128
SRR4150498	Setaria italica	0.9717	0.9676	0.9727	WGS	SAMN05446906	JGI	public	SRX2127727	Illumina HiSeq 2500	PAIRED	RANDOM	GENOMIC	Setaria viridis	ILLUMINA	2016-09-04T00:00:00Z	Gp0110771	SRP085460	15079708200	7704161249	PRJNA333599	AGTTW	Feldman_MF133
SRR4150499	ME034	0.7451	0.743	0.7443	WGS	SAMN05442963	JGI	public	SRX2127728	Illumina HiSeq 2500	PAIRED	RANDOM	GENOMIC	Setaria viridis	ILLUMINA	2016-09-04T00:00:00Z	Gp0110772	SRP085461	17543972700	8380140819	PRJNA333600	AGTTX	Feldman_MF135
SRR4150503	Setaria italica	0.9609	0.9576	0.9615	WGS	SAMN05446889	JGI	public	SRX2127732	Illumina HiSeq 2500	PAIRED	RANDOM	GENOMIC	Setaria viridis	ILLUMINA	2016-09-04T00:00:00Z	Gp0110773	SRP085465	15621528600	7891556742	PRJNA333601	AGTTY	Feldman_MF136
SRR4150956	ME034	0.8081	0.8055	0.8076	WGS	SAMN05446890	JGI	public	SRX2129131	Illumina HiSeq 2500	PAIRED	RANDOM	GENOMIC	Setaria viridis	ILLUMINA	2016-09-04T00:00:00Z	Gp0110774	SRP085466	16271095800	8081596732	PRJNA333602	AGTTZ	Feldman_MF137
SRR4151925	Setaria italica	0.9819	0.98	0.9842	WGS	SAMN05446872	JGI	public	SRX2129154	Illumina HiSeq 2500	PAIRED	RANDOM	GENOMIC	Setaria viridis	ILLUMINA	2016-09-04T00:00:00Z	Gp0110737	SRP085486	14703843600	7119433899	PRJNA333565	AGTTB	Agnes_91.79
SRR4151926	ME034	0.8651	0.8614	0.863	WGS	SAMN05446901	JGI	public	SRX2129155	Illumina HiSeq 2500	PAIRED	RANDOM	GENOMIC	Setaria viridis	ILLUMINA	2016-09-04T00:00:00Z	Gp0110788	SRP085488	9954309900	5523850346	PRJNA333616	AGTUY	Feldman_MF154
SRR4151927	ME034	0.7957	0.7927	0.7932	WGS	SAMN05445858	JGI	public	SRX2129156	Illumina HiSeq 2500	PAIRED	RANDOM	GENOMIC	Setaria viridis	ILLUMINA	2016-09-04T00:00:00Z	Gp0110784	SRP085487	17415468300	8449992611	PRJNA333612	AGTUT	Feldman_MF149
SRR4151928	ME034	0.7254	0.7232	0.724	WGS	SAMN05446891	JGI	public	SRX2129157	Illumina HiSeq 2500	PAIRED	RANDOM	GENOMIC	Setaria viridis	ILLUMINA	2016-09-04T00:00:00Z	Gp0110775	SRP085489	17060407800	8384365226	PRJNA333603	AGTUA	Feldman_MF138
SRR4151929	ME034	0.9356	0.9316	0.9347	WGS	SAMN05443090	JGI	public	SRX2129158	Illumina HiSeq 2500	PAIRED	RANDOM	GENOMIC	Setaria viridis	ILLUMINA	2016-09-04T00:00:00Z	Gp0110815	SRP085490	14478696000	7692645242	PRJNA333643	AGTWS	Kellogg_1210-1
SRR4151930	Setaria italica	0.7497	0.7471	0.7499	WGS	SAMN05446956	JGI	public	SRX2129159	Illumina HiSeq 2500	PAIRED	RANDOM	GENOMIC	Setaria viridis	ILLUMINA	2016-09-04T00:00:00Z	Gp0110791	SRP085491	16565989200	8679126287	PRJNA333619	AGTWB	Feldman_MF158
SRR4151931	ME034	0.9698	0.9674	0.9679	WGS	SAMN05446957	JGI	public	SRX2129160	Illumina HiSeq 2500	PAIRED	RANDOM	GENOMIC	Setaria viridis	ILLUMINA	2016-09-04T00:00:00Z	Gp0110792	SRP085492	15825332700	8349329320	PRJNA333620	AGTWC	Feldman_MF159
SRR4151932	ME034	0.7345	0.7318	0.7326	WGS	SAMN05446642	JGI	public	SRX2129161	Illumina HiSeq 2500	PAIRED	RANDOM	GENOMIC	Setaria viridis	ILLUMINA	2016-09-04T00:00:00Z	Gp0110779	SRP085493	15603383400	7478016980	PRJNA333607	AGTUH	Feldman_MF143
SRR4151933	ME034	0.7897	0.7869	0.788	WGS	SAMN05442961	JGI	public	SRX2129162	Illumina HiSeq 2500	PAIRED	RANDOM	GENOMIC	Setaria viridis	ILLUMINA	2016-09-04T00:00:00Z	Gp0110790	SRP085494	14866840200	7818437712	PRJNA333618	AGTWA	Feldman_MF156
SRR4151934	ME034	0.973	0.9672	0.9705	WGS	SAMN05446900	JGI	public	SRX2129163	Illumina HiSeq 2500	PAIRED	RANDOM	GENOMIC	Setaria viridis	ILLUMINA	2016-09-04T00:00:00Z	Gp0110787	SRP085495	10778018700	5962057345	PRJNA333615	AGTUX	Feldman_MF152
SRR4151935	ME034	0.9764	0.9687	0.9757	WGS	SAMN05446894	JGI	public	SRX2129164	Illumina HiSeq 2500	PAIRED	RANDOM	GENOMIC	Setaria viridis	ILLUMINA	2016-09-04T00:00:00Z	Gp0110778	SRP085496	14747824200	7442460579	PRJNA333606	AGTUG	Feldman_MF142
SRR4151936	ME034	0.9788	0.9747	0.9758	WGS	SAMN05446955	JGI	public	SRX2129165	Illumina HiSeq 2500	PAIRED	RANDOM	GENOMIC	Setaria viridis	ILLUMINA	2016-09-04T00:00:00Z	Gp0110789	SRP085497	12420791400	6821599780	PRJNA333617	AGTUZ	Feldman_MF155
SRR4151937	ME034	0.7933	0.7902	0.7931	WGS	SAMN05446893	JGI	public	SRX2129166	Illumina HiSeq 2500	PAIRED	RANDOM	GENOMIC	Setaria viridis	ILLUMINA	2016-09-04T00:00:00Z	Gp0110777	SRP085498	17058664500	8505373154	PRJNA333605	AGTUC	Feldman_MF141
SRR4151938	ME034	0.9816	0.9766	0.9786	WGS	SAMN05446892	JGI	public	SRX2129167	Illumina HiSeq 2500	PAIRED	RANDOM	GENOMIC	Setaria viridis	ILLUMINA	2016-09-04T00:00:00Z	Gp0110776	SRP085499	15497482800	8041243094	PRJNA333604	AGTUB	Feldman_MF140
SRR4151939	ME034	0.9734	0.9698	0.9709	WGS	SAMN05446896	JGI	public	SRX2129168	Illumina HiSeq 2500	PAIRED	RANDOM	GENOMIC	Setaria viridis	ILLUMINA	2016-09-04T00:00:00Z	Gp0110782	SRP085500	15436034400	7641899795	PRJNA333610	AGTUP	Feldman_MF146
SRR4151940	ME034	0.8116	0.8076	0.8094	WGS	SAMN05446895	JGI	public	SRX2129169	Illumina HiSeq 2500	PAIRED	RANDOM	GENOMIC	Setaria viridis	ILLUMINA	2016-09-04T00:00:00Z	Gp0110781	SRP085501	17252643900	8427027046	PRJNA333609	AGTUO	Feldman_MF145
SRR4151941	ME034	0.9523	0.9442	0.952	WGS	SAMN05447172	JGI	public	SRX2129170	Illumina HiSeq 2500	PAIRED	RANDOM	GENOMIC	Setaria viridis	ILLUMINA	2016-09-04T00:00:00Z	Gp0110819	SRP085502	15744986100	8517045760	PRJNA333647	AGTWW	Kellogg_1226-1
SRR4151943	ME034	0.9769	0.9729	0.9735	WGS	SAMN05446898	JGI	public	SRX2129172	Illumina HiSeq 2500	PAIRED	RANDOM	GENOMIC	Setaria viridis	ILLUMINA	2016-09-04T00:00:00Z	Gp0110785	SRP085504	14342994000	7150522259	PRJNA333613	AGTUU	Feldman_MF150
SRR4151946	ME034	0.6261	0.6253	0.6259	WGS	SAMN05442996	JGI	public	SRX2129175	Illumina HiSeq 2500	PAIRED	RANDOM	GENOMIC	Setaria viridis	ILLUMINA	2016-09-04T00:00:00Z	Gp0110741	SRP085506	17861218800	9197727219	PRJNA333569	AGTWZ	Ahart_17140
SRR4151947	Setaria italica	0.9484	0.9421	0.9495	WGS	SAMN05447159	JGI	public	SRX2129176	Illumina HiSeq 2500	PAIRED	RANDOM	GENOMIC	Setaria viridis	ILLUMINA	2016-09-04T00:00:00Z	Gp0110812	SRP085507	14796543600	7797106976	PRJNA333640	AGTWO	Kellogg_1206-1
SRR4151948	ME034	0.9676	0.9618	0.9632	WGS	SAMN05442962	JGI	public	SRX2129177	Illumina HiSeq 2500	PAIRED	RANDOM	GENOMIC	Setaria viridis	ILLUMINA	2016-09-04T00:00:00Z	Gp0110780	SRP085508	15309148200	7898058523	PRJNA333608	AGTUN	Feldman_MF144
SRR4151949	ME034	0.9755	0.9725	0.9728	WGS	SAMN05446897	JGI	public	SRX2129178	Illumina HiSeq 2500	PAIRED	RANDOM	GENOMIC	Setaria viridis	ILLUMINA	2016-09-04T00:00:00Z	Gp0110783	SRP085509	14848228500	7338746667	PRJNA333611	AGTUS	Feldman_MF147
SRR4151950	ME034	0.7156	0.7121	0.7152	WGS	SAMN05447171	JGI	public	SRX2129179	Illumina HiSeq 2500	PAIRED	RANDOM	GENOMIC	Setaria viridis	ILLUMINA	2016-09-04T00:00:00Z	Gp0110818	SRP085510	19309482600	10088110591	PRJNA333646	AGTWU	Kellogg_1225-1
SRR4151951	ME034	0.6728	0.6705	0.6727	WGS	SAMN05447169	JGI	public	SRX2129578	Illumina HiSeq 2500	PAIRED	RANDOM	GENOMIC	Setaria viridis	ILLUMINA	2016-09-04T00:00:00Z	Gp0110814	SRP085511	14459451600	7549184972	PRJNA333642	AGTWP	Kellogg_1209-1
SRR4151952	ME034	0.7487	0.7466	0.7481	WGS	SAMN05446958	JGI	public	SRX2129657	Illumina HiSeq 2500	PAIRED	RANDOM	GENOMIC	Setaria viridis	ILLUMINA	2016-09-04T00:00:00Z	Gp0110793	SRP085512	17338032900	9106936503	PRJNA333621	AGTWG	Feldman_MF160
SRR4151954	ME034	0.8428	0.84	0.8403	WGS	SAMN05446959	JGI	public	SRX2129854	Illumina HiSeq 2500	PAIRED	RANDOM	GENOMIC	Setaria viridis	ILLUMINA	2016-09-04T00:00:00Z	Gp0110795	SRP085513	19982456100	10661046709	PRJNA333623	AGTWN	Feldman_MF162
SRR4152020	ME034	0.971	0.9652	0.9694	WGS	SAMN05446874	JGI	public	SRX2129963	Illumina HiSeq 2500	PAIRED	RANDOM	GENOMIC	Setaria viridis	ILLUMINA	2016-09-04T00:00:00Z	Gp0110740	SRP085515	18056887800	9701550660	PRJNA333568	AGTWY	Ahart_17139-1
SRR4152573	ME034	0.5935	0.5917	0.5928	WGS	SAMN05446952	JGI	public	SRX2129965	Illumina HiSeq 2500	PAIRED	RANDOM	GENOMIC	Setaria viridis	ILLUMINA	2016-09-04T00:00:00Z	Gp0110797	SRP085517	14534046600	7902355576	PRJNA333625	AGTXB	Gall_NewHaven_s.n.-2
SRR4152737	ME034	0.9601	0.9524	0.9601	WGS	SAMN05443089	JGI	public	SRX2129966	Illumina HiSeq 2500	PAIRED	RANDOM	GENOMIC	Setaria viridis	ILLUMINA	2016-09-04T00:00:00Z	Gp0110817	SRP085518	17354611500	9348698657	PRJNA333645	AGTWT	Kellogg_1222-1
SRR4152738	ME034	0.6104	0.6076	0.61	WGS	SAMN05446960	JGI	public	SRX2129967	Illumina HiSeq 2500	PAIRED	RANDOM	GENOMIC	Setaria viridis	ILLUMINA	2016-09-04T00:00:00Z	Gp0110796	SRP085519	13813536900	7046924451	PRJNA333624	AGTXC	Gall_Fairfield_s.n.
SRR4152751	Setaria italica	0.7175	0.7173	0.7204	WGS	SAMN05446875	JGI	public	SRX2129980	Illumina HiSeq 2500	PAIRED	RANDOM	GENOMIC	Setaria viridis	ILLUMINA	2016-09-04T00:00:00Z	Gp0110742	SRP085532	16018863000	8412989710	PRJNA333570	AGTYC	Estep_ME010-1
SRR4152755	ME034	0.6411	0.6387	0.6405	WGS	SAMN05446876	JGI	public	SRX2129984	Illumina HiSeq 2500	PAIRED	RANDOM	GENOMIC	Setaria viridis	ILLUMINA	2016-09-04T00:00:00Z	Gp0110743	SRP085536	15826483800	8226650998	PRJNA333571	AGTYG	Estep_ME011-2
SRR4152756	ME034	0.9668	0.9645	0.9643	WGS	SAMN05447157	JGI	public	SRX2129985	Illumina HiSeq 2500	PAIRED	RANDOM	GENOMIC	Setaria viridis	ILLUMINA	2016-09-04T00:00:00Z	Gp0110809	SRP085537	14404364100	8047712944	PRJNA333637	AGTYN	Kellogg_1186
SRR4152757	Setaria italica	0.9782	0.9768	0.9794	WGS	SAMN05447158	JGI	public	SRX2129986	Illumina HiSeq 2500	PAIRED	RANDOM	GENOMIC	Setaria viridis	ILLUMINA	2016-09-04T00:00:00Z	Gp0110810	SRP085538	15387909300	8296639045	PRJNA333638	AGTYO	Kellogg_1198
SRR4152758	Setaria italica	0.8739	0.8729	0.8753	WGS	SAMN05446643	JGI	public	SRX2129987	Illumina HiSeq 2500	PAIRED	RANDOM	GENOMIC	Setaria viridis	ILLUMINA	2016-09-04T00:00:00Z	Gp0110811	SRP085539	11713927200	6214837306	PRJNA333639	AGTYP	Kellogg_1204
SRR4152759	ME034	0.9318	0.9291	0.9285	WGS	SAMN05446877	JGI	public	SRX2129988	Illumina HiSeq 2500	PAIRED	RANDOM	GENOMIC	Setaria viridis	ILLUMINA	2016-09-04T00:00:00Z	Gp0110745	SRP085540	17430530700	9796718945	PRJNA333573	AGTZB	Estep_ME024V
SRR4152761	Setaria italica	0.9788	0.9777	0.9801	WGS	SAMN05447160	JGI	public	SRX2129990	Illumina HiSeq 2500	PAIRED	RANDOM	GENOMIC	Setaria viridis	ILLUMINA	2016-09-04T00:00:00Z	Gp0110813	SRP085542	16246659000	8727363402	PRJNA333641	AGTYS	Kellogg_1209
SRR4152763	Setaria italica	0.7963	0.7983	0.8009	WGS	SAMN05446947	JGI	public	SRX2129992	Illumina HiSeq 2500	PAIRED	RANDOM	GENOMIC	Setaria viridis	ILLUMINA	2016-09-04T00:00:00Z	Gp0110747	SRP085544	13783776900	7133082457	PRJNA333575	AGTZG	Estep_ME059V
SRR4152764	Setaria italica	0.8841	0.8811	0.8849	WGS	SAMN05447170	JGI	public	SRX2129993	Illumina HiSeq 2500	PAIRED	RANDOM	GENOMIC	Setaria viridis	ILLUMINA	2016-09-04T00:00:00Z	Gp0110816	SRP085545	14140056300	7436334884	PRJNA333644	AGTYT	Kellogg_1220
SRR4152765	ME034	0.9717	0.9681	0.9684	WGS	SAMN05442995	JGI	public	SRX2129994	Illumina HiSeq 2500	PAIRED	RANDOM	GENOMIC	Setaria viridis	ILLUMINA	2016-09-04T00:00:00Z	Gp0110744	SRP085546	16436041500	9407820552	PRJNA333572	AGTZA	Estep_ME014
SRR4152766	ME034	0.9768	0.9754	0.9742	WGS	SAMN05442994	JGI	public	SRX2129995	Illumina HiSeq 2500	PAIRED	RANDOM	GENOMIC	Setaria viridis	ILLUMINA	2016-09-04T00:00:00Z	Gp0110746	SRP085547	13995119100	7967910119	PRJNA333574	AGTZC	Estep_ME032V
SRR4158132	Setaria italica	0.9822	0.9768	0.9826	WGS	SAMN05442888	JGI	public	SRX2134102	Illumina HiSeq 2500	PAIRED	RANDOM	GENOMIC	Setaria viridis	ILLUMINA	2016-09-04T00:00:00Z	Gp0110690	SRP085754	15647026794	8010784463	PRJNA334204	AGYOH	12_0539
SRR4158133	ME034	0.7382	0.7358	0.7375	WGS	SAMN05447008	JGI	public	SRX2134103	Illumina HiSeq 2500	PAIRED	RANDOM	GENOMIC	Setaria viridis	ILLUMINA	2016-09-04T00:00:00Z	Gp0110691	SRP085755	14682210482	7167956249	PRJNA334205	AGYON	12_0540
SRR4158134	Setaria italica	0.9511	0.9474	0.9515	WGS	SAMN05447009	JGI	public	SRX2134104	Illumina HiSeq 2500	PAIRED	RANDOM	GENOMIC	Setaria viridis	ILLUMINA	2016-09-04T00:00:00Z	Gp0110692	SRP085756	14301548542	7380791419	PRJNA334206	AGYOO	12_0541
SRR4158135	ME034	0.7254	0.7226	0.7247	WGS	SAMN05442887	JGI	public	SRX2134105	Illumina HiSeq 2500	PAIRED	RANDOM	GENOMIC	Setaria viridis	ILLUMINA	2016-09-04T00:00:00Z	Gp0110693	SRP085757	16341979530	7971743453	PRJNA334207	AGYOP	12_0544
SRR4158136	Setaria italica	0.9508	0.9458	0.9511	WGS	SAMN05447020	JGI	public	SRX2134106	Illumina HiSeq 2500	PAIRED	RANDOM	GENOMIC	Setaria viridis	ILLUMINA	2016-09-04T00:00:00Z	Gp0110696	SRP085758	14904618684	7490177510	PRJNA334210	AGYOU	12_0549
SRR4158144	ME034	0.7985	0.7951	0.7983	WGS	SAMN05442886	JGI	public	SRX2134114	Illumina HiSeq 2500	PAIRED	RANDOM	GENOMIC	Setaria viridis	ILLUMINA	2016-09-04T00:00:00Z	Gp0110695	SRP085760	16327547856	8003734585	PRJNA334209	AGYOT	12_0547
SRR4158145	ME034	0.7765	0.7744	0.776	WGS	SAMN05447021	JGI	public	SRX2134115	Illumina HiSeq 2500	PAIRED	RANDOM	GENOMIC	Setaria viridis	ILLUMINA	2016-09-04T00:00:00Z	Gp0110697	SRP085761	17137220426	8351777200	PRJNA334211	AGYOW	12_0550
SRR4158146	Setaria italica	0.9742	0.9683	0.975	WGS	SAMN05447010	JGI	public	SRX2134116	Illumina HiSeq 2500	PAIRED	RANDOM	GENOMIC	Setaria viridis	ILLUMINA	2016-09-04T00:00:00Z	Gp0110694	SRP085763	16291694114	8357998588	PRJNA334208	AGYOS	12_0546
SRR4158147	ME034	0.7767	0.7737	0.7756	WGS	SAMN05445505	JGI	public	SRX2134117	Illumina HiSeq 2500	PAIRED	RANDOM	GENOMIC	Setaria viridis	ILLUMINA	2016-09-04T00:00:00Z	Gp0110701	SRP085762	16331047130	7889143963	PRJNA334215	AGYPA	12_0555
SRR4158148	Setaria italica	0.9724	0.9669	0.9731	WGS	SAMN05447024	JGI	public	SRX2134118	Illumina HiSeq 2500	PAIRED	RANDOM	GENOMIC	Setaria viridis	ILLUMINA	2016-09-04T00:00:00Z	Gp0110700	SRP085764	15264181696	7665104885	PRJNA334214	AGYOZ	12_0554
SRR4158149	Setaria italica	0.9631	0.9588	0.9634	WGS	SAMN05442885	JGI	public	SRX2134119	Illumina HiSeq 2500	PAIRED	RANDOM	GENOMIC	Setaria viridis	ILLUMINA	2016-09-04T00:00:00Z	Gp0110702	SRP085765	16530896838	8332308684	PRJNA334216	AGYPB	12_0557
SRR4158150	ME034	0.7638	0.7614	0.7627	WGS	SAMN05447023	JGI	public	SRX2134120	Illumina HiSeq 2500	PAIRED	RANDOM	GENOMIC	Setaria viridis	ILLUMINA	2016-09-04T00:00:00Z	Gp0110699	SRP085766	17288652286	8233699095	PRJNA334213	AGYOY	12_0553
SRR4158151	ME034	0.9515	0.9458	0.9515	WGS	SAMN05447022	JGI	public	SRX2134121	Illumina HiSeq 2500	PAIRED	RANDOM	GENOMIC	Setaria viridis	ILLUMINA	2016-09-04T00:00:00Z	Gp0110698	SRP085767	14107887720	7306615797	PRJNA334212	AGYOX	12_0551
SRR4158152	ME034	0.7496	0.7471	0.7481	WGS	SAMN05447025	JGI	public	SRX2134122	Illumina HiSeq 2500	PAIRED	RANDOM	GENOMIC	Setaria viridis	ILLUMINA	2016-09-04T00:00:00Z	Gp0110703	SRP085768	16666541648	8159964344	PRJNA334217	AGYPC	12_0558
SRR4158153	ME034	0.973	0.9686	0.9699	WGS	SAMN05446860	JGI	public	SRX2134123	Illumina HiSeq 2500	PAIRED	RANDOM	GENOMIC	Setaria viridis	ILLUMINA	2016-09-04T00:00:00Z	Gp0110718	SRP085769	14803259934	7753230340	PRJNA334232	AGYSC	12_0581
SRR4158154	ME034	0.8014	0.7983	0.8013	WGS	SAMN05446857	JGI	public	SRX2134124	Illumina HiSeq 2500	PAIRED	RANDOM	GENOMIC	Setaria viridis	ILLUMINA	2016-09-04T00:00:00Z	Gp0110715	SRP085770	17782466982	9015306543	PRJNA334229	AGYPZ	12_0575
SRR4158155	Setaria italica	0.9682	0.9622	0.9687	WGS	SAMN05445512	JGI	public	SRX2134125	Illumina HiSeq 2500	PAIRED	RANDOM	GENOMIC	Setaria viridis	ILLUMINA	2016-09-04T00:00:00Z	Gp0110712	SRP085771	15739905384	7992700531	PRJNA334226	AGYPW	12_0572
SRR4158156	ME034	0.7989	0.7954	0.7984	WGS	SAMN05442884	JGI	public	SRX2134126	Illumina HiSeq 2500	PAIRED	RANDOM	GENOMIC	Setaria viridis	ILLUMINA	2016-09-04T00:00:00Z	Gp0110706	SRP085772	17038878052	8450803777	PRJNA334220	AGYPN	12_0563
SRR4158157	ME034	0.9685	0.962	0.9683	WGS	SAMN05446945	JGI	public	SRX2134127	Illumina HiSeq 2500	PAIRED	RANDOM	GENOMIC	Setaria viridis	ILLUMINA	2016-09-04T00:00:00Z	Gp0110709	SRP085773	13975163854	7296553626	PRJNA334223	AGYPS	12_0566
SRR4158158	Setaria italica	0.9555	0.9509	0.9564	WGS	SAMN05442883	JGI	public	SRX2134128	Illumina HiSeq 2500	PAIRED	RANDOM	GENOMIC	Setaria viridis	ILLUMINA	2016-09-04T00:00:00Z	Gp0110711	SRP085774	14884593366	7663499467	PRJNA334225	AGYPU	12_0569
SRR4158159	Setaria italica	0.9741	0.9688	0.9746	WGS	SAMN05447027	JGI	public	SRX2134129	Illumina HiSeq 2500	PAIRED	RANDOM	GENOMIC	Setaria viridis	ILLUMINA	2016-09-04T00:00:00Z	Gp0110707	SRP085776	13476397566	6862084194	PRJNA334221	AGYPO	12_0564
SRR4158160	ME034	0.8	0.7975	0.7998	WGS	SAMN05446946	JGI	public	SRX2134130	Illumina HiSeq 2500	PAIRED	RANDOM	GENOMIC	Setaria viridis	ILLUMINA	2016-09-04T00:00:00Z	Gp0110710	SRP085775	16573519608	8284367112	PRJNA334224	AGYPT	12_0567
SRR4158162	ME034	0.7486	0.7452	0.7473	WGS	SAMN05446863	JGI	public	SRX2134132	Illumina HiSeq 2500	PAIRED	RANDOM	GENOMIC	Setaria viridis	ILLUMINA	2016-09-04T00:00:00Z	Gp0110722	SRP085777	16756191858	8736137004	PRJNA334236	AGYSO	12_0591
SRR4158163	Setaria italica	0.9746	0.9688	0.975	WGS	SAMN05446640	JGI	public	SRX2134133	Illumina HiSeq 2500	PAIRED	RANDOM	GENOMIC	Setaria viridis	ILLUMINA	2016-09-04T00:00:00Z	Gp0110705	SRP085778	15473329984	8011077536	PRJNA334219	AGYPH	12_0560
SRR4158164	ME034	0.7551	0.7529	0.7537	WGS	SAMN05447026	JGI	public	SRX2134134	Illumina HiSeq 2500	PAIRED	RANDOM	GENOMIC	Setaria viridis	ILLUMINA	2016-09-04T00:00:00Z	Gp0110704	SRP085779	16095176976	7957169469	PRJNA334218	AGYPG	12_0559
SRR4158165	ME034	0.8576	0.8538	0.8569	WGS	SAMN05446859	JGI	public	SRX2134135	Illumina HiSeq 2500	PAIRED	RANDOM	GENOMIC	Setaria viridis	ILLUMINA	2016-09-04T00:00:00Z	Gp0110717	SRP085782	13492065326	7006626895	PRJNA334231	AGYSB	12_0580
SRR4158166	Setaria italica	0.7849	0.7821	0.7852	WGS	SAMN05446861	JGI	public	SRX2134136	Illumina HiSeq 2500	PAIRED	RANDOM	GENOMIC	Setaria viridis	ILLUMINA	2016-09-04T00:00:00Z	Gp0110720	SRP085780	15954603224	8191102309	PRJNA334234	AGYSH	12_0586
SRR4158167	ME034	0.7446	0.7422	0.7445	WGS	SAMN05447028	JGI	public	SRX2134138	Illumina HiSeq 2500	PAIRED	RANDOM	GENOMIC	Setaria viridis	ILLUMINA	2016-09-04T00:00:00Z	Gp0110708	SRP085783	17035947142	8274526807	PRJNA334222	AGYPP	12_0565
SRR4158168	Setaria italica	0.9729	0.9679	0.9737	WGS	SAMN05446862	JGI	public	SRX2134140	Illumina HiSeq 2500	PAIRED	RANDOM	GENOMIC	Setaria viridis	ILLUMINA	2016-09-04T00:00:00Z	Gp0110721	SRP085785	16190194934	8513543217	PRJNA334235	AGYSN	12_0590
SRR4158169	ME034	0.9618	0.9557	0.9617	WGS	SAMN05442882	JGI	public	SRX2134141	Illumina HiSeq 2500	PAIRED	RANDOM	GENOMIC	Setaria viridis	ILLUMINA	2016-09-04T00:00:00Z	Gp0110714	SRP085786	15157972826	7760434120	PRJNA334228	AGYPY	12_0574
SRR4158170	ME034	0.7563	0.7537	0.7549	WGS	SAMN05445849	JGI	public	SRX2134142	Illumina HiSeq 2500	PAIRED	RANDOM	GENOMIC	Setaria viridis	ILLUMINA	2016-09-04T00:00:00Z	Gp0110713	SRP085787	15027538120	7565390378	PRJNA334227	AGYPX	12_0573
SRR4158171	Setaria italica	0.9682	0.9635	0.9686	WGS	SAMN05446858	JGI	public	SRX2134143	Illumina HiSeq 2500	PAIRED	RANDOM	GENOMIC	Setaria viridis	ILLUMINA	2016-09-04T00:00:00Z	Gp0110716	SRP085788	15291921604	7753960896	PRJNA334230	AGYSA	12_0579
SRR4158172	ME034	0.7323	0.7301	0.731	WGS	SAMN05443001	JGI	public	SRX2134144	Illumina HiSeq 2500	PAIRED	RANDOM	GENOMIC	Setaria viridis	ILLUMINA	2016-09-04T00:00:00Z	Gp0110719	SRP085789	15074775752	7702990876	PRJNA334233	AGYSG	12_0582
SRR4158190	ME034	0.9709	0.9655	0.97	WGS	SAMN05443000	JGI	public	SRX2134158	Illumina HiSeq 2500	PAIRED	RANDOM	GENOMIC	Setaria viridis	ILLUMINA	2016-09-04T00:00:00Z	Gp0110723	SRP085791	15819600164	8373372826	PRJNA334237	AGYSP	12_0593
SRR4158196	ME034	0.9777	0.9708	0.975	WGS	SAMN05446866	JGI	public	SRX2134162	Illumina HiSeq 2500	PAIRED	RANDOM	GENOMIC	Setaria viridis	ILLUMINA	2016-09-04T00:00:00Z	Gp0110728	SRP085793	9450220240	5382791784	PRJNA333556	AGYSX	12_0605
SRR4158201	ME034	0.846	0.8409	0.8438	WGS	SAMN05446865	JGI	public	SRX2134165	Illumina HiSeq 2500	PAIRED	RANDOM	GENOMIC	Setaria viridis	ILLUMINA	2016-09-04T00:00:00Z	Gp0110726	SRP085794	11192200332	6355858650	PRJNA333554	AGYSU	12_0598
SRR4158203	ME034	0.7451	0.7415	0.7438	WGS	SAMN05446867	JGI	public	SRX2134167	Illumina HiSeq 2500	PAIRED	RANDOM	GENOMIC	Setaria viridis	ILLUMINA	2016-09-04T00:00:00Z	Gp0110729	SRP085795	15301122034	8530094072	PRJNA333557	AGYSY	12_0606
SRR4158205	ME034	0.9798	0.9752	0.9792	WGS	SAMN05446864	JGI	public	SRX2134169	Illumina HiSeq 2500	PAIRED	RANDOM	GENOMIC	Setaria viridis	ILLUMINA	2016-09-04T00:00:00Z	Gp0110725	SRP085796	14043487428	7404649047	PRJNA334239	AGYST	12_0597
SRR4158209	Setaria italica	0.9723	0.9665	0.9728	WGS	SAMN05442998	JGI	public	SRX2134171	Illumina HiSeq 2500	PAIRED	RANDOM	GENOMIC	Setaria viridis	ILLUMINA	2016-09-04T00:00:00Z	Gp0110732	SRP085797	20018797518	10380683014	PRJNA333560	AGYTB	12_0612
SRR4158210	ME034	0.836	0.8317	0.8343	WGS	SAMN05446006	JGI	public	SRX2134173	Illumina HiSeq 2500	PAIRED	RANDOM	GENOMIC	Setaria viridis	ILLUMINA	2016-09-04T00:00:00Z	Gp0110724	SRP085798	23004959324	12186238328	PRJNA334238	AGYSS	12_0594
SRR4158213	ME034	0.7248	0.7229	0.7244	WGS	SAMN05446641	JGI	public	SRX2134174	Illumina HiSeq 2500	PAIRED	RANDOM	GENOMIC	Setaria viridis	ILLUMINA	2016-09-04T00:00:00Z	Gp0110733	SRP085799	14029519022	7181124017	PRJNA333561	AGYTC	12_0614
SRR4158214	ME034	0.981	0.9757	0.9779	WGS	SAMN05446868	JGI	public	SRX2134175	Illumina HiSeq 2500	PAIRED	RANDOM	GENOMIC	Setaria viridis	ILLUMINA	2016-09-04T00:00:00Z	Gp0110730	SRP085800	15549419790	8105309321	PRJNA333558	AGYSZ	12_0610
SRR4158215	ME034	0.9788	0.973	0.9775	WGS	SAMN05446869	JGI	public	SRX2134176	Illumina HiSeq 2500	PAIRED	RANDOM	GENOMIC	Setaria viridis	ILLUMINA	2016-09-04T00:00:00Z	Gp0110731	SRP085801	14484740836	7517273629	PRJNA333559	AGYTA	12_0611
SRR4158224	Setaria italica	0.9682	0.9627	0.9683	WGS	SAMN05446870	JGI	public	SRX2134178	Illumina HiSeq 2500	PAIRED	RANDOM	GENOMIC	Setaria viridis	ILLUMINA	2016-09-04T00:00:00Z	Gp0110734	SRP085802	15142109370	7967695945	PRJNA333562	AGYTG	12_0624
SRR4158236	ME034	0.7508	0.749	0.7507	WGS	SAMN05446548	JGI	public	SRX2134184	Illumina HiSeq 2500	PAIRED	RANDOM	GENOMIC	Setaria viridis	ILLUMINA	2016-09-04T00:00:00Z	Gp0110735	SRP085803	15753548838	8114108026	PRJNA333563	AGYTH	12_0627
SRR4158244	Setaria italica	0.7507	0.7506	0.7509	WGS	SAMN05446878	JGI	public	SRX2134186	Illumina HiSeq 2500	PAIRED	RANDOM	GENOMIC	Setaria viridis	ILLUMINA	2016-09-04T00:00:00Z	Gp0110748	SRP085804	15790705710	7811356635	PRJNA333576	AGYTN	Feldman MF131
SRR4158245	ME034	0.9698	0.9669	0.9694	WGS	SAMN05446949	JGI	public	SRX2134187	Illumina HiSeq 2500	PAIRED	RANDOM	GENOMIC	Setaria viridis	ILLUMINA	2016-09-05T00:00:00Z	Gp0110751	SRP085805	15859886964	8503623143	PRJNA333579	AGYTS	Feldman MF166
SRR4158246	ME034	0.689	0.6871	0.6879	WGS	SAMN05442967	JGI	public	SRX2134188	Illumina HiSeq 2500	PAIRED	RANDOM	GENOMIC	Setaria viridis	ILLUMINA	2016-09-05T00:00:00Z	Gp0110757	SRP085806	18806760986	9355206715	PRJNA333585	AGYTZ	Feldman MF175
SRR4158247	ME034	0.9699	0.9646	0.9667	WGS	SAMN05442966	JGI	public	SRX2134189	Illumina HiSeq 2500	PAIRED	RANDOM	GENOMIC	Setaria viridis	ILLUMINA	2016-09-05T00:00:00Z	Gp0110760	SRP085807	19666564650	10449956900	PRJNA333588	AGYUC	Feldman MF179
SRR4158248	ME034	0.746	0.744	0.7441	WGS	SAMN05446950	JGI	public	SRX2134190	Illumina HiSeq 2500	PAIRED	RANDOM	GENOMIC	Setaria viridis	ILLUMINA	2016-09-05T00:00:00Z	Gp0110752	SRP085808	18662954626	9393834115	PRJNA333580	AGYTT	Feldman MF167
SRR4158249	ME034	0.9608	0.9566	0.9584	WGS	SAMN05446879	JGI	public	SRX2134191	Illumina HiSeq 2500	PAIRED	RANDOM	GENOMIC	Setaria viridis	ILLUMINA	2016-09-05T00:00:00Z	Gp0110756	SRP085809	13773856392	7111706797	PRJNA333584	AGYTY	Feldman MF173
SRR4158250	ME034	0.6841	0.6802	0.6833	WGS	SAMN05446951	JGI	public	SRX2134192	Illumina HiSeq 2500	PAIRED	RANDOM	GENOMIC	Setaria viridis	ILLUMINA	2016-09-05T00:00:00Z	Gp0110754	SRP085810	17272454214	8584763217	PRJNA333582	AGYTW	Feldman MF171
SRR4158251	ME034	0.7575	0.7552	0.7575	WGS	SAMN05446881	JGI	public	SRX2134193	Illumina HiSeq 2500	PAIRED	RANDOM	GENOMIC	Setaria viridis	ILLUMINA	2016-09-05T00:00:00Z	Gp0110759	SRP085811	14837371740	7363089366	PRJNA333587	AGYUB	Feldman MF178
SRR4158252	ME034	0.8061	0.8025	0.8035	WGS	SAMN05442993	JGI	public	SRX2134194	Illumina HiSeq 2500	PAIRED	RANDOM	GENOMIC	Setaria viridis	ILLUMINA	2016-09-05T00:00:00Z	Gp0110750	SRP085812	16929717736	8531573706	PRJNA333578	AGYTP	Feldman MF165
SRR4158253	ME034	0.934	0.9286	0.9331	WGS	SAMN05446007	JGI	public	SRX2134195	Illumina HiSeq 2500	PAIRED	RANDOM	GENOMIC	Setaria viridis	ILLUMINA	2016-09-05T00:00:00Z	Gp0110753	SRP085813	14133445980	7407939829	PRJNA333581	AGYTU	Feldman MF170
SRR4158254	ME034	0.7344	0.7315	0.7338	WGS	SAMN05446882	JGI	public	SRX2134196	Illumina HiSeq 2500	PAIRED	RANDOM	GENOMIC	Setaria viridis	ILLUMINA	2016-09-05T00:00:00Z	Gp0110761	SRP085814	15661752918	7828520816	PRJNA333589	AGYUG	Feldman MF180
SRR4158255	Setaria italica	0.7875	0.7858	0.788	WGS	SAMN05442964	JGI	public	SRX2134197	Illumina HiSeq 2500	PAIRED	RANDOM	GENOMIC	Setaria viridis	ILLUMINA	2016-09-05T00:00:00Z	Gp0110764	SRP085815	16672635404	8036358616	PRJNA333592	AGYUO	Feldman MF183
SRR4158256	Setaria italica	0.9664	0.9618	0.9671	WGS	SAMN05446885	JGI	public	SRX2134198	Illumina HiSeq 2500	PAIRED	RANDOM	GENOMIC	Setaria viridis	ILLUMINA	2016-09-05T00:00:00Z	Gp0110766	SRP085817	15887947596	7993158845	PRJNA333594	AGYUS	Feldman MF186
SRR4158257	ME034	0.9598	0.9559	0.9568	WGS	SAMN05446817	JGI	public	SRX2134199	Illumina HiSeq 2500	PAIRED	RANDOM	GENOMIC	Setaria viridis	ILLUMINA	2016-09-05T00:00:00Z	Gp0110755	SRP085816	14672285856	7711347398	PRJNA333583	AGYTX	Feldman MF172
SRR4158258	ME034	0.8195	0.8179	0.8173	WGS	SAMN05447152	JGI	public	SRX2134200	Illumina HiSeq 2500	PAIRED	RANDOM	GENOMIC	Setaria viridis	ILLUMINA	2016-09-05T00:00:00Z	Gp0110803	SRP085818	15016123728	7284927755	PRJNA333631	AGYUU	Huang MO-05-6
SRR4158259	ME034	0.9727	0.9691	0.9704	WGS	SAMN05446948	JGI	public	SRX2134201	Illumina HiSeq 2500	PAIRED	RANDOM	GENOMIC	Setaria viridis	ILLUMINA	2016-09-05T00:00:00Z	Gp0110749	SRP085819	17990452570	9179269357	PRJNA333577	AGYTO	Feldman MF163
SRR4158260	ME034	0.9788	0.9748	0.9763	WGS	SAMN05446886	JGI	public	SRX2134202	Illumina HiSeq 2500	PAIRED	RANDOM	GENOMIC	Setaria viridis	ILLUMINA	2016-09-05T00:00:00Z	Gp0110767	SRP085820	14823431722	7480050549	PRJNA333595	AGYUT	Feldman MF188
SRR4158261	ME034	0.9758	0.9718	0.975	WGS	SAMN05446883	JGI	public	SRX2134203	Illumina HiSeq 2500	PAIRED	RANDOM	GENOMIC	Setaria viridis	ILLUMINA	2016-09-05T00:00:00Z	Gp0110762	SRP085821	14247130558	7309308642	PRJNA333590	AGYUH	Feldman MF181
SRR4158262	Setaria italica	0.9719	0.9672	0.9722	WGS	SAMN05446884	JGI	public	SRX2134204	Illumina HiSeq 2500	PAIRED	RANDOM	GENOMIC	Setaria viridis	ILLUMINA	2016-09-05T00:00:00Z	Gp0110765	SRP085822	16672284178	8476093783	PRJNA333593	AGYUP	Feldman MF184
SRR4158263	ME034	0.7148	0.7118	0.7148	WGS	SAMN05447150	JGI	public	SRX2134205	Illumina HiSeq 2500	PAIRED	RANDOM	GENOMIC	Setaria viridis	ILLUMINA	2016-09-05T00:00:00Z	Gp0110801	SRP085823	6852551536	4068720561	PRJNA333629	AGYUX	Huang KS-05-4
SRR4158264	ME034	0.7674	0.7648	0.7669	WGS	SAMN05442965	JGI	public	SRX2134206	Illumina HiSeq 2500	PAIRED	RANDOM	GENOMIC	Setaria viridis	ILLUMINA	2016-09-05T00:00:00Z	Gp0110763	SRP085824	14635148614	7079868683	PRJNA333591	AGYUN	Feldman MF182
SRR4158265	ME034	0.9795	0.9759	0.9791	WGS	SAMN05446880	JGI	public	SRX2134207	Illumina HiSeq 2500	PAIRED	RANDOM	GENOMIC	Setaria viridis	ILLUMINA	2016-09-05T00:00:00Z	Gp0110758	SRP085825	16185565274	8438245418	PRJNA333586	AGYUA	Feldman MF176
SRR4158266	Setaria italica	0.9665	0.9633	0.9684	WGS	SAMN05442959	JGI	public	SRX2134208	Illumina HiSeq 2500	PAIRED	RANDOM	GENOMIC	Setaria viridis	ILLUMINA	2016-09-05T00:00:00Z	Gp0110800	SRP085826	14212193688	7159477237	PRJNA333628	AGYUW	Huang KS-02-6
SRR4159287	ME034	0.9712	0.9662	0.9694	WGS	SAMN05447151	JGI	public	SRX2134220	Illumina HiSeq 2500	PAIRED	RANDOM	GENOMIC	Setaria viridis	ILLUMINA	2016-09-05T00:00:00Z	Gp0110802	SRP085836	6904086628	4227804950	PRJNA333630	AGYUY	Huang KS-17-1
SRR4159295	ME034	0.9639	0.9605	0.9633	WGS	SAMN05442960	JGI	public	SRX2134228	Illumina HiSeq 2500	PAIRED	RANDOM	GENOMIC	Setaria viridis	ILLUMINA	2016-09-05T00:00:00Z	Gp0110794	SRP085842	16256327100	8637835093	PRJNA333622	AGTWH	Feldman_MF161
SRR4159296	Setaria italica	0.9618	0.956	0.9625	WGS	SAMN05443091	JGI	public	SRX2134229	Illumina HiSeq 2500	PAIRED	RANDOM	GENOMIC	Setaria viridis	ILLUMINA	2016-09-05T00:00:00Z	Gp0110804	SRP085843	14791527838	7378784218	PRJNA333632	AGYWB	Huang MO-16-7
SRR4159297	Setaria italica	0.9698	0.9648	0.9704	WGS	SAMN05447154	JGI	public	SRX2134230	Illumina HiSeq 2500	PAIRED	RANDOM	GENOMIC	Setaria viridis	ILLUMINA	2016-09-05T00:00:00Z	Gp0110806	SRP085844	15316238040	7726008879	PRJNA333634	AGYWG	Huang VT-01-1
SRR4159298	ME034	0.9705	0.9653	0.9705	WGS	SAMN05447156	JGI	public	SRX2134231	Illumina HiSeq 2500	PAIRED	RANDOM	GENOMIC	Setaria viridis	ILLUMINA	2016-09-05T00:00:00Z	Gp0110808	SRP085845	17116670836	9028999500	PRJNA333636	AGYWN	Huang VT-03-1
SRR4159300	ME034	0.8677	0.8633	0.867	WGS	SAMN05447155	JGI	public	SRX2134233	Illumina HiSeq 2500	PAIRED	RANDOM	GENOMIC	Setaria viridis	ILLUMINA	2016-09-05T00:00:00Z	Gp0110807	SRP085847	15758117796	7850091567	PRJNA333635	AGYWH	Huang VT-02-1
SRR4159301	Setaria italica	0.7955	0.7918	0.7957	WGS	SAMN05446954	JGI	public	SRX2134234	Illumina HiSeq 2500	PAIRED	RANDOM	GENOMIC	Setaria viridis	ILLUMINA	2016-09-05T00:00:00Z	Gp0110799	SRP085848	16178020408	8941497874	PRJNA333627	AGYWC	Huang IL-6
SRR4159302	ME034	0.9781	0.971	0.9738	WGS	SAMN05446953	JGI	public	SRX2134235	Illumina HiSeq 2500	PAIRED	RANDOM	GENOMIC	Setaria viridis	ILLUMINA	2016-09-05T00:00:00Z	Gp0110798	SRP085849	6371153268	3876354566	PRJNA333626	AGYUZ	Huang CO-07-3
SRR4159311	ME034	0.7619	0.7584	0.7612	WGS	SAMN05447153	JGI	public	SRX2134244	Illumina HiSeq 2500	PAIRED	RANDOM	GENOMIC	Setaria viridis	ILLUMINA	2016-09-05T00:00:00Z	Gp0110805	SRP085854	45643577246	27677470029	PRJNA333633	AGYWA	Huang TX-05-1
SRR4175119	ME034	0.9537	0.9454	0.9496	WGS	SAMN05446312	JGI	public	SRX2140414	Illumina HiSeq 2500	PAIRED	RANDOM	GENOMIC	Setaria viridis	ILLUMINA	2016-09-06T00:00:00Z	Gp0114271	SRP086649	13892616600	6146517607	PRJNA334420	XCGG	Estep_ME017-1
SRR4175120	ME034	0.8398	0.836	0.8381	WGS	SAMN05446319	JGI	public	SRX2140415	Illumina HiSeq 2500	PAIRED	RANDOM	GENOMIC	Setaria viridis	ILLUMINA	2016-09-06T00:00:00Z	Gp0114277	SRP086650	18181791600	9500566540	PRJNA334426	XCGT	Estep_ME041-1
SRR4175150	ME034	0.9533	0.9468	0.9532	WGS	SAMN05442942	JGI	public	SRX2140445	Illumina HiSeq 2500	PAIRED	RANDOM	GENOMIC	Setaria viridis	ILLUMINA	2016-09-06T00:00:00Z	Gp0114951	SRP086655	15753293044	8133856473	PRJNA332984	ACOYS	Kellogg_1192_2
SRR4175151	ME034	0.934	0.9259	0.9333	WGS	SAMN05446049	JGI	public	SRX2140446	Illumina HiSeq 2500	PAIRED	RANDOM	GENOMIC	Setaria viridis	ILLUMINA	2016-09-06T00:00:00Z	Gp0114952	SRP086656	13707624772	7042640955	PRJNA332985	ACOYT	Kellogg_1195_1
SRR4175153	ME034	0.9337	0.9271	0.9334	WGS	SAMN05446050	JGI	public	SRX2140448	Illumina HiSeq 2500	PAIRED	RANDOM	GENOMIC	Setaria viridis	ILLUMINA	2016-09-06T00:00:00Z	Gp0114953	SRP086658	14498346842	7375564432	PRJNA332986	ACOYU	Kellogg_1196_1
SRR4175159	ME034	0.9687	0.9611	0.9686	WGS	SAMN05446051	JGI	public	SRX2140454	Illumina HiSeq 2500	PAIRED	RANDOM	GENOMIC	Setaria viridis	ILLUMINA	2016-09-06T00:00:00Z	Gp0114954	SRP086664	14196671794	7392439679	PRJNA334542	ACOYW	Kellogg_1199_2
SRR4175162	ME034	0.9381	0.9301	0.9375	WGS	SAMN05446052	JGI	public	SRX2140457	Illumina HiSeq 2500	PAIRED	RANDOM	GENOMIC	Setaria viridis	ILLUMINA	2016-09-06T00:00:00Z	Gp0114955	SRP086667	13873412504	7162838064	PRJNA334543	ACOYX	Kellogg_1205_2
SRR4175237	ME034	0.9459	0.9383	0.9451	WGS	SAMN05442941	JGI	public	SRX2140495	Illumina HiSeq 2500	PAIRED	RANDOM	GENOMIC	Setaria viridis	ILLUMINA	2016-09-06T00:00:00Z	Gp0114956	SRP086671	13039211796	6948006339	PRJNA334544	ACOYY	Kellogg_1207_1
SRR4175238	ME034	0.9406	0.9345	0.9364	WGS	SAMN05445874	JGI	public	SRX2140496	Illumina HiSeq 2500	PAIRED	RANDOM	GENOMIC	Setaria viridis	ILLUMINA	2016-09-06T00:00:00Z	Gp0114957	SRP086672	13401079068	6929439889	PRJNA334545	ACOYZ	Estep_ME018
SRR4175239	ME034	0.9746	0.9676	0.9745	WGS	SAMN05446103	JGI	public	SRX2140497	Illumina HiSeq 2500	PAIRED	RANDOM	GENOMIC	Setaria viridis	ILLUMINA	2016-09-06T00:00:00Z	Gp0114958	SRP086674	14978342018	7933808497	PRJNA334546	ACOZA	Kellogg_1214_2
SRR4175240	Setaria italica	0.9509	0.9435	0.9511	WGS	SAMN05442940	JGI	public	SRX2140498	Illumina HiSeq 2500	PAIRED	RANDOM	GENOMIC	Setaria viridis	ILLUMINA	2016-09-06T00:00:00Z	Gp0114959	SRP086673	13218976994	6841954909	PRJNA334547	ACOZB	Kellogg_1216_2
SRR4175267	ME034	0.8781	0.8677	0.8767	WGS	SAMN05445872	JGI	public	SRX2140519	Illumina HiSeq 2500	PAIRED	RANDOM	GENOMIC	Setaria viridis	ILLUMINA	2016-09-06T00:00:00Z	Gp0114945	SRP086685	9710578668	4695960054	PRJNA332978	ACPAO	Estep_ME055V_1
SRR4175284	Setaria italica	0.9066	0.9027	0.9094	WGS	SAMN05442945	JGI	public	SRX2140533	Illumina HiSeq 2500	PAIRED	RANDOM	GENOMIC	Setaria viridis	ILLUMINA	2016-09-06T00:00:00Z	Gp0114943	SRP086686	13674237766	7160740373	PRJNA332976	ACPAH	Estep_ME009_2
SRR4175290	Setaria italica	0.9241	0.9195	0.9267	WGS	SAMN05446147	JGI	public	SRX2140538	Illumina HiSeq 2500	PAIRED	RANDOM	GENOMIC	Setaria viridis	ILLUMINA	2016-09-06T00:00:00Z	Gp0114942	SRP086691	13921776898	7192550501	PRJNA332975	ACPAG	Estep_ME005_1
SRR4175299	Setaria italica	0.9013	0.894	0.9017	WGS	SAMN05445873	JGI	public	SRX2140546	Illumina HiSeq 2500	PAIRED	RANDOM	GENOMIC	Setaria viridis	ILLUMINA	2016-09-06T00:00:00Z	Gp0114946	SRP086694	9065524486	4390135955	PRJNA332979	ACPAP	Estep_ME061V_2
SRR4175301	ME034	0.974	0.9637	0.9727	WGS	SAMN05442944	JGI	public	SRX2140547	Illumina HiSeq 2500	PAIRED	RANDOM	GENOMIC	Setaria viridis	ILLUMINA	2016-09-06T00:00:00Z	Gp0114944	SRP086695	13478041050	6879586207	PRJNA332977	ACPAN	Estep_ME053V_2
SRR4176219	Setaria italica	0.8769	0.8709	0.8771	WGS	SAMN05446148	JGI	public	SRX2140935	Illumina HiSeq 2500	PAIRED	RANDOM	GENOMIC	Setaria viridis	ILLUMINA	2016-09-06T00:00:00Z	Gp0114947	SRP086748	12566698368	7067329674	PRJNA332980	ACPGN	Huang_IL_2_1
SRR4176223	ME034	0.9687	0.9613	0.9686	WGS	SAMN05446047	JGI	public	SRX2140939	Illumina HiSeq 2500	PAIRED	RANDOM	GENOMIC	Setaria viridis	ILLUMINA	2016-09-06T00:00:00Z	Gp0114948	SRP086752	14434429750	7261720833	PRJNA332981	ACPGO	Huang_IL_3
SRR4176228	ME034	0.8789	0.8686	0.8737	WGS	SAMN05442943	JGI	public	SRX2140944	Illumina HiSeq 2500	PAIRED	RANDOM	GENOMIC	Setaria viridis	ILLUMINA	2016-09-06T00:00:00Z	Gp0114949	SRP086757	14866484842	7350580570	PRJNA332982	ACPGP	Huang_IL_7_2_1

## Sheet: Table S4
Table S4: Counts of repetitive element classifications for the nine nuclear chromosomes of S. viridis ME034V.
Note that counts are determined as unique instances of each sub-family in the assembly GFF. Element counts may differ slightly from those in Table S2, which is derived from the RepeatMasker .tbl output file.
Type	Sub-Classification	Counts
Low_complexity		8333
Unknown		54709
DNA Transposons	hAT-Tag1	721
	hAT	944
	DNA	1228
	hAT-Tip100	1642
	hAT-Ac	3808
	MULE-MuDR	11521
	TcMar-Stowaway	17178
	PIF-Harbinger	30419
	CMC-EnSpm	33190
LINE	CR1	113
	RTE-BovB	806
	L1-Tx1	1282
	L1	10398
LTR	Pao	99
	Caulimovirus	219
	LTR	822
	Copia	20632
	Gypsy	64897
SINE	ID	81
	L1	1423
	tRNA	3102
Satellite	ctr	88
	Satellite	607
Helitron		3619

## Sheet: Table S5
Table S5: Comparison of repeat content in grass genomes.
The total number of elements and the proportion of nuclear genome assembly masked per repetitive element (in parentheses).
These values only represent repeat-masking results from nuclear chromosome sequences (Chromosomes 1-9 in Setaria species, and 1-10 for Maize and Sorghum).
Element counts were extracted from the RepeatMasker .tbl output file.
	S. viridis ME034V v1.0	S. viridis A10.1 v2.1	S. italica Yugu v2	Sorghum bicolor Ensembl Release 45	Zea mays B73 Ensembl Release 45
SINEs	4,381 (0.24%)	4,066 (0.24%)	4135 (0.15%)	4383 (0.10%)	7821 (0.05%)
LINEs	11,131 (1.43%)	12,078 (1.38%)	11457 (1.36%)	15817 (1.06%)	20342 (0.59%)
LTR elements	70,407 (27.47%)	77,743 (25.77%)	85380 (26.83%)	150,738 (44.37%)	606,753 (70.68%)
DNA elements	93,566 (10.35%)	108,433 (10.67%)	111133 (9.35%)	211,252 (8.40%)	254,952 (4.47%)
Unclassified	52,355 (5.41%)	61,476 (7.15%)	69,288 (7.65%)	57474 (6.08%)	145,586 (4.58%)
Small RNA	3,025 (0.12%)	3,025 (0.12%)	3,804 (0.14%)	4,443 (0.11%)	7,226 (0.05%)
Satellites	641 (0.23%)	893 (0.05%)	106 (0.05%)	3350 (1.47%)	1,705 (0.09%)
Simple repeats	59,743 (0.79%)	64,968 (0.78%)	64,402 (0.79%)	98,588 (0.66%)	132,543 (0.33%)
Low complexity	8,271 (0.11%)	8,279 (0.11%)	8.220 (0.11%)	9,608 (0.08%)	15,944 (0.04%)
Total	303,520 (46.02%)	340,961 (46.11%)	349,713 (46.24%)	555,653 (62.20%)	1,192,872 (80.81%)

## Sheet: Table S6
Table S6: Enrichment tests for increased repeat content and decreased GC content in windows flanking gaps.
Permuted average derived from 1000 randomized shuffles
Bold indicates pvalues < 0.05
Window Size (bp)	Genome Average %RM	Permuted Average %RM	p-value for Repeat Enrichment	Genome Average %GC	Permuted Average %GC	p-value for GC Enrichment
50	53	46	0.194	42.09	46	0.035
100	55	46	0.111	42.96	45.93	0.07
500	58	46	0.08	44.72	46.12	0.242
1000	59	46	0.057	45.03	46.08	0.314
1500	61	46	0.025	44.6	45.96	0.242

## Sheet: Table S7
Table S7: Structural variants in S. viridis genome
Filtered call set for inversions (INV), deletions (DEL), and tandem duplications (DUP) per Delly
Calls were post-filtered to have at precise breakpoint support by at least 5 paired-reads, be less than 5Mb in length, and have a mapping quality score greater than zero
Proportion of samples with genotypes that are homozyous for the reference allele (0/0), heterozygous (0/1), and homozyous for the non-reference/alternate allele (1/1) are provided
Calls with all samples predicted as 0/0 (matching the reference) were ignored, as they were not polymorphic in the sample set
Chromosome	SV Start	SV End	ID	SV Length	Proportion 0/0	Proportion 0/1	Proportion 1/1	Proportion ./.	Filter State	Breakpoint Type	SV Type	MAPQ	CI POS	CI END	Consensus Sequence	SRR1801383	SRR1588052	SRR1588062	SRR1801382	SRR1588059	ERR2696316	ERR2696317	SRR1588060	SRR1588064	SRR1588065	SRR1588025	SRR1588058	SRR1588023	SRR1588054	SRR1588055	SRR4152756	SRR4158248	SRR4151937	SRR4104487	SRR4150503	SRR4102489	SRR4152759	SRR4102567	SRR4158253	SRR4102359	SRR4151933	SRR4116492	SRR4158224	SRR4158169	SRR4151948	SRR4175301	SRR4150499	SRR4151938	SRR4150494
Chr01	1307658	1313848	DEL00000628	6190	0.995763	0	0.00423729	0	PASS	PRECISE	DEL	60	-4,4	-4,4	TCGCCGAAATCAAGGAGTCGATGGTGACGCAGGGATATGATTTAGACAGGTTCGGGCCGCTAGATCGCGTAATGCCCTACATCCTGTGTGTTGTATGCTTGTATTCGATTAATAAATTCAGAAACATATGCCAAGAATTGTTCCTTAACTAAAGATTATATTATTTGTTAAATTACTTTAATACTTGTTCTATA	0/0:0,-1.50447,-18.3993:15:PASS:66:255:77:4:8:1:5:0	0/0:0,-11.7337,-139.294:117:PASS:462:1138:500:2:58:10:39:0	0/0:0,-12.3317,-141.09:123:PASS:459:1220:494:3:66:4:41:0	0/0:0,-9.92703,-115.893:99:PASS:414:1069:487:2:44:5:33:0	0/0:0,-1.80575,-23.0996:18:PASS:102:370:125:3:12:0:6:0	0/0:0,-9.62928,-114.896:96:PASS:384:839:401:2:36:1:32:0	0/0:0,-9.32776,-109.596:93:PASS:393:867:384:2:33:0:31:0	0/0:0,-12.6345,-149.191:126:PASS:451:1174:453:3:52:2:42:0	0/0:0,-14.7382,-172.488:147:PASS:560:1326:581:2:51:2:49:0	0/0:0,-2.40762,-30.3994:24:PASS:86:304:96:3:11:1:8:0	0/0:0,-14.7371,-172.687:147:PASS:604:1404:585:2:66:9:49:0	0/0:0,-15.0359,-174.284:150:PASS:475:1490:539:3:59:3:50:0	0/0:0,-17.4552,-220.695:10000:PASS:983:2452:1115:2:114:6:58:0	0/0:0,-1.80571,-22.8995:18:PASS:94:285:102:3:10:1:6:0	0/0:0,-11.1321,-132.294:111:PASS:452:1296:497:3:57:8:37:0	0/0:0,-7.7975,-83.6707:78:PASS:283:763:273:3:34:2:26:0	0/0:0,-6.31583,-72.5942:63:PASS:293:652:289:2:35:6:21:0	0/0:0,-6.91515,-76.8915:69:PASS:288:655:273:2:34:4:23:0	0/0:0,-9.9234,-114.989:99:PASS:433:1136:412:3:33:2:33:0	0/0:0,-6.61597,-78.7933:66:PASS:340:838:306:3:35:6:22:0	0/0:0,-7.83351,-90.5057:78:PASS:434:787:369:2:36:4:27:0	0/0:0,-7.8168,-87.09:78:PASS:344:892:361:3:41:5:26:0	0/0:0,-7.8228,-93.896:78:PASS:335:621:299:2:34:18:26:0	0/0:0,-7.80952,-88.4827:78:PASS:269:603:263:2:39:9:26:0	0/0:0,-6.49467,-76.572:65:PASS:278:722:284:3:25:12:22:0	0/0:0,-4.73849,-52.722:47:PASS:251:549:266:2:24:1:16:0	0/0:0,-19.5495,-226.483:10000:PASS:715:1557:831:2:81:9:65:0	0/0:0,-6.01715,-70.7965:60:PASS:266:625:271:2:35:5:20:0	0/0:0,-7.94203,-92.0142:79:PASS:255:704:261:3:35:4:27:0	0/0:0,-8.12351,-96.5957:81:PASS:300:720:360:2:36:8:27:0	0/0:0,-6.61981,-79.2972:66:PASS:240:599:243:2:29:3:22:0	0/0:0,-6.01096,-69.4904:60:PASS:289:615:265:2:27:5:20:0	0/0:0,-7.21911,-84.0944:72:PASS:341:731:304:2:39:3:24:0	0/0:0,-7.20905,-81.7843:72:PASS:290:652:282:2:33:3:24:0
Chr01	2250582	2251108	DUP00000581	526	0.995763	0.00423729	0	0	PASS	PRECISE	DUP	60	-2,2	-2,2	TTTCAAGATTACATTTTTTCTTCACTTTGCACATAAGGTCATGTTTTCTTTGCGGTAGATAAAACCATTCTCAGTGGGGGTTTCATCATCAATAAAATGATTACCATGTTTTCCCTTTTACATAGGATCATTCTCAGTGGTGTGGACAATAAAATGACGTGACACATCAGTACAAATGTTTGCACATAAGGTCACGTTTTTT	0/0:0,-2.10641,-25.1992:21:PASS:3:14:21:1:16:0:7:0	0/0:0,-10.2286,-117.594:102:PASS:47:88:50:2:53:0:34:0	0/0:0,-13.46,-151.114:135:PASS:36:111:50:3:60:0:45:0	0/0:0,-10.5262,-120.29:105:PASS:34:77:35:2:39:0:35:0	0/0:0,-2.70836,-33.4991:27:PASS:9:32:13:3:13:0:9:0	0/0:0,-10.2313,-122.796:102:PASS:36:96:33:3:35:0:34:0	0/0:0,-8.42469,-98.4958:84:PASS:33:82:31:3:28:0:28:0	0/0:0,-12.6353,-148.092:126:PASS:42:97:53:2:46:0:42:0	0/0:0,-14.4401,-169.191:144:PASS:47:115:55:2:68:0:48:0	0/0:0,-2.10645,-25.5992:21:PASS:3:17:14:2:12:0:7:0	0/0:0,-12.0328,-139.492:120:PASS:58:123:56:2:58:0:40:0	0/0:0,-14.7397,-169.189:147:PASS:34:109:51:3:51:0:49:0	0/0:0,-16.5489,-199.392:10000:PASS:82:204:97:2:106:0:55:0	0/0:0,-1.50465,-18.4995:15:PASS:6:20:21:1:12:0:5:0	0/0:0,-12.0301,-136.289:120:PASS:35:98:46:2:51:0:40:0	0/0:0,-6.61565,-75.093:66:PASS:20:41:29:2:18:0:22:0	0/0:0,-7.81913,-90.3923:78:PASS:18:58:36:2:43:0:26:0	0/0:0,-4.81313,-56.1966:48:PASS:20:31:26:1:19:0:16:0	0/0:0,-16.2474,-194.192:10000:PASS:42:116:42:3:52:0:54:0	0/0:0,-7.52199,-89.1962:75:PASS:27:56:33:2:29:0:25:0	0/0:0,-15.0408,-174.589:150:PASS:43:100:52:2:76:0:50:0	0/0:0,-8.72265,-101.493:87:PASS:20:56:31:2:46:0:29:0	0/0:0,-9.62917,-117.096:96:PASS:29:65:37:2:43:0:32:0	0/0:0,-7.219,-83.1943:72:PASS:21:50:26:2:26:0:24:0	0/0:0,-8.12444,-97.0966:81:PASS:27:49:33:2:30:0:27:0	0/0:0,-6.01363,-69.093:60:PASS:11:36:33:2:22:0:20:0	0/0:0,-14.1424,-168.494:141:PASS:40:124:71:2:70:0:47:0	0/0:0,-6.91483,-79.7911:69:PASS:25:60:28:2:26:0:23:0	0/0:0,-5.71745,-69.1979:57:PASS:22:58:26:2:23:0:19:0	0/0:0,-6.61972,-79.1971:66:PASS:16:52:30:2:27:0:22:0	0/0:0,-4.80902,-52.3925:48:PASS:16:41:23:2:17:0:16:0	0/0:0,-7.22109,-85.8964:72:PASS:28:45:23:2:26:0:24:0	0/0:0,-7.22183,-86.4971:72:PASS:29:53:25:2:42:0:24:0	0/0:0,-7.52282,-90.9971:75:PASS:19:50:28:2:16:0:25:0
Chr01	2588330	4095382	DUP00000658	1507052	0.838983	0.161017	0	0	PASS	PRECISE	DUP	60	-6,6	-6,6	AGACCACTCACCCAGAAACTCCAAGTACATCCAATCAGATTTCATAACCAACTTCCATAAACCATACACATACATGCAGCAACGAATGGCAAAAGCCAGTCATTTTAGGTTCTCTGCACAATTTACAATCCTAGCCAAACAAGTTAAATGAGAATACGAATTGCAGTCATTTCTGGTTCAGTTTTTCATCCTTTTCCTACTGTCTAGAGAGTAGAGATTGATTTCAGTCTTGC	0/1:-11.3977,0,-10.032:100:PASS:18116:38218:20948:2:10:4:4:7	0/1:-64.7324,0,-141.34:10000:PASS:96055:192280:108091:2:29:15:49:37	0/1:-70.6331,0,-126.606:10000:PASS:99531:200661:110952:2:33:27:47:45	0/1:-74.9419,0,-106.545:10000:PASS:85438:175824:95884:2:25:17:38:42	0/1:-18.193,0,-12.5952:126:PASS:26233:54053:30414:2:9:7:5:8	0/1:-28.1478,0,-102.786:10000:PASS:73797:146862:83031:2:22:7:35:27	0/1:-74.4277,0,-99.9126:10000:PASS:73989:147554:83583:2:17:7:36:50	0/1:-63.7297,0,-130.183:10000:PASS:92968:188257:104570:2:27:21:46:44	0/0:0,-13.2189,-150.774:132:PASS:129414:266472:137438:2:59:0:44:0	0/0:0,-1.5047,-18.7995:15:PASS:26483:56179:28795:2:11:0:5:0	0/1:-118.651,0,-152.241:10000:PASS:119111:239302:134887:2:31:19:54:53	0/1:-70.5482,0,-120.576:10000:PASS:114634:233112:129574:2:33:20:44:54	0/1:-78.6678,0,-164.074:10000:PASS:203745:418114:240079:2:57:31:58:43	0/1:-6.72524,0,-8.52535:67:PASS:22021:45159:25120:2:7:5:4:4	0/1:-63.1286,0,-137.408:10000:PASS:101903:207498:115014:2:28:20:48:44	0/0:0,-6.01332,-67.5927:60:PASS:69159:129167:70311:2:32:0:20:0	0/0:0,-4.81294,-54.9965:48:PASS:65272:137053:69841:2:37:0:16:0	0/0:0,-6.90165,-74.378:69:PASS:60981:130410:66923:2:36:0:23:0	0/0:0,-13.5343,-155.688:135:PASS:102615:200971:115568:2:45:0:45:0	0/1:-46.3661,0,-56.6599:10000:PASS:63550:124516:69749:2:19:31:19:18	0/0:0,-9.02494,-104.694:90:PASS:106026:203595:109979:2:45:0:30:0	0/0:0,-6.61426,-74.3916:66:PASS:82787:167568:85432:2:44:0:22:0	0/0:0,-7.51991,-88.0942:75:PASS:72796:143130:83523:2:30:0:25:0	0/0:0,-5.71439,-65.9948:57:PASS:57703:123173:63431:2:38:0:19:0	0/0:0,-6.92006,-81.3964:69:PASS:65816:123660:72985:2:33:0:23:0	0/0:0,-5.11519,-60.8977:51:PASS:54815:101962:55739:2:27:0:17:0	0/0:0,-18.9536,-222.689:10000:PASS:152521:283857:167062:2:68:0:63:0	0/0:0,-6.91203,-76.9883:69:PASS:61491:115544:67182:2:27:0:23:0	0/0:0,-5.41632,-65.1978:54:PASS:61887:133047:65421:2:29:0:18:0	0/0:0,-6.31884,-74.7972:63:PASS:70943:154895:75337:2:42:0:21:0	0/0:0,-6.91792,-80.1942:69:PASS:53327:115338:58436:2:29:0:23:0	0/0:0,-6.6196,-78.8969:66:PASS:58791:125582:63627:2:34:0:22:0	0/1:-30.2565,0,-85.4319:10000:PASS:72231:144848:75173:2:10:10:27:18	0/0:0,-6.31836,-75.2967:63:PASS:62051:123702:62279:2:25:0:21:0
Chr01	3148063	3151013	DEL00001465	2950	0.978814	0.0211864	0	0	PASS	PRECISE	DEL	60	-3,3	-3,3	AGCATCAAGTTTTAACCTTGCTCGCCTGTATAGAAACTGGGATTGCTGGATAGGAATCTGAAATCTGAACAACCAATTACTGAGTTCCAGTTACTTGATTTCCGGTTCCGTGTCCATAACTGCATGGAAACAAGCTTTGTGTTATTGGTTACTCATGACCATTTTTCCTTGGCAGATCTCAATGTATAAGGAAGACCAAATCAGAGACATCATAAGAGCTTTTGCTCTA	0/0:0,-3.00853,-36.8982:30:PASS:51:110:16:3:17:0:10:0	0/0:0,-11.4272,-134.188:114:PASS:215:414:69:3:46:0:38:0	0/0:0,-12.334,-145.992:123:PASS:248:443:90:3:56:1:41:0	0/0:0,-10.5301,-125.294:105:PASS:246:449:79:3:55:0:35:0	0/0:0,-3.00922,-37.1989:30:PASS:80:130:29:2:23:0:10:0	0/0:0,-7.52303,-90.3973:75:PASS:171:278:60:2:27:0:25:0	0/0:0,-12.6382,-150.895:126:PASS:179:311:55:3:37:1:42:0	0/0:0,-12.028,-144.887:120:PASS:269:439:70:3:54:0:40:0	0/0:0,-15.0413,-175.89:150:PASS:258:525:182:2:64:0:50:0	0/0:0,-2.40773,-30.8995:24:PASS:85:138:55:2:21:0:8:0	0/0:0,-16.2474,-194.492:10000:PASS:260:465:93:3:64:0:54:0	0/0:0,-16.6852,-200.228:10000:PASS:327:554:101:3:75:0:56:0	0/0:0,-12.9403,-162.096:129:PASS:510:808:147:2:100:0:43:0	0/0:0,-2.1067,-26.6995:21:PASS:90:107:18:2:17:0:7:0	0/0:0,-12.9355,-153.591:129:PASS:278:481:84:3:68:0:43:0	0/0:0,-9.32663,-110.695:93:PASS:177:316:120:2:43:0:31:0	0/0:0,-8.42267,-99.6938:84:PASS:146:286:131:2:44:0:28:0	0/0:0,-8.12263,-94.2948:81:PASS:175:285:105:2:41:0:27:0	0/0:0,-8.4243,-100.095:84:PASS:236:356:49:2:37:0:28:0	0/0:0,-5.92249,-103.19:59:PASS:163:292:63:3:40:4:31:1	0/0:0,-9.62648,-113.994:96:PASS:153:359:169:2:52:0:32:0	0/0:0,-10.5251,-120.089:105:PASS:208:353:160:2:51:0:35:0	0/0:0,-5.7159,-67.7963:57:PASS:130:221:41:3:27:0:19:0	0/0:0,-5.41601,-64.6975:54:PASS:123:279:89:3:38:1:18:0	0/0:0,-9.32764,-112.596:93:PASS:180:283:51:2:42:0:31:0	0/0:0,-6.3191,-75.7975:63:PASS:128:232:105:2:37:0:21:0	0/0:0,-15.3449,-184.292:154:PASS:378:636:100:3:76:0:51:0	0/0:0,-6.01748,-72.4969:60:PASS:149:252:33:3:31:0:20:0	0/0:0,-8.12158,-95.8938:81:PASS:174:307:98:2:43:0:27:0	0/0:0,-9.92946,-118.595:99:PASS:159:307:131:2:49:0:33:0	0/0:0,-6.61932,-79.3967:66:PASS:132:252:116:2:39:0:22:0	0/0:0,-6.92125,-84.1976:69:PASS:140:290:88:3:39:0:23:0	0/0:0,-9.02634,-107.095:90:PASS:181:315:141:2:51:0:30:0	0/0:0,-6.92068,-83.397:69:PASS:134:274:112:2:38:0:23:0
Chr01	3769138	3775201	DEL00001777	6063	0.978814	0.0211864	0	0	PASS	PRECISE	DEL	60	-7,7	-7,7	TGTTAGATGTTTCTATTTTCTAAGAGCAACATGCATGCATAGTAGTAGTTAATTCATAGTATCAAGTGCAAGTAGCTGTTGTTGCAGGCTAGTGGAGTTCGGTTTGTTTTGCAGGCTAGATCTCATCTTTTACTCACTGGATTTGCCTGACCAATTCCATTAAAAGATCACCGGACAATAGTCAAGCATGGTCCAACTTTGAGTAAAACATTATGG	0/0:0,-2.40775,-30.9995:24:PASS:97:188:124:2:8:0:8:0	0/0:0,-12.903,-154.859:129:PASS:459:1006:467:2:47:0:43:0	0/0:0,-12.6143,-148.271:126:PASS:480:1125:567:2:43:0:42:0	0/0:0,-11.7338,-136.394:117:PASS:419:960:476:2:35:0:39:0	0/0:0,-1.80573,-23.1996:18:PASS:129:327:157:2:9:0:6:0	0/0:0,-8.12467,-97.4969:81:PASS:297:762:339:2:20:0:27:0	0/0:0,-9.92994,-117.596:99:PASS:316:861:347:3:29:0:33:0	0/0:0,-10.8325,-132.095:108:PASS:447:1045:506:2:35:0:36:0	0/0:0,-15.3433,-182.991:154:PASS:554:1226:558:2:67:0:51:0	0/0:0,-1.80578,-22.9996:18:PASS:120:292:116:2:13:0:6:0	0/0:0,-14.124,-160.976:141:PASS:571:1233:641:2:37:0:47:0	0/0:0,-15.3345,-176.682:154:PASS:475:1311:662:2:40:0:51:0	0/0:0,-12.6395,-158.496:126:PASS:939:2268:999:2:68:0:42:0	0/0:0,-1.8053,-21.9991:18:PASS:86:203:130:2:9:0:6:0	0/0:0,-12.8421,-152.898:128:PASS:446:1122:589:2:32:0:43:0	0/0:0,-8.12217,-94.0944:81:PASS:230:677:380:2:32:0:27:0	0/0:0,-5.41639,-64.4978:54:PASS:286:652:287:2:26:0:18:0	0/0:0,-6.91999,-81.0963:69:PASS:284:615:330:2:40:0:23:0	0/0:0,-8.42157,-96.9927:84:PASS:532:1062:472:2:37:0:28:0	0/0:0,-4.52256,-88.0949:45:PASS:474:1074:316:3:20:1:26:1	0/0:0,-8.12272,-95.8949:81:PASS:346:815:249:3:33:0:27:0	0/0:0,-8.42176,-96.4929:84:PASS:357:780:378:2:47:1:28:0	0/0:0,-4.81493,-59.7985:48:PASS:255:507:201:2:14:0:16:0	0/0:0,-4.81339,-56.1969:48:PASS:279:530:249:2:30:0:16:0	0/0:0,-8.12479,-98.497:81:PASS:332:639:364:2:23:0:27:0	0/0:0,-5.4138,-63.6953:54:PASS:203:461:245:2:13:0:18:0	0/0:0,-19.2549,-228.189:10000:PASS:708:1564:835:2:58:0:64:0	0/0:0,-8.12478,-97.497:81:PASS:282:621:296:2:23:0:27:0	0/0:0,-5.41122,-60.6927:54:PASS:288:586:330:2:33:0:18:0	0/0:0,-7.21895,-84.2942:72:PASS:323:675:364:2:40:0:24:0	0/0:0,-5.41551,-63.497:54:PASS:266:566:248:2:27:0:18:0	0/0:0,-8.12361,-96.4958:81:PASS:287:590:291:2:42:0:27:0	0/0:0,-6.92045,-83.1968:69:PASS:262:607:310:2:22:0:23:0	0/0:0,-7.52095,-89.7952:75:PASS:294:549:294:2:35:1:25:0
Chr01	3797377	3804775	DEL00001795	7398	0.995763	0.00423729	0	0	PASS	PRECISE	DEL	60	-4,4	-4,4	ATGTCCTTTTTATTTGGAATATTAATGAAGCACATCTCTTCAAAATGTGAAATGTATTGTCTTACCAGCCCCTTTGCCAAAAACAATCAAGATGATCATATACAGTAGCGAGATCCAATTACATAGAGATATCCTGACACTGCACCAAGCAGTTCCAAATGTAATGAGACTAGATAC	0/0:0,-2.1067,-26.7995:21:PASS:136:312:140:2:23:0:7:0	0/0:0,-12.6149,-148.572:126:PASS:570:1169:567:2:69:0:42:0	0/0:0,-10.8314,-129.794:108:PASS:646:1368:663:2:67:0:36:0	0/0:0,-10.2277,-119.593:102:PASS:545:1131:514:2:66:0:34:0	0/0:0,-3.00978,-39.2995:30:PASS:228:368:190:2:20:0:10:0	0/0:0,-9.027,-106.896:90:PASS:447:884:461:2:35:1:30:0	0/0:0,-9.93044,-119.396:99:PASS:509:894:428:2:41:1:33:0	0/0:0,-11.4257,-134.687:114:PASS:638:1301:542:2:67:0:38:0	0/0:0,-12.6377,-152.494:126:PASS:759:1369:669:2:70:1:42:0	0/0:0,-3.61135,-45.899:36:PASS:169:343:195:2:27:0:12:0	0/0:0,-18.958,-233.293:10000:PASS:737:1583:723:2:94:0:63:0	0/0:0,-16.8506,-205.393:10000:PASS:750:1467:742:2:80:0:56:0	0/0:0,-14.1387,-180.29:141:PASS:1292:2604:1268:2:127:1:47:0	0/0:0,-2.10687,-27.6997:21:PASS:175:355:177:2:25:0:7:0	0/0:0,-14.7432,-177.993:147:PASS:666:1243:691:2:82:1:49:0	0/0:0,-9.62308,-109.49:96:PASS:477:803:407:2:57:0:32:0	0/0:0,-9.62376,-109.991:96:PASS:403:716:384:2:44:0:32:0	0/0:0,-8.12324,-97.1954:81:PASS:359:664:363:2:44:0:27:0	0/0:0,-14.7434,-178.193:147:PASS:699:1331:661:2:67:0:49:0	0/0:0,-11.1341,-135.296:111:PASS:424:767:420:2:47:0:37:0	0/0:0,-10.5315,-126.395:105:PASS:568:1292:590:2:68:0:35:0	0/0:0,-10.2244,-113.789:102:PASS:480:894:459:2:63:0:34:0	0/0:0,-6.01823,-73.4976:60:PASS:434:1033:399:2:34:0:20:0	0/0:0,-6.01829,-72.2977:60:PASS:323:599:385:2:38:0:20:0	0/0:0,-9.32747,-110.896:93:PASS:399:907:422:2:51:1:31:0	0/0:0,-6.61995,-79.7973:66:PASS:335:635:325:2:32:0:22:0	0/0:0,-16.8497,-202.192:10000:PASS:890:1806:907:2:94:0:56:0	0/0:0,-6.31904,-75.6974:63:PASS:336:772:326:2:39:0:21:0	0/0:0,-9.026,-107.095:90:PASS:375:697:372:2:46:0:30:0	0/0:0,-9.92829,-117.694:99:PASS:410:824:422:2:65:0:33:0	0/0:0,-7.82309,-93.7963:78:PASS:319:647:327:2:42:0:26:0	0/0:0,-5.71479,-67.0952:57:PASS:368:683:319:2:35:0:19:0	0/0:0,-8.72573,-103.996:87:PASS:383:795:412:2:49:0:29:0	0/0:0,-6.01834,-72.6977:60:PASS:389:706:366:2:34:1:20:0
Chr01	6004151	6011216	DEL00002633	7065	0.978814	0.0211864	0	0	PASS	PRECISE	DEL	60	-4,4	-4,4	TCATGTTTGTGTGCAGTCTCACTATAGTTGCACCACTTGTCGCTGATCAGCAATTCTGCTTCGGGTTCCATTCCAATGATCTCACTCTGTCTGCTCTCACTCCCAATCTAATCCATGCTATCTCACATGGCTAGCTTGAGAAACTTGCATAATTATCAGTTCCCTTGATCTTCTACCCAAATGTGCTAGTATGATCACAGGACATGTA	0/0:0,-1.50484,-19.2997:15:PASS:114:224:61:3:12:0:5:0	0/0:0,-12.9366,-154.792:129:PASS:525:1104:320:3:70:0:43:0	0/0:0,-12.6385,-154.795:126:PASS:612:1343:375:3:71:0:42:0	0/0:0,-11.1344,-137.096:111:PASS:458:979:292:3:54:0:37:0	0/0:0,-2.10636,-25.9991:21:PASS:177:361:95:3:20:0:7:0	0/0:0,-10.8331,-130.196:108:PASS:364:814:271:3:40:0:36:0	0/0:0,-8.72666,-104.597:87:PASS:394:826:261:3:38:2:29:0	0/0:0,-13.5402,-165.694:135:PASS:541:1236:384:3:64:0:45:0	0/0:0,-12.9287,-152.284:129:PASS:706:1360:627:2:69:0:43:0	0/0:0,-2.40781,-31.3996:24:PASS:151:396:127:3:19:0:8:0	0/0:0,-13.54,-161.994:135:PASS:679:1467:453:3:80:1:45:0	0/0:0,-14.4413,-172.092:144:PASS:708:1455:427:3:84:1:48:0	0/0:0,-13.5375,-164.791:135:PASS:1186:2459:669:3:114:0:45:0	0/0:0,-1.50486,-19.4997:15:PASS:128:323:107:3:20:0:5:0	0/0:0,-12.3367,-149.094:123:PASS:558:1233:394:3:66:0:41:0	0/0:0,-8.12219,-94.0944:81:PASS:387:770:371:2:46:0:27:0	0/0:0,-7.2208,-84.0961:72:PASS:368:657:233:2:40:0:24:0	0/0:0,-6.61742,-76.9948:66:PASS:297:698:306:2:43:0:22:0	0/0:0,-12.0338,-142.693:120:PASS:709:1301:614:2:40:0:40:0	0/0:0,-7.32219,-111.786:73:PASS:337:697:365:2:41:2:34:1	0/0:0,-11.4225,-132.483:114:PASS:602:987:247:2:50:0:38:0	0/0:0,-7.21906,-83.3943:72:PASS:442:919:390:2:48:0:24:0	0/0:0,-8.72643,-106.397:87:PASS:414:724:478:2:41:0:29:0	0/0:0,-7.2206,-85.4959:72:PASS:297:662:315:2:42:0:24:0	0/0:0,-8.72605,-104.696:87:PASS:390:766:345:2:45:0:29:0	0/0:0,-5.71513,-65.4956:57:PASS:289:606:317:2:34:0:19:0	0/0:0,-19.2577,-231.692:10000:PASS:809:1813:820:2:89:0:64:0	0/0:0,-7.52199,-89.2962:75:PASS:340:728:323:2:44:0:25:0	0/0:0,-6.91872,-78.495:69:PASS:375:651:266:2:36:0:23:0	0/0:0,-6.61799,-76.5953:66:PASS:347:806:328:2:42:0:22:0	0/0:0,-6.31266,-70.091:63:PASS:341:634:286:2:32:0:21:0	0/0:0,-6.31892,-75.9973:63:PASS:328:697:282:2:39:0:21:0	0/0:0,-8.1249,-98.0971:81:PASS:388:765:231:2:47:0:27:0	0/0:0,-6.61927,-79.7966:66:PASS:346:697:379:2:33:1:22:0
Chr01	6456004	6647297	INV00003547	191293	0.936441	0.0635593	0	0	PASS	PRECISE	INV	42	-5,5	-5,5	AACAAAGGATATAAGGCAACAGCGGAAGCCGCATATCATCCAAATCCTGAGGCATATTGTGAGTTTGTCATGCAGTCCTTGCCTGCGGTAAGATCCACTGTTAAGTCACTGCTGCAAGCCATGTTATTATGTTTCTTTCAAAATTCTGAGCACATATATGATAAAGATGCCATGTATCATTTGTCTGTGTTTTCTTATCTTATA	0/1:-10.6959,0,-2.79602:28:PASS:2173:1124:2956:0:10:5:1:3	0/1:-123.714,0,-24.1768:10000:PASS:11693:6882:15310:1:30:15:12:39	0/1:-141.443,0,-51.2395:10000:PASS:11923:7013:15935:1:42:32:21:45	0/1:-90.254,0,-61.7561:10000:PASS:10263:6676:13787:1:35:19:22:30	0/1:-19.187,0,-23.6871:10000:PASS:3282:1628:4251:0:15:4:7:6	0/1:-100.75,0,-50.1519:10000:PASS:9356:5839:11811:1:21:11:18:32	0/1:-142.64,0,-36.4439:10000:PASS:9481:6062:11845:1:19:17:15:45	0/1:-163.733,0,-45.3354:10000:PASS:11350:7010:15196:1:33:18:19:50	0/0:0,-12.56,-147.417:126:PASS:16150:30246:16535:2:65:0:42:0	0/0:0,-2.1065,-26.0993:21:PASS:3313:5307:3622:2:18:0:7:0	0/1:-106.649,0,-63.8517:10000:PASS:14592:8853:18977:1:37:19:24:35	0/1:-101.446,0,-75.608:10000:PASS:13997:7917:18706:0:50:24:26:34	0/1:-178.025,0,-58.9334:10000:PASS:25785:14257:33247:0:78:45:21:53	0/1:-16.991,0,-12.491:125:PASS:2724:1302:3594:0:12:3:4:5	0/1:-134.744,0,-44.5461:10000:PASS:12205:6894:16344:0:43:16:18:43	0/0:0,-7.8217,-90.6949:78:PASS:9152:15416:10154:2:49:0:26:0	0/0:0,-6.0169,-70.2963:60:PASS:8881:14648:9421:2:39:0:20:0	0/0:0,-6.62005,-80.0974:66:PASS:7803:14124:8513:2:41:1:22:0	0/0:0,-16.55,-200.193:10000:PASS:14211:17700:15978:1:70:1:55:0	0/0:0,-3.91215,-47.6988:39:PASS:6978:4272:8510:1:34:11:13:0	0/0:0,-9.62673,-114.694:96:PASS:13400:19947:14443:1:48:0:32:0	0/0:0,-9.3272,-110.195:93:PASS:10585:18429:11526:2:55:0:31:0	0/0:0,-2.70788,-32.1986:27:PASS:8380:4374:10395:0:32:8:9:0	0/0:0,-6.31895,-75.7973:63:PASS:7785:13739:9024:2:38:0:21:0	0/0:0,-10.5299,-126.994:105:PASS:8886:13517:9384:1:41:0:35:0	0/0:0,-6.31687,-73.2952:63:PASS:7196:12479:7892:2:43:0:21:0	0/0:0,-19.8535,-235.386:10000:PASS:21684:37589:24476:2:94:0:66:0	0/0:0,-7.82067,-93.8939:78:PASS:8281:12350:8585:1:46:0:26:0	0/0:0,-7.21862,-82.2939:72:PASS:8098:12130:8625:1:37:0:24:0	0/0:0,-10.8279,-125.391:108:PASS:9480:16294:10297:2:58:0:36:0	0/0:0,-6.30733,-72.8857:63:PASS:7196:10631:7570:1:36:0:21:0	0/0:0,-8.12306,-95.8952:81:PASS:7819:11146:8079:1:47:0:27:0	0/0:0,-7.44752,-87.2218:74:PASS:9531:15958:10532:2:47:0:25:0	0/0:0,-6.0182,-72.2976:60:PASS:8361:14261:8923:2:36:0:20:0
Chr01	6678345	6687776	DEL00002879	9431	0.95339	0	0.0466102	0	PASS	PRECISE	DEL	55	-2,2	-2,2	ATTTTGTAGCCAAATTTCTTTTGCCGCTATTATCTTTCTTTTTCCTCGGTGTGCCATGTTCTATATAAGCCGGTCATACTAGCCATTGCAGTTCTGTTATGTGCTTGTCAGAACTTTCGACACAGTTCAAATAAAACAGCTGGAACCCTTTGCTGGAAGTTACTA	0/0:0,-1.50399,-17.2988:15:PASS:129:464:193:3:9:0:5:0	0/0:0,-9.32366,-106.292:93:PASS:788:2796:770:4:64:1:31:0	0/0:0,-11.424,-130.485:114:PASS:825:2943:853:4:60:1:38:0	0/0:0,-10.4501,-117.314:105:PASS:650:2620:676:4:55:1:35:0	0/0:0,-1.80548,-22.1993:18:PASS:213:696:241:3:12:0:6:0	0/0:0,-6.92106,-82.8974:69:PASS:545:2149:586:4:29:1:23:0	0/0:0,-8.72684,-105.197:87:PASS:608:2179:596:4:35:0:29:0	0/0:0,-13.5382,-158.592:135:PASS:758:2941:787:4:56:2:45:0	0/0:0,-12.9291,-145.685:129:PASS:946:1727:932:2:60:0:43:0	0/0:0,-1.80563,-22.2995:18:PASS:187:345:223:2:11:0:6:0	0/0:0,-12.6343,-146.891:126:PASS:1005:3566:909:4:65:2:42:0	0/0:0,-14.1072,-159.759:141:PASS:893:3422:955:4:69:0:47:0	0/0:0,-16.4814,-191.725:10000:PASS:1563:5637:1708:3:125:0:55:0	0/0:0,-1.50435,-17.4992:15:PASS:168:571:233:3:9:0:5:0	0/0:0,-12.6311,-145.188:126:PASS:795:3090:873:4:55:0:42:0	0/0:0,-6.48965,-69.767:65:PASS:497:1172:548:2:39:0:22:0	0/0:0,-7.51807,-87.6923:75:PASS:461:1053:473:2:41:0:25:0	0/0:0,-6.31576,-71.0941:63:PASS:395:1188:435:3:35:1:21:0	0/0:0,-15.3443,-180.792:154:PASS:844:1755:828:2:71:0:51:0	1/1:-57.5936,-2.0131,0:20:PASS:473:467:486:1:4:33:1:18	0/0:0,-10.2267,-117.992:102:PASS:761:1905:493:3:55:0:34:0	0/0:0,-7.81792,-87.3911:78:PASS:537:1341:610:2:59:1:26:0	1/1:-161.694,-13.2396,0:132:PASS:559:962:500:2:0:53:0:44	0/0:0,-7.22161,-86.5969:72:PASS:407:1237:445:3:39:0:24:0	0/0:0,-6.01604,-71.9954:60:PASS:494:890:530:2:35:0:20:0	0/0:0,-5.71048,-62.9909:57:PASS:419:866:421:2:23:0:19:0	0/0:0,-18.3525,-219.29:10000:PASS:1137:3940:1087:4:95:1:61:0	0/0:0,-6.31817,-73.7965:63:PASS:459:951:481:2:30:0:21:0	0/0:0,-5.41601,-63.7975:54:PASS:468:1167:470:2:31:0:18:0	0/0:0,-9.02052,-103.19:90:PASS:483:1128:520:2:45:0:30:0	0/0:0,-5.41661,-65.5981:54:PASS:393:1004:442:2:27:0:18:0	0/0:0,-6.92119,-83.7975:69:PASS:428:748:480:2:36:0:23:0	0/0:0,-8.42136,-95.2925:84:PASS:490:1215:551:2:52:0:28:0	0/0:0,-6.92105,-82.9974:69:PASS:441:1002:415:2:34:0:23:0
Chr01	8734676	8735165	DUP00001880	489	0.991525	0.00847458	0	0	PASS	PRECISE	DUP	60	-5,5	-5,5	ATGTTCTGAACTACTGGTATCTAACATATTTGTAGTTTAAGCAAGCAATGGCCTACATTCCCTCTCATCCAAAACACACAAAGCAGTATGTGTTACCTTACAGTAATGTAGATAACCATAACTGACCTAACTAATTCAAAAGAAACAATTCAGAGAAAGAAGAACCAAGACATACTTATTAACTGATTATACCGAAC	0/0:0,-1.50492,-19.8998:15:PASS:1760:3155:1144:2:12:0:5:0	0/0:0,-12.0285,-139.187:120:PASS:9033:27671:16512:2:69:0:40:0	0/0:0,-16.8465,-202.789:10000:PASS:15353:31505:15747:2:88:0:56:0	0/0:0,-13.2376,-154.992:132:PASS:12124:25826:11567:2:64:0:44:0	0/0:0,-3.91259,-50.3992:39:PASS:4351:9969:4000:2:36:0:13:0	0/0:0,-9.02697,-106.296:90:PASS:10493:20954:9980:2:41:0:30:0	0/0:0,-12.6385,-151.995:126:PASS:11821:23533:12590:2:47:0:42:0	0/0:0,-12.0359,-145.195:120:PASS:11344:23960:11773:2:55:0:40:0	0/0:0,-17.75,-212.389:10000:PASS:14506:35928:17172:2:81:0:59:0	0/0:0,-3.91248,-50.6991:39:PASS:3706:8219:2925:2:30:0:13:0	0/0:0,-12.9031,-154.859:129:PASS:14053:27256:15835:2:68:0:43:0	0/0:0,-16.2419,-189.386:10000:PASS:17724:32357:16396:2:86:0:54:0	0/0:0,-17.7547,-222.594:10000:PASS:18747:37248:20464:2:140:0:59:0	0/0:0,-2.40771,-30.8995:24:PASS:3073:5333:2234:2:21:0:8:0	0/0:0,-16.5455,-199.089:10000:PASS:15043:29059:15007:2:80:0:55:0	0/0:0,-5.41346,-61.9949:54:PASS:8359:18866:8170:2:56:0:18:0	0/0:0,-3.61092,-43.4986:36:PASS:9156:15064:7573:2:41:0:12:0	0/0:0,-8.72494,-102.395:87:PASS:6555:13824:7274:2:39:0:29:0	0/0:0,-9.32906,-114.197:93:PASS:20525:31366:10794:2:56:0:31:0	0/0:0,-7.8229,-93.1961:78:PASS:9040:17490:8124:2:50:0:26:0	0/0:0,-14.1413,-168.193:141:PASS:14572:29527:15922:2:78:0:47:0	0/0:0,-10.2269,-118.292:102:PASS:9948:19986:9589:2:59:0:34:0	0/0:0,-8.72637,-106.497:87:PASS:10952:17208:9512:2:49:0:29:0	0/0:0,-6.31761,-73.696:63:PASS:6685:17222:6749:3:40:0:21:0	0/0:0,-7.52139,-89.1956:75:PASS:9722:16939:7736:2:41:0:25:0	0/0:0,-6.3178,-74.5962:63:PASS:6606:15387:6356:2:37:0:21:0	0/0:0,-10.2313,-123.796:102:PASS:20151:40856:20151:2:105:0:34:0	0/0:0,-8.12411,-96.4963:81:PASS:7675:16309:8828:2:44:0:27:0	0/0:0,-6.92142,-84.2977:69:PASS:7205:15898:8089:2:46:0:23:0	0/0:0,-8.42537,-101.197:84:PASS:8878:16449:7751:2:54:0:28:0	0/0:0,-7.52168,-88.6959:75:PASS:8580:14881:6737:2:40:0:25:0	0/0:0,-3.31,-39.4987:33:PASS:7617:13886:5299:2:37:0:11:0	0/0:0,-4.21306,-51.1986:42:PASS:6672:20126:8016:3:51:0:14:0	0/0:0,-8.42624,-103.197:84:PASS:7233:16235:9776:2:45:0:28:0
Chr01	10007099	10015092	DUP00002351	7993	0.991525	0.00847458	0	0	PASS	PRECISE	DUP	60	-3,3	-3,3	TTGAGATAGGTACAAGCTTATGTCCATAGCCTTTTTTTGTTTCTTGAATGTCATCATTGCGCAACTTCTGTTTTTTTGCTATGGCCCCCTTTTGAAAGTTCTTCTTATGTCAGTACTGGACCAGCACCATGTTCAACATCAAGATCATCGGGACGGTGAACGCGCTGGCGTCGGGCTGGGG	0/0:0,-1.80574,-22.8996:18:PASS:108:323:302:2:20:0:6:0	0/0:0,-18.0481,-209.986:10000:PASS:617:1819:1115:2:99:0:60:0	0/0:0,-21.3566,-251.183:10000:PASS:649:1722:1337:2:101:0:71:0	0/0:0,-15.9446,-185.39:157:PASS:572:1628:1050:2:87:0:53:0	0/0:0,-3.91198,-48.5986:39:PASS:142:440:423:2:32:0:13:0	0/0:0,-18.3554,-218.793:10000:PASS:499:1572:837:2:63:0:61:0	0/0:0,-15.3472,-185.195:154:PASS:489:1534:880:2:63:0:51:0	0/0:0,-18.2735,-207.911:10000:PASS:598:1755:1222:2:86:0:61:0	0/0:0,-18.0317,-207.97:10000:PASS:628:1558:1010:2:81:0:60:0	0/0:0,-2.70828,-33.599:27:PASS:119:270:261:1:16:0:9:0	0/0:0,-22.8604,-262.682:10000:PASS:800:2243:1350:2:104:0:76:0	0/0:0,-21.0452,-242.073:10000:PASS:709:2083:1464:2:97:0:70:0	0/0:0,-28.2401,-333.643:10000:PASS:1243:4016:2396:2:210:0:94:0	0/0:0,-3.61125,-45.4989:36:PASS:110:317:333:1:22:0:12:0	0/0:0,-19.248,-224.982:10000:PASS:606:1861:1326:2:99:0:64:0	0/0:0,-6.61731,-74.6946:66:PASS:403:775:480:2:39:0:22:0	0/0:0,-5.71514,-66.9956:57:PASS:356:699:423:2:30:0:19:0	0/0:0,-14.7375,-168.787:147:PASS:347:906:707:2:69:16:49:0	0/0:0,-25.5644,-295.377:10000:PASS:613:1631:1279:2:102:14:85:0	0/0:0,-4.81357,-56.3971:48:PASS:384:775:449:2:30:0:16:0	0/0:0,-17.4439,-196.784:10000:PASS:641:1329:938:2:76:0:58:0	0/0:0,-6.91847,-79.0948:69:PASS:485:882:536:2:40:0:23:0	0/0:0,-13.8365,-166.489:138:PASS:346:890:639:2:59:0:46:0	0/0:0,-6.61519,-73.2925:66:PASS:354:693:376:2:31:0:22:0	0/0:0,-11.1314,-130.893:111:PASS:352:1108:812:2:57:0:37:0	0/0:0,-5.71613,-66.7966:57:PASS:291:622:392:2:29:0:19:0	0/0:0,-33.0939,-389.081:10000:PASS:1075:2428:1689:2:168:0:110:0	0/0:0,-12.0276,-135.886:120:PASS:354:1051:689:2:69:6:40:0	0/0:0,-12.0282,-136.587:120:PASS:337:993:727:2:58:13:40:0	0/0:0,-7.81533,-87.9886:78:PASS:438:775:475:2:39:0:26:0	0/0:0,-9.62076,-109.488:96:PASS:320:862:633:2:49:0:32:0	0/0:0,-12.9276,-146.183:129:PASS:356:940:687:2:75:12:43:0	0/0:0,-6.61997,-79.0973:66:PASS:393:764:468:2:42:0:22:0	0/0:0,-6.61737,-75.7947:66:PASS:313:705:390:2:33:0:22:0
Chr01	11357311	11371948	DEL00005022	14637	0.995763	0	0.00423729	0	PASS	PRECISE	DEL	60	-2,2	-2,2	ACATTTTGTGGTGCAGGCTAGAATGATGGTTTTATTCATTTCCTTATTTTCTGTTCTTTCTTTGTTTTTCATCTCGTTCTGTTCATAAGCTTAGAAACGTAACCAAACGTAACCAAAGGCACCTCTTTAAATTCATGGTAGCCATGTGTGAAGAGCTGAGAAATAATGAGCATACATAACTTACTTACTAGAGAAAAGTTCA	0/0:0,-1.80568,-22.7995:18:PASS:217:395:253:2:14:1:6:0	0/0:0,-12.3326,-143.59:123:PASS:1086:2049:1110:2:40:3:41:0	0/0:0,-15.6452,-187.292:157:PASS:1149:2162:1177:2:48:11:52:0	0/0:0,-12.9353,-152.391:129:PASS:1013:2035:1034:2:46:2:43:0	0/0:0,-2.40765,-30.5994:24:PASS:328:543:351:2:15:2:8:0	0/0:0,-9.3283,-111.296:93:PASS:880:1649:839:2:20:16:31:0	0/0:0,-9.02767,-108.497:90:PASS:896:1615:872:2:22:9:30:0	0/0:0,-14.1411,-168.793:141:PASS:1077:2014:1160:2:35:6:47:0	0/0:0,-17.7352,-207.474:10000:PASS:1140:2632:1370:2:43:3:59:0	0/0:0,-2.1068,-27.2996:21:PASS:292:534:277:2:9:0:7:0	0/0:0,-18.3423,-213.179:10000:PASS:1341:2573:1369:2:59:8:61:0	0/0:0,-20.1551,-238.486:10000:PASS:1258:2566:1379:2:62:8:67:0	0/0:0,-14.1407,-173.792:141:PASS:2126:4488:2425:2:76:10:47:0	0/0:0,-2.7083,-33.799:27:PASS:225:470:257:2:14:1:9:0	0/0:0,-15.9378,-184.883:157:PASS:1143:2103:1261:2:55:5:53:0	0/0:0,-8.11838,-92.1906:81:PASS:797:1512:834:2:46:0:27:0	0/0:0,-9.02299,-101.392:90:PASS:690:1484:713:2:40:1:30:0	0/0:0,-7.82254,-91.8958:78:PASS:754:1161:609:2:29:0:26:0	0/0:0,-12.9384,-154.894:129:PASS:1239:1948:1239:2:48:1:43:0	0/0:0,-8.12305,-96.4952:81:PASS:689:1416:732:2:35:0:27:0	0/0:0,-9.92633,-115.892:99:PASS:817:1302:997:1:33:1:33:0	0/0:0,-12.3206,-134.778:123:PASS:891:1754:905:2:55:0:41:0	0/0:0,-8.12168,-97.8939:81:PASS:557:1140:764:2:21:0:27:0	0/0:0,-8.1234,-96.4956:81:PASS:610:1256:684:2:30:0:27:0	0/0:0,-8.42402,-99.3952:84:PASS:728:1456:776:2:27:0:28:0	0/0:0,-4.8071,-55.0906:48:PASS:650:1209:612:2:25:0:16:0	0/0:0,-19.5579,-233.891:10000:PASS:1475:3056:1795:2:65:23:65:0	0/0:0,-8.12009,-93.5923:81:PASS:667:1210:623:2:36:0:27:0	0/0:0,-6.91591,-80.4922:69:PASS:675:1222:686:2:27:1:23:0	0/0:0,-8.72604,-103.596:87:PASS:753:1514:842:2:36:0:29:0	0/0:0,-7.2179,-83.0932:72:PASS:581:1169:619:2:21:1:24:0	0/0:0,-6.61819,-78.1955:66:PASS:670:1141:644:2:28:2:22:0	0/0:0,-7.2171,-82.4924:72:PASS:735:1541:785:2:44:0:24:0	0/0:0,-7.82284,-93.3961:78:PASS:656:1294:662:2:32:1:26:0
Chr01	11466987	11467971	DUP00002741	984	0.991525	0.00847458	0	0	PASS	PRECISE	DUP	60	-1,1	-1,1	ATGCACAGTTCAGATCTGATGTCATGAAACCGCTGAAAATTGAAGAACTCATGGACAGGCAATTTGCAAATCTTTCTGGCGGGGAGCTACAAAGGGTTGCACTTTGTCTTTGTCTTTGCCATCCTGCTATCTGGATGTGAAACAAAGGCTGAAAGCTGCACAAGTTATTCGTTCATTACTACAACCCAAAAAGTAACGAAAAGTACATTAAAGAACCATAATTT	0/0:0,-2.40774,-30.9995:24:PASS:22:56:21:3:18:0:8:0	0/0:0,-12.0322,-139.291:120:PASS:83:152:80:2:58:0:40:0	0/0:0,-14.4257,-166.076:144:PASS:95:196:99:2:89:0:48:0	0/0:0,-12.6323,-143.789:126:PASS:74:153:79:2:62:0:42:0	0/0:0,-3.61166,-46.9993:36:PASS:34:63:35:2:21:0:12:0	0/0:0,-8.42522,-99.8964:84:PASS:64:130:51:2:32:0:28:0	0/0:0,-10.8325,-128.995:108:PASS:70:138:79:2:48:0:36:0	0/0:0,-14.1406,-167.592:141:PASS:94:188:90:2:70:0:47:0	0/0:0,-13.2365,-152.791:132:PASS:96:190:99:2:65:0:44:0	0/0:0,-2.70802,-32.2988:27:PASS:38:63:28:2:24:0:9:0	0/0:0,-15.6382,-180.485:157:PASS:102:194:92:2:67:0:52:0	0/0:0,-18.3509,-215.788:10000:PASS:96:237:109:2:91:0:61:0	0/0:0,-13.2406,-163.595:132:PASS:163:376:176:2:126:0:44:0	0/0:0,-2.4075,-30.9993:24:PASS:20:56:29:2:24:0:8:0	0/0:0,-16.8204,-195.863:10000:PASS:107:216:111:2:86:0:56:0	0/0:0,-7.82182,-92.495:78:PASS:61:127:59:2:53:0:26:0	0/0:0,-9.02022,-102.489:90:PASS:54:115:56:2:49:0:30:0	0/0:0,-6.01532,-71.8947:60:PASS:56:105:39:2:37:0:20:0	0/0:0,-12.639,-153.796:126:PASS:74:157:80:2:46:0:42:0	0/0:0,-6.91793,-81.3942:69:PASS:51:110:67:2:52:0:23:0	0/0:0,-7.8227,-92.1959:78:PASS:52:89:45:2:39:0:26:0	0/0:0,-10.2203,-116.085:102:PASS:61:149:74:2:61:0:34:0	0/0:0,-5.41571,-62.9972:54:PASS:38:81:39:2:31:0:18:0	0/0:0,-9.32476,-107.693:93:PASS:60:98:50:2:43:0:31:0	0/0:0,-9.31874,-109.087:93:PASS:73:113:59:2:54:0:31:0	0/0:0,-6.31717,-73.2955:63:PASS:45:86:42:2:32:0:21:0	0/0:0,-20.4611,-244.891:10000:PASS:136:246:134:2:103:0:68:0	0/0:0,-7.51977,-88.794:75:PASS:46:109:46:2:42:0:25:0	0/0:0,-9.32776,-111.696:93:PASS:66:96:59:2:48:0:31:0	0/0:0,-8.12463,-97.8968:81:PASS:70:94:64:1:43:0:27:0	0/0:0,-6.31901,-76.6974:63:PASS:38:95:49:2:40:0:21:0	0/0:0,-7.52229,-88.9965:75:PASS:53:92:57:2:46:0:25:0	0/0:0,-7.21851,-83.7938:72:PASS:59:114:41:2:42:0:24:0	0/0:0,-6.62056,-81.1979:66:PASS:48:102:41:2:35:0:22:0
Chr01	14602825	14605266	DEL00006615	2441	0.974576	0.0254237	0	0	PASS	PRECISE	DEL	30	-2,2	-2,2	TGCTAAAATGACTAAAAAAAATGTTGCTTCCTTCTGTCAGGTTAACTCTTCCGTTCATTAGTAATGGTGTTGTCCACTTGTTAGGTTTAATTTTTGCAGATGGAGTCTCCTACATAATTTAGCTTCTATGTGCGCTGTGCTATCTGATCTATAGTAAGCTCAGCTCAAGCATAGTTTTTATGAAACGTTGCTTTCATGCTAATCT	0/0:0,-1.50485,-19.3997:15:PASS:50:68:54:1:18:0:5:0	0/0:0,-11.4277,-135.589:114:PASS:168:345:199:2:59:0:38:0	0/0:0,-12.0224,-143.981:120:PASS:250:345:214:1:68:2:40:0	0/0:0,-12.0356,-144.994:120:PASS:198:351:182:2:59:0:40:0	0/0:0,-3.31018,-41.0989:33:PASS:81:119:64:2:26:0:11:0	0/0:0,-9.62928,-115.796:96:PASS:127:269:150:2:32:2:32:0	0/0:0,-6.62022,-79.6976:66:PASS:136:222:146:2:26:1:22:0	0/0:0,-9.01757,-104.987:90:PASS:218:283:199:1:52:0:30:0	0/0:0,-13.529,-155.583:135:PASS:225:402:220:2:57:0:45:0	0/0:0,-2.40761,-30.1994:24:PASS:77:96:68:1:23:0:8:0	0/0:0,-11.4301,-134.891:114:PASS:233:411:229:2:69:0:38:0	0/0:0,-16.5431,-193.086:10000:PASS:272:440:245:2:79:0:55:0	0/0:0,-16.2351,-197.88:10000:PASS:430:821:458:2:127:0:54:0	0/0:0,-1.80578,-23.0996:18:PASS:72:69:45:1:15:0:6:0	0/0:0,-9.02451,-104.394:90:PASS:252:351:198:2:60:0:30:0	0/0:0,-10.5262,-121.19:105:PASS:171:279:166:2:58:0:35:0	0/0:0,-8.42178,-99.2929:84:PASS:137:280:154:2:47:0:28:0	0/0:0,-10.0993,-104.963:101:PASS:132:232:120:2:43:0:35:0	0/0:0,-16.8492,-200.092:10000:PASS:259:398:196:2:60:0:56:0	0/1:-4.90667,0,-105.358:49:PASS:164:277:149:2:52:7:37:5	0/0:0,-15.6715,-156.816:157:PASS:256:296:189:1:50:0:54:0	0/0:0,-12.0169,-135.476:120:PASS:180:302:155:2:60:1:40:0	0/0:0,-8.72658,-106.897:87:PASS:158:237:116:2:38:0:29:0	0/0:0,-10.9073,-117.768:109:PASS:112:230:126:2:45:1:38:0	0/0:0,-9.05815,-101.426:91:PASS:163:241:158:2:43:0:31:0	0/0:0,-8.73269,-89.6008:87:PASS:123:212:114:2:39:0:31:0	0/0:0,-23.2782,-247.795:10000:PASS:324:615:294:2:85:1:81:0	0/0:0,-8.12252,-95.4947:81:PASS:120:238:136:2:42:0:27:0	0/0:0,-7.71826,-85.2905:77:PASS:130:218:134:2:43:0:27:0	0/0:0,-12.6872,-141.642:127:PASS:156:239:135:2:63:1:44:0	0/0:0,-7.42617,-78.0994:74:PASS:134:167:119:1:30:0:26:0	0/0:0,-8.12257,-95.9948:81:PASS:148:223:124:2:46:0:27:0	0/0:0,-10.1188,-107.582:101:PASS:163:238:176:1:50:0:36:0	0/0:0,-8.72496,-103.595:87:PASS:120:233:144:2:46:1:29:0
Chr01	14910062	14914250	DEL00006824	4188	0.978814	0.0211864	0	0	PASS	PRECISE	DEL	60	-7,7	-7,7	CGTAAATATCAACGCTGCAGGCATACGAATACTGTCTGTAACTATCCTCTGGTTAGCAGTCAACTAGTAGGGAGCTGGGAAACTCACGGGCCAGCAGGGAGCAAGTAGCTTCAGCTACAAAATAAATGTGTTTGCTCTTTATGAGAATAAGTACCAAAGAGATTACTCAAACAAAGACAAATTGCTACACACAGTTAACAATTCATTATG	0/0:0,-2.70868,-34.6994:27:PASS:66:197:110:2:19:0:9:0	0/0:0,-12.5872,-145.944:126:PASS:227:687:335:2:66:0:42:0	0/0:0,-14.1371,-165.589:141:PASS:276:741:397:2:79:0:47:0	0/0:0,-10.8304,-128.493:108:PASS:246:638:328:2:61:0:36:0	0/0:0,-2.40768,-30.5994:24:PASS:74:198:121:2:27:0:8:0	0/0:0,-7.82401,-94.0972:78:PASS:198:509:240:2:35:1:26:0	0/0:0,-9.02773,-108.597:90:PASS:202:516:262:2:39:0:30:0	0/0:0,-13.2382,-158.993:132:PASS:225:727:360:2:68:0:44:0	0/0:0,-13.2349,-154.09:132:PASS:311:755:398:2:72:0:44:0	0/0:0,-1.80559,-22.4994:18:PASS:72:211:111:2:20:0:6:0	0/0:0,-13.8418,-168.294:138:PASS:299:802:422:2:65:0:46:0	0/0:0,-14.1407,-167.692:141:PASS:303:814:469:2:82:0:47:0	0/0:0,-14.4438,-178.594:144:PASS:557:1547:729:2:130:1:48:0	0/0:0,-1.50479,-19.0996:15:PASS:72:174:87:2:20:0:5:0	0/0:0,-14.4393,-169.99:144:PASS:282:768:405:2:76:0:48:0	0/0:0,-9.02712,-107.496:90:PASS:195:513:248:2:53:0:30:0	0/0:0,-8.72482,-102.595:87:PASS:162:458:207:2:52:0:29:0	0/0:0,-7.21554,-80.6908:72:PASS:138:445:205:3:48:0:24:0	0/0:0,-11.7353,-141.195:117:PASS:315:858:297:3:49:0:39:0	0/0:0,-8.72609,-103.996:87:PASS:184:458:222:2:44:0:29:0	0/0:0,-9.62494,-110.092:96:PASS:285:508:230:2:51:0:32:0	0/0:0,-7.51852,-87.6928:75:PASS:207:553:257:2:55:0:25:0	0/0:0,-7.22109,-85.4964:72:PASS:183:429:181:2:42:0:24:0	0/0:0,-5.11369,-58.9962:51:PASS:128:373:187:2:37:0:17:0	0/0:0,-10.8332,-131.396:108:PASS:201:543:267:2:55:0:36:0	0/0:0,-7.22059,-85.2959:72:PASS:134:367:176:2:39:0:24:0	0/0:0,-18.6528,-219.989:10000:PASS:388:1052:535:2:101:0:62:0	0/0:0,-8.72213,-101.192:87:PASS:151:412:230:2:45:1:29:0	0/0:0,-6.61635,-77.8937:66:PASS:146:389:234:2:44:0:22:0	0/0:0,-8.42433,-98.9955:84:PASS:159:483:241:2:52:0:28:0	0/0:0,-6.01686,-70.9963:60:PASS:128:372:241:2:40:0:20:0	0/0:0,-6.61742,-77.1948:66:PASS:142:436:225:2:43:0:22:0	0/0:0,-7.22113,-86.2964:72:PASS:162:498:249:2:49:0:24:0	0/0:0,-9.02724,-108.296:90:PASS:166:440:211:2:48:0:30:0
Chr01	16686015	17014180	INV00010312	328165	0.927966	0.0720339	0	0	PASS	PRECISE	INV	60	-5,5	-5,5	GTTGCAAAGCATCGTGAATCACTCAACGTGTCTGTATGGATTATTAGTCTCCACTCCTTGGAAAGGATTACTCTTAGCCATGTCGTTTATTCCTTTATTCAAGTTGTACTCTGCCCTTCGGCTCGGCATATGGAACCTCTCAACTGCTCCCTCGGGATAGGTAGGCCCATCCCCCACCCCCCTTTCCCGAGAGGCGGCCGGGCTGTGT	0/0:0,-2.67262,-31.1634:27:PASS:3616:28413:17079:3:35:0:9:0	0/0:0,-62.5528,-709.439:10000:PASS:20428:221510:145584:3:368:1:208:0	0/0:0,-120.061,-1000:10000:PASS:20340:478052:303475:3:708:0:400:0	0/0:0,-33.0061,-372.293:10000:PASS:20060:118887:75441:2:189:0:110:0	0/0:0,-6.01884,-74.9982:60:PASS:4636:45695:28225:3:49:0:20:0	0/0:0,-42.7286,-510.482:10000:PASS:18080:110190:73368:2:177:0:142:0	0/0:0,-68.6084,-821.274:10000:PASS:18151:191001:127322:3:297:0:228:0	0/0:0,-81.0856,-923.007:10000:PASS:19984:288391:186322:3:413:1:270:0	0/0:0,-81.479,-922.3:10000:PASS:24493:282981:187552:3:396:0:271:0	0/0:0,-9.02676,-109.296:90:PASS:4188:64687:42276:3:61:0:30:0	0/0:0,-116.671,-1000:10000:PASS:25206:432639:278279:3:623:0:388:0	0/0:0,-46.5419,-528.282:10000:PASS:23342:190602:120435:3:251:2:155:0	0/0:0,-85.5516,-1000:10000:PASS:42410:569960:364204:3:758:0:285:0	0/0:0,-4.81508,-60.5986:48:PASS:3979:51413:31256:3:45:0:16:0	0/0:0,-49.6307,-565.161:10000:PASS:20162:227627:141216:3:270:0:165:0	0/0:0,-30.9423,-348.736:10000:PASS:12862:146490:96946:3:199:0:103:0	0/0:0,-50.2173,-578.745:10000:PASS:12722:158182:112555:3:298:0:167:0	0/0:0,-48.3547,-562.589:10000:PASS:11720:165466:114452:3:276:0:161:0	0/0:0,-54.0578,-641.072:10000:PASS:17705:186800:119690:3:195:2:180:0	0/0:0,-45.8526,-529.795:10000:PASS:14691:154606:104021:3:257:1:153:0	0/0:0,-42.1165,-491.672:10000:PASS:14536:128867:82428:3:231:0:140:0	0/0:0,-39.6561,-452.22:10000:PASS:15288:169905:114330:3:263:1:132:0	0/0:0,-33.0583,-385.345:10000:PASS:11639:97417:64080:3:166:0:110:0	0/0:0,-50.5284,-589.855:10000:PASS:11901:169192:116336:3:270:0:168:0	0/0:0,-21.6475,-250.173:10000:PASS:11841:74443:51642:2:132:0:72:0	0/0:0,-36.9753,-425.349:10000:PASS:10858:138449:96254:3:204:0:123:0	0/0:0,-79.7175,-940.745:10000:PASS:31129:273698:182908:3:476:0:265:0	0/0:0,-64.0427,-733.223:10000:PASS:12496:190394:141721:2:363:0:213:0	0/0:0,-50.9453,-580.07:10000:PASS:12177:203616:142839:3:309:0:170:0	0/0:0,-57.4487,-664.752:10000:PASS:13856:173072:118661:3:332:2:191:0	0/0:0,-52.2131,-599.734:10000:PASS:10201:208184:140026:3:264:0:174:0	0/0:0,-36.0227,-413.199:10000:PASS:11259:131848:93548:3:221:1:120:0	0/0:0,-45.9954,-529.138:10000:PASS:13695:183661:127279:3:290:1:153:0	0/0:0,-40.3111,-474.473:10000:PASS:12402:157021:105676:3:237:0:134:0
Chr01	16876849	17079099	INV00010369	202250	0.995763	0.00423729	0	0	PASS	PRECISE	INV	51	-5,5	-5,5	GTACATGAAGACAGGAACCCAAAAACTCTGAGGAGCTTCACACTTTGTGGAGAGCACGGGAGAATTAGATGCACTGATGGACACGACGAGTGCTTCCTCCGGGGAGCCTTCCTACCTGAAGAAAAAGAGGGAGGGGGCGAAGATACTCTTACTAGTGCCCACAGCCTGGAGTAGAGGTGGAAGAAGACCCCAGCTCTTCTCAAAGATATAAGAGATTA	0/0:0,-11.434,-138.495:114:PASS:1243:34430:9590:6:124:0:38:0	0/0:0,-144.717,-1000:10000:PASS:5881:285610:75777:7:900:2:483:0	0/0:0,-335.18,-1000:10000:PASS:6025:614207:163091:7:2080:1:1117:0	0/0:0,-83.2611,-949.676:10000:PASS:5804:147523:40167:6:478:0:277:0	0/0:0,-17.1527,-212.294:10000:PASS:1518:56143:16077:6:195:2:57:0	0/0:0,-91.1751,-1000:10000:PASS:4637:140911:37637:7:382:0:303:0	0/0:0,-143.232,-1000:10000:PASS:4566:248458:65762:7:600:0:476:0	0/0:0,-183.72,-1000:10000:PASS:5561:371882:98169:7:1076:0:611:0	0/0:0,-170.114,-1000:10000:PASS:7825:357931:105420:6:938:0:566:0	0/0:0,-26.7813,-330.59:10000:PASS:1579:80206:25164:6:236:0:89:0	0/0:0,-307.325,-1000:10000:PASS:6903:558924:146953:7:1659:2:1023:0	0/0:0,-137.463,-1000:10000:PASS:6864:237767:65534:7:766:2:457:0	0/0:0,-222.125,-1000:10000:PASS:12731:730403:192080:7:2281:6:739:0	0/0:0,-21.0605,-255.088:10000:PASS:1353:63467:17689:7:230:1:70:0	0/0:0,-170.095,-1000:10000:PASS:6290:284519:77627:7:991:1:566:0	0/0:0,-82.9937,-944.309:10000:PASS:4951:182842:55557:6:511:1:276:0	0/0:0,-108.22,-1000:10000:PASS:4605:206060:60323:6:671:0:360:0	0/0:0,-97.752,-1000:10000:PASS:3354:211587:65413:6:650:0:325:0	0/0:0,-153.363,-1000:10000:PASS:5455:233455:66852:6:638:12:510:0	0/0:0,-101.656,-1000:10000:PASS:4433:195040:59163:6:612:2:338:0	0/0:0,-82.7187,-961.135:10000:PASS:4651:162045:43642:7:454:0:275:0	0/0:0,-98.5386,-1000:10000:PASS:5747:213038:65312:6:631:1:328:0	0/0:0,-59.5697,-715.866:10000:PASS:3868:122763:34658:6:337:2:198:0	0/0:0,-98.0509,-1000:10000:PASS:4158:215835:66233:6:614:2:326:0	0/0:0,-50.8312,-592.857:10000:PASS:4285:93602:27713:6:287:2:169:0	0/0:0,-76.9584,-879.895:10000:PASS:3767:176149:55009:6:510:1:256:0	0/0:0,-179.427,-1000:10000:PASS:8754:344729:103152:6:1066:2:597:0	0/0:0,-135.893,-1000:10000:PASS:3426:254048:75402:6:827:2:452:0	0/0:0,-131.096,-1000:10000:PASS:3392:261962:81881:6:785:1:436:0	0/0:0,-107.905,-1000:10000:PASS:4856:219518:67369:6:699:1:359:0	0/0:0,-130.465,-1000:10000:PASS:3719:264249:81004:6:775:0:434:0	0/0:0,-76.115,-891.654:10000:PASS:3394:168854:53318:6:511:2:253:0	0/0:0,-110.697,-1000:10000:PASS:4820:233400:73104:6:706:4:368:0	0/0:0,-97.1757,-1000:10000:PASS:4425:199279:59337:6:547:0:323:0
Chr01	16878248	17167450	INV00010386	289202	0.983051	0.0169492	0	0	PASS	PRECISE	INV	60	-4,4	-4,4	CAAAACCTTCTTCCTTGATCCATGGCGTCACCGCTGCTATATTCATAGAGTAATTCTATTGGCTGGCTATGATTCCAGCAAATAAGTCTTGGGGTCATTCCGGGCTGATGCTTCTCCATGAGCTTTTGAGAAAGTCAAAGACTTTTACAGTAGGTTTAACTGTATCTTGGATCTTAGAATCTGATTCGTAACTTTGGATAAATCGATCCCTGAAATCAT	0/0:0,-15.3448,-195.192:154:PASS:2379:41360:10419:6:139:0:51:0	0/0:0,-156.633,-1000:10000:PASS:11811:337288:93857:6:842:0:522:0	0/0:0,-357.777,-1000:10000:PASS:11999:725960:193788:7:1951:2:1190:0	0/0:0,-85.4325,-1000:10000:PASS:11662:175479:47803:6:447:0:284:0	0/0:0,-24.9724,-317.387:10000:PASS:2964:67642:17535:7:215:5:83:0	0/0:0,-74.9249,-894.068:10000:PASS:9642:166219:46271:6:280:0:249:0	0/0:0,-137.201,-1000:10000:PASS:9574:293395:78565:7:536:0:456:0	0/0:0,-206.234,-1000:10000:PASS:11139:439087:121000:7:992:1:686:0	0/0:0,-193.036,-1000:10000:PASS:14892:434554:108108:7:939:3:642:0	0/0:0,-33.1065,-429.393:10000:PASS:2884:99308:22992:8:290:0:110:0	0/0:0,-318.485,-1000:10000:PASS:14122:658452:180538:7:1590:0:1060:0	0/0:0,-147.121,-1000:10000:PASS:13715:283519:76560:6:765:2:490:0	0/0:0,-260.887,-1000:10000:PASS:25343:862378:230788:7:2111:8:867:0	0/0:0,-24.0706,-305.588:10000:PASS:2670:76201:19170:7:266:0:80:0	0/0:0,-173.189,-1000:10000:PASS:12354:339011:89270:7:919:0:576:0	0/0:0,-95.9433,-1000:10000:PASS:8832:223644:57025:7:552:2:319:0	0/0:0,-93.5224,-1000:10000:PASS:8443:248714:67138:7:299:2:311:0	0/0:0,-113.712,-1000:10000:PASS:6704:259364:66044:7:668:0:378:0	0/0:0,-129.304,-1000:10000:PASS:10735:281806:67412:7:532:16:430:0	0/0:0,-42.8933,-1000:10000:PASS:8404:238006:59453:7:584:12:332:20	0/0:0,-78.5207,-930.552:10000:PASS:9566:192789:46739:7:430:2:261:0	0/0:0,-113.306,-1000:10000:PASS:10336:260374:66274:7:662:2:377:0	0/0:0,-60.296,-713.388:10000:PASS:7550:147234:37303:7:322:1:202:0	0/0:0,-113.427,-1000:10000:PASS:7548:263978:67619:7:638:1:377:0	0/0:0,-52.0419,-614.464:10000:PASS:7966:113159:31872:6:163:1:173:0	0/0:0,-95.3348,-1000:10000:PASS:6891:216436:54423:7:538:3:317:0	0/0:0,-176.908,-1000:10000:PASS:17801:419235:108801:7:943:4:588:0	0/0:0,-122.109,-1000:10000:PASS:7145:306949:87885:6:413:3:406:0	0/0:0,-147.092,-1000:10000:PASS:6996:321457:83062:7:784:1:489:0	0/0:0,-117.323,-1000:10000:PASS:8861:268956:67989:7:663:2:390:0	0/0:0,-146.162,-1000:10000:PASS:6734:322855:80750:7:797:0:486:0	0/0:0,-97.1733,-1000:10000:PASS:6838:207279:55546:7:533:1:323:0	0/0:0,-122.425,-1000:10000:PASS:8801:287078:72033:7:707:2:407:0	0/0:0,-105.011,-1000:10000:PASS:8064:242453:61270:7:522:1:349:0
Chr01	16879364	17162222	DUP00004499	282858	0.995763	0.00423729	0	0	PASS	PRECISE	DUP	47	-2,2	-2,2	CCGTAATTGTCTTCCCTAGAGTCCATTTAAGGGTTCAAGGAGATGGTATCCATGTCGGTGCAATTTTATAGAGGTTCAAAGCCCACGGAGCGGTAGGTCGACATTCCTTCTTCTTTCCAAGCTTCTGGTGGTATCTATACCTTTCGAGACCAAGCCCTGCTACAATTCATTGCTGGAAGAGACTGCTAG	0/0:0,-6.31993,-79.3983:63:PASS:2305:40298:11073:6:60:0:21:0	0/0:0,-82.6087,-958.325:10000:PASS:11381:329383:99254:6:423:0:275:0	0/0:0,-193.009,-1000:10000:PASS:11650:708376:205540:7:997:0:642:0	0/0:0,-45.7227,-528.166:10000:PASS:11266:171327:50702:6:219:0:152:0	0/0:0,-11.4353,-145.096:114:PASS:2867:65817:18688:6:98:0:38:0	0/0:0,-42.1272,-503.183:10000:PASS:9264:162350:48920:6:157:0:140:0	0/0:0,-75.2275,-898.77:10000:PASS:9198:286512:83269:6:280:0:250:0	0/0:0,-109.179,-1000:10000:PASS:10710:428444:128309:6:522:0:363:0	0/0:0,-217.095,-1000:10000:PASS:14339:416924:122604:6:919:0:722:0	0/0:0,-33.9944,-424.078:10000:PASS:2807:94336:27153:6:259:0:113:0	0/0:0,-172.753,-1000:10000:PASS:13617:642310:191389:6:828:0:575:0	0/0:0,-75.1493,-868.392:10000:PASS:13213:276192:81537:6:349:0:250:0	0/0:0,-133.102,-1000:10000:PASS:24466:843067:242824:6:1063:0:443:0	0/0:0,-12.3369,-152.195:123:PASS:2590:74175:20425:6:103:0:41:0	0/0:0,-95.3342,-1000:10000:PASS:11911:330282:95087:6:470:0:317:0	0/0:0,-99.2625,-1000:10000:PASS:8535:214726:64433:6:546:0:330:0	0/0:0,-128.682,-1000:10000:PASS:8156:240001:74052:6:689:0:428:0	0/0:0,-120.946,-1000:10000:PASS:6461:249162:74534:6:688:0:402:0	0/0:0,-127.535,-1000:10000:PASS:10416:271995:75254:6:544:1:424:0	0/0:0,-24.3557,-1000:10000:PASS:8090:228883:67000:6:617:3:374:27	0/0:0,-77.8943,-920.028:10000:PASS:9226:186735:51531:6:382:0:259:0	0/0:0,-123.809,-1000:10000:PASS:10014:249941:74956:6:689:0:412:0	0/1:-20.1295,0,-705.254:10000:PASS:7282:142243:41295:6:292:9:216:26	0/0:0,-116.121,-1000:10000:PASS:7284:253546:76324:6:612:0:386:0	0/0:0,-67.0875,-796.058:10000:PASS:7683:109355:34687:5:302:1:223:0	0/0:0,-93.5505,-1000:10000:PASS:6675:207886:61621:6:521:0:311:0	0/0:0,-180.222,-1000:10000:PASS:17257:403500:121898:6:938:0:599:0	0/0:0,-144.341,-1000:10000:PASS:6885:297103:95470:6:773:0:480:0	0/0:0,-149.748,-1000:10000:PASS:6725:308568:93742:6:760:0:498:0	0/0:0,-125.097,-1000:10000:PASS:8566:258484:76747:6:689:0:416:0	0/0:0,-149.967,-1000:10000:PASS:6540:310150:91199:6:774:0:499:0	0/0:0,-94.1762,-1000:10000:PASS:6595:199025:62448:6:502:0:313:0	0/0:0,-116.428,-1000:10000:PASS:8471:275744:81552:6:689:0:387:0	0/0:0,-108.017,-1000:10000:PASS:7818:233186:68933:6:511:0:359:0
Chr01	16879520	17218433	INV00010416	338913	0.995763	0.00423729	0	0	PASS	PRECISE	INV	60	-3,3	-3,3	ATAGTTCGCTTCAGGGTTGTAGATAATGCTTGACTTGGCGATTGACCATTCCATCCCTACCGAGCCGCCTCTTCGAAGTATTTACCTCTGCCTTTATTTTTTTCTCAAATAAAAAAGAAAAAATCAAGAACCTCGTCTGTGATTTAATCG	0/0:0,-10.2306,-125.896:102:PASS:2842:46765:3429:15:77:0:34:0	0/0:0,-153.767,-1000:10000:PASS:14380:388260:16381:25:855:0:512:0	0/0:0,-325.652,-1000:10000:PASS:14513:829491:17219:52:1756:1:1084:0	0/0:0,-77.7843,-876.318:10000:PASS:14291:200906:15678:13:427:1:259:0	0/0:0,-15.3444,-186.592:154:PASS:3585:76659:4612:19:141:0:51:0	0/0:0,-79.3411,-944.369:10000:PASS:11896:190971:12767:15:294:0:264:0	0/0:0,-138.415,-1000:10000:PASS:11846:335401:12701:27:510:0:460:0	0/0:0,-198.945,-1000:10000:PASS:13755:504451:16314:34:977:2:663:0	0/0:0,-178.042,-1000:10000:PASS:18134:493855:18278:27:845:1:593:0	0/0:0,-18.2987,-226.736:10000:PASS:3390:111414:3949:30:154:0:61:0	0/0:0,-324.808,-1000:10000:PASS:17388:756022:20205:40:1561:3:1082:0	0/0:0,-124.71,-1000:10000:PASS:16699:324462:19545:18:614:3:415:0	0/0:0,-231.572,-1000:10000:PASS:31190:983610:35368:30:1951:5:771:0	0/0:0,-18.5982,-228.834:10000:PASS:3135:85951:3756:25:166:0:62:0	0/0:0,-143.273,-1000:10000:PASS:14915:386016:17685:24:778:1:477:0	0/0:0,-85.5471,-965.054:10000:PASS:10605:255147:11473:23:487:0:285:0	0/0:0,-114.155,-1000:10000:PASS:10255:285266:10271:28:615:0:380:0	0/0:0,-110.979,-1000:10000:PASS:8343:295419:10150:32:609:1:369:0	0/0:0,-116.726,-1000:10000:PASS:12960:317361:15676:22:482:10:388:0	0/0:0,-52.6368,-1000:10000:PASS:10144:271042:10744:26:529:23:314:16	0/0:0,-84.1936,-963.005:10000:PASS:11237:217355:10171:20:431:3:280:0	0/0:0,-102.233,-1000:10000:PASS:12434:296993:12896:23:556:1:341:0	0/1:-15.0667,0,-624.3:151:PASS:8892:167402:7817:20:314:23:197:31	0/0:0,-105.523,-1000:10000:PASS:9164:301412:9202:33:553:1:351:0	0/0:0,-56.8625,-673.968:10000:PASS:9434:130182:9990:13:286:0:189:0	0/0:0,-81.3214,-915.442:10000:PASS:8339:246369:8910:29:432:0:271:0	0/0:0,-174.044,-1000:10000:PASS:21905:479289:24093:21:913:2:579:0	0/0:0,-144.218,-1000:10000:PASS:8783:354179:9729:38:746:2:480:0	0/0:0,-123,-1000:10000:PASS:8630:366746:10061:39:674:2:410:0	0/0:0,-117.168,-1000:10000:PASS:10743:306683:11706:27:638:0:390:0	0/0:0,-129.998,-1000:10000:PASS:8006:367294:7510:47:706:2:434:0	0/0:0,-87.7612,-1000:10000:PASS:8415:238507:9961:26:489:0:292:0	0/0:0,-112.094,-1000:10000:PASS:10795:327091:11505:29:618:1:373:0	0/0:0,-104.677,-1000:10000:PASS:9814:275870:9774:28:522:1:348:0
Chr01	16892207	17010638	INV00010446	118431	0.983051	0.0169492	0	0	PASS	PRECISE	INV	60	-4,4	-4,4	ATGAAAGTGCTAACTAACCTTACCTTATTTCTAGGAGCTAGTGGAATATCTGACCTGATTATAAGCTCTATTAATTTCGAATTTCAAATTCAAGTAAGTAAGAAAAGAAATCTTCTCCGGGTGACTGGATCGCCCCGGAACCACAAGAATCCTTAGAATGGGATTCCAACTCAGCACCTTTTGTTTTGAGATTTTGAGAAGAGTTG	0/0:0,-10.5323,-129.796:105:PASS:2901:23269:7438:5:100:0:35:0	0/0:0,-146.959,-1000:10000:PASS:20817:186345:68728:4:744:0:489:0	0/0:0,-317.604,-1000:10000:PASS:48229:408963:137560:4:1635:2:1056:0	0/0:0,-76.0248,-882.764:10000:PASS:10800:97113:34812:4:400:0:253:0	0/0:0,-18.959,-236.994:10000:PASS:4694:37982:12149:5:157:1:63:0	0/0:0,-67.1026,-799.273:10000:PASS:9808:90929:35308:4:262:0:223:0	0/0:0,-136.611,-1000:10000:PASS:17010:162129:61064:4:539:0:454:0	0/0:0,-205.153,-1000:10000:PASS:26792:245835:87037:4:950:0:683:0	0/0:0,-172.512,-1000:10000:PASS:24605:241074:80891:5:809:0:574:0	0/0:0,-22.5491,-283.572:10000:PASS:6097:55280:16873:5:210:0:75:0	0/0:0,-272.927,-1000:10000:PASS:42371:368624:130061:4:1343:2:908:0	0/0:0,-123.474,-1000:10000:PASS:18676:158018:53870:4:627:1:411:0	0/0:0,-224.956,-1000:10000:PASS:56722:481551:168220:4:1801:2:748:0	0/0:0,-16.2499,-202.794:10000:PASS:5538:43066:13367:5:179:1:54:0	0/0:0,-147.392,-1000:10000:PASS:23125:191006:61752:5:740:0:490:0	0/0:0,-93.2209,-1000:10000:PASS:12720:123795:41732:5:482:1:310:0	0/0:0,-116.597,-1000:10000:PASS:15272:132392:52177:4:619:0:388:0	0/0:0,-100.784,-1000:10000:PASS:14596:141916:49179:4:566:1:335:0	0/0:0,-121.553,-1000:10000:PASS:16475:158637:51487:5:435:4:404:0	0/0:0,-105.192,-1000:10000:PASS:13432:131079:45289:4:587:0:350:0	0/0:0,-83.9129,-978.826:10000:PASS:11281:107328:38669:4:434:4:279:0	0/0:0,-105.115,-1000:10000:PASS:14956:143190:49212:4:576:1:350:0	0/1:-9.32998,0,-679.963:93:PASS:8293:81088:29501:4:326:8:211:22	0/0:0,-101.67,-1000:10000:PASS:14447:144809:50587:4:576:1:338:0	0/0:0,-54.7543,-647.267:10000:PASS:7634:59200:23912:4:283:0:182:0	0/0:0,-79.1056,-919.735:10000:PASS:12077:117735:41431:4:439:2:263:0	0/0:0,-176.894,-1000:10000:PASS:23203:231040:80509:4:917:0:588:0	0/0:0,-140.374,-1000:10000:PASS:19488:160125:66270:4:758:1:467:0	0/0:0,-126.047,-1000:10000:PASS:18205:175231:61075:4:652:1:419:0	0/0:0,-110.69,-1000:10000:PASS:15023:147090:51289:4:605:1:368:0	0/0:0,-136.19,-1000:10000:PASS:18378:179425:59466:5:731:0:453:0	0/0:0,-81.5411,-978.262:10000:PASS:11539:112169:40278:4:472:0:271:0	0/0:0,-120.936,-1000:10000:PASS:15821:156743:54365:4:658:2:402:0	0/0:0,-98.3859,-1000:10000:PASS:13297:133825:46421:4:510:0:327:0
Chr01	16893804	16990552	INV00010457	96748	0.949153	0.0508475	0	0	PASS	PRECISE	INV	60	-3,3	-3,3	TCTTGTTTAGTTTGTTTGGCCTTGACCGTCGATTAGCCAAGTCATGAATTTACATTTTTTGTGCTTTTGGCTTCCGGTTACCAGAAAAGGGACCTTCGCCCTATTATCTTTCTAGGCTTATTTCAATATAACAAATCTGCCAATCCCGATATTCCCACATTTCATTCTGGTCCAGTGTCCATTCCTGAATGAAAGAAATGAGCTTTTTTCTGCGCCCCT	0/0:0,-11.7345,-144.594:117:PASS:3426:18084:6118:4:117:1:39:0	0/0:0,-145.708,-1000:10000:PASS:24292:145711:53950:4:796:8:485:0	0/0:0,-312.121,-1000:10000:PASS:56306:322786:109867:4:1769:9:1038:0	0/0:0,-79.2336,-918.462:10000:PASS:12706:75678:27868:4:429:6:264:0	0/0:0,-19.5598,-245.693:10000:PASS:5503:29833:9802:4:156:3:65:0	0/0:0,-69.8099,-831.471:10000:PASS:11536:70854:26792:4:271:2:232:0	0/0:0,-138.116,-1000:10000:PASS:20184:126484:47532:4:562:1:459:0	0/0:0,-207.714,-1000:10000:PASS:31531:192927:68823:4:1029:3:691:0	0/0:0,-165.035,-1000:10000:PASS:28655:193022:62684:4:811:0:549:0	0/0:0,-22.2701,-280.594:10000:PASS:7175:44232:13161:4:182:1:74:0	0/0:0,-288,-1000:10000:PASS:49497:288540:103979:4:1429:5:958:0	0/0:0,-136.825,-1000:10000:PASS:21972:123823:42973:4:664:8:455:0	0/0:0,-241.969,-1000:10000:PASS:66515:376755:133056:4:1925:9:805:0	0/0:0,-21.3677,-271.395:10000:PASS:6461:33895:10736:4:190:0:71:0	0/0:0,-158.224,-1000:10000:PASS:27013:150223:49894:4:849:6:526:0	0/0:0,-97.3806,-1000:10000:PASS:14843:98066:33345:4:545:0:324:0	0/0:0,-29.8917,-1000:10000:PASS:17944:101322:40552:3:616:5:380:26	0/0:0,-105.893,-1000:10000:PASS:16892:111441:40081:4:617:0:352:0	0/0:0,-129.636,-1000:10000:PASS:19178:126159:40538:4:528:6:431:0	0/0:0,-100.47,-1000:10000:PASS:15700:102679:37085:4:567:3:334:0	0/0:0,-69.4826,-812.745:10000:PASS:13172:84986:29725:4:406:0:231:0	0/0:0,-106.445,-1000:10000:PASS:17430:113789:38379:4:602:0:355:0	0/0:0,-58.603,-690.302:10000:PASS:9756:64363:22576:4:282:0:195:0	0/0:0,-105.89,-1000:10000:PASS:16922:114460:40067:4:594:0:352:0	0/0:0,-48.14,-576.075:10000:PASS:8933:44508:18768:3:258:0:160:0	0/0:0,-54.1074,-998.889:10000:PASS:14081:92148:33529:4:484:0:302:12	0/0:0,-171.456,-1000:10000:PASS:27057:182640:64115:4:918:0:570:0	0/0:0,-76.0165,-1000:10000:PASS:22582:120051:52973:3:806:2:463:20	0/0:0,-134.732,-1000:10000:PASS:21104:139318:47381:4:753:3:448:0	0/0:0,-13.3288,-1000:133:PASS:17488:115952:41057:4:626:2:353:29	0/0:0,-141.073,-1000:10000:PASS:21413:141905:48592:4:764:1:469:0	0/0:0,-81.785,-966.805:10000:PASS:13449:88659:30949:4:462:0:272:0	0/0:0,-45.7505,-1000:10000:PASS:18487:123339:43874:4:702:1:395:23	0/0:0,-50.8688,-1000:10000:PASS:15526:105768:36961:4:536:3:330:15
Chr01	16912342	17079564	INV00010494	167222	0.995763	0.00423729	0	0	PASS	PRECISE	INV	50	-3,3	-3,3	TTTCCTACTTTTGAATTTAGATCGAATATCTCGTATCTATAAGCAGGGGGGCGTGGCCAAGAAGCAGCCAGCTGACTGCCCCCTTCAACCCGACCTTTATTCACTGTGCGAACAAGCTGGTAATTCTCTTCAAAATGGAGTATAATAGTAACTTGTGATTTTGTCTGGTATTTATGCTTTC	0/0:0,-9.93073,-123.097:99:PASS:5886:28962:6473:5:102:1:33:0	0/0:0,-155.82,-1000:10000:PASS:46179:242181:48403:5:851:11:519:0	0/0:0,-331.195,-1000:10000:PASS:102216:518167:104841:5:1851:4:1104:0	0/0:0,-82.6391,-942.656:10000:PASS:23691:125341:26124:5:438:9:275:0	0/0:0,-17.1529,-218.894:10000:PASS:9518:47266:10736:5:159:8:57:0	0/0:0,-89.0503,-1000:10000:PASS:21576:120702:23919:5:331:0:296:0	0/0:0,-147.441,-1000:10000:PASS:37566:213185:42152:5:574:0:490:0	0/0:0,-206.206,-1000:10000:PASS:59095:316412:62510:5:1042:2:686:0	0/0:0,-171.244,-1000:10000:PASS:52908:308049:67069:5:881:0:570:0	0/0:0,-22.8697,-284.491:10000:PASS:12314:68706:16077:5:198:0:76:0	0/0:0,-316.631,-1000:10000:PASS:92034:472461:93017:5:1563:3:1055:0	0/0:0,-118.936,-1000:10000:PASS:40068:200293:42560:5:616:11:396:0	0/0:0,-252.015,-1000:10000:PASS:117963:620051:125883:5:1981:3:838:0	0/0:0,-18.0194,-222.158:10000:PASS:11103:53142:11887:5:166:4:60:0	0/0:0,-155.759,-1000:10000:PASS:48400:239201:50816:5:791:11:518:0	0/0:0,-81.6993,-946.819:10000:PASS:27594:156851:35805:5:469:2:272:0	0/0:0,-107.388,-1000:10000:PASS:33518:174648:38664:5:596:7:357:0	0/0:0,-104.364,-1000:10000:PASS:31306:182259:42190:5:588:2:347:0	0/0:0,-121.776,-1000:10000:PASS:33546:202350:43892:5:461:15:405:0	0/0:0,-89.9446,-1000:10000:PASS:28787:168043:37998:5:535:2:299:0	0/0:0,-89.1497,-1000:10000:PASS:23654:139942:27824:5:439:3:297:0	0/0:0,-103.911,-1000:10000:PASS:32529:182410:41484:5:631:0:346:0	0/0:0,-65.8377,-765.212:10000:PASS:18092:105758:22004:5:314:0:219:0	0/0:0,-107.993,-1000:10000:PASS:32150:185561:42157:5:598:0:359:0	0/0:0,-47.8332,-569.469:10000:PASS:16117:78457:18204:5:254:1:159:0	0/0:0,-80.5913,-936.515:10000:PASS:26192:151552:35367:5:446:11:268:0	0/0:0,-185.301,-1000:10000:PASS:49711:298325:65938:5:951:2:616:0	0/0:0,-135.231,-1000:10000:PASS:42247:214410:48799:5:778:10:450:0	0/0:0,-124.364,-1000:10000:PASS:38737:225609:52398:5:687:2:414:0	0/0:0,-105.762,-1000:10000:PASS:32770:188831:43563:5:617:21:352:0	0/0:0,-132.932,-1000:10000:PASS:39770:226773:51805:5:702:0:442:0	0/0:0,-75.8055,-893.746:10000:PASS:25149:145195:33930:5:450:0:252:0	0/0:0,-109.782,-1000:10000:PASS:34509:200974:47118:5:640:16:365:0	0/0:0,-103.193,-1000:10000:PASS:28991:172074:37950:5:503:8:343:0
Chr01	16918059	17000884	INV00010531	82825	0.991525	0.00847458	0	0	PASS	PRECISE	INV	60	-4,4	-4,4	AAGCAATGGCATGGGCATGAAAGGCTACGTAAATAAGTACTTCCCCGAAAGAAAGGGGGCTGTCTAAGGCGGGACCTATCCACTACTTGTGAAGTAATAGAAGAGAGGATTTCTCACATTGGGGGCTGGTAAATACGGCTATGAAGCCTCATTGAAAGGAAGTAGGAAATCAAGCAGAGGGCATGAAAGCAACTCGACCGAAGGGGGAGGAAGTGTTGTAGCGAGC	0/0:0,-9.62991,-120.597:96:PASS:6174:17347:4180:3:99:0:32:0	0/0:0,-157.716,-1000:10000:PASS:49579:136722:39164:3:845:0:525:0	0/0:0,-319.974,-1000:10000:PASS:109179:304808:77551:3:1746:2:1066:0	0/0:0,-79.3846,-906.713:10000:PASS:25354:71712:19810:3:422:1:264:0	0/0:0,-16.2476,-200.792:10000:PASS:10009:28326:6888:3:131:0:54:0	0/0:0,-69.2094,-825.272:10000:PASS:23584:66813:19455:3:289:0:230:0	0/0:0,-133.299,-1000:10000:PASS:41139:119569:34712:3:552:0:443:0	0/0:0,-197.316,-1000:10000:PASS:63607:181933:49448:3:941:0:657:0	0/0:0,-164.496,-1000:10000:PASS:64518:176898:44815:3:817:0:549:0	0/0:0,-26.4816,-332.291:10000:PASS:15099:40524:9161:3:180:1:88:0	0/0:0,-316.068,-1000:10000:PASS:99173:271067:74358:3:1573:5:1052:0	0/0:0,-136.152,-1000:10000:PASS:42635:116555:30514:3:676:7:453:0	0/0:0,-237.206,-1000:10000:PASS:127254:357960:93952:3:1896:6:789:0	0/0:0,-20.0381,-250.469:10000:PASS:11649:32222:7300:3:194:0:67:0	0/0:0,-159.218,-1000:10000:PASS:51597:141894:34620:3:818:0:530:0	0/0:0,-93.7986,-1000:10000:PASS:33822:89151:24116:3:520:1:312:0	0/0:0,-58.9148,-686.413:10000:PASS:36265:95350:29135:3:324:0:196:0	0/0:0,-99.5718,-1000:10000:PASS:38470:101825:28938:3:610:0:331:0	0/0:0,-126.35,-1000:10000:PASS:41020:116576:28969:3:516:10:420:0	0/0:0,-89.3068,-1000:10000:PASS:35252:94292:26842:3:552:1:297:0	0/0:0,-61.9534,-726.241:10000:PASS:28903:77416:22238:3:363:1:206:0	0/0:0,-100.211,-1000:10000:PASS:39929:102875:27774:3:599:1:334:0	0/0:0,-54.4165,-641.43:10000:PASS:22213:57871:17203:3:289:0:181:0	0/0:0,-101.955,-1000:10000:PASS:39453:104132:28923:3:597:3:339:0	0/0:0,-22.1879,-260.812:10000:PASS:17491:41709:13410:3:132:0:74:0	0/0:0,-74.5215,-858.266:10000:PASS:32161:84366:24021:3:434:4:248:0	0/0:0,-167.275,-1000:10000:PASS:61533:166952:46697:3:901:0:556:0	0/0:0,-86.3201,-994.125:10000:PASS:45921:112593:38204:3:434:3:287:0	0/0:0,-125.664,-1000:10000:PASS:47818:126641:34478:3:689:5:418:0	0/0:0,-106.066,-1000:10000:PASS:40226:105589:29586:3:631:2:353:0	0/0:0,-134.915,-1000:10000:PASS:49079:129076:35020:3:751:1:449:0	0/0:0,-76.4057,-898.244:10000:PASS:30777:80738:22311:3:445:2:254:0	0/0:0,-111.545,-1000:10000:PASS:42518:112719:31569:3:685:1:371:0	0/0:0,-101.085,-1000:10000:PASS:35829:96864:26570:3:478:0:336:0
Chr01	16921032	16999368	DUP00004574	78336	0.995763	0.00423729	0	0	PASS	PRECISE	DUP	60	-2,2	-2,2	GGAGATACAAGCGGTCAAAGCAGAAAGGGTTTGAGCTTCGACCGTGTTAACTCTTCTTTTAGAGGAAGTCAGTCAAGTTAGAATAGAATAGAATAGAATAGAACTAGCCGACCATTTCCAATAAAGTCTTCCCCTATAATCGAGAAAGCCGTCCAATAGCAAACCTAACCCCAGCCTAGACAAATAGAGTAGAGGGGTCTAAAAACCTATTATT	0/0:0,-13.8438,-175.596:138:PASS:5881:15945:4433:3:124:0:46:0	0/0:0,-152.172,-1000:10000:PASS:47597:126508:39760:3:853:0:506:0	0/0:0,-342.994,-1000:10000:PASS:102911:283201:79438:3:1839:1:1143:0	0/0:0,-84.4777,-967.888:10000:PASS:24290:66396:20320:3:452:0:281:0	0/0:0,-21.3634,-262.29:10000:PASS:9421:26221:7181:3:183:0:71:0	0/0:0,-74.6271,-893.672:10000:PASS:22371:62024:19761:3:281:0:248:0	0/0:0,-129.992,-1000:10000:PASS:39261:111131:35273:3:503:0:432:0	0/0:0,-221.73,-1000:10000:PASS:61313:168496:50400:3:1004:0:738:0	0/0:0,-193.122,-1000:10000:PASS:61371:165576:45700:3:907:0:644:0	0/0:0,-27.3867,-346.993:10000:PASS:14345:37816:9542:3:234:1:91:0	0/0:0,-308.295,-1000:10000:PASS:93999:251335:75807:3:1500:0:1026:0	0/0:0,-136.391,-1000:10000:PASS:40550:107767:31224:3:701:0:454:0	0/0:0,-241.031,-1000:10000:PASS:120378:331519:96525:3:1993:2:802:0	0/0:0,-26.4824,-330.792:10000:PASS:10961:29829:7648:3:233:0:88:0	0/0:0,-175.634,-1000:10000:PASS:48515:131632:35753:3:872:0:584:0	0/0:0,-89.9112,-1000:10000:PASS:32490:83401:24463:3:540:1:299:0	0/0:0,-59.2245,-689.722:10000:PASS:29920:92905:29678:3:281:0:197:0	0/0:0,-111.467,-1000:10000:PASS:36412:95150:29760:3:681:1:371:0	0/0:0,-127.186,-1000:10000:PASS:38136:109153:30078:3:513:1:423:0	0/0:0,-99.8828,-1000:10000:PASS:33217:88305:27513:3:556:5:332:0	0/0:0,-83.616,-976.03:10000:PASS:26852:73056:22456:3:410:0:278:0	0/0:0,-105.7,-1000:10000:PASS:38045:96270:28206:3:653:0:352:0	0/0:0,-50.7693,-601.595:10000:PASS:20808:54438:17403:3:238:0:169:0	0/0:0,-114.799,-1000:10000:PASS:37900:97299:29519:3:657:0:382:0	0/0:0,-29.79,-359.888:10000:PASS:14124:40550:13706:3:127:0:99:0	0/0:0,-91.995,-1000:10000:PASS:30847:78684:24598:3:552:0:306:0	0/0:0,-185.33,-1000:10000:PASS:58534:156135:47845:3:936:3:616:0	0/0:0,-75.1056,-879.948:10000:PASS:37820:109278:39171:3:368:1:250:0	0/0:0,-142.512,-1000:10000:PASS:45488:118330:35179:3:733:3:474:0	0/0:0,-114.017,-1000:10000:PASS:38515:98637:30250:3:669:0:379:0	0/0:0,-141.38,-1000:10000:PASS:46920:120544:35630:3:769:0:470:0	0/0:0,-89.287,-1000:10000:PASS:29357:75471:22730:3:526:0:297:0	0/0:0,-118.641,-1000:10000:PASS:40981:105201:32148:3:713:0:395:0	0/0:0,-109.496,-1000:10000:PASS:34462:90517:26953:3:577:0:364:0
Chr01	16921147	17001322	INV00010545	80175	0.995763	0.00423729	0	0	PASS	PRECISE	INV	60	-3,3	-3,3	ATTTCCAATAAAGTCTTCCCCTATAATCGAGAAAGCCGTCCAATAGCAAACCTAACCCCAGCCTAGACAAATAGAGTAGAGGGGTCTAAAAACCTATTATTTTAGAAAGGATAACTCCATCAATAAAATGTAACACTTTTCTGGAAGCTACGACTACCAAATCTGGTCCAGCATACAACTAGCCTGCACCCGACACCCAACTTATCTGAATCTCCTTGTCCATA	0/0:0,-10.8341,-136.697:108:PASS:6022:16511:3892:3:97:1:36:0	0/0:0,-156.524,-1000:10000:PASS:48782:130502:36540:3:887:1:521:0	0/0:0,-323.98,-1000:10000:PASS:105773:291846:72190:3:1803:4:1078:0	0/0:0,-80.2917,-934.617:10000:PASS:24935:68589:18479:3:431:0:267:0	0/0:0,-17.4554,-222.196:10000:PASS:9656:26965:6482:3:164:1:58:0	0/0:0,-70.1086,-840.269:10000:PASS:22905:63874:18267:3:292:0:233:0	0/0:0,-131.79,-1000:10000:PASS:40249:114468:32494:3:533:0:438:0	0/0:0,-211.422,-1000:10000:PASS:62946:173561:46135:3:1024:0:703:0	0/0:0,-171.145,-1000:10000:PASS:62782:170423:41678:3:850:0:569:0	0/0:0,-24.6505,-312.366:10000:PASS:14664:38847:8583:3:183:1:82:0	0/0:0,-304.164,-1000:10000:PASS:96498:259340:69161:3:1572:5:1012:0	0/0:0,-131.736,-1000:10000:PASS:41687:111214:28316:3:686:3:438:0	0/0:0,-238.717,-1000:10000:PASS:123200:342018:87346:3:1926:3:794:0	0/0:0,-17.447,-217.487:10000:PASS:11241:30717:6818:3:187:0:58:0	0/0:0,-158.167,-1000:10000:PASS:49930:135762:32209:3:843:1:526:0	0/0:0,-85.9964,-992.602:10000:PASS:33169:85673:22574:3:508:0:286:0	0/0:0,-56.0721,-653.48:10000:PASS:30574:96062:27214:3:306:0:187:0	0/0:0,-111.868,-1000:10000:PASS:37250:98206:27170:3:648:0:372:0	0/0:0,-132.675,-1000:10000:PASS:39101:112848:26790:3:532:16:441:0	0/0:0,-87.8488,-1000:10000:PASS:33979:91232:25073:3:556:3:292:0	0/0:0,-75.2023,-885.845:10000:PASS:27601:75060:20816:3:398:4:250:0	0/0:0,-91.0849,-1000:10000:PASS:38901:99055:25942:3:607:0:304:0	0/0:0,-61.9268,-728.815:10000:PASS:21333:56109:16028:3:304:1:206:0	0/0:0,-102.38,-1000:10000:PASS:38741:100300:27050:3:611:2:341:0	0/0:0,-23.159,-268.38:10000:PASS:14475:42004:12552:3:123:0:77:0	0/0:0,-91.7252,-1000:10000:PASS:31553:81126:22530:3:505:3:305:0	0/0:0,-169.016,-1000:10000:PASS:59830:161010:43778:3:978:4:562:0	0/0:0,-73.5987,-859.846:10000:PASS:38681:113558:35751:3:394:0:245:0	0/0:0,-133.259,-1000:10000:PASS:46528:121816:32254:3:722:1:443:0	0/0:0,-105.551,-1000:10000:PASS:39399:101629:27732:3:650:1:351:0	0/0:0,-137.142,-1000:10000:PASS:47928:124116:32671:3:765:1:456:0	0/0:0,-81.2223,-957.944:10000:PASS:29995:77723:20839:3:467:2:270:0	0/0:0,-116.108,-1000:10000:PASS:41882:108356:29562:3:684:3:386:0	0/0:0,-105.307,-1000:10000:PASS:35245:93072:24859:3:541:0:350:0
Chr01	16924549	16998619	INV00010557	74070	0.995763	0.00423729	0	0	PASS	PRECISE	INV	60	-4,4	-4,4	AAGGGATGGAAGCGAAGTGCCCCGTACATGGAAGGCAGTATGGTGACAACCAGAGCGCAATCAAAGCATCCGTAAATCCAGGGGCATCGAATTCTTTATCCGTTGGCGCTAGTTTTGAACCAAAAGAACCGAACCGAAAGGCACTGAAAGTTGTTTCGTCAGATCCACCTTCCGAACTTGA	0/0:0,-11.135,-140.697:111:PASS:5622:14608:4646:3:81:1:37:0	0/0:0,-150.493,-1000:10000:PASS:46574:116814:41397:3:835:0:501:0	0/0:0,-323.144,-1000:10000:PASS:99587:261601:83154:3:1813:4:1075:0	0/0:0,-80.7888,-933.312:10000:PASS:23799:61145:21213:3:419:0:269:0	0/0:0,-16.8506,-207.293:10000:PASS:9101:24096:7540:3:139:1:56:0	0/0:0,-72.8187,-866.869:10000:PASS:21933:57493:20531:3:280:0:242:0	0/0:0,-120.66,-1000:10000:PASS:38676:102870:36617:3:487:0:401:0	0/0:0,-214.247,-1000:10000:PASS:60571:155054:52696:3:992:2:713:0	0/0:0,-185.124,-1000:10000:PASS:58967:154541:47796:3:860:19:616:0	0/0:0,-21.9652,-269.49:10000:PASS:13557:35118:10078:3:183:2:73:0	0/0:0,-305.453,-1000:10000:PASS:91550:231884:79135:3:1514:3:1016:0	0/0:0,-119.62,-1000:10000:PASS:39455:99336:32597:3:601:5:398:0	0/0:0,-214.289,-1000:10000:PASS:116385:305614:101029:3:1898:6:713:0	0/0:0,-18.0494,-222.288:10000:PASS:10355:27436:8067:3:150:0:60:0	0/0:0,-143.088,-1000:10000:PASS:46418:121628:37535:3:746:0:476:0	0/0:0,-88.5579,-1000:10000:PASS:31499:77558:25519:3:515:2:295:0	0/0:0,-57.31,-673.313:10000:PASS:24751:89998:30924:3:328:1:191:0	0/0:0,-106.753,-1000:10000:PASS:35431:88571:30925:3:612:15:355:0	0/0:0,-103.195,-1000:10000:PASS:36739:102341:31279:3:442:10:343:0	0/0:0,-86.909,-1000:10000:PASS:31879:82656:28605:3:511:27:289:0	0/0:0,-60.4735,-715.266:10000:PASS:25236:68978:23283:3:329:41:201:0	0/0:0,-96.8316,-1000:10000:PASS:36827:89618:29409:3:610:3:323:0	0/0:0,-54.151,-637.466:10000:PASS:19602:51424:18028:3:274:26:180:0	0/0:0,-110.082,-1000:10000:PASS:36991:90404:30764:3:626:0:366:0	0/0:0,-25.2733,-300.487:10000:PASS:11528:39304:14305:3:128:0:84:0	0/0:0,-87.4345,-1000:10000:PASS:29885:73194:25620:3:489:1:291:0	0/0:0,-173.237,-1000:10000:PASS:56970:145630:49763:3:907:44:576:0	0/0:0,-71.8857,-843.24:10000:PASS:30971:105930:40755:3:400:33:239:0	0/0:0,-131.855,-1000:10000:PASS:44058:110303:36581:3:687:28:439:0	0/0:0,-111.563,-1000:10000:PASS:37407:91804:31494:3:649:5:371:0	0/0:0,-132.35,-1000:10000:PASS:45613:112208:37135:3:752:17:440:0	0/0:0,-86.0036,-1000:10000:PASS:28590:70226:23730:3:491:2:286:0	0/0:0,-115.104,-1000:10000:PASS:39901:97834:33481:3:679:1:383:0	0/0:0,-102.55,-1000:10000:PASS:33675:84181:28096:3:509:1:341:0
Chr01	16925793	17173840	INV00010565	248047	0.978814	0.0211864	0	0	PASS	PRECISE	INV	60	-2,2	-2,2	TTGAACAACTTAATAATTCCAGAAAAAATACTACGCCAAGTCAACACCTATACCCAACCTAGAGAAATAGAAGAATGGTTCCGCCCTGACACGATGTTGGTTAATCAGACATCTTTTCTTGCTCCTTAACGACCGAGGGATGAAATCTTTCGACGACTAGGGAGGCGTCACCCGAGGCCGATTCCTGTGGATCACTATAGAATCTTCTAGAAGCAAGCTAGG	0/0:0,-8.42328,-101.494:84:PASS:1936:34312:9340:6:95:0:28:0	0/0:0,-172.847,-1000:10000:PASS:8807:281881:85412:6:848:0:575:0	0/0:0,-330.475,-1000:10000:PASS:9318:604774:175655:7:1765:2:1100:0	0/0:0,-84.9506,-952.259:10000:PASS:8730:146969:43553:6:443:0:283:0	0/0:0,-20.159,-241.89:10000:PASS:2408:56350:15754:6:147:0:67:0	0/0:0,-80.9435,-964.966:10000:PASS:7086:140478:42146:6:312:0:269:0	0/0:0,-150.753,-1000:10000:PASS:6992:247674:71355:6:599:0:501:0	0/0:0,-205.692,-1000:10000:PASS:8504:366944:110067:6:992:3:684:0	0/0:0,-190.215,-1000:10000:PASS:11322:365183:97802:7:861:1:633:0	0/0:0,-19.2583,-238.992:10000:PASS:2369:83028:20471:7:162:1:64:0	0/0:0,-315.709,-1000:10000:PASS:10545:548034:164100:6:1515:3:1051:0	0/0:0,-132.259,-1000:10000:PASS:10596:235915:69210:6:627:3:441:0	0/0:0,-228.946,-1000:10000:PASS:19162:719337:210459:6:1745:2:762:0	0/0:0,-17.7537,-218.593:10000:PASS:2179:63157:17200:7:158:0:59:0	0/0:0,-148.79,-1000:10000:PASS:9662:282064:80616:6:745:2:495:0	0/0:0,-91.1116,-1000:10000:PASS:7076:187301:51177:6:491:1:303:0	0/0:0,-56.2016,-641.109:10000:PASS:6608:219656:60713:7:276:0:187:0	0/0:0,-109.423,-1000:10000:PASS:5073:218630:59291:7:628:1:364:0	0/0:0,-103.392,-1000:10000:PASS:8569:238418:60907:7:414:6:344:0	0/0:0,-93.3593,-1000:10000:PASS:6509:201448:53309:7:522:1:311:0	0/0:0,-66.618,-767.989:10000:PASS:7366:163724:41882:7:332:1:222:0	0/0:0,-103.599,-1000:10000:PASS:8338:218134:59242:6:606:1:346:0	0/1:-22.4961,0,-679.454:10000:PASS:5791:124479:33819:6:288:8:217:26	0/0:0,-117.891,-1000:10000:PASS:5928:221817:60621:7:601:3:392:0	0/0:0,-22.5657,-267.488:10000:PASS:6287:99263:28914:6:102:0:75:0	0/0:0,-87.7238,-1000:10000:PASS:5409:182248:48661:7:451:0:292:0	0/0:0,-169.565,-1000:10000:PASS:13463:353570:98580:6:845:0:564:0	0/0:0,-71.8877,-840.242:10000:PASS:5354:270390:79893:6:359:0:239:0	0/0:0,-136.451,-1000:10000:PASS:5319:270889:74526:7:722:2:454:0	0/0:0,-110.404,-1000:10000:PASS:7027:225948:61109:7:619:2:367:0	0/0:0,-135.569,-1000:10000:PASS:5454:270555:72130:7:729:1:451:0	0/0:0,-88.7196,-1000:10000:PASS:5155:175087:49841:6:490:1:295:0	0/0:0,-118.214,-1000:10000:PASS:6902:241550:64546:7:662:0:393:0	0/0:0,-98.6527,-1000:10000:PASS:6341:203714:55147:7:504:1:328:0
Chr01	16927812	17179016	INV00010571	251204	0.995763	0.00423729	0	0	PASS	PRECISE	INV	60	-5,5	-5,5	GAACATTTCTCGAAGAGACAGTCTGGGTGAGTAATTCCTCGTATAGGAAAACCTACCTAAGTATAGGAGACTCTTTTTCGAGCAAGTAGTTAAGGACTAGAATGAGTGAAGAGGAACCTTATGCTTATGTAAGAACAGGCCTGGCAAAAGAAGTACGGTCTCGCTTTCCTTTGCCACTCAAGTGTACGGCATCTGCCGTGCTTAGGCCCCTTCTTCCCTTCCCTAACCCA	0/0:0,-9.329,-116.997:93:PASS:9375:34673:8340:4:104:0:31:0	0/0:0,-137.069,-1000:10000:PASS:73564:287290:75345:4:863:1:456:0	0/0:0,-271.962,-1000:10000:PASS:160301:616333:154530:4:1668:2:905:0	0/0:0,-73.0837,-849.633:10000:PASS:37887:149643:38416:4:429:1:243:0	0/0:0,-16.8363,-213.179:10000:PASS:15180:57088:13956:4:172:1:56:0	0/0:0,-74.3248,-886.97:10000:PASS:34665:143465:37019:4:311:0:247:0	0/0:0,-123.375,-1000:10000:PASS:61077:252384:62775:4:528:0:410:0	0/0:0,-177.894,-1000:10000:PASS:95737:373641:97165:4:947:1:592:0	0/0:0,-166.22,-1000:10000:PASS:90130:372217:85879:4:874:1:553:0	0/0:0,-22.8732,-293.795:10000:PASS:21287:84080:18214:4:215:0:76:0	0/0:0,-275.246,-1000:10000:PASS:145982:558589:144661:4:1517:1:916:0	0/0:0,-115.499,-1000:10000:PASS:63570:239745:61291:4:631:5:384:0	0/0:0,-205.094,-1000:10000:PASS:188681:732764:185528:4:1826:3:682:0	0/0:0,-17.4493,-218.29:10000:PASS:17314:63911:15357:4:196:2:58:0	0/0:0,-134.44,-1000:10000:PASS:75693:286491:71490:4:782:3:447:0	0/0:0,-91.1212,-1000:10000:PASS:47820:190423:45266:4:514:1:303:0	0/0:0,-108.604,-1000:10000:PASS:39531:226638:53261:5:628:1:361:0	0/0:0,-103.167,-1000:10000:PASS:54119:222737:51997:4:645:1:343:0	0/0:0,-90.8202,-1000:10000:PASS:57369:243020:53277:4:373:6:302:0	0/0:0,-93.2224,-1000:10000:PASS:48607:205410:46578:4:547:2:310:0	0/0:0,-65.8745,-772.849:10000:PASS:38417:167484:36344:4:379:5:219:0	0/0:0,-94.0986,-1000:10000:PASS:56001:222189:51823:4:610:0:313:0	0/0:0,-53.7823,-638.198:10000:PASS:29718:127502:29281:4:287:3:179:0	0/0:0,-105.569,-1000:10000:PASS:55560:226102:53106:4:620:2:351:0	0/0:0,-47.2372,-562.276:10000:PASS:18882:102400:25567:5:261:1:157:0	0/0:0,-80.6004,-945.224:10000:PASS:45252:185709:42630:4:479:1:268:0	0/0:0,-170.593,-1000:10000:PASS:86341:361014:86425:4:950:1:567:0	0/0:0,-130.24,-1000:10000:PASS:49702:279468:70261:5:733:1:433:0	0/0:0,-124.676,-1000:10000:PASS:67162:276279:65341:4:731:0:415:0	0/0:0,-104.966,-1000:10000:PASS:56621:230147:53663:4:636:4:349:0	0/0:0,-115.81,-1000:10000:PASS:69126:275923:62848:4:704:0:385:0	0/0:0,-82.7153,-984.732:10000:PASS:43220:178686:43717:4:481:13:275:0	0/0:0,-106.136,-1000:10000:PASS:60151:246018:56546:4:705:4:353:0	0/0:0,-100.491,-1000:10000:PASS:50878:207395:48490:4:539:1:334:0
Chr01	16929573	17062512	INV00010582	132939	0.995763	0.00423729	0	0	PASS	PRECISE	INV	60	-6,6	-6,6	CCTGGGTAGTACCAGGACCCTTGTGCCCCGGACTGCACTGCCCGCCCTATGACCCAAAACTCAAAACGAGCCTTGCGACGAGACGCGGACATTCCTCATGCTGCGGTTCCCTACCCTTCGCTTCAGGCCATAGTGCTTCTGAATTATTTCTATACCCCTTTGATGATGCAGCCTCTGACTCTCCTGGGTAAACTCCTACTTGATTAGTTATGATGTC	0/0:0,-8.42582,-103.297:84:PASS:9868:22423:4845:3:83:1:28:0	0/0:0,-131.236,-1000:10000:PASS:77254:185045:41257:3:749:0:437:0	0/0:0,-273.216,-1000:10000:PASS:167578:400024:86495:3:1570:0:910:0	0/0:0,-63.7696,-709.45:10000:PASS:39841:95896:21591:3:394:0:213:0	0/0:0,-11.4177,-136.179:114:PASS:15922:36769:7937:3:123:1:38:0	0/0:0,-68.3069,-815.073:10000:PASS:36766:91882:21009:3:296:0:227:0	0/0:0,-119.461,-1000:10000:PASS:64724:163125:35267:3:498:0:397:0	0/0:0,-181.07,-1000:10000:PASS:100332:242456:52762:3:924:1:603:0	0/0:0,-167.43,-1000:10000:PASS:94174:236757:48295:3:820:1:559:0	0/0:0,-19.2584,-235.392:10000:PASS:22224:53067:10529:3:174:0:64:0	0/0:0,-256.026,-1000:10000:PASS:152943:362505:78565:3:1350:2:853:0	0/0:0,-104.029,-1000:10000:PASS:66472:153879:34056:3:575:3:347:0	0/0:0,-188.616,-1000:10000:PASS:198038:474932:105762:3:1606:6:628:0	0/0:0,-16.2448,-200.689:10000:PASS:18139:41439:8921:3:156:0:54:0	0/0:0,-119.988,-1000:10000:PASS:78970:184953:40278:3:656:0:399:0	0/0:0,-73.9242,-827.771:10000:PASS:50041:120694:23083:3:416:1:246:0	0/0:0,-97.6286,-1000:10000:PASS:42337:147619:29173:4:557:1:325:0	0/0:0,-84.8117,-959.62:10000:PASS:56681:139899:28072:3:528:1:283:0	0/0:0,-103.743,-1000:10000:PASS:59790:156683:31349:3:460:8:345:0	0/0:0,-74.9823,-855.125:10000:PASS:50963:130563:24679:3:464:9:250:0	0/0:0,-70.0303,-800.89:10000:PASS:40473:109611:20722:4:379:2:233:0	0/0:0,-79.257,-862.184:10000:PASS:58645:139619:27599:3:498:0:265:0	0/0:0,-61.045,-712.336:10000:PASS:31145:82046:16141:3:318:1:203:0	0/0:0,-92.4888,-1000:10000:PASS:58164:142220:28148:3:533:1:308:0	0/0:0,-40.8509,-474.011:10000:PASS:20007:66365:13720:4:215:1:136:0	0/0:0,-65.2196,-737.696:10000:PASS:47346:116422:22910:3:376:2:217:0	0/0:0,-146.763,-1000:10000:PASS:90330:228610:46666:3:807:2:488:0	0/0:0,-122.918,-1000:10000:PASS:52780:180484:37694:4:715:1:409:0	0/0:0,-107.485,-1000:10000:PASS:70266:172584:34755:3:620:0:358:0	0/0:0,-95.6197,-1000:10000:PASS:59298:144742:28551:3:566:1:319:0	0/0:0,-101.09,-1000:10000:PASS:72030:174633:32308:3:545:2:337:0	0/0:0,-75.0222,-855.365:10000:PASS:45275:110739:23359:3:421:0:250:0	0/0:0,-100.051,-1000:10000:PASS:63019:154109:30015:3:580:2:333:0	0/0:0,-84.5292,-985.74:10000:PASS:53364:131523:25533:3:471:0:281:0
Chr01	16941026	17055669	DUP00004624	114643	0.995763	0.00423729	0	0	PASS	PRECISE	DUP	60	-4,4	-4,4	GGTCAATCGAGAAAACTATTTCTGTATAGGGGCAGCCGGGCCGTATTAGCAAGCGTGACGTGCCGGACTGACCCAGCACGTCTTTCTTTCCTGGCAACAGAAGATTGCCTCCAAGAAACCCACTCCGCCTAAAGAGTCCTATTCCTATCCGGTCTACATTCACTATTCTTTGCTCTACCCTCACACACCCAGGCCTAGGAGATAATGAGATGG	0/0:0,-8.12417,-99.9964:81:PASS:10624:18949:5949:2:65:0:27:0	0/0:0,-123.384,-1000:10000:PASS:87477:154170:50410:2:726:0:411:0	0/0:0,-239.604,-1000:10000:PASS:186388:335949:105090:2:1414:3:798:0	0/0:0,-60.1264,-677.42:10000:PASS:45228:79668:26391:2:351:0:200:0	0/0:0,-13.839,-170.392:138:PASS:17114:31113:9740:2:104:0:46:0	0/0:0,-88.166,-1000:10000:PASS:41737:76532:25703:2:340:0:293:0	0/0:0,-151.661,-1000:10000:PASS:73735:136591:43014:2:597:0:504:0	0/0:0,-151.528,-1000:10000:PASS:113576:202528:64532:2:771:0:504:0	0/0:0,-163.187,-1000:10000:PASS:108035:198539:59264:2:850:1:544:0	0/0:0,-18.3564,-226.894:10000:PASS:24456:45001:13001:2:149:0:61:0	0/0:0,-225.399,-1000:10000:PASS:171484:303018:95827:2:1256:3:750:0	0/0:0,-92.8682,-1000:10000:PASS:73744:128517:41603:2:486:0:309:0	0/0:0,-196.363,-1000:10000:PASS:218353:399584:129030:2:1773:1:653:0	0/0:0,-14.7171,-180.367:147:PASS:19268:35225:10929:2:129:0:49:0	0/0:0,-118.319,-1000:10000:PASS:86961:155323:49066:2:631:2:394:0	0/0:0,-77.4942,-870.929:10000:PASS:55971:102250:28787:2:420:0:258:0	0/0:0,-105.289,-1000:10000:PASS:49678:124752:36301:3:576:0:350:0	0/0:0,-98.3174,-1000:10000:PASS:63117:118563:34833:2:569:1:327:0	0/0:0,-113.97,-1000:10000:PASS:65452:133984:38761:3:477:0:379:0	0/0:0,-90.52,-1000:10000:PASS:56996:111135:30683:3:524:0:301:0	0/0:0,-78.1708,-901.003:10000:PASS:44825:93447:26077:3:432:0:260:0	0/0:0,-86.5368,-964.44:10000:PASS:65194:118082:34508:2:535:0:288:0	0/0:0,-56.2402,-652.848:10000:PASS:35211:69368:20099:3:326:0:187:0	0/0:0,-100.768,-1000:10000:PASS:65722:120018:34982:2:557:0:335:0	0/0:0,-46.0221,-538.365:10000:PASS:22382:56168:17174:3:253:0:153:0	0/0:0,-83.5756,-957.489:10000:PASS:52735:98677:28783:2:462:1:278:0	0/0:0,-170.88,-1000:10000:PASS:101476:192937:58307:2:901:0:568:0	0/0:0,-120.509,-1000:10000:PASS:60353:152923:47021:3:695:0:401:0	0/0:0,-117.136,-1000:10000:PASS:78268:145989:43317:2:642:0:390:0	0/0:0,-98.9488,-1000:10000:PASS:66512:122348:35556:2:606:0:329:0	0/0:0,-119.657,-1000:10000:PASS:80111:148237:40529:2:653:0:398:0	0/0:0,-83.617,-977.731:10000:PASS:50570:93399:29086:2:451:0:278:0	0/0:0,-99.2641,-1000:10000:PASS:70555:130699:37328:2:596:0:330:0	0/0:0,-96.0959,-1000:10000:PASS:60165:111134:31874:2:477:0:320:0
Chr01	16946170	17076374	INV00010668	130204	0.995763	0.00423729	0	0	PASS	PRECISE	INV	60	-6,6	-6,6	GGAACGTCAAGCCCCGGATAAGATTGTTAAAAATCGATGCACTTGACCCATCAGAAACCAGTATTGGACAGTGTGAAGTGACAATTTCCGATTCCCGAGTGTTGAGAAATACTGGTTTATTGAGTCAAAGCAGAGTGACCTGCGGCCTGGTGTTAGCAGGCTGAGGACACCAAACAAAAGCTGGAAAAATAAGA	0/0:0,-7.22239,-89.9977:72:PASS:11838:20840:4837:2:85:0:24:0	0/0:0,-146.288,-1000:10000:PASS:97107:174238:37682:3:853:5:487:0	0/0:0,-327.244,-1000:10000:PASS:208311:374636:81464:3:1894:3:1090:0	0/0:0,-81.132,-916.054:10000:PASS:50267:90040:19915:3:443:1:270:0	0/0:0,-13.5411,-167.695:135:PASS:19118:34083:8038:3:121:1:45:0	0/0:0,-87.2649,-1000:10000:PASS:46343:87448:18692:3:340:0:290:0	0/0:0,-147.448,-1000:10000:PASS:82067:154323:32442:3:615:0:490:0	0/0:0,-196.097,-1000:10000:PASS:126271:227126:48968:3:1032:0:652:0	0/0:0,-185.659,-1000:10000:PASS:120208:221208:43532:3:904:1:618:0	0/0:0,-18.9546,-228.69:10000:PASS:27197:49246:10143:3:163:0:63:0	0/0:0,-296.297,-1000:10000:PASS:190334:340559:72764:3:1509:4:986:0	0/0:0,-126.605,-1000:10000:PASS:82168:143213:33150:2:682:7:421:0	0/0:0,-222.949,-1000:10000:PASS:243337:448571:97651:3:2004:7:742:0	0/0:0,-18.3541,-223.991:10000:PASS:21622:38514:8983:3:171:0:61:0	0/0:0,-151.945,-1000:10000:PASS:97394:172216:39340:3:849:5:506:0	0/0:0,-83.8115,-952.923:10000:PASS:62075:112871:22162:3:510:1:280:0	0/0:0,-105.593,-1000:10000:PASS:57086:139015:25111:3:665:0:352:0	0/0:0,-103.039,-1000:10000:PASS:69875:132184:26465:3:629:0:343:0	0/0:0,-155.246,-1000:10000:PASS:73805:148198:28359:3:621:13:516:0	0/0:0,-92.325,-1000:10000:PASS:63423:122987:23542:3:556:4:307:0	0/0:0,-87.1463,-1000:10000:PASS:50642:104322:17909:3:438:4:290:0	0/0:0,-44.0339,-1000:10000:PASS:72114:131372:25967:3:636:11:340:18	0/0:0,-65.5594,-765.335:10000:PASS:39634:77699:14100:3:299:0:218:0	0/0:0,-106.406,-1000:10000:PASS:72705:133829:26401:3:609:1:354:0	0/0:0,-56.0888,-663.396:10000:PASS:25749:62815:12201:3:278:0:187:0	0/0:0,-75.1737,-874.716:10000:PASS:58501:109865:22085:3:471:2:250:0	0/0:0,-168.433,-1000:10000:PASS:112649:216520:42452:3:939:1:560:0	0/0:0,-138.476,-1000:10000:PASS:68950:172274:32659:3:792:1:461:0	0/0:0,-115.86,-1000:10000:PASS:86877:163089:32808:3:689:1:386:0	0/0:0,-103.999,-1000:10000:PASS:73576:136283:27051:3:633:2:346:0	0/0:0,-124.283,-1000:10000:PASS:88660:163641:31836:3:720:1:414:0	0/0:0,-81.8355,-969.855:10000:PASS:56025:105191:21239:3:482:3:272:0	0/0:0,-25.0878,-1000:10000:PASS:78067:145169:29744:3:659:15:342:23	0/0:0,-104.036,-1000:10000:PASS:66550:123914:23711:3:540:0:346:0
Chr01	16946348	17065707	INV00010671	119359	0.970339	0.029661	0	0	PASS	PRECISE	INV	60	-6,6	-6,6	ATCTGTCCTTTTTGCTACTTTCGAGCTCCCTTCAACTCGACTTGCTTTTCTCCTCTGCTGAATTCTTTAATGCATTCATGTCTAAATGCAAAGGCCCGAGACTCTTCATCCAAACGCAAAGCGACCTTTCATTCCCTTGTTTCGTCGTGGCACACCCCCCCACAAGCACCCCCAGGCGAAGGGGAGACCAGAAAACGCCTTTCGTTTTCCCTCCTTCAGCAGCCCTCACC	0/0:0,-7.21721,-88.9925:72:PASS:10551:19808:4190:3:72:0:24:0	0/0:0,-115.416,-1000:10000:PASS:89384:161963:34910:3:627:0:384:0	0/0:0,-259.43,-1000:10000:PASS:190047:349777:73893:3:1342:2:863:0	0/0:0,-61.623,-691.312:10000:PASS:46121:83707:18348:3:334:1:205:0	0/0:0,-10.8335,-134.096:108:PASS:17191:32460:6851:3:99:1:36:0	0/0:0,-74.9238,-887.367:10000:PASS:42708:80903:17599:3:293:0:249:0	0/0:0,-116.447,-1000:10000:PASS:75635:143218:29708:3:472:0:387:0	0/0:0,-161.306,-1000:10000:PASS:115983:212032:44904:3:781:0:537:0	0/0:0,-151.8,-1000:10000:PASS:110499:206955:40960:3:682:0:505:0	0/0:0,-16.3793,-198.123:10000:PASS:24500:46953:8955:3:133:0:55:0	0/0:0,-239.758,-1000:10000:PASS:174370:316874:67065:3:1171:1:798:0	0/0:0,-100.24,-1000:10000:PASS:74941:134599:28971:3:466:5:334:0	0/0:0,-188.71,-1000:10000:PASS:221920:418123:90349:3:1503:7:628:0	0/0:0,-17.1514,-211.293:10000:PASS:19262:36667:7686:3:139:1:57:0	0/0:0,-118.238,-1000:10000:PASS:88197:161840:34435:3:609:0:394:0	0/0:0,-65.8195,-732.794:10000:PASS:57093:106592:19493:3:419:3:219:0	0/0:0,-99.4529,-1000:10000:PASS:51197:130577:24494:3:561:0:331:0	0/0:0,-85.8548,-987.26:10000:PASS:64256:124393:23647:3:505:0:286:0	0/0:0,-88.6303,-1000:10000:PASS:67754:139666:26196:3:472:11:295:0	0/0:0,-82.1147,-953.534:10000:PASS:58204:115975:20758:3:465:5:273:0	0/0:0,-62.5401,-709.026:10000:PASS:46197:97880:17203:3:361:2:208:0	0/0:0,-107.42,-1000:10000:PASS:66311:123906:23137:3:534:1:358:0	0/0:0,-52.006,-607.428:10000:PASS:36425:72500:13434:3:254:6:173:0	0/0:0,-94.3769,-1000:10000:PASS:67010:125754:23700:3:529:3:314:0	0/0:0,-39.5691,-455.633:10000:PASS:22813:59180:11569:3:208:0:132:0	0/0:0,-67.0441,-756.814:10000:PASS:53739:103599:19259:3:371:0:223:0	0/0:0,-144.333,-1000:10000:PASS:103893:202917:39278:3:770:1:480:0	0/0:0,-116.98,-1000:10000:PASS:61381:161555:31669:3:661:1:389:0	0/0:0,-104.25,-1000:10000:PASS:79810:153137:29262:3:593:0:347:0	0/0:0,-87.5265,-1000:10000:PASS:67662:128198:24129:3:538:1:291:0	0/0:0,-107.196,-1000:10000:PASS:81707:154751:27167:3:603:4:357:0	0/0:0,-74.9019,-877.745:10000:PASS:51658:98571:19566:3:426:0:249:0	0/0:0,-93.7945,-1000:10000:PASS:71877:136766:25338:3:537:2:312:0	0/0:0,-87.2281,-1000:10000:PASS:61418:116374:21470:3:446:0:290:0
Chr01	16946842	17044834	INV00010675	97992	0.995763	0.00423729	0	0	PASS	PRECISE	INV	60	-2,2	-2,2	CGTTCCCCTCTACTTTCAGTGAGAAATCCTGTGATAAGTTTTAAGAAGTCGATCGCTCATCGCTTCGGCTCGTCGTGCCGTCTCATCATCTTTGGTTTCTTACTTGGTTTCTCCTGCTTCCGTTGGGATAAATTTCATCATCAGATGGGATGTAGATACTACCGCCCCTATCGCATTCAACGTTCCTCGTCCCAGAATCGCATTATA	0/0:0,-8.12526,-100.597:81:PASS:8774:15340:8533:2:69:0:27:0	0/0:0,-135.969,-1000:10000:PASS:74778:124859:71009:2:714:0:453:0	0/0:0,-295.369,-1000:10000:PASS:158365:273314:147993:2:1566:1:987:0	0/0:0,-59.0393,-653.936:10000:PASS:38744:64524:36943:2:362:1:197:0	0/0:0,-13.2403,-161.595:132:PASS:14327:25212:13900:2:118:0:44:0	0/0:0,-74.0222,-882.469:10000:PASS:35937:61626:36336:2:294:0:246:0	0/0:0,-138.72,-1000:10000:PASS:63788:110229:61833:2:531:0:461:0	0/0:0,-174.97,-1000:10000:PASS:97477:164174:91437:2:886:0:583:0	0/0:0,-164.037,-1000:10000:PASS:94420:161980:84713:2:807:1:547:0	0/0:0,-18.3561,-225.493:10000:PASS:20909:36612:19027:2:155:0:61:0	0/0:0,-247.268,-1000:10000:PASS:145309:246008:135992:2:1256:1:825:0	0/0:0,-113.911,-1000:10000:PASS:62404:104018:58651:2:575:1:380:0	0/0:0,-230.097,-1000:10000:PASS:184626:324356:181594:2:1774:3:766:0	0/0:0,-17.7533,-214.592:10000:PASS:16021:28460:15656:2:148:0:59:0	0/0:0,-134.705,-1000:10000:PASS:73362:125947:69209:2:762:0:450:0	0/0:0,-85.601,-959.307:10000:PASS:48691:83045:42338:2:503:1:285:0	0/0:0,-113.956,-1000:10000:PASS:40969:101198:52913:2:661:1:379:0	0/0:0,-91.1404,-1000:10000:PASS:54939:96921:50320:2:592:0:303:0	0/0:0,-146.187,-1000:10000:PASS:58010:109312:55523:2:567:17:486:0	0/0:0,-92.5566,-1000:10000:PASS:49505:90928:45006:2:519:1:308:0	0/0:0,-84.1152,-957.927:10000:PASS:39478:76715:37763:2:413:1:280:0	0/0:0,-95.7137,-1000:10000:PASS:56674:96007:50125:2:591:0:319:0	0/0:0,-60.4519,-694.245:10000:PASS:30925:56443:29042:2:295:2:201:0	0/0:0,-104.366,-1000:10000:PASS:57045:97849:50719:2:552:0:347:0	0/0:0,-53.1963,-631.714:10000:PASS:18082:45419:24926:2:260:0:177:0	0/0:0,-74.0529,-850.299:10000:PASS:45651:80389:41825:2:432:1:247:0	0/0:0,-161.083,-1000:10000:PASS:88872:158576:82298:2:876:1:536:0	0/0:0,-129.613,-1000:10000:PASS:48561:124717:67459:2:751:2:431:0	0/0:0,-123.586,-1000:10000:PASS:68188:119101:62341:2:687:0:411:0	0/0:0,-113.549,-1000:10000:PASS:57727:99550:51839:2:657:2:378:0	0/0:0,-128.835,-1000:10000:PASS:69463:121461:59458:2:718:1:429:0	0/0:0,-79.4061,-926.234:10000:PASS:43910:75969:41474:2:466:1:264:0	0/0:0,-122.51,-1000:10000:PASS:61252:106644:54489:2:651:1:408:0	0/0:0,-98.6617,-1000:10000:PASS:52544:90788:46316:2:521:0:328:0
Chr01	16961097	17069060	DEL00007826	107963	0.949153	0.0508475	0	0	PASS	PRECISE	DEL	60	-3,3	-3,3	TTATCTATAGATAGGTCTTCCATACTTTATTAGAAATGAAATTGAGTATCCGGTAAATCATTCCATCAAGCCAGTAAGCTAACCTTTTATGACCCACGGCAGCAATCCTACCTTTCAGGGAGCTACTTCTACCACGGCTGACACATTATCTCCACAAAGACCAACGACCCATCCCGAAGAGAAGTTGACTGACGGGGATGTCTCGAGAAGAAATTCCAGA	0/0:0,-7.22116,-88.7964:72:PASS:10824:17178:3627:2:100:0:24:0	0/0:0,-142.48,-1000:10000:PASS:89524:143561:28650:2:788:1:476:0	0/0:0,-306.004,-1000:10000:PASS:194841:304665:61265:2:1767:5:1019:0	0/0:0,-77.843,-872.176:10000:PASS:46779:73873:15134:2:443:1:259:0	0/0:0,-15.9482,-196.094:157:PASS:17987:27764:5987:2:174:0:53:0	0/0:0,-74.9277,-895.571:10000:PASS:43511:72510:13976:3:291:2:249:0	0/0:0,-125.477,-1000:10000:PASS:77854:127452:23595:3:530:4:417:0	0/0:0,-192.412,-1000:10000:PASS:118934:185908:36955:2:923:1:641:0	0/0:0,-86.3209,-1000:10000:PASS:120353:177254:33666:2:940:3:618:30	0/0:0,-7.46899,-290.379:75:PASS:26974:39580:7783:2:240:0:83:5	0/0:0,-282.564,-1000:10000:PASS:175921:279566:54639:2:1432:6:941:0	0/0:0,-124.132,-1000:10000:PASS:75833:117224:24615:2:665:3:413:0	0/0:0,-219.324,-1000:10000:PASS:229965:365131:74568:2:1920:1:730:0	0/0:0,-17.7536,-218.793:10000:PASS:20278:31159:6694:2:190:1:59:0	0/0:0,-144.766,-1000:10000:PASS:90675:139914:29219:2:814:3:482:0	0/0:0,-25.9936,-999.357:10000:PASS:60830:91711:16209:2:561:4:313:22	0/0:0,-121.191,-1000:10000:PASS:56079:112615:20047:3:652:0:403:0	0/0:0,-103.712,-1000:10000:PASS:69735:106838:19701:2:638:1:345:0	0/0:0,-120.918,-1000:10000:PASS:77660:117612:21825:2:574:1:402:0	0/0:0,-103.493,-1000:10000:PASS:63538:99430:17071:2:597:1:344:0	0/0:0,-88.1225,-1000:10000:PASS:52305:83277:14094:3:476:0:293:0	0/0:0,-103.801,-1000:10000:PASS:70801:106654:19239:2:643:2:346:0	0/0:0,-60.1318,-689.126:10000:PASS:40709:61588:10839:2:317:0:200:0	0/0:0,-111.893,-1000:10000:PASS:71071:108919:19404:2:625:3:372:0	0/1:-14.7341,0,-547.11:147:PASS:24343:51396:9660:3:291:2:168:20	0/0:0,-86.2903,-990.995:10000:PASS:57102:89817:16028:2:485:1:287:0	0/0:0,-184.729,-1000:10000:PASS:114429:174127:32015:2:1037:3:614:0	0/0:0,-152.768,-1000:10000:PASS:66887:139924:26039:3:823:1:508:0	0/0:0,-143.153,-1000:10000:PASS:87235:131268:24030:2:806:0:476:0	0/0:0,-109.19,-1000:10000:PASS:72023:110884:19954:2:680:1:363:0	0/0:0,-120.32,-1000:10000:PASS:88502:132010:22417:2:685:1:400:0	0/0:0,-90.212,-1000:10000:PASS:54983:85633:16007:2:531:0:300:0	0/0:0,-119.679,-1000:10000:PASS:76302:118523:21021:2:700:3:398:0	0/0:0,-43.7347,-1000:10000:PASS:65840:100839:17523:2:576:2:363:20
Chr01	16965759	17053335	DEL00007853	87576	0.995763	0.00423729	0	0	PASS	PRECISE	DEL	60	-3,3	-3,3	AATTCCCGCCCCCTTGTAAATCCAATCCCGGAACTACAGCTGAAAAGGATCGTGCAGTGGATGTGTCGGGTTCGAAACTTGCTCCCCCACGTTCGTAACGATTTTTTTCTTTTTATGGCTGGGTGGGCAAGAAAAGGATTTGACTCTTGAAGATATCAACTCATACGCCTGCTCCATACATTAAAAAACATTT	0/0:0,-10.5317,-128.796:105:PASS:9963:13105:6487:2:98:0:35:0	0/0:0,-137.317,-1000:10000:PASS:80923:107434:55223:2:766:0:457:0	0/0:0,-316.46,-1000:10000:PASS:178635:229178:114857:2:1730:6:1054:0	0/0:0,-72.165,-807.418:10000:PASS:42455:55358:28680:2:379:0:240:0	0/0:0,-17.0123,-204.154:10000:PASS:16723:21021:10584:2:142:0:57:0	0/0:0,-77.031,-916.267:10000:PASS:39568:53586:28083:2:314:8:256:0	0/0:0,-128.187,-1000:10000:PASS:71041:95225:47174:2:520:5:426:0	0/0:0,-197.171,-1000:10000:PASS:107796:139416:70665:2:939:0:656:0	0/0:0,-185.78,-1000:10000:PASS:105807:132747:65061:2:906:1:619:0	0/0:0,-27.9788,-343.983:10000:PASS:23765:29945:14250:2:224:0:93:0	0/0:0,-275.78,-1000:10000:PASS:159735:209813:105137:2:1403:1:917:0	0/0:0,-115.447,-1000:10000:PASS:69227:88067:45221:2:590:1:385:0	0/0:0,-217.186,-1000:10000:PASS:210793:272687:140885:2:1826:4:723:0	0/0:0,-19.2307,-229.865:10000:PASS:18820:23551:11913:2:184:0:64:0	0/0:0,-137.079,-1000:10000:PASS:83233:105344:53439:2:745:1:457:0	0/0:0,-95.8029,-1000:10000:PASS:52633:69679:31714:2:527:0:319:0	0/0:0,-117.462,-1000:10000:PASS:57128:84652:40035:2:633:1:391:0	0/0:0,-103.474,-1000:10000:PASS:60189:81324:38064:2:605:0:344:0	0/0:0,-123.131,-1000:10000:PASS:69590:87610:42256:2:639:1:410:0	0/0:0,-103.112,-1000:10000:PASS:55711:75837:33791:2:598:2:343:0	0/0:0,-90.4446,-1000:10000:PASS:45889:62631:28775:2:472:2:301:0	0/0:0,-112.386,-1000:10000:PASS:60824:80499:37863:2:628:0:374:0	0/0:0,-60.0606,-682.055:10000:PASS:35458:46098:22204:2:311:0:200:0	0/0:0,-113.997,-1000:10000:PASS:61419:82379:38443:2:624:1:379:0	0/1:-31.4026,0,-620.283:10000:PASS:24491:38699:18900:2:282:19:192:28	0/0:0,-93.5307,-1000:10000:PASS:49025:68190:31676:2:491:0:311:0	0/0:0,-174.969,-1000:10000:PASS:99533:130003:63778:2:928:3:582:0	0/0:0,-133.536,-1000:10000:PASS:66778:105436:51549:2:721:2:444:0	0/0:0,-130.848,-1000:10000:PASS:75343:98537:47580:2:714:2:435:0	0/0:0,-114.891,-1000:10000:PASS:62283:83990:39135:2:652:2:382:0	0/0:0,-138.963,-1000:10000:PASS:76282:100385:44644:2:735:0:462:0	0/0:0,-81.113,-949.835:10000:PASS:47455:64016:31817:2:474:1:270:0	0/0:0,-121.868,-1000:10000:PASS:65732:90350:40996:2:683:1:406:0	0/0:0,-107.378,-1000:10000:PASS:56873:76147:35108:2:520:3:357:0
Chr01	16972357	17167181	DEL00007874	194824	0.991525	0.00847458	0	0	PASS	PRECISE	DEL	60	-1,1	-1,1	AGGGAAAGAAGAGGGTCTGAAATACAACTATGTCTACGAGTGCCGCGAATGAACCTTCAGTTCTTCCCAAGAACAAGGAGACACGAACTAAATAACTCGTATCAGGCTACGGACGATAGACGACGTCAGCCGAAGCGTTATTTCGGAGGCATACCCCTTGGTTGAATGGGAAAATAAAAAGCAGCGGTATAACTCTAAATTTTGGACACCTCTCCACA	0/0:0,-12.6363,-151.293:126:PASS:19398:22478:9629:2:104:0:42:0	0/0:0,-156.787,-1000:10000:PASS:153460:188065:86816:2:824:0:522:0	0/0:0,-321.938,-1000:10000:PASS:341204:394509:178797:2:1741:2:1072:0	0/0:0,-80.841,-909.364:10000:PASS:79870:97833:43958:2:423:0:269:0	0/0:0,-19.5417,-237.575:10000:PASS:31893:36634:16014:2:164:0:65:0	0/0:0,-74.3257,-890.271:10000:PASS:74064:94489:42901:2:290:2:247:0	0/0:0,-144.736,-1000:10000:PASS:131940:165147:72530:2:554:5:481:0	0/0:0,-200.656,-1000:10000:PASS:202632:241904:112169:2:955:1:668:0	0/0:0,-202.267,-1000:10000:PASS:199718:239487:99569:2:927:1:673:0	0/0:0,-33.7027,-418.587:10000:PASS:46155:54188:21115:2:257:0:112:0	0/0:0,-305.174,-1000:10000:PASS:305139:362059:166860:2:1461:2:1016:0	0/0:0,-131.352,-1000:10000:PASS:131790:155567:70439:2:615:1:437:0	0/0:0,-232.525,-1000:10000:PASS:400211:474154:212848:2:1882:3:774:0	0/0:0,-19.8587,-244.991:10000:PASS:36549:40668:17554:2:211:0:66:0	0/0:0,-153.834,-1000:10000:PASS:159643:183991:81953:2:790:1:513:0	0/0:0,-96.0507,-1000:10000:PASS:101347:124627:52072:2:537:2:320:0	0/0:0,-57.1646,-675.369:10000:PASS:105224:146902:60841:2:312:0:190:0	0/0:0,-110.04,-1000:10000:PASS:114973:147279:60374:2:652:2:366:0	0/0:0,-142.287,-1000:10000:PASS:129776:155934:61665:2:596:1:473:0	0/0:0,-9.00696,-1000:90:PASS:105985:134602:54451:2:587:35:369:31	0/0:0,-86.5404,-1000:10000:PASS:87619:107490:42203:2:448:15:288:0	0/0:0,-106.816,-1000:10000:PASS:117793:145352:60807:2:653:2:356:0	0/0:0,-65.499,-753.474:10000:PASS:66783:82140:34064:2:309:8:218:0	0/0:0,-118.8,-1000:10000:PASS:117698:148868:61928:2:621:4:396:0	0/0:0,-28.2812,-337.784:10000:PASS:47059:67844:28766:2:138:1:94:0	0/0:0,-89.8888,-1000:10000:PASS:95090:123595:49867:2:481:0:299:0	0/0:0,-186.052,-1000:10000:PASS:188303:235753:100321:2:966:42:619:0	0/0:0,-71.8355,-838.389:10000:PASS:125926:185403:79910:2:340:0:239:0	0/0:0,-149.455,-1000:10000:PASS:143683:181322:76193:2:770:7:497:0	0/0:0,-119.915,-1000:10000:PASS:119527:152275:62255:2:701:1:399:0	0/0:0,-145.21,-1000:10000:PASS:146464:179926:73725:2:764:0:483:0	0/0:0,-92.9438,-1000:10000:PASS:91294:118316:51205:2:533:2:309:0	0/0:0,-138.043,-1000:10000:PASS:126495:163475:65777:2:744:0:459:0	0/0:0,-115.658,-1000:10000:PASS:108751:136249:56120:2:543:7:385:0
Chr01	16974007	17183623	INV00010839	209616	0.995763	0.00423729	0	0	PASS	PRECISE	INV	60	-4,4	-4,4	TATTATTTAAGTGCTTATTGCTTGCCAAAAATCCTACTTCTACAATTGGTAGGTCACCGGGTTATTCAAATAAGTCGTGTTTTCTGTGCTTTTCCCATGTTACAACTTCCGTACCAATTTCTGAGCGGTAGAACAAAAGAGGATTTTGACTGATTAGCAGAAGATTCTCAGGCTGATTCCGCACCTTCTTCTCCTCGAAAGCTACAACTAGAAAATATATTCTTCTT	0/0:0,-7.52281,-92.7971:75:PASS:19791:25382:7204:2:87:0:25:0	0/0:0,-129.618,-1000:10000:PASS:156322:213628:66047:2:737:0:431:0	0/0:0,-300.359,-1000:10000:PASS:348105:447093:135527:2:1727:4:1000:0	0/0:0,-70.655,-810.513:10000:PASS:81409:110686:33741:2:362:1:235:0	0/0:0,-17.454,-216.694:10000:PASS:32608:41531:12063:2:129:1:58:0	0/0:0,-74.9265,-892.07:10000:PASS:75682:106850:32583:2:298:1:249:0	0/0:0,-135.706,-1000:10000:PASS:134739:186171:55254:2:536:0:451:0	0/0:0,-186.793,-1000:10000:PASS:206562:274742:85015:2:934:2:622:0	0/0:0,-168.779,-1000:10000:PASS:203863:269406:74783:2:854:1:562:0	0/0:0,-21.3632,-266.59:10000:PASS:47233:60629:15690:2:175:1:71:0	0/0:0,-268.787,-1000:10000:PASS:311030:411303:126550:2:1423:2:894:0	0/0:0,-110.941,-1000:10000:PASS:134250:176714:53471:2:598:7:369:0	0/0:0,-199.993,-1000:10000:PASS:408589:536267:161827:2:1819:6:665:0	0/0:0,-17.151,-215.092:10000:PASS:37303:45993:13256:2:168:0:57:0	0/0:0,-136.757,-1000:10000:PASS:162845:208140:62498:2:750:2:455:0	0/0:0,-88.2877,-993.785:10000:PASS:103630:140416:39315:2:508:0:294:0	0/0:0,-102.826,-1000:10000:PASS:107843:164896:46522:2:558:0:342:0	0/0:0,-104.003,-1000:10000:PASS:117473:165798:45432:2:600:0:346:0	0/0:0,-152.231,-1000:10000:PASS:133118:173766:46703:2:599:14:506:0	0/0:0,-97.138,-1000:10000:PASS:108411:151367:40665:2:560:0:323:0	0/0:0,-79.1013,-929.23:10000:PASS:89781:119793:32578:2:405:3:263:0	0/0:0,-106.726,-1000:10000:PASS:120414:164209:45228:2:628:0:355:0	0/0:0,-63.7721,-750.854:10000:PASS:68178:92324:25942:2:298:0:212:0	0/0:0,-108.277,-1000:10000:PASS:120208:167979:46430:2:639:1:360:0	0/0:0,-54.1516,-640.866:10000:PASS:48333:76256:22185:2:269:1:180:0	0/0:0,-88.3758,-1000:10000:PASS:97161:139098:37185:2:474:0:294:0	0/0:0,-190.746,-1000:10000:PASS:192742:265313:75502:2:959:1:634:0	0/0:0,-139.539,-1000:10000:PASS:129076:208398:61731:2:767:0:464:0	0/0:0,-133.521,-1000:10000:PASS:146832:204706:57047:2:735:0:444:0	0/0:0,-107.685,-1000:10000:PASS:122137:171156:46951:2:634:1:358:0	0/0:0,-126.261,-1000:10000:PASS:149525:203257:54894:2:715:0:421:0	0/0:0,-86.6352,-1000:10000:PASS:93330:133996:38167:2:525:2:288:0	0/0:0,-107.976,-1000:10000:PASS:129325:183905:49279:2:688:1:359:0	0/0:0,-101.676,-1000:10000:PASS:111208:152986:42441:2:552:0:338:0
Chr01	16990008	17134901	DEL00007908	144893	0.995763	0.00423729	0	0	PASS	PRECISE	DEL	60	-2,2	-2,2	CTGATGATCCCTCTCTCTCCTTAGGTCACCCAAGGTAGAAAAAATGCCCCAAACAAAGCCGAGAGTTCGATCCAAGTACTAACCCTCTAGTTGTGATTTCTAAAGATTGAATTTCAGTAGCCTGACCGTAAAAGGAACTAGTCAAAGCTCTCGGCTCATACTTTCCACTGTTTCTTTCCCACGGGTCATCTCTGTATAAGCTGGGAGTCAGTCGGTGGTTAAAG	0/0:0,-11.436,-144.197:114:PASS:15155:16376:9393:1:78:0:38:0	0/0:0,-142.489,-1000:10000:PASS:119160:138905:79359:1:815:0:475:0	0/0:0,-321.264,-1000:10000:PASS:267031:286982:167564:1:1735:5:1070:0	0/0:0,-83.6585,-955.971:10000:PASS:62282:71807:41073:1:432:1:279:0	0/0:0,-17.1517,-212.493:10000:PASS:25037:26505:15735:1:120:1:57:0	0/0:0,-81.8441,-975.064:10000:PASS:58153:70136:38108:1:315:4:272:0	0/0:0,-142.63,-1000:10000:PASS:104448:121586:66706:1:554:6:474:0	0/0:0,-201.932,-1000:10000:PASS:159149:178314:102856:1:936:3:672:0	0/0:0,-8.18961,-1000:82:PASS:155743:163620:109401:1:842:30:597:54	0/0:0,-9.68925,-320.592:97:PASS:35980:35866:25255:1:184:5:90:5	0/0:0,-300.801,-1000:10000:PASS:236331:266601:152826:1:1411:5:1001:0	0/0:0,-136.509,-1000:10000:PASS:102033:113542:66858:1:608:2:454:0	0/0:0,-244.932,-1000:10000:PASS:312807:349557:195741:1:1777:4:815:0	0/0:0,-19.5579,-244.691:10000:PASS:28363:29542:17166:1:145:1:65:0	0/0:0,-161.343,-1000:10000:PASS:124290:132808:78745:1:781:4:538:0	0/0:0,-96.759,-1000:10000:PASS:78281:84178:58616:1:506:3:322:0	0/0:0,-109.76,-1000:10000:PASS:81278:103808:62866:1:589:1:365:0	0/0:0,-108.857,-1000:10000:PASS:88723:100319:67474:1:623:2:362:0	0/0:0,-122.755,-1000:10000:PASS:103030:106656:67654:1:474:2:408:0	0/0:0,-102.288,-1000:10000:PASS:82194:91399:61985:1:590:2:340:0	0/0:0,-74.188,-878.834:10000:PASS:68371:75350:44845:1:363:2:247:0	0/0:0,-104.218,-1000:10000:PASS:90334:98301:68216:1:585:1:347:0	0/0:0,-56.8666,-680.672:10000:PASS:51358:57228:36136:1:272:2:189:0	0/0:0,-122.383,-1000:10000:PASS:90884:101205:69280:1:631:1:407:0	0/0:0,-48.1371,-575.172:10000:PASS:35116:48579:28974:2:235:1:160:0	0/0:0,-95.9553,-1000:10000:PASS:73266:83771:56925:1:499:3:319:0	0/0:0,-187.134,-1000:10000:PASS:146423:162378:107806:1:949:1:622:0	0/0:0,-152.81,-1000:10000:PASS:94421:133643:78379:2:796:4:508:0	0/0:0,-141.693,-1000:10000:PASS:111497:122035:85106:1:720:1:471:0	0/0:0,-113.105,-1000:10000:PASS:92226:103167:70451:1:644:3:376:0	0/0:0,-143.158,-1000:10000:PASS:113017:120675:84585:1:727:1:476:0	0/0:0,-27.8658,-986.45:10000:PASS:70526:80217:56190:1:473:10:293:19	0/0:0,-133.539,-1000:10000:PASS:98283:110038:75791:1:713:2:444:0	0/0:0,-104.999,-1000:10000:PASS:84584:92795:62032:1:519:5:349:0
Chr01	16994972	17006335	DUP00004774	11363	0.974576	0.0254237	0	0	PASS	PRECISE	DUP	60	-2,2	-2,2	TACTGCTGCTGCCGAAGACTCTCTCTTGTCAGAGAAGAGGGTGTGTAACTAAATCAATGACTCACCTTATATATCATAATGGGCTACCTCGTCTCAATAGGTTAAAATCAAGGTCTCCTCTGCCTCTGGGAATAAGTATAAATACAAGGCTACCTTTATCCATTTATTTTGGATGAAAATCCTCCTTCTCCTTCC	0/0:0,-12.3379,-152.796:123:PASS:831:3031:1230:3:101:0:41:0	0/0:0,-149.714,-1000:10000:PASS:6561:24203:10256:3:785:0:498:0	0/0:0,-312.229,-1000:10000:PASS:13923:51393:20654:3:1665:0:1039:0	0/0:0,-77.2371,-876.772:10000:PASS:3577:12766:5194:3:407:0:257:0	0/0:0,-17.1542,-216.695:10000:PASS:1259:4786:1938:3:155:0:57:0	0/0:0,-68.9099,-826.274:10000:PASS:3291:11922:4976:3:288:0:229:0	0/0:0,-130.588,-1000:10000:PASS:5747:21002:8988:3:513:0:434:0	0/0:0,-197.191,-1000:10000:PASS:8518:31426:13294:3:984:0:656:0	0/0:0,-168.812,-1000:10000:PASS:7785:28861:11768:3:816:0:562:0	0/0:0,-21.6648,-267.691:10000:PASS:1742:6552:2563:3:195:0:72:0	0/0:0,-274.5,-1000:10000:PASS:13019:48119:19009:3:1378:0:914:0	0/0:0,-126.283,-1000:10000:PASS:5601:20037:8283:3:612:0:420:0	0/0:0,-226.192,-1000:10000:PASS:16170:63231:24642:3:1834:0:752:0	0/0:0,-19.2604,-243.194:10000:PASS:1464:5412:2077:3:169:0:64:0	0/0:0,-144.748,-1000:10000:PASS:6783:24250:9373:3:755:0:482:0	0/0:0,-92.8066,-1000:10000:PASS:4314:14723:6993:3:497:0:309:0	0/0:0,-104.357,-1000:10000:PASS:5109:18232:7852:3:593:0:347:0	0/0:0,-105.592,-1000:10000:PASS:5229:18062:7873:3:615:0:351:0	0/0:0,-139.868,-1000:10000:PASS:4991:19581:7814:3:443:0:465:0	0/0:0,-81.1981,-1000:10000:PASS:4595:16788:7389:3:598:3:378:10	0/0:0,-85.102,-989.51:10000:PASS:3352:12701:6585:3:396:0:283:0	0/0:0,-101.273,-1000:10000:PASS:4965:17077:7674:3:594:0:338:0	0/0:0,-73.2687,-837.717:10000:PASS:2308:9900:4699:3:311:5:244:0	0/0:0,-107.032,-1000:10000:PASS:5227:17625:8007:3:591:0:356:0	0/0:0,-57.4607,-684.664:10000:PASS:2467:8470:3787:3:269:0:191:0	0/0:0,-89.0073,-1000:10000:PASS:4333:15082:6518:3:463:0:296:0	0/0:0,-175.201,-1000:10000:PASS:7956:28812:12508:3:906:2:583:0	0/0:0,-141.916,-1000:10000:PASS:6702:23694:10369:3:775:0:472:0	0/0:0,-126.257,-1000:10000:PASS:6132:20716:9622:3:700:0:420:0	0/0:0,-107.387,-1000:10000:PASS:5254:18115:8227:3:612:0:357:0	0/0:0,-135.35,-1000:10000:PASS:6342:21881:9797:3:718:0:450:0	0/0:0,-78.5149,-924.446:10000:PASS:4095:13708:6095:3:467:0:261:0	0/0:0,-119.027,-1000:10000:PASS:5695:19346:8812:3:681:0:396:0	0/0:0,-103.207,-1000:10000:PASS:4963:16258:7229:3:512:0:343:0
Chr01	16998315	17175703	INV00010918	177388	0.995763	0.00423729	0	0	PASS	PRECISE	INV	60	-2,2	-2,2	CCGGACAAGGCAACAACTGCTTTTCGTGCTGACCCAGAGGAGCATGCACGGGAGTCGACCGGACCAGAACCGCTTTCTTTCCGGCCGAAGTACCGCTTTAAGAATACAGTAGTGTCAAGGATTTGCTGGGAATTCCGGATCGTAGAAAGGGAAGATCTAAATATGGTGCAGAAAGACCAAAATCGAAATGAATGGAAGATGCCTCTGGAACTTTTTGGTTCTTTTGTTCG	0/0:0,-9.32906,-116.797:93:PASS:17294:20410:8107:2:83:3:31:0	0/0:0,-156.247,-1000:10000:PASS:138477:172472:73605:2:792:7:521:0	0/0:0,-316.339,-1000:10000:PASS:307809:358294:150966:2:1745:7:1053:0	0/0:0,-72.4824,-832.134:10000:PASS:72348:89385:37368:2:396:3:241:0	0/0:0,-14.1438,-176.395:141:PASS:28441:33453:13484:2:127:5:47:0	0/0:0,-71.9176,-858.671:10000:PASS:67875:86558:36350:2:277:5:239:0	0/0:0,-125.48,-1000:10000:PASS:121425:151003:61153:2:499:6:417:0	0/0:0,-196.806,-1000:10000:PASS:183913:221088:95369:2:963:2:655:0	0/0:0,-190.167,-1000:10000:PASS:185790:218854:83647:2:832:1:633:0	0/0:0,-23.1716,-290.592:10000:PASS:42579:49389:17588:2:196:1:77:0	0/0:0,-294.684,-1000:10000:PASS:274443:330226:141523:2:1398:8:981:0	0/0:0,-118.083,-1000:10000:PASS:117630:142129:59635:2:589:10:393:0	0/0:0,-226.335,-1000:10000:PASS:361291:431462:181022:2:1839:22:753:0	0/0:0,-15.047,-188.296:150:PASS:32351:37011:14717:2:153:0:50:0	0/0:0,-136.69,-1000:10000:PASS:143075:166826:69295:2:725:14:455:0	0/0:0,-88.1104,-1000:10000:PASS:94489:113745:43570:2:488:0:293:0	0/0:0,-114.61,-1000:10000:PASS:96976:132743:51421:2:598:1:381:0	0/0:0,-107.975,-1000:10000:PASS:107745:134904:50333:2:598:3:359:0	0/0:0,-116.129,-1000:10000:PASS:122158:141335:51503:2:519:11:386:0	0/0:0,-101.946,-1000:10000:PASS:99392:123068:45196:2:529:6:339:0	0/0:0,-83.576,-964.79:10000:PASS:82297:97981:34815:2:413:3:278:0	0/0:0,-108.285,-1000:10000:PASS:109453:133446:50377:2:596:0:361:0	0/0:0,-63.636,-746.218:10000:PASS:61561:75844:28526:2:304:6:212:0	0/0:0,-116.983,-1000:10000:PASS:110006:136370:51519:2:623:3:389:0	0/0:0,-45.0927,-527.438:10000:PASS:42490:61266:24520:2:263:1:150:0	0/0:0,-90.8234,-1000:10000:PASS:89123:113170:41417:2:487:9:302:0	0/0:0,-189.224,-1000:10000:PASS:176585:215868:84714:2:940:6:629:0	0/0:0,-143.761,-1000:10000:PASS:114741:168470:68031:2:766:2:478:0	0/0:0,-131.705,-1000:10000:PASS:134319:166612:63414:2:698:5:438:0	0/0:0,-123.038,-1000:10000:PASS:111707:139345:51856:2:666:0:409:0	0/0:0,-137.734,-1000:10000:PASS:136828:164580:60948:2:745:3:458:0	0/0:0,-97.4669,-1000:10000:PASS:85376:108897:42715:2:503:2:324:0	0/0:0,-130.536,-1000:10000:PASS:119289:149128:54545:2:683:5:434:0	0/0:0,-108.561,-1000:10000:PASS:102568:124099:46973:2:515:3:361:0
Chr01	17003434	17167315	DUP00004798	163881	0.991525	0.00847458	0	0	PASS	PRECISE	DUP	60	-3,3	-3,3	TTTTGGACACCTCTCCACAAAAAGAAGGGAAAGGATAAGAAAGGATAGCCCGAAGCTAGGCGCCCGTCGCACATTGCATTGATTTGGCCTATATATGAAACTAACTTTTTTGCAATTGGTGACCTTAGGGAAAATGCAATTTACTACTTTCCCATATATATAAA	0/0:0,-12.6391,-157.096:126:PASS:17088:17428:9444:1:98:0:42:0	0/0:0,-139.243,-1000:10000:PASS:134275:148813:85380:1:836:0:463:0	0/0:0,-317.548,-1000:10000:PASS:299622:308087:175677:1:1761:0:1056:0	0/0:0,-80.6176,-942.042:10000:PASS:70558:77191:43173:1:425:0:268:0	0/0:0,-20.1606,-251.692:10000:PASS:27908:28697:15731:1:174:0:67:0	0/0:0,-73.1135,-868.963:10000:PASS:65909:74942:42054:1:284:0:243:0	0/0:0,-132.915,-1000:10000:PASS:117988:130736:71117:1:524:0:442:0	0/0:0,-195.13,-1000:10000:PASS:178536:190518:110161:1:984:0:649:0	0/0:0,-195.131,-1000:10000:PASS:174799:190495:97762:1:925:0:649:0	0/0:0,-26.7844,-337.593:10000:PASS:40121:42831:20718:1:248:1:89:0	0/0:0,-285.917,-1000:10000:PASS:266857:283998:163982:1:1505:0:951:0	0/0:0,-124.587,-1000:10000:PASS:114466:122411:69148:1:680:0:415:0	0/0:0,-237.93,-1000:10000:PASS:351968:372105:209693:1:1974:0:791:0	0/0:0,-23.4734,-295.093:10000:PASS:31695:31685:17252:1:212:0:78:0	0/0:0,-152.51,-1000:10000:PASS:139701:143351:80431:1:823:1:507:0	0/0:0,-97.117,-1000:10000:PASS:88154:98972:51096:1:558:0:323:0	0/0:0,-58.6203,-676.819:10000:PASS:99589:115307:59870:1:322:0:195:0	0/0:0,-119.728,-1000:10000:PASS:101426:116794:59351:1:681:0:398:0	0/0:0,-102.909,-1000:10000:PASS:116010:122419:60608:1:526:1:342:0	0/0:0,-112.757,-1000:10000:PASS:94127:106482:53471:1:604:6:375:0	0/0:0,-77.2986,-914.334:10000:PASS:77008:85335:41522:1:424:1:257:0	0/0:0,-114.873,-1000:10000:PASS:101961:115591:59673:1:659:0:382:0	0/0:0,-60.6907,-715.283:10000:PASS:57809:66045:33500:1:343:0:202:0	0/0:0,-119.12,-1000:10000:PASS:103203:118215:60806:1:649:0:396:0	0/0:0,-27.6727,-331.778:10000:PASS:43785:53166:28304:1:132:0:92:0	0/0:0,-96.8036,-1000:10000:PASS:83652:98088:49106:1:555:0:322:0	0/0:0,-195.224,-1000:10000:PASS:165980:187452:98671:1:1063:0:649:0	0/0:0,-73.5949,-855.343:10000:PASS:118168:146007:78759:1:416:0:245:0	0/0:0,-138.865,-1000:10000:PASS:125351:144775:74821:1:764:0:462:0	0/0:0,-127.254,-1000:10000:PASS:104674:121011:61146:1:712:1:423:0	0/0:0,-147.958,-1000:10000:PASS:127734:142267:72440:1:804:0:492:0	0/0:0,-90.7867,-1000:10000:PASS:79968:94392:50404:1:553:0:302:0	0/0:0,-123.63,-1000:10000:PASS:111603:129489:64622:1:729:0:411:0	0/0:0,-11.6161,-1000:116:PASS:95749:107925:55156:1:535:5:324:26
Chr01	17006640	17220919	DEL00007940	214279	0.991525	0.00847458	0	0	PASS	PRECISE	DEL	60	-2,2	-2,2	GCGGAAGTGTATGCGTTACTGTACTGGGAAGCTAGCATTTTGTCTTGTCATGGAAGTTCGTGTTCGTGTTCGTGTTCGAATGTTCTTGTTTTTCGTTGGAAAAACCAACGCCTTCGGAAGAATCAACTGACTTCTCCCTTCTTCATTGATCCGGGGGAAAGGGAACCGTCTACCAGTTGGGAAGCTAGACATCAAGGTTGTGGCTTGATG	0/0:0,-8.7268,-106.797:87:PASS:20695:22822:1749:2:87:0:29:0	0/0:0,-160.121,-1000:10000:PASS:165991:199531:8506:2:845:9:533:0	0/0:0,-323.461,-1000:10000:PASS:365801:411169:8754:2:1684:15:1077:0	0/0:0,-81.7262,-910.246:10000:PASS:86672:102396:8402:2:397:10:272:0	0/0:0,-15.9467,-194.492:157:PASS:33891:37668:2285:2:133:1:53:0	0/0:0,-91.7786,-1000:10000:PASS:80933:99590:6766:2:342:8:305:0	0/0:0,-159.181,-1000:10000:PASS:144585:172216:6661:2:601:12:529:0	0/0:0,-217.374,-1000:10000:PASS:219437:255546:8428:2:942:11:723:0	0/0:0,-185.625,-1000:10000:PASS:218030:249100:9574:2:826:0:618:0	0/0:0,-24.3754,-301.392:10000:PASS:49941:54722:2055:2:195:0:81:0	0/0:0,-312.031,-1000:10000:PASS:328497:381094:10573:2:1505:14:1039:0	0/0:0,-124.116,-1000:10000:PASS:140613:163299:10023:2:581:15:414:0	0/0:0,-245.642,-1000:10000:PASS:430242:492463:18340:2:1876:19:818:0	0/0:0,-16.2505,-202.195:10000:PASS:38461:41459:1856:2:144:1:54:0	0/0:0,-144.458,-1000:10000:PASS:170674:189869:9107:2:741:10:481:0	0/0:0,-91.0368,-1000:10000:PASS:111048:130038:5630:2:471:0:303:0	0/0:0,-111.156,-1000:10000:PASS:117228:151020:5384:2:588:0:370:0	0/0:0,-113.065,-1000:10000:PASS:127767:152015:5092:2:621:1:376:0	0/0:0,-123.603,-1000:10000:PASS:143397:156819:7467:2:476:0:411:0	0/0:0,-15.5449,-1000:157:PASS:117782:138520:5564:2:549:9:320:25	0/0:0,-93.8288,-1000:10000:PASS:96596:109203:5417:2:452:0:312:0	0/0:0,-104.328,-1000:10000:PASS:128901:151727:6630:2:616:1:348:0	0/1:-5.25571,0,-707.048:53:PASS:72818:85735:4187:2:339:10:226:23	0/0:0,-119.405,-1000:10000:PASS:129906:155163:4872:2:630:0:397:0	0/0:0,-54.3564,-635.47:10000:PASS:52067:69934:5272:2:267:5:181:0	0/0:0,-93.2011,-1000:10000:PASS:105651:127223:4456:2:502:0:310:0	0/0:0,-205.622,-1000:10000:PASS:208526:246175:13231:2:988:1:684:0	0/0:0,-156.172,-1000:10000:PASS:141053:191991:5273:3:824:0:520:0	0/0:0,-140.712,-1000:10000:PASS:157792:189575:5400:2:721:2:469:0	0/0:0,-114.859,-1000:10000:PASS:131989:158198:5911:2:677:1:382:0	0/0:0,-134.767,-1000:10000:PASS:161286:185778:4464:2:683:0:449:0	0/0:0,-91.9927,-1000:10000:PASS:100804:125272:5038:2:497:10:306:0	0/0:0,-119.926,-1000:10000:PASS:140684:168769:5756:2:680:0:399:0	0/0:0,-104.983,-1000:10000:PASS:120474:140880:5046:2:550:5:349:0
Chr01	17010970	17159888	INV00010968	148918	0.978814	0.0211864	0	0	PASS	PRECISE	INV	60	-3,3	-3,3	CGCCAAAATTCACTGGCAGACCGAGTCGGGCGCAGGTGCCGGATCCTCAAAGTAAAGTATCGATCAGCCTAGTGTACCAACCACGTGGTACGACGGGCACTCAAAGACCTGGCGAACCTCTCTTGCCGAGTCTTCTCCTCATAGCAAGTTCCGGGAGAGCTAAACTACTAATATAATGTAAATAGCAGACGCTAGAACAAGAACGGATTGCTTTACCCGCTATA	0/0:0,-3.30995,-40.2986:33:PASS:14934:15046:9436:1:39:0:11:0	0/0:0,-68.4617,-772.727:10000:PASS:116900:128914:84717:1:399:4:228:0	0/0:0,-124.986,-1000:10000:PASS:262938:266731:174417:1:743:6:416:0	0/0:0,-32.8804,-363.667:10000:PASS:61582:66864:43095:1:206:8:110:0	0/0:0,-5.718,-71.8984:57:PASS:24561:24713:15832:1:48:0:19:0	0/0:0,-35.5054,-418.584:10000:PASS:57551:65134:41964:1:145:0:118:0	0/0:0,-63.1874,-747.971:10000:PASS:103072:113101:70824:1:271:0:210:0	0/0:0,-90.0539,-1000:10000:PASS:155573:164499:109834:1:466:1:301:0	0/0:0,-168.609,-1000:10000:PASS:155910:152929:111793:1:828:3:561:0	0/0:0,-19.259,-236.793:10000:PASS:36015:33448:24890:1:160:0:64:0	0/0:0,-127.463,-1000:10000:PASS:233066:245298:163258:1:667:0:424:0	0/0:0,-48.9578,-550.59:10000:PASS:100139:105627:69443:1:268:0:163:0	0/0:0,-91.9002,-1000:10000:PASS:309805:323978:206507:1:834:1:306:0	0/0:0,-7.22253,-89.7978:72:PASS:28108:27403:17256:1:59:0:24:0	0/0:0,-51.0857,-572.61:10000:PASS:123548:123692:80498:1:291:0:171:0	0/0:0,-80.9907,-926.713:10000:PASS:79265:79075:57797:1:485:0:270:0	0/0:0,-106.746,-1000:10000:PASS:96307:93272:66494:1:614:1:355:0	0/0:0,-98.0375,-1000:10000:PASS:91574:93676:67123:1:584:3:326:0	0/0:0,-98.0724,-1000:10000:PASS:106835:98832:68341:1:390:12:326:0	0/0:0,-45.7599,-1000:10000:PASS:85855:85179:60313:1:534:11:313:15	0/0:0,-79.7158,-934.543:10000:PASS:71740:69408:45493:1:419:12:265:0	0/0:0,-87.0962,-974.698:10000:PASS:91100:92645:67805:1:586:0:290:0	0/0:0,-59.8249,-705.22:10000:PASS:53103:53639:37069:1:315:6:199:0	0/0:0,-107.972,-1000:10000:PASS:92274:95000:68930:1:595:0:359:0	0/0:0,-47.837,-565.373:10000:PASS:43081:43489:30757:1:242:5:159:0	0/0:0,-75.5359,-866.176:10000:PASS:75664:78759:55662:1:421:2:252:0	0/0:0,-158.542,-1000:10000:PASS:150313:150912:110856:1:904:17:527:0	0/0:0,-121.191,-1000:10000:PASS:116274:119309:85158:1:716:5:403:0	0/0:0,-119.702,-1000:10000:PASS:112799:116368:84714:1:707:5:398:0	0/0:0,-107.398,-1000:10000:PASS:94030:97219:69331:1:648:3:357:0	0/0:0,-128.194,-1000:10000:PASS:115513:113471:82255:1:713:9:427:0	0/0:0,-79.3504,-922.178:10000:PASS:71690:75932:56878:1:483:3:264:0	0/0:0,-104.046,-1000:10000:PASS:100297:103831:73522:1:663:2:346:0	0/0:0,-92.9589,-1000:10000:PASS:85632:86790:62327:1:512:1:309:0
Chr01	17014300	17148168	INV00010990	133868	0.987288	0.0127119	0	0	PASS	PRECISE	INV	45	-6,6	-6,6	TCGGCATATGGAACCTCTCAACTGCTCCCTCGGGATAGGTAGGCCCATCCCCCACCCCCCTTTCCCGAGAGGCGGCCGGGCTGTGTTTCCCCAGCGGCCACCCAGTGGCGGCAGGCGTGTAGCTGGGTGAAAAGGTTTGGCTGTTAGGAAAGTAAGTTCAAGCAGAAAGAATGGAAAGAAAAACAATTGGTTTAGAATAAGGCTGCAAGTACTGAGTTGGATTTC	0/0:0,-9.92698,-117.793:99:PASS:13404:14162:6335:1:73:0:33:0	0/0:0,-134.949,-1000:10000:PASS:105358:119853:55159:1:717:1:451:0	0/0:0,-269.309,-1000:10000:PASS:235320:248330:116182:1:1398:1:900:0	0/0:0,-62.8359,-701.321:10000:PASS:54977:62113:28069:1:345:2:209:0	0/0:0,-13.2375,-157.692:132:PASS:21985:23284:10608:1:110:0:44:0	0/0:0,-76.43,-907.468:10000:PASS:51936:60745:26145:2:330:0:254:0	0/0:0,-142.026,-1000:10000:PASS:93142:105392:45069:2:605:0:472:0	0/0:0,-162.95,-1000:10000:PASS:139862:153260:71899:1:752:2:543:0	0/0:0,-132.926,-1000:10000:PASS:139383:138480:83731:1:649:3:445:0	0/0:0,-15.3458,-187.693:154:PASS:32254:30647:19156:1:132:2:51:0	0/0:0,-259.641,-1000:10000:PASS:209694:228338:106742:1:1274:2:866:0	0/0:0,-96.859,-1000:10000:PASS:89035:98728:46306:1:497:1:323:0	0/0:0,-204.465,-1000:10000:PASS:278012:302808:132491:1:1658:4:681:0	0/0:0,-12.3357,-147.694:123:PASS:25009:25918:11535:1:111:0:41:0	0/0:0,-116.452,-1000:10000:PASS:109297:115902:53857:1:612:1:390:0	0/0:0,-80.7713,-903.094:10000:PASS:71349:71357:44336:1:412:1:269:0	0/0:0,-101.587,-1000:10000:PASS:86746:83662:50224:1:571:0:338:0	0/0:0,-105.749,-1000:10000:PASS:83231:84152:50887:1:570:1:352:0	0/0:0,-119.836,-1000:10000:PASS:95698:89563:50728:1:523:13:399:0	0/0:0,-83.8421,-967.455:10000:PASS:78127:76358:46729:1:532:5:279:0	0/0:0,-65.3138,-734.989:10000:PASS:66041:62235:33508:1:330:0:218:0	0/0:0,-93.1783,-1000:10000:PASS:82363:83449:51944:1:520:0:310:0	0/0:0,-52.7997,-593.418:10000:PASS:48364:48137:27056:1:266:5:176:0	0/0:0,-96.8456,-1000:10000:PASS:83571:85377:52589:1:570:2:322:0	0/0:0,-40.3107,-471.473:10000:PASS:39057:39228:22838:1:218:0:134:0	0/0:0,-83.8566,-954.869:10000:PASS:68737:70884:42539:1:459:1:279:0	0/0:0,-175.989,-1000:10000:PASS:136723:135774:82096:1:871:2:586:0	0/0:0,-131.721,-1000:10000:PASS:106385:107383:61799:1:734:2:438:0	0/0:0,-122.913,-1000:10000:PASS:102285:104659:64154:1:648:2:410:0	0/0:0,-107.324,-1000:10000:PASS:85201:87349:53060:1:618:2:357:0	0/0:0,-113.572,-1000:10000:PASS:104566:101909:63540:1:634:3:378:0	0/0:0,-76.9954,-892.732:10000:PASS:65029:68297:43137:1:445:1:256:0	0/0:0,-103.753,-1000:10000:PASS:91053:93621:56710:1:626:3:345:0	0/0:0,-99.5724,-1000:10000:PASS:77638:78177:46641:1:472:2:331:0
Chr01	17017003	17144646	DEL00007969	127643	0.995763	0.00423729	0	0	PASS	PRECISE	DEL	60	-7,7	-7,7	TATCAATCGATTTGAAAGGTTCATCTCGCTTTTCGTTCATTTCAGCCACGCCATAATATAATAGCCGCCACAATAAGAAAGAAGCAAGCGAAACAGCTAAAAGCGCTCGCTTCGTCCATAATAGAACCCCCCACCCTCACCTTTCTTAGGACTATCAAGCCTTCTCGAATTAGGTCTATGGGTACGAAGGCCTCTCGAATTTGTTCTACGGTAGAAGCTTTGAAC	0/0:0,-8.42511,-101.196:84:PASS:12504:12836:7306:1:68:0:28:0	0/0:0,-121.127,-1000:10000:PASS:100790:108929:61500:1:711:0:403:0	0/0:0,-255.146,-1000:10000:PASS:222762:225895:129864:1:1412:2:849:0	0/0:0,-63.8834,-705.264:10000:PASS:52342:56348:31644:1:370:0:213:0	0/0:0,-12.2971,-142.655:123:PASS:20465:21087:12241:1:140:1:41:0	0/0:0,-75.828,-899.568:10000:PASS:49579:55303:29203:1:322:6:252:0	0/0:0,-142.025,-1000:10000:PASS:89026:95568:50729:1:631:10:472:0	0/0:0,-168.08,-1000:10000:PASS:132906:139418:80248:1:845:2:559:0	0/0:0,-59.9035,-1000:10000:PASS:129137:126518:90471:1:726:38:470:26	0/0:0,-11.542,-171.991:115:PASS:29409:27974:21003:1:129:7:49:1	0/0:0,-240.716,-1000:10000:PASS:199779:207850:118559:1:1270:1:802:0	0/0:0,-100.787,-1000:10000:PASS:84132:89876:51966:1:522:3:336:0	0/0:0,-195.087,-1000:10000:PASS:263715:274944:150987:1:1664:1:650:0	0/0:0,-15.3452,-186.293:154:PASS:23117:23491:13313:1:151:0:51:0	0/0:0,-115.764,-1000:10000:PASS:102738:105598:60643:1:611:1:385:0	0/0:0,-77.3579,-882.292:10000:PASS:66083:64856:48200:1:465:28:258:0	0/0:0,-102.252,-1000:10000:PASS:80524:76039:54584:1:599:0:340:0	0/0:0,-96.1772,-1000:10000:PASS:77193:76582:55371:1:576:8:320:0	0/0:0,-89.9561,-1000:10000:PASS:87246:81911:55548:1:410:1:299:0	0/0:0,-88.9823,-1000:10000:PASS:72342:69341:50908:1:546:0:296:0	0/0:0,-83.898,-958.811:10000:PASS:60801:56828:36568:1:421:7:279:0	0/0:0,-95.8994,-1000:10000:PASS:76329:76006:56342:1:577:0:320:0	0/0:0,-59.1462,-676.943:10000:PASS:44434:43836:29360:1:295:6:197:0	0/0:0,-101.992,-1000:10000:PASS:77753:77816:57014:1:556:4:339:0	0/0:0,-44.8053,-524.852:10000:PASS:36292:35657:24995:1:258:1:149:0	0/0:0,-88.8806,-1000:10000:PASS:64036:64408:46471:1:490:0:296:0	0/0:0,-156.135,-1000:10000:PASS:126770:123701:89079:1:890:4:519:0	0/0:0,-123.942,-1000:10000:PASS:98658:97418:67554:1:796:5:412:0	0/0:0,-117.308,-1000:10000:PASS:94408:95388:69712:1:705:4:390:0	0/0:0,-105.254,-1000:10000:PASS:79560:79360:57684:1:627:3:350:0	0/0:0,-122.915,-1000:10000:PASS:96503:92613:69126:1:670:1:409:0	0/0:0,-9.20476,-788.738:92:PASS:60427:62335:46527:1:468:30:244:20	0/0:0,-113.469,-1000:10000:PASS:84863:85158:61711:1:677:3:378:0	0/0:0,-91.9873,-1000:10000:PASS:72468:71102:50798:1:507:2:306:0
Chr01	17043264	17061921	DUP00004843	18657	0.995763	0.00423729	0	0	PASS	PRECISE	DUP	60	-2,2	-2,2	AGAAGAAGAGTACGCGCGCTAGCGCGCCCCAAGACGTCAGTCCTTTTTCTGCTTGCTGGCCAAGCATTGCAATGAAAGAAAAAAACTTTCCTGTTTGTGTTATAGCTAGGACTTGGATGTTCCGGAATCCTCTTGCCGAGCTGGAACGACCCATCTCCTATTTCTGCTTCCAACG	0/0:0,-10.2309,-125.796:102:PASS:446:4091:1443:4:65:0:34:0	0/0:0,-143.562,-1000:10000:PASS:4915:32338:14684:3:756:0:478:0	0/0:0,-294.825,-1000:10000:PASS:9519:66863:29413:3:1503:0:982:0	0/0:0,-80.0504,-928.475:10000:PASS:2387:16478:7608:3:365:0:267:0	0/0:0,-15.9504,-201.996:10000:PASS:778:6562:2347:4:117:0:53:0	0/0:0,-78.8386,-943.569:10000:PASS:2410:16487:7966:3:300:0:262:0	0/0:0,-127.587,-1000:10000:PASS:4198:28494:13311:3:516:0:424:0	0/0:0,-192.18,-1000:10000:PASS:6049:41987:18347:3:850:0:639:0	0/0:0,-182.21,-1000:10000:PASS:5801:39444:16964:3:762:0:606:0	0/0:0,-24.0748,-302.592:10000:PASS:1105:9368:3209:4:141:0:80:0	0/0:0,-281.081,-1000:10000:PASS:9134:62166:27741:3:1293:0:936:0	0/0:0,-115.197,-1000:10000:PASS:3815:26868:11113:4:495:0:383:0	0/0:0,-237.302,-1000:10000:PASS:11771:81869:36527:3:1731:1:789:0	0/0:0,-19.5592,-242.992:10000:PASS:853:7368:2658:4:135:0:65:0	0/0:0,-132.316,-1000:10000:PASS:4300:31432:13021:4:611:0:440:0	0/0:0,-81.473,-937.294:10000:PASS:2876:20882:8238:4:460:0:271:0	0/0:0,-107.1,-1000:10000:PASS:3531:25729:10768:4:558:0:356:0	0/0:0,-101.39,-1000:10000:PASS:3191:24194:9895:4:594:0:337:0	0/0:0,-115.833,-1000:10000:PASS:3518:26273:10933:4:445:0:385:0	0/0:0,-101.032,-1000:10000:PASS:3155:22201:8983:4:548:0:336:0	0/0:0,-90.5234,-1000:10000:PASS:2782:18717:7898:4:440:0:301:0	0/0:0,-97.5965,-1000:10000:PASS:3360:24515:9897:4:553:0:325:0	0/0:0,-63.4809,-755.164:10000:PASS:1944:14057:6187:3:300:0:211:0	0/0:0,-106.095,-1000:10000:PASS:3480:24591:10326:4:572:0:353:0	0/0:0,-49.0424,-587.074:10000:PASS:1570:12140:4828:4:262:0:163:0	0/0:0,-88.1109,-1000:10000:PASS:2831:20444:8213:4:461:0:293:0	0/0:0,-174.415,-1000:10000:PASS:5269:38451:17223:3:875:0:580:0	0/0:0,-140.201,-1000:10000:PASS:4367:32105:13808:4:739:0:466:0	0/0:0,-135.387,-1000:10000:PASS:4130:29904:12680:4:678:0:450:0	0/0:0,-107.947,-1000:10000:PASS:3362:25317:10229:4:631:0:359:0	0/0:0,-121.17,-1000:10000:PASS:4238:29561:11561:4:659:0:403:0	0/0:0,-84.2296,-998.041:10000:PASS:2710:19602:8620:3:452:0:280:0	0/0:0,-113.719,-1000:10000:PASS:3749:26795:10687:4:655:0:378:0	0/0:0,-95.652,-1000:10000:PASS:3280:22611:9399:4:485:0:318:0
Chr01	17046911	17139386	INV00011045	92475	0.966102	0.0338983	0	0	PASS	PRECISE	INV	60	-6,6	-6,6	TCCGAAGGGAAACAAAAAGGGAAAGTCCCGCTTGTCAACCATGCCTGAGCCCAAAGGAAAAGCAGTACCAATCCGCTTCAAAGCTTCAGTCCTAGCTAGCCTATCTTCGACGTCAGAAATGTTTCGGTTGCTCGACCAAAGCCTGTCAATAAGACAGATCCGGATCCTAGCG	0/0:0,-5.41702,-67.8985:54:PASS:5205:9658:7132:2:46:0:18:0	0/0:0,-100.235,-1000:10000:PASS:47997:80291:59034:2:401:2:334:0	0/0:0,-217.029,-1000:10000:PASS:95748:168069:124971:2:871:3:723:0	0/0:0,-54.3756,-615.589:10000:PASS:24175:41788:30851:2:196:1:181:0	0/0:0,-10.2164,-122.081:102:PASS:8599:15769:11991:2:72:0:34:0	0/0:0,-60.4824,-722.075:10000:PASS:23841:40980:29106:2:143:1:201:0	0/0:0,-118.132,-1000:10000:PASS:42304:70313:50648:2:304:0:393:0	0/0:0,-134.574,-1000:10000:PASS:60816:103259:76847:2:489:3:448:0	0/0:0,-139.387,-1000:10000:PASS:55574:94384:86529:1:817:0:464:0	0/0:0,-12.9259,-158.382:129:PASS:11570:21162:20362:1:181:1:43:0	0/0:0,-208.491,-1000:10000:PASS:91091:153841:114394:1:731:0:694:0	0/0:0,-91.6937,-1000:10000:PASS:37825:66602:50294:2:330:4:305:0	0/0:0,-135.678,-1000:10000:PASS:116261:204762:147760:2:962:7:452:0	0/0:0,-8.42154,-102.793:84:PASS:9240:17713:13095:2:79:0:28:0	0/0:0,-97.3329,-1000:10000:PASS:43056:78661:59090:2:384:3:324:0	0/0:0,-70.6022,-798.06:10000:PASS:29617:47565:45945:1:540:3:235:0	0/0:0,-95.7658,-1000:10000:PASS:36023:59183:48259:1:517:0:319:0	0/0:0,-94.8271,-1000:10000:PASS:35326:56483:53457:1:652:0:316:0	0/0:0,-130.99,-1000:10000:PASS:36067:61628:54302:1:577:18:436:0	0/0:0,-88.569,-1000:10000:PASS:32986:50733:48794:1:588:2:295:0	0/0:0,-74.8427,-877.286:10000:PASS:27646:41721:35191:1:428:8:249:0	0/0:0,-89.1951,-1000:10000:PASS:34235:56019:53905:1:655:3:297:0	0/0:0,-57.7097,-694.312:10000:PASS:20979:32421:28349:1:329:2:192:0	0/0:0,-91.1155,-1000:10000:PASS:35533:57136:54635:1:600:1:303:0	0/0:0,-42.3663,-504.421:10000:PASS:16522:28008:22045:1:234:0:141:0	0/0:0,-72.944,-836.294:10000:PASS:29399:47181:45085:1:516:0:243:0	0/1:-14.7411,0,-1000:147:PASS:56754:92403:84447:1:886:46:498:58	0/0:0,-122.858,-1000:10000:PASS:46752:75809:59728:1:664:2:409:0	0/0:0,-116.97,-1000:10000:PASS:42471:70326:67430:1:766:1:389:0	0/0:0,-90.5274,-1000:10000:PASS:36261:58341:55358:1:648:3:301:0	0/0:0,-122.305,-1000:10000:PASS:43078:67489:67229:1:793:5:407:0	0/0:0,-71.2234,-840.179:10000:PASS:27440:46319:44284:1:488:0:237:0	0/0:0,-106.92,-1000:10000:PASS:38900:62440:59368:1:732:2:356:0	0/0:0,-83.2126,-986.727:10000:PASS:32756:52060:49001:1:523:3:277:0
Chr01	17057328	17134895	DUP00004876	77567	0.995763	0.00423729	0	0	PASS	PRECISE	DUP	60	-4,4	-4,4	CCTTATCGCTATCCAGGGCCGTTGATAGGATTCGATTCTCAAAGTCAACCTCCAAGGAAGCAAAAACCTTTCCCCGGGGCCTAGGATCGGCTCATCAGGAACTTGAGCAATTCAAGAAACCTTAGAAGAAACTGGATATGTTGCAACAATAAGGGCTTAGCAAGAATCTTGAAACTGGTATGATACCGGCACATATAAGCCTGATGT	0/0:0,-9.3282,-115.996:93:PASS:4243:6277:5248:1:80:0:31:0	0/0:0,-133.524,-1000:10000:PASS:36868:51323:42433:1:865:1:445:0	0/0:0,-297.278,-1000:10000:PASS:74682:108170:90752:1:1783:0:990:0	0/0:0,-75.4811,-871.223:10000:PASS:18462:27018:22550:1:456:0:251:0	0/0:0,-14.7448,-183.094:147:PASS:6964:10224:8759:1:141:0:49:0	0/0:0,-86.0602,-1000:10000:PASS:18699:26199:20897:1:334:0:286:0	0/0:0,-141.125,-1000:10000:PASS:32519:44253:37333:1:578:0:469:0	0/0:0,-190.415,-1000:10000:PASS:46920:66231:54618:1:1015:0:634:0	0/0:0,-177.996,-1000:10000:PASS:44313:60127:65916:1:959:0:592:0	0/0:0,-20.4639,-254.694:10000:PASS:9796:13415:16057:1:188:0:68:0	0/0:0,-279.452,-1000:10000:PASS:70352:97892:81725:1:1488:0:930:0	0/0:0,-132.303,-1000:10000:PASS:29679:43303:36592:1:697:1:440:0	0/0:0,-228.731,-1000:10000:PASS:91377:132334:105530:1:2019:3:761:0	0/0:0,-18.3559,-229.493:10000:PASS:7716:11552:9618:1:176:0:61:0	0/0:0,-152.853,-1000:10000:PASS:34294:51039:43708:1:851:0:510:0	0/0:0,-89.5419,-1000:10000:PASS:23128:29614:35624:1:553:0:298:0	0/0:0,-106.626,-1000:10000:PASS:28478:37153:36060:1:652:0:355:0	0/0:0,-99.8596,-1000:10000:PASS:26789:35672:41488:1:620:0:332:0	0/0:0,-124.255,-1000:10000:PASS:28367:39564:41499:1:572:0:413:0	0/0:0,-102.889,-1000:10000:PASS:24894:31511:37932:1:614:0:342:0	0/0:0,-75.2052,-884.648:10000:PASS:20407:26635:27154:1:410:0:250:0	0/0:0,-96.3925,-1000:10000:PASS:27045:35180:41665:1:649:0:321:0	0/0:0,-58.9617,-696.56:10000:PASS:15535:20312:21547:1:317:0:196:0	0/0:0,-113.083,-1000:10000:PASS:27533:35946:42095:1:637:0:376:0	0/0:0,-50.2393,-598.767:10000:PASS:13119:17661:16141:1:267:0:167:0	0/0:0,-87.4453,-1000:10000:PASS:22655:29523:35296:1:533:1:291:0	0/0:0,-174.308,-1000:10000:PASS:42136:59643:63956:1:1008:0:580:0	0/0:0,-142.001,-1000:10000:PASS:35571:48156:43851:1:835:0:472:0	0/0:0,-134.782,-1000:10000:PASS:33022:44493:52283:1:818:1:448:0	0/0:0,-103.778,-1000:10000:PASS:27975:36484:43187:1:664:0:345:0	0/0:0,-134.712,-1000:10000:PASS:33144:41674:52378:1:791:0:448:0	0/0:0,-83.8637,-996.376:10000:PASS:21570:29515:33813:1:510:0:279:0	0/0:0,-131.47,-1000:10000:PASS:29940:38817:46801:1:768:0:437:0	0/0:0,-105.603,-1000:10000:PASS:25292:32686:37994:1:560:0:351:0
Chr01	17062470	17142553	DEL00008014	80083	0.970339	0.029661	0	0	PASS	PRECISE	DEL	60	-2,2	-2,2	TGGTTTCTGATCGAGATTCCTAATCAATAGGGCGAAGAGCTCTTCGCATGATCTGGTCCTACCTTTTTTTTTCTACGCTATTTTTTTGCCCCTTCTCAGCTGCTGTCCAATGATTTCACCGTGGTGTGCATTGGTAGCTTCAAGACGAAGGCATTTTCCATATAGAAAAGGAACTAATACACATCTCCTTTAGAAAAGAATTTCCCATAATGACTATGAATGCT	0/0:0,-12.3377,-152.796:123:PASS:4653:6835:5739:1:102:0:41:0	0/0:0,-131.976,-1000:10000:PASS:38270:58786:46565:1:781:7:439:0	0/0:0,-301.906,-1000:10000:PASS:78485:123932:98985:1:1669:10:1005:0	0/0:0,-78.4765,-896.408:10000:PASS:19440:30702:24566:1:432:3:261:0	0/0:0,-22.4003,-272.023:10000:PASS:7530:11281:9688:1:174:4:75:0	0/0:0,-78.8379,-938.568:10000:PASS:19433:29882:22977:1:303:19:262:0	0/0:0,-139.014,-1000:10000:PASS:33572:51186:40047:1:521:12:462:0	0/0:0,-198.609,-1000:10000:PASS:49401:75020:60461:1:973:5:661:0	0/0:0,-161.354,-1000:10000:PASS:46466:67381:72202:1:741:3:537:0	0/0:0,-24.9771,-309.592:10000:PASS:10709:14554:17323:1:213:0:83:0	0/0:0,-258.02,-1000:10000:PASS:73271:112343:90198:1:1310:10:858:0	0/0:0,-121.235,-1000:10000:PASS:31512:48833:39840:1:616:10:403:0	0/0:0,-229.107,-1000:10000:PASS:96390:149542:116448:1:1760:10:762:0	0/0:0,-24.3681,-294.685:10000:PASS:8458:12612:10570:1:224:0:81:0	0/0:0,-149.877,-1000:10000:PASS:36711:57986:46800:1:779:3:499:0	0/0:0,-88.0945,-989.593:10000:PASS:24432:33225:38655:1:486:0:293:0	0/0:0,-48.5754,-537.509:10000:PASS:30064:37995:43270:1:285:1:162:0	0/0:0,-99.2445,-1000:10000:PASS:28116:40098:44999:1:591:1:330:0	0/0:0,-112.729,-1000:10000:PASS:30548:43200:45558:1:512:6:375:0	0/0:0,-88.6572,-1000:10000:PASS:26020:35659:41228:1:515:2:295:0	0/0:0,-76.984,-887.52:10000:PASS:22156:28796:29781:1:392:1:256:0	0/0:0,-91.889,-1000:10000:PASS:28606:39182:45589:1:590:0:306:0	0/1:-39.2087,0,-630.698:10000:PASS:16463:22769:23724:1:312:14:199:31	0/0:0,-106.571,-1000:10000:PASS:28868:40377:45913:1:569:0:355:0	0/0:0,-28.1063,-315.209:10000:PASS:14134:17900:19465:1:135:1:94:0	0/0:0,-85.9982,-982.404:10000:PASS:23967:33243:37947:1:452:1:286:0	0/0:0,-165.132,-1000:10000:PASS:45034:65585:70795:1:902:0:549:0	0/0:0,-68.0496,-743.116:10000:PASS:37553:49201:53049:1:399:2:227:0	0/0:0,-125.41,-1000:10000:PASS:34968:50039:56640:1:718:3:417:0	0/0:0,-107.922,-1000:10000:PASS:29479:41078:46627:1:616:1:359:0	0/0:0,-121.429,-1000:10000:PASS:34680:47680:56556:1:676:0:405:0	0/0:0,-84.0413,-975.453:10000:PASS:22906:32802:37164:1:496:1:280:0	0/0:0,-112.713,-1000:10000:PASS:31364:44318:50105:1:665:0:375:0	0/0:0,-100.152,-1000:10000:PASS:26572:36597:41277:1:523:5:333:0
Chr01	17064982	17266251	DUP00004884	201269	0.885593	0.114407	0	0	PASS	PRECISE	DUP	60	-2,2	-2,2	TTTTTTAATAGACTGTAACATAGATAATTTGCCCAGAATTCATGTCCTCCATTAGTGCGAAAAAGAATGAATCCCTTGAGTCCGGCCCCCCTGGGTATCGACACGCGGCTGCCTCCTCTTGGTTGGTGCCGGGCCCGAGAGTGATGGGACTACTTCCTGAAAGAGCCTTTCGTTCGGGCCGGC	0/0:0,-5.41573,-63.7972:54:PASS:15580:19091:1622:2:62:0:18:0	0/0:0,-151.877,-1000:10000:PASS:129226:164744:7650:2:795:0:507:0	0/0:0,-293.718,-1000:10000:PASS:273786:344949:7964:2:1551:0:979:0	0/0:0,-73.6912,-815.538:10000:PASS:66356:85396:7587:2:376:0:246:0	0/0:0,-14.1406,-168.992:141:PASS:25177:31758:2101:2:91:0:47:0	0/0:0,-79.7409,-951.968:10000:PASS:64879:81915:5997:2:309:0:265:0	0/0:0,-139.619,-1000:10000:PASS:114141:140569:5913:2:528:0:464:0	0/0:0,-174.12,-1000:10000:PASS:167221:212399:7648:2:826:0:581:0	0/0:0,-190.014,-1000:10000:PASS:158985:206805:8779:2:861:0:634:0	0/0:0,-16.8483,-200.391:10000:PASS:35745:45943:1894:2:149:0:56:0	0/0:0,-286.461,-1000:10000:PASS:250954:316822:9495:2:1380:0:955:0	0/0:0,-105.482,-1000:10000:PASS:105853:136568:9103:2:525:0:352:0	0/0:0,-206.861,-1000:10000:PASS:327505:411917:16526:2:1754:1:689:0	0/0:0,-15.3457,-186.393:154:PASS:28140:35054:1716:2:129:0:51:0	0/0:0,-116.654,-1000:10000:PASS:126200:160705:8263:2:607:0:389:0	0/0:0,-79.966,-891.492:10000:PASS:83117:106989:5192:2:447:0:266:0	0/0:0,-110.348,-1000:10000:PASS:101706:122302:4943:2:607:0:367:0	0/0:0,-28.1726,-1000:10000:PASS:96827:125462:4690:2:563:4:346:24	0/0:0,-36.6205,-1000:10000:PASS:105517:129629:6891:2:509:12:345:22	0/0:0,-49.2212,-1000:10000:PASS:90058:113038:5051:2:513:7:309:15	0/1:-13.9786,0,-913.775:140:PASS:75173:86577:5060:2:432:8:292:33	0/0:0,-98.4392,-1000:10000:PASS:96599:124988:6097:2:573:0:329:0	0/0:0,-61.5985,-697.787:10000:PASS:55458:69282:3850:2:326:0:205:0	0/0:0,-106.165,-1000:10000:PASS:98398:127485:4450:2:553:0:353:0	0/0:0,-51.5914,-591.714:10000:PASS:46575:56987:4880:2:240:0:172:0	0/0:0,-75.9902,-845.63:10000:PASS:81661:104200:4073:2:412:0:253:0	0/0:0,-21.3184,-1000:10000:PASS:156690:203798:12203:2:901:14:573:47	0/0:0,-109.012,-1000:10000:PASS:126569:156950:4870:2:761:5:466:10	0/0:0,-81.9909,-1000:10000:PASS:118382:157327:4961:3:661:4:422:14	0/0:0,-103.667,-1000:10000:PASS:100322:129451:5369:2:581:0:345:0	0/0:0,-73.1163,-1000:10000:PASS:119626:152752:4126:2:618:2:391:14	0/0:0,-16.1379,-903.833:10000:PASS:77204:103924:4666:3:478:5:281:22	0/0:0,-110.558,-1000:10000:PASS:107535:138057:5242:2:646:0:368:0	0/0:0,-94.0608,-1000:10000:PASS:90991:115655:4642:2:483:0:313:0
Chr01	17065609	17161910	INV00011119	96301	0.991525	0.00847458	0	0	PASS	PRECISE	INV	60	-2,2	-2,2	TTGCGTTGGATGCTCTTTACCCTCCCCACTATGAGGGCTCTGTTGTCTTGGGGAGCGTTGAAGCTTGCTTCTTTTCCATACTTTTCTTGGTCATCAATACGACAGAGGAAAGGGGTATAGATAGAAGGAGGGATCCTCCGACCATAGGTCTATTGAATAGAAAAAAACAATTGAATATCCAGCAGCTGCTTTTATTTTCTCTACGAAGATAGTGGCT	0/0:0,-3.30988,-40.9986:33:PASS:5870:8366:5886:1:30:0:11:0	0/0:0,-64.5993,-732.078:10000:PASS:50745:68273:51208:1:317:0:215:0	0/0:0,-126.742,-1000:10000:PASS:102581:145316:107566:1:588:0:422:0	0/0:0,-32.7421,-374.73:10000:PASS:25763:36233:25900:1:165:1:109:0	0/0:0,-5.71817,-72.3986:57:PASS:9615:13756:9923:1:43:0:19:0	0/0:0,-39.4176,-467.083:10000:PASS:25859:34247:24297:1:153:0:131:0	0/0:0,-68.0029,-809.87:10000:PASS:44565:59662:41773:1:243:0:226:0	0/0:0,-83.0085,-951.324:10000:PASS:64749:87577:67102:1:385:1:276:0	0/0:0,-178.193,-1000:10000:PASS:60560:86504:69845:1:784:0:593:0	0/0:0,-29.1879,-363.588:10000:PASS:13463:19271:16237:1:212:0:97:0	0/0:0,-129.302,-1000:10000:PASS:95904:130879:99340:1:565:0:430:0	0/0:0,-47.1026,-544.441:10000:PASS:41224:57608:42978:1:216:2:157:0	0/0:0,-101.061,-1000:10000:PASS:125880:175899:123162:1:739:4:336:0	0/0:0,-8.12526,-100.797:81:PASS:10658:15344:10793:1:58:0:27:0	0/0:0,-53.6655,-614.281:10000:PASS:47600:68787:49926:1:265:0:179:0	0/0:0,-85.8779,-975.183:10000:PASS:31794:44238:36991:1:484:2:286:0	0/0:0,-117.779,-1000:10000:PASS:39314:50217:40930:1:578:6:392:0	0/0:0,-109.453,-1000:10000:PASS:36997:52802:41946:1:595:0:364:0	0/0:0,-126.361,-1000:10000:PASS:39657:56243:41485:1:487:10:420:0	0/0:0,-18.1826,-1000:10000:PASS:34013:47633:38463:1:514:6:322:24	0/0:0,-71.8126,-820.966:10000:PASS:28584:36825:27802:1:359:0:239:0	0/0:0,-110.549,-1000:10000:PASS:37384:51765:43054:1:588:7:368:0	0/1:-36.755,0,-583.367:10000:PASS:21511:29100:22458:1:257:11:182:29	0/0:0,-102.75,-1000:10000:PASS:37929:53116:43565:1:554:3:342:0	0/0:0,-52.3421,-614.463:10000:PASS:18228:23391:19005:1:237:2:174:0	0/0:0,-91.3185,-1000:10000:PASS:31414:44131:35153:1:437:6:304:0	0/0:0,-172.063,-1000:10000:PASS:59389:84737:68365:1:870:1:572:0	0/0:0,-125.057,-1000:10000:PASS:49571:64063:51053:1:683:1:416:0	0/0:0,-137.898,-1000:10000:PASS:45916:66014:52979:1:686:1:459:0	0/0:0,-115.453,-1000:10000:PASS:38531:54674:43705:1:578:1:384:0	0/0:0,-131.959,-1000:10000:PASS:45171:64212:52209:1:657:4:439:0	0/0:0,-96.8464,-1000:10000:PASS:30202:42913:35669:1:480:1:322:0	0/0:0,-120.62,-1000:10000:PASS:41043:58766:46829:1:614:1:401:0	0/0:0,-100.17,-1000:10000:PASS:34788:48415:38504:1:473:0:333:0
Chr01	17065726	17221064	INV00011122	155338	0.991525	0.00847458	0	0	PASS	PRECISE	INV	60	-7,7	-7,7	TCGTATTGATGACCAAGAAAAGTATGGAAAAGAAGCAAGCTTCAACGCTCCCCAAGACAACAGAGCCCTCATAGTGGGGAGGGTAAAGAGCATCCAACGCAAAGCGACCTTTCATTCCCTGTTGTGCCAGCAGCCAACTCCGGCGTGTCAGCTTAGTTATCCTCATCAAGCCACAACCTTGATGTCTAGCTTCCCAACTGGTAGACGGTTCCCTTTCCCCCGGATCAATGAAG	0/0:0,-5.41528,-63.3967:54:PASS:11708:15173:4257:2:63:0:18:0	0/0:0,-121.867,-1000:10000:PASS:100925:131254:36063:2:764:0:406:0	0/0:0,-229.531,-1000:10000:PASS:205986:274299:76174:2:1395:2:765:0	0/0:0,-56.1727,-599.08:10000:PASS:51849:67913:18934:2:341:0:187:0	0/0:0,-9.62738,-112.694:96:PASS:18863:25196:7226:2:86:0:32:0	0/0:0,-76.7302,-913.768:10000:PASS:50752:64930:18103:2:350:1:255:0	0/0:0,-128.486,-1000:10000:PASS:88629:111930:30804:2:595:2:427:0	0/0:0,-155.546,-1000:10000:PASS:129223:168707:46925:2:808:0:519:0	0/0:0,-128.619,-1000:10000:PASS:119261:168615:41141:2:694:3:428:0	0/0:0,-12.3312,-140.289:123:PASS:26030:37395:9287:2:120:0:41:0	0/0:0,-232.114,-1000:10000:PASS:193397:252396:69488:2:1332:1:773:0	0/0:0,-78.9224,-835.552:10000:PASS:81595:108891:30092:2:452:4:263:0	0/0:0,-180.895,-1000:10000:PASS:250172:325906:92304:2:1697:9:602:0	0/0:0,-11.4284,-129.189:114:PASS:20926:27731:8001:2:111:0:38:0	0/0:0,-104.508,-1000:10000:PASS:94931:127772:35920:2:577:0:349:0	0/0:0,-65.1821,-719.359:10000:PASS:62887:87297:21728:2:399:0:217:0	0/0:0,-85.3634,-964.171:10000:PASS:77043:98609:26000:2:539:0:284:0	0/0:0,-78.7271,-897.157:10000:PASS:74495:102123:25560:2:529:1:262:0	0/0:0,-81.8107,-945.231:10000:PASS:78028:104618:27330:2:414:9:272:0	0/0:0,-19.745,-722.304:10000:PASS:68653:92466:22510:2:434:13:224:15	0/0:0,-66.4305,-743.203:10000:PASS:56480:69644:18893:2:379:2:221:0	0/0:0,-84.6079,-923.417:10000:PASS:73201:101877:25224:2:537:3:282:0	0/1:-5.02861,0,-525.503:50:PASS:42526:56132:14400:2:284:14:176:18	0/0:0,-93.2076,-1000:10000:PASS:75185:104143:25627:2:552:4:310:0	0/0:0,-35.7869,-408.464:10000:PASS:35889:45606:12642:2:193:0:119:0	0/0:0,-66.6089,-752.08:10000:PASS:62708:85025:20986:2:423:2:222:0	0/0:0,-137.074,-1000:10000:PASS:119419:165672:41525:2:855:3:456:0	0/0:0,-121.363,-1000:10000:PASS:98970:125181:34702:2:716:1:404:0	0/0:0,-100.716,-1000:10000:PASS:89958:128072:32149:2:615:2:335:0	0/0:0,-86.3057,-984.41:10000:PASS:76842:106079:25678:2:556:1:287:0	0/0:0,-94.8489,-1000:10000:PASS:90666:124973:30878:2:538:0:316:0	0/0:0,-73.0799,-848.33:10000:PASS:59036:85016:20662:2:452:0:243:0	0/0:0,-84.4842,-963.195:10000:PASS:81917:113350:27342:2:549:1:281:0	0/0:0,-85.05,-989.159:10000:PASS:69295:94049:23610:2:509:1:283:0
Chr01	17069005	17083464	DEL00008029	14459	0.995763	0.00423729	0	0	PASS	PRECISE	DEL	60	-5,5	-5,5	ATACATCCAATACCAATGATCTGTGCCTACCGATACGATACTCCTAAAAAAAATTGACTATATAAAGAGCTAGTGTCAATAAAAAGGCTAATGACAGAGAAGAGTCAATCTCCTTTACTCTTCATGCCCAAAAGCGGATAAAGTAGATGGAACCTGTTCTCTAACCTTCTTTTTGTAGCAGATAC	0/0:0,-11.1351,-141.897:111:PASS:1345:2824:799:3:118:0:37:0	0/0:0,-152.126,-1000:10000:PASS:13878:23070:5442:2:819:0:506:0	0/0:0,-332.918,-1000:10000:PASS:27856:48869:12158:2:1794:4:1108:0	0/0:0,-85.9047,-998.21:10000:PASS:7176:12191:2865:2:447:0:286:0	0/0:0,-24.9774,-317.092:10000:PASS:2176:4639:1333:3:197:0:83:0	0/0:0,-87.5648,-1000:10000:PASS:7694:11467:2515:2:333:8:291:0	0/0:0,-140.825,-1000:10000:PASS:12791:19359:4252:2:563:3:468:0	0/0:0,-211.418,-1000:10000:PASS:17519:29710:7187:2:1005:7:704:0	0/0:0,-188.845,-1000:10000:PASS:16218:26987:6657:2:914:3:628:0	0/0:0,-24.0745,-301.892:10000:PASS:3025:6109:1682:3:233:0:80:0	0/0:0,-308.454,-1000:10000:PASS:26386:43780:10788:2:1527:2:1027:0	0/0:0,-138.94,-1000:10000:PASS:10507:19504:5016:3:724:4:462:0	0/0:0,-252.101,-1000:10000:PASS:34508:60217:14351:2:2091:3:838:0	0/0:0,-21.0659,-264.294:10000:PASS:2520:5174:1502:3:222:0:70:0	0/0:0,-161.572,-1000:10000:PASS:12291:23259:5870:3:845:2:538:0	0/0:0,-92.3184,-1000:10000:PASS:7710:12725:3388:2:552:2:307:0	0/0:0,-120.007,-1000:10000:PASS:10110:15970:3952:2:640:3:399:0	0/0:0,-111.315,-1000:10000:PASS:9281:15544:4047:2:655:1:370:0	0/0:0,-126.373,-1000:10000:PASS:10422:17536:4255:2:529:1:420:0	0/0:0,-104.692,-1000:10000:PASS:8399:13636:3394:2:570:0:348:0	0/0:0,-83.0072,-965.823:10000:PASS:7429:11312:2696:2:409:1:276:0	0/0:0,-106.777,-1000:10000:PASS:9254:15179:3931:2:602:3:355:0	0/0:0,-63.1417,-745.625:10000:PASS:5865:8722:2066:2:310:0:210:0	0/0:0,-112.814,-1000:10000:PASS:9711:15305:3958:2:612:4:375:0	0/0:0,-54.7604,-653.273:10000:PASS:4567:7579:2019:2:290:2:182:0	0/0:0,-89.7495,-1000:10000:PASS:7694:12774:3178:2:486:0:299:0	0/0:0,-190.416,-1000:10000:PASS:16244:25403:6463:2:1033:4:633:0	0/0:0,-161.786,-1000:10000:PASS:12989:20660:5298:2:861:2:538:0	0/0:0,-144.84,-1000:10000:PASS:11878:19113:4812:2:803:0:482:0	0/0:0,-117.327,-1000:10000:PASS:9551:15865:3923:2:638:0:390:0	0/0:0,-131.113,-1000:10000:PASS:10987:17721:4582:2:705:0:436:0	0/0:0,-89.6643,-1000:10000:PASS:8074:12658:3265:2:547:1:298:0	0/0:0,-115.8,-1000:10000:PASS:9983:16733:4127:2:682:0:385:0	0/0:0,-112.523,-1000:10000:PASS:8838:14168:3312:2:534:3:374:0
Chr01	17082188	17235784	INV00011175	153596	0.995763	0.00423729	0	0	PASS	PRECISE	INV	60	-2,2	-2,2	CTGTCTTCGAAATGCTATTCGTTTAGTCGAATGCCAACACTACAATTGATAAATATCATGTCCTTTCGAAAATAAATAGAATGTGCTTATCTCTTTCCTCTCAATTGTTTCATCCAGAAGAGAGGCAGTGGGCTATTCGAGAGAGTGGTTCAGGTGACTACCGGAGTCATTGATTAAGCAGGTCAGA	0/0:0,-14.1399,-176.292:141:PASS:10892:15143:1418:2:117:3:47:0	0/0:0,-173.222,-1000:10000:PASS:97502:129450:11783:2:924:16:577:0	0/0:0,-377.03,-1000:10000:PASS:197558:270775:25420:2:2074:21:1255:0	0/0:0,-92.6132,-1000:10000:PASS:49739:66946:6308:2:493:16:308:0	0/0:0,-24.9796,-319.894:10000:PASS:17694:25333:2500:3:177:1:83:0	0/0:0,-83.5184,-988.932:10000:PASS:49813:63797:5640:2:336:10:278:0	0/0:0,-145.003,-1000:10000:PASS:85905:109764:10090:2:599:11:482:0	0/0:0,-230.119,-1000:10000:PASS:124402:167124:15011:2:1121:12:766:0	0/0:0,-190.132,-1000:10000:PASS:114718:165306:13916:3:961:2:633:0	0/0:0,-26.0774,-324.588:10000:PASS:24412:37296:3183:3:253:1:87:0	0/0:0,-335.858,-1000:10000:PASS:184713:249353:22561:2:1675:25:1118:0	0/0:0,-148.299,-1000:10000:PASS:77819:108033:10059:2:722:14:493:0	0/0:0,-279.133,-1000:10000:PASS:242057:321110:29656:2:2223:31:930:0	0/0:0,-28.5903,-364.892:10000:PASS:19590:27784:2750:2:246:3:95:0	0/0:0,-186.784,-1000:10000:PASS:90136:126556:12137:2:950:15:621:0	0/0:0,-107.042,-1000:10000:PASS:58661:86773:8221:3:595:0:356:0	0/0:0,-120.248,-1000:10000:PASS:72697:96946:9608:2:675:0:400:0	0/0:0,-120.575,-1000:10000:PASS:69397:101237:9282:3:702:14:401:0	0/0:0,-122.016,-1000:10000:PASS:74001:103600:8932:2:514:29:406:0	0/0:0,-111,-1000:10000:PASS:63443:91356:8337:3:617:0:369:0	0/0:0,-79.9908,-933.317:10000:PASS:54359:68618:6918:2:400:1:266:0	0/0:0,-125.549,-1000:10000:PASS:68807:101074:9295:3:690:0:418:0	0/0:0,-59.9875,-711.081:10000:PASS:41194:55277:5064:2:323:0:200:0	0/0:0,-120.932,-1000:10000:PASS:70682:103067:9283:3:618:2:402:0	0/0:0,-51.7508,-620.874:10000:PASS:33660:45263:4667:2:280:1:172:0	0/0:0,-102.423,-1000:10000:PASS:58180:84424:7467:3:536:2:341:0	0/0:0,-191.21,-1000:10000:PASS:113257:164208:13954:3:1017:28:636:0	0/0:0,-166.951,-1000:10000:PASS:93026:124423:12242:2:878:8:555:0	0/0:0,-153.719,-1000:10000:PASS:85756:127332:11390:3:818:6:511:0	0/0:0,-114.542,-1000:10000:PASS:72051:104594:9434:3:680:1:381:0	0/0:0,-148.141,-1000:10000:PASS:83429:124519:11460:3:794:1:493:0	0/0:0,-104.045,-1000:10000:PASS:56291:84229:7183:3:563:17:346:0	0/0:0,-133.45,-1000:10000:PASS:76451:111783:10254:3:785:2:444:0	0/0:0,-110.705,-1000:10000:PASS:65067:93168:8358:3:550:2:368:0
Chr01	17142715	17175971	INV00011211	33256	0.991525	0.00847458	0	0	PASS	PRECISE	INV	60	-5,5	-5,5	TTTCCATATAGAAAAGGAACTAATACACATCTCCTTTAGAAAAGAATTTCCCATAATGACTATGAATGCTTGTACCTGAAGTGACCAAATAAGGCTTAGCTGATCTTCTAATTCAAGAATAACCACTATTGTGGTTATTCAAACATAAAAACAGGGTTCGAACTCCCATACTTTTTGTATCAGATCGCGGAGAAAGTCAACAAATGGATCCATTGTAGCTGTCACAATCCC	0/0:0,-9.93114,-125.497:99:PASS:2043:4220:3200:2:104:1:33:0	0/0:0,-145.874,-1000:10000:PASS:17819:33500:27239:1:808:1:486:0	0/0:0,-325.731,-1000:10000:PASS:38056:71693:56207:2:1728:1:1083:0	0/0:0,-89.9389,-1000:10000:PASS:9281:17765:13804:2:444:0:299:0	0/0:0,-19.1524,-235.886:10000:PASS:3410:7047:5438:2:169:1:64:0	0/0:0,-77.0301,-913.066:10000:PASS:9036:16474:12801:2:309:0:256:0	0/0:0,-127.281,-1000:10000:PASS:16201:29229:21760:2:528:0:423:0	0/0:0,-202.407,-1000:10000:PASS:22694:43319:36174:1:961:0:673:0	0/0:0,-155.102,-1000:10000:PASS:19326:56676:32406:2:792:2:516:0	0/0:0,-27.3864,-348.093:10000:PASS:4132:13961:7093:2:229:1:91:0	0/0:0,-271.07,-1000:10000:PASS:34233:64557:52819:1:1380:3:902:0	0/0:0,-127.183,-1000:10000:PASS:14998:28884:23213:2:647:0:423:0	0/0:0,-232.217,-1000:10000:PASS:44440:83307:68570:1:1899:3:772:0	0/0:0,-21.0667,-267.695:10000:PASS:3775:7786:5769:2:191:0:70:0	0/0:0,-158.196,-1000:10000:PASS:17984:34266:26518:2:803:1:526:0	0/0:0,-87.1794,-1000:10000:PASS:10327:30415:16984:2:515:2:290:0	0/0:0,-100.479,-1000:10000:PASS:8755:33755:19689:2:347:1:334:0	0/0:0,-111.31,-1000:10000:PASS:12221:35537:19133:2:633:1:370:0	0/0:0,-108.557,-1000:10000:PASS:12079:36091:19668:2:410:15:361:0	0/0:0,-93.2009,-1000:10000:PASS:11155:32536:17623:2:567:2:310:0	0/0:0,-80.6303,-956.854:10000:PASS:8200:23565:12392:2:431:1:268:0	0/0:0,-105.384,-1000:10000:PASS:11788:36038:19594:2:622:2:351:0	0/1:-45.7039,0,-677.354:10000:PASS:6749:18469:10489:2:287:30:210:33	0/0:0,-114.316,-1000:10000:PASS:12424:36111:20051:2:645:2:380:0	0/0:0,-50.2518,-606.88:10000:PASS:4153:14954:9605:2:153:1:167:0	0/0:0,-87.8066,-1000:10000:PASS:10496:30160:15874:2:500:2:292:0	0/0:0,-169.679,-1000:10000:PASS:19229:55042:32668:2:914:6:564:0	0/0:0,-130.211,-1000:10000:PASS:11405:40943:25488:2:466:1:433:0	0/0:0,-138.978,-1000:10000:PASS:15534:44738:24190:2:741:0:462:0	0/0:0,-115.816,-1000:10000:PASS:12744:37024:19753:2:673:1:385:0	0/0:0,-141.067,-1000:10000:PASS:15597:44775:23950:2:756:0:469:0	0/0:0,-98.6671,-1000:10000:PASS:9610:29270:16593:2:517:1:328:0	0/0:0,-126.355,-1000:10000:PASS:14525:39685:21359:2:708:5:420:0	0/0:0,-108.006,-1000:10000:PASS:11249:32587:17691:2:511:1:359:0
Chr01	17142821	17145576	INV00011212	2755	0.995763	0.00423729	0	0	PASS	PRECISE	INV	60	-3,3	-3,3	GTCACTTGTCCCTATCCCTAAATTTACATAGACCATCTCCCCTTCCCCCGTCCCTGTCAACTAGAAAGCTAGTAAGCAACCGATCGGCAAAACACAACCGGTCTAGCTTGGATTCAATTGGACATTAGTTTCTTCCAAAAGCCTCCCTAGTGCAGATTCTATTTTGAGTTTTATAATCTCAATATCCAATGTGTGGGCGTGGATTTGTTCTCT	0/0:0,-9.92959,-125.196:99:PASS:430:903:454:2:115:0:33:0	0/0:0,-156.232,-1000:10000:PASS:3514:6261:3173:2:836:1:520:0	0/0:0,-351.307,-1000:10000:PASS:7245:13194:7000:2:1945:3:1169:0	0/0:0,-91.0273,-1000:10000:PASS:1816:3443:1781:2:473:0:303:0	0/0:0,-23.1697,-288.99:10000:PASS:720:1488:732:2:187:1:77:0	0/0:0,-77.3315,-919.767:10000:PASS:1743:3226:1462:2:305:0:257:0	0/0:0,-142.307,-1000:10000:PASS:2964:5754:2804:2:576:0:473:0	0/0:0,-224.956,-1000:10000:PASS:4453:8100:4283:2:1080:1:748:0	0/0:0,-159.817,-1000:10000:PASS:3280:6432:3482:2:789:2:532:0	0/0:0,-29.4904,-368.789:10000:PASS:817:1718:890:2:211:2:98:0	0/0:0,-318.336,-1000:10000:PASS:6282:12217:6035:2:1540:3:1059:0	0/0:0,-139.655,-1000:10000:PASS:2800:5550:2797:2:718:5:465:0	0/0:0,-265.841,-1000:10000:PASS:8602:16805:8618:2:2104:5:884:0	0/0:0,-28.8906,-362.892:10000:PASS:799:1690:829:2:221:0:96:0	0/0:0,-172.226,-1000:10000:PASS:3433:6740:3357:2:905:2:573:0	0/0:0,-87.3187,-996.319:10000:PASS:1824:3820:1920:2:547:2:291:0	0/0:0,-101.614,-1000:10000:PASS:38:4142:2177:4:450:4:338:0	0/0:0,-111.298,-1000:10000:PASS:2124:4309:2211:2:642:2:370:0	0/0:0,-114.323,-1000:10000:PASS:2030:4541:2463:2:489:14:380:0	0/0:0,-104.988,-1000:10000:PASS:1792:3994:2077:2:585:1:349:0	0/0:0,-74.6032,-874.048:10000:PASS:1380:3289:1512:2:427:2:248:0	0/0:0,-102.752,-1000:10000:PASS:1999:4258:2240:2:640:0:342:0	0/0:0,-59.5311,-708.727:10000:PASS:1158:2426:1183:2:312:1:198:0	0/0:0,-109.403,-1000:10000:PASS:2177:4281:2164:2:643:1:364:0	0/0:0,-56.26,-668.667:10000:PASS:21:2042:1113:4:216:0:187:0	0/0:0,-97.7209,-1000:10000:PASS:1824:3777:1886:2:535:10:325:0	0/0:0,-175.565,-1000:10000:PASS:3252:6680:3491:2:954:3:584:0	0/0:0,-138.343,-1000:10000:PASS:28:5583:2857:4:603:5:460:0	0/0:0,-131.771,-1000:10000:PASS:2654:5435:2742:2:743:1:438:0	0/0:0,-109.47,-1000:10000:PASS:2242:4557:2296:2:693:15:364:0	0/0:0,-138.08,-1000:10000:PASS:2669:5427:2779:2:790:2:459:0	0/0:0,-85.4234,-1000:10000:PASS:1691:3394:1683:2:513:2:284:0	0/0:0,-124.243,-1000:10000:PASS:2278:4857:2480:2:728:7:413:0	0/0:0,-104.712,-1000:10000:PASS:1962:4042:2092:2:543:8:348:0
Chr01	17145599	17159263	INV00011226	13664	0.974576	0.0254237	0	0	PASS	PRECISE	INV	60	-4,4	-4,4	GCTTATAAAGCGGGGCAAGTTTTTGGTCTTAGAGAACAAATCCACGCCCACACATTGGATATTGAGATTATAAAACATAAAATAGAATCTGCACTAGGGAGGCTCGATGGACCTGCAGACGTAGGAAGACTTTTCTCGCCAACTGAACTGCCCAAAGCGACTTCCTCAGGAAGGTACGGTCTGACGAGGACCAATTTCAGTTC	0/0:0,-6.92221,-89.0985:69:PASS:1748:1168:260:1:62:0:23:0	0/0:0,-75.4377,-873.279:10000:PASS:14004:8768:2318:1:435:1:251:0	0/0:0,-181.197,-1000:10000:PASS:29407:19208:5147:1:1026:3:603:0	0/0:0,-45.1227,-522.168:10000:PASS:7484:4857:1318:1:239:0:150:0	0/0:0,-11.1357,-143.398:111:PASS:2916:1891:474:1:109:0:37:0	0/0:0,-34.9041,-414.885:10000:PASS:7086:4094:1258:1:137:0:116:0	0/0:0,-64.394,-766.274:10000:PASS:12612:7556:2086:1:254:0:214:0	0/0:0,-117.606,-1000:10000:PASS:17846:11251:3224:1:572:1:391:0	0/0:0,-154.404,-1000:10000:PASS:14692:12706:18325:1:788:0:514:0	0/0:0,-24.6767,-307.992:10000:PASS:3517:2933:4774:1:172:1:82:0	0/0:0,-153.023,-1000:10000:PASS:26857:16429:4716:1:785:2:509:0	0/0:0,-69.6292,-817.19:10000:PASS:11784:7674:2310:1:360:0:232:0	0/0:0,-130.592,-1000:10000:PASS:35691:23009:4282:1:1072:2:434:0	0/0:0,-16.2506,-203.795:10000:PASS:3242:2055:547:1:126:0:54:0	0/0:0,-83.6379,-991.852:10000:PASS:14306:9132:2712:1:465:1:278:0	0/0:0,-82.0109,-934.33:10000:PASS:8293:7182:9148:1:511:2:273:0	0/0:0,-100.481,-1000:10000:PASS:5525:8450:11498:1:615:4:334:0	0/0:0,-103.171,-1000:10000:PASS:9558:8372:10770:1:635:1:343:0	0/0:0,-101.898,-1000:10000:PASS:9557:8827:10550:1:464:12:339:0	0/0:0,-97.4716,-1000:10000:PASS:8633:7909:9739:1:567:3:324:0	0/0:0,-74.3125,-878.058:10000:PASS:6829:5290:6358:1:427:2:247:0	0/1:-4.15134,0,-906.076:42:PASS:9340:8336:10972:1:598:5:295:29	0/0:0,-55.0109,-635.021:10000:PASS:5384:4213:5226:1:314:1:184:0	0/0:0,-100.137,-1000:10000:PASS:9572:8442:10926:1:596:0:333:0	0/0:0,-50.2306,-594.759:10000:PASS:2697:3839:4690:1:268:2:167:0	0/0:0,-83.1676,-960.982:10000:PASS:8317:7101:9011:1:490:10:277:0	0/0:0,-159.084,-1000:10000:PASS:14641:12911:16603:1:870:2:529:0	0/0:0,-126.032,-1000:10000:PASS:7308:10572:12604:1:724:7:419:0	0/0:0,-118.955,-1000:10000:PASS:12067:10471:13518:1:714:0:396:0	0/0:0,-101.077,-1000:10000:PASS:10019:8821:11141:1:648:15:336:0	0/0:0,-125.728,-1000:10000:PASS:12013:10595:13400:1:744:3:418:0	0/0:0,-75.2139,-893.856:10000:PASS:7542:6782:8900:1:496:1:250:0	0/0:0,-23.4227,-1000:10000:PASS:10657:9248:12061:1:691:15:351:25	0/0:0,-100.442,-1000:10000:PASS:8807:7607:9895:1:535:8:334:0
Chr01	17519618	17524770	DEL00008184	5152	0.991525	0.00847458	0	0	PASS	PRECISE	DEL	60	-2,2	-2,2	GACTTCTTTTGTGCTCAGGCTCGCGCCTCTAGCACGGTCTAGGCTAGGATCAGCACAATACTGCTGTTGAACGATTATTCAGCGCCTCTCTTGTGAAGTCCCTTTGTTTATATCATCAGTTTTGAGGATCCCCTGAAATAAAATGAAAAAAAGAAGAAGAAGAGAAAAAGTAAAAGAAAAGAAAAAAAAG	0/0:0,-1.79682,-20.1906:18:PASS:58:190:84:3:9:0:6:0	0/0:0,-14.1358,-160.887:141:PASS:418:794:434:2:68:0:47:0	0/0:0,-11.4299,-137.191:114:PASS:409:953:463:2:66:1:38:0	0/0:0,-10.8262,-122.289:108:PASS:350:747:375:2:60:0:36:0	0/0:0,-1.50479,-19.0996:15:PASS:96:246:110:2:12:0:5:0	0/0:0,-8.125,-97.8972:81:PASS:322:567:316:2:28:3:27:0	0/0:0,-8.42533,-99.6965:84:PASS:332:690:320:2:36:0:28:0	0/0:0,-10.522,-122.486:105:PASS:432:805:398:2:45:0:35:0	0/0:0,-11.3667,-123.728:114:PASS:487:935:485:2:58:0:38:0	0/0:0,-1.50491,-19.7998:15:PASS:97:242:94:3:18:0:5:0	0/0:0,-15.9384,-182.284:157:PASS:530:995:538:2:76:0:53:0	0/0:0,-13.2376,-154.492:132:PASS:473:1005:471:2:60:0:44:0	0/0:0,-16.3886,-198.032:10000:PASS:853:1797:880:2:122:1:55:0	0/0:0,-1.80581,-23.3996:18:PASS:83:181:73:2:12:0:6:0	0/0:0,-12.3324,-145.99:123:PASS:406:933:408:2:59:0:41:0	0/0:0,-6.9107,-75.787:69:PASS:263:604:269:2:45:1:23:0	0/0:0,-6.91407,-80.8904:69:PASS:231:555:262:2:43:0:23:0	0/0:0,-3.30897,-38.5976:33:PASS:245:517:244:2:49:0:11:0	0/0:0,-14.74,-171.89:147:PASS:504:916:336:2:48:0:49:0	0/0:0,-7.52037,-87.9946:75:PASS:271:558:270:2:37:0:25:0	0/0:0,-12.0311,-138.39:120:PASS:428:813:380:2:56:2:40:0	0/0:0,-9.31725,-100.985:93:PASS:310:695:324:2:51:0:31:0	0/0:0,-7.81928,-92.8925:78:PASS:352:623:275:2:36:0:26:0	0/0:0,-8.7251,-102.095:87:PASS:246:502:259:2:48:2:29:0	0/0:0,-6.61818,-77.5955:66:PASS:274:540:270:2:36:0:22:0	0/0:0,-7.21533,-80.9906:72:PASS:219:469:204:2:30:0:24:0	0/0:0,-19.5573,-232.29:10000:PASS:681:1245:616:2:94:0:65:0	0/0:0,-3.912,-47.4986:39:PASS:246:521:256:2:39:0:13:0	0/0:0,-3.30924,-38.5979:33:PASS:245:492:242:2:33:1:11:0	0/0:0,-7.82125,-90.5945:78:PASS:274:547:288:2:54:0:26:0	0/0:0,-6.61701,-76.0943:66:PASS:199:501:227:2:33:0:22:0	0/0:0,-3.91169,-47.0983:39:PASS:235:499:241:2:39:0:13:0	0/0:0,-9.62727,-112.694:96:PASS:274:608:290:2:52:2:32:0	0/0:0,-8.12346,-96.9957:81:PASS:234:504:219:2:36:0:27:0
Chr01	19632456	19634062	DUP00005618	1606	0.995763	0.00423729	0	0	PASS	PRECISE	DUP	60	-3,3	-3,3	CAACACCAAGCCCAACTCTTTAGCAGTAGTTGCTAACTTTGTTAGTGGCCTAGGATCTGCTATCGAGTCCAAACCAATGAATAAAAAAGGGCTTAGGCCAATTGGCCTATGGAGGCCTAGGCCAATCAGCCTAGGGTCCTCTAGGCTCCT	0/0:0,-1.50483,-19.2997:15:PASS:15:50:25:3:11:0:5:0	0/0:0,-11.0055,-128.867:110:PASS:133:249:127:2:61:0:37:0	0/0:0,-13.8314,-159.084:138:PASS:149:278:142:2:67:0:46:0	0/0:0,-8.7235,-99.3936:87:PASS:114:233:115:2:46:0:29:0	0/0:0,-1.5046,-18.4995:15:PASS:22:48:43:1:13:0:5:0	0/0:0,-8.42543,-99.8966:84:PASS:87:224:111:2:36:0:28:0	0/0:0,-10.8321,-127.995:108:PASS:87:216:118:2:46:0:36:0	0/0:0,-11.7336,-139.193:117:PASS:144:274:146:2:62:0:39:0	0/0:0,-14.7264,-169.576:147:PASS:129:301:149:2:65:0:49:0	0/0:0,-2.70883,-35.5996:27:PASS:23:46:31:2:9:0:9:0	0/0:0,-17.0462,-197.788:10000:PASS:168:332:191:2:82:0:57:0	0/0:0,-15.0391,-176.988:150:PASS:139:289:180:2:72:0:50:0	0/0:0,-14.1435,-175.095:141:PASS:270:542:317:2:116:0:47:0	0/0:0,-2.10671,-26.7995:21:PASS:20:64:41:2:15:0:7:0	0/0:0,-12.0308,-138.29:120:PASS:136:306:152:2:76:0:40:0	0/0:0,-7.81172,-84.8849:78:PASS:84:181:97:2:50:0:26:0	0/0:0,-7.52139,-88.4956:75:PASS:77:179:108:2:47:0:25:0	0/0:0,-6.31275,-72.6911:63:PASS:69:154:76:2:35:0:21:0	0/0:0,-10.2285,-121.294:102:PASS:98:213:137:2:38:0:34:0	0/0:0,-8.12261,-95.0948:81:PASS:84:167:73:2:40:1:27:0	0/0:0,-9.92838,-116.694:99:PASS:98:203:101:2:48:0:33:0	0/0:0,-10.2258,-117.491:102:PASS:101:194:119:2:55:0:34:0	0/0:0,-6.92007,-81.6964:69:PASS:95:174:118:2:36:0:23:0	0/0:0,-6.61866,-77.196:66:PASS:61:149:65:2:32:0:22:0	0/0:0,-6.01829,-72.5977:60:PASS:79:149:65:2:31:0:20:0	0/0:0,-6.31276,-70.6911:63:PASS:66:156:76:2:37:0:21:0	0/0:0,-18.5935,-217.33:10000:PASS:175:371:218:2:103:0:62:0	0/0:0,-8.11222,-91.3844:81:PASS:60:159:97:2:47:0:27:0	0/0:0,-5.40598,-62.3874:54:PASS:90:144:62:2:29:0:18:0	0/0:0,-6.01782,-72.1972:60:PASS:73:155:86:2:40:0:20:0	0/0:0,-6.92007,-82.2964:69:PASS:66:131:77:2:34:0:23:0	0/0:0,-5.4166,-65.2981:54:PASS:71:140:67:2:39:0:18:0	0/0:0,-9.9298,-118.796:99:PASS:84:197:86:2:51:0:33:0	0/0:0,-7.21947,-84.8948:72:PASS:74:172:95:2:37:0:24:0
Chr01	21170005	21174355	DUP00005974	4350	0.927966	0.0720339	0	0	PASS	PRECISE	DUP	60	-6,6	-6,6	AGGCAATGGTTTGGCAATGGCTTGGGAACTTTAAGATGACGGGTCCCATTGAGTGCACTTCTTTGATCACTCACATCGCTATGAGGATCGGGGCTCTAGATGAGATTACTATTCTTTGTACCAAGTTGTCCTTGTATATTTTGCTTTTCTTTCCTTCTACCTTTATCCCTATTACCCATGGAGAAGCCTTCCTGTCAAAGCCTCTCTACTCCAAGGGCTGAGTTCT	0/1:-12.8914,0,-15.391:129:PASS:60:225:91:3:10:11:5:4	0/1:-96.7447,0,-72.5036:10000:PASS:347:1502:369:4:58:68:26:33	0/1:-74.1324,0,-141.83:10000:PASS:364:1573:447:4:72:69:46:28	0/1:-130.769,0,-81.6307:10000:PASS:358:1436:367:4:62:48:32:43	0/1:-22.1845,0,-28.084:10000:PASS:88:326:136:3:17:11:9:7	0/1:-93.4482,0,-62.4498:10000:PASS:307:1170:333:4:33:27:22:31	0/1:-54.0551,0,-85.354:10000:PASS:301:1105:287:4:37:25:28:19	0/1:-117.142,0,-67.4421:10000:PASS:376:1492:422:4:47:53:25:37	0/0:0,-11.1019,-126.664:111:PASS:414:857:418:2:68:5:37:0	0/0:0,-1.50453,-18.3994:15:PASS:81:151:96:2:12:0:5:0	0/1:-105.932,0,-145.616:10000:PASS:435:1832:500:4:84:59:51:37	0/1:-116.426,0,-117.628:10000:PASS:392:1566:443:4:64:47:41:39	0/1:-138.212,0,-153.307:10000:PASS:758:3089:785:4:123:119:51:45	0/1:-31.3869,0,-11.4871:115:PASS:73:275:108:3:13:14:4:9	0/1:-123.325,0,-113.833:10000:PASS:342:1441:377:4:70:73:40:42	0/0:0,-6.31816,-73.5965:63:PASS:231:453:270:2:34:0:21:0	0/0:0,-4.21051,-48.1961:42:PASS:211:442:202:2:30:0:14:0	0/0:0,-5.71606,-66.7965:57:PASS:199:409:209:2:41:1:19:0	0/1:-143.322,0,-95.4326:10000:PASS:301:1456:405:4:50:49:33:47	0/0:0,-5.71501,-66.3954:57:PASS:219:457:195:2:31:1:19:0	0/0:0,-9.92468,-112.491:99:PASS:304:719:371:2:62:1:33:0	0/0:0,-6.91854,-79.4949:69:PASS:286:511:274:2:46:0:23:0	0/0:0,-5.71563,-66.9961:57:PASS:242:546:244:2:39:1:19:0	0/0:0,-6.01475,-67.7942:60:PASS:175:401:219:2:38:0:20:0	0/0:0,-6.00398,-69.4834:60:PASS:230:406:229:2:37:1:20:0	0/0:0,-4.81305,-56.0966:48:PASS:195:353:196:2:23:0:16:0	0/0:0,-16.2391,-187.984:10000:PASS:515:1040:536:2:91:2:54:0	0/0:0,-4.20939,-47.795:42:PASS:208:429:225:2:29:1:14:0	0/0:0,-8.12131,-94.6935:81:PASS:211:442:228:2:41:1:27:0	0/0:0,-8.72482,-101.395:87:PASS:240:474:256:2:50:0:29:0	0/0:0,-5.41476,-63.2962:54:PASS:187:378:193:2:34:0:18:0	0/0:0,-6.61977,-79.3971:66:PASS:210:389:189:2:39:0:22:0	0/0:0,-6.61694,-75.6943:66:PASS:237:511:238:2:44:0:22:0	0/0:0,-6.61893,-77.7963:66:PASS:233:388:226:2:37:1:22:0
Chr01	21964375	21976973	DEL00010008	12598	0.995763	0	0.00423729	0	PASS	PRECISE	DEL	60	-3,3	-3,3	AAATTGAGTTTAGTACCTTTCTTTTTATGACAGGTGGGCCCACCATTTCCCCGATCCACAAGCTCCCTTCGCCCCGCGTCCCTTCCTGGACCTAGATCCTTGCTAAGTGACTTAACCGATACTAGATGGAATTAATTGAAAGAGAGCACTCAACGTGGAATTAATAGTAGATTCAAAACCTTTTTGTTTTGCTACT	0/0:0,-1.80581,-23.1996:18:PASS:166:304:257:1:14:0:6:0	0/0:0,-12.9244,-151.08:129:PASS:994:1658:726:2:51:0:43:0	0/0:0,-10.8262,-124.189:108:PASS:983:1681:896:2:43:0:36:0	0/0:0,-9.62712,-112.694:96:PASS:858:1530:757:2:33:0:32:0	0/0:0,-2.10657,-26.1994:21:PASS:257:488:318:2:18:0:7:0	0/0:0,-9.62942,-115.596:96:PASS:846:1239:464:2:17:0:32:0	0/0:0,-8.72577,-103.996:87:PASS:780:1283:539:2:24:0:29:0	0/0:0,-12.3291,-144.087:123:PASS:920:1640:628:2:37:1:41:0	0/0:0,-16.8427,-194.785:10000:PASS:1134:1894:433:2:60:1:56:0	0/0:0,-1.50342,-17.3983:15:PASS:227:356:133:2:14:0:5:0	0/0:0,-12.9306,-146.386:129:PASS:1175:2182:868:2:47:0:43:0	0/0:0,-12.9351,-150.591:129:PASS:1283:2080:932:2:48:0:43:0	0/0:0,-10.2279,-121.593:102:PASS:2236:3612:1412:2:76:0:34:0	0/0:0,-1.80579,-23.0996:18:PASS:214:382:294:2:18:0:6:0	0/0:0,-12.936,-149.592:129:PASS:1082:1742:987:2:47:1:43:0	0/0:0,-8.42213,-96.3933:84:PASS:693:1117:584:2:32:0:28:0	0/0:0,-7.81655,-86.4898:78:PASS:668:1003:555:2:30:0:26:0	0/0:0,-6.01763,-71.297:60:PASS:612:1027:493:2:30:0:20:0	0/0:0,-12.0324,-141.491:120:PASS:1254:1766:727:2:36:0:40:0	0/0:0,-6.3194,-76.8978:63:PASS:657:1031:443:2:33:0:21:0	0/0:0,-9.32375,-108.792:93:PASS:1040:1427:234:2:44:0:31:0	0/0:0,-9.02075,-102.09:90:PASS:784:1339:595:2:32:0:30:0	0/0:0,-9.32533,-110.093:93:PASS:724:1005:138:2:27:0:31:0	0/0:0,-5.4159,-63.7974:54:PASS:545:893:493:2:24:0:18:0	0/0:0,-7.21919,-85.1945:72:PASS:608:1013:482:2:30:1:24:0	0/0:0,-6.01611,-68.7955:60:PASS:542:817:395:2:18:0:20:0	0/0:0,-17.1521,-206.493:10000:PASS:1597:2160:563:2:57:0:57:0	0/0:0,-7.51576,-84.99:75:PASS:633:1071:577:2:32:0:25:0	0/0:0,-7.21934,-83.3946:72:PASS:642:988:500:2:26:0:24:0	0/0:0,-7.22072,-85.096:72:PASS:740:1080:558:2:33:0:24:0	0/0:0,-8.42386,-98.795:84:PASS:473:787:232:2:35:0:28:0	0/0:0,-7.2206,-86.1959:72:PASS:563:953:483:2:33:0:24:0	0/0:0,-9.0269,-107.696:90:PASS:691:1078:492:2:29:0:30:0	0/0:0,-9.32812,-112.396:93:PASS:628:1007:474:2:34:1:31:0
Chr01	23017586	23023695	DEL00010358	6109	0.978814	0.0211864	0	0	PASS	PRECISE	DEL	60	-2,2	-2,2	TACACGGGCACATTAGGTAATAATGTTGGTGTTTCACCACCAAACCCTTGCCAACTATACCGTACTCCAAAAAATGTGTGTTACCAAAGAAAATGTGGAAGGTAAAGTGCATGAAAGAAATCAGCGCTCGTATAGCAAAAAAAGGAGAGGGTGAATTAGTAGGCTATCTTAAATTCCTTAGCTTATGGTTTTGGCTTCCACTAC	0/0:0,-1.80579,-23.1996:18:PASS:71:143:137:1:11:0:6:0	0/0:0,-10.5302,-124.394:105:PASS:414:685:513:1:58:0:35:0	0/0:0,-12.301,-144.859:123:PASS:394:788:607:2:71:0:41:0	0/0:0,-8.39683,-96.868:84:PASS:361:612:472:1:51:0:28:0	0/0:0,-2.40761,-30.2994:24:PASS:103:194:192:1:17:0:8:0	0/0:0,-7.52275,-89.397:75:PASS:273:511:414:1:30:0:25:0	0/0:0,-9.32745,-109.996:93:PASS:296:535:403:2:32:0:31:0	0/0:0,-12.0344,-141.093:120:PASS:335:693:558:2:51:0:40:0	0/0:0,-14.7369,-172.586:147:PASS:448:761:632:1:47:0:49:0	0/0:0,-2.10672,-26.7995:21:PASS:74:176:152:2:11:0:7:0	0/0:0,-13.8181,-157.871:138:PASS:437:891:626:2:65:0:46:0	0/0:0,-15.7817,-186.427:157:PASS:464:849:704:1:86:0:53:0	0/0:0,-16.5452,-199.089:10000:PASS:768:1457:1117:2:117:0:55:0	0/0:0,-2.40701,-28.7988:24:PASS:116:197:148:1:17:0:8:0	0/0:0,-14.4417,-172.392:144:PASS:425:761:590:1:67:0:48:0	0/0:0,-10.224,-114.589:102:PASS:303:546:368:2:57:0:34:0	0/0:0,-7.52261,-90.1969:75:PASS:248:467:337:2:42:0:25:0	0/0:0,-9.32652,-109.695:93:PASS:191:475:310:2:45:0:31:0	0/0:0,-13.5375,-161.991:135:PASS:333:757:639:2:64:0:45:0	0/0:0,-1.71605,-57.4976:17:PASS:325:459:327:1:30:3:17:1	0/0:0,-9.32691,-109.795:93:PASS:203:662:413:2:48:0:31:0	0/0:0,-9.622,-108.389:96:PASS:324:581:405:2:54:1:32:0	0/0:0,-6.62037,-81.0977:66:PASS:205:406:335:2:25:0:22:0	0/0:0,-7.22114,-85.6964:72:PASS:264:418:260:2:41:0:24:0	0/0:0,-7.52125,-87.9955:75:PASS:219:429:372:1:30:0:25:0	0/0:0,-5.71429,-65.3947:57:PASS:217:389:291:2:35:0:19:0	0/0:0,-20.4594,-244.989:10000:PASS:684:1133:730:2:98:0:68:0	0/0:0,-7.82297,-92.4962:78:PASS:158:439:319:2:41:0:26:0	0/0:0,-8.42607,-102.697:84:PASS:209:442:330:2:45:0:28:0	0/0:0,-7.5183,-88.0925:75:PASS:260:506:376:2:51:0:25:0	0/0:0,-6.92075,-82.9971:69:PASS:171:381:314:2:26:0:23:0	0/0:0,-6.92048,-82.4968:69:PASS:202:456:323:2:52:1:23:0	0/0:0,-8.72428,-103.094:87:PASS:305:512:368:2:49:0:29:0	0/0:0,-8.72439,-104.995:87:PASS:293:465:309:2:42:1:29:0
Chr01	23818419	23823811	DUP00006413	5392	0.944915	0.0550847	0	0	PASS	PRECISE	DUP	60	-6,6	-6,6	GCCAACCACCACCACCCAAACGCCAGGTGCCACCCCGTAATCCACCGCCAGCAACCATAGGAGTCAATCGGGCCGAAACTTTCCTCACGATCGGCAACAGAGTCGCCCCTACCGGCTCTCCTTGAACAGATGAACCTATCTGACAAGCTCAAGGACGAGGCCAGGAAGCTCCTGAGCTCGAAGAACCTGCACTACGAGGAGATGTGCTCCTACCACA	0/1:-12.4878,0,-34.9836:125:PASS:200:627:209:3:16:7:12:5	0/1:-58.3053,0,-318.761:10000:PASS:1054:3272:1192:3:139:44:112:29	0/1:-67.4989,0,-235.896:10000:PASS:1038:3527:1232:3:99:46:84:31	0/1:-72.6233,0,-275.777:10000:PASS:976:3091:1163:3:131:54:98:33	0/1:-8.29228,0,-30.4904:83:PASS:218:830:284:3:25:6:11:4	0/1:-58.7002,0,-257.495:10000:PASS:784:2378:766:3:93:31:80:26	0/1:-72.0956,0,-262.089:10000:PASS:783:2324:843:3:87:32:82:29	0/1:-57.6323,0,-227.004:10000:PASS:1039:3250:1090:3:93:24:82:26	0/0:0,-26.3528,-280.362:10000:PASS:1050:2700:1014:3:126:0:88:0	0/0:0,-3.00746,-34.8972:30:PASS:172:545:177:3:18:0:10:0	0/1:-98.372,0,-374.882:10000:PASS:1267:4095:1419:3:151:68:129:46	0/1:-43.9674,0,-274.184:10000:PASS:1119:3825:1384:3:123:35:96:23	0/1:-90.5123,0,-342.047:10000:PASS:2143:6589:2269:3:245:91:117:39	0/1:-16.3044,0,-24.0872:10000:PASS:202:724:242:3:21:10:9:6	0/1:-61.2196,0,-245.003:10000:PASS:1062:3293:1197:3:108:49:84:29	0/0:0,-4.51242,-51.997:45:PASS:282:558:279:2:27:0:15:0	0/0:0,-5.41517,-62.2966:54:PASS:284:484:296:2:33:0:18:0	0/0:0,-14.438,-168.789:144:PASS:531:1400:752:2:82:0:48:0	0/0:0,-9.9232,-112.789:99:PASS:402:1109:403:3:39:0:33:0	0/0:0,-6.61863,-77.996:66:PASS:267:511:240:2:32:0:22:0	0/0:0,-31.8835,-366.374:10000:PASS:1108:2538:1166:2:121:0:106:0	0/0:0,-7.39875,-74.373:74:PASS:321:612:344:2:42:0:25:0	0/0:0,-17.707,-193.646:10000:PASS:635:1672:636:3:85:0:59:0	0/0:0,-6.91281,-79.0891:69:PASS:228:454:269:2:32:0:23:0	0/0:0,-16.2477,-193.492:10000:PASS:489:1627:536:3:69:0:54:0	0/0:0,-4.81209,-53.4956:48:PASS:213:472:214:2:28:0:16:0	0/0:0,-28.7574,-337.359:10000:PASS:1142:2398:1166:2:134:0:96:0	0/0:0,-17.4484,-203.089:10000:PASS:589:1472:661:2:86:0:58:0	0/0:0,-19.5464,-223.479:10000:PASS:575:1486:718:2:91:0:65:0	0/0:0,-6.01762,-71.997:60:PASS:253:556:280:2:36:0:20:0	0/0:0,-12.0316,-137.29:120:PASS:432:1202:409:3:53:0:40:0	0/0:0,-15.9473,-189.493:157:PASS:548:1397:692:2:88:0:53:0	0/0:0,-4.2099,-46.2955:42:PASS:300:530:280:2:34:0:14:0	0/0:0,-7.21874,-84.594:72:PASS:243:510:247:2:37:0:24:0
Chr01	23821169	23825564	INV00014866	4395	0.991525	0.00847458	0	0	PASS	PRECISE	INV	53	-8,8	-8,8	GGATTCGAGCTATGTCAGGCAGCTTGCTTAAGAGCACTGTTGTCTGCATAGCACATGCTAAGCACTCCTTTTCTTTAGTCCCTTGGGTCCCACAAAACTGTGCATGTGCTCACAGATGTAGTAGCCACGTAGATTATTCCTGGGTTCCTGTCTTAAGCACTTCTGTGGAGAAAAAAATAA	0/0:0,-2.40766,-30.6994:24:PASS:364:350:182:1:43:0:8:0	0/0:0,-21.0606,-248.988:10000:PASS:1375:2317:1078:2:177:0:70:0	0/0:0,-24.6714,-293.887:10000:PASS:1586:2411:1036:2:217:0:82:0	0/0:0,-21.6425,-246.268:10000:PASS:1384:2180:927:2:168:0:72:0	0/0:0,-3.61138,-45.199:36:PASS:416:516:222:2:61:1:12:0	0/0:0,-16.8508,-201.493:10000:PASS:1085:1563:747:2:89:0:56:0	0/0:0,-15.0454,-179.194:150:PASS:1048:1598:727:2:84:0:50:0	0/0:0,-19.5508,-225.284:10000:PASS:1470:2112:982:2:167:0:65:0	0/0:0,-18.647,-216.783:10000:PASS:1212:1796:984:2:114:0:62:0	0/0:0,-3.31056,-42.0992:33:PASS:306:298:175:1:29:0:11:0	0/0:0,-24.9682,-292.183:10000:PASS:1771:2860:1216:2:196:0:83:0	0/0:0,-26.9759,-317.383:10000:PASS:1821:2542:1116:2:214:2:90:0	0/0:0,-24.0711,-293.089:10000:PASS:3009:4411:1976:2:343:0:80:0	0/0:0,-1.80572,-23.0995:18:PASS:406:410:202:1:43:0:6:0	0/0:0,-22.2577,-257.182:10000:PASS:1602:2178:999:2:185:0:74:0	0/0:0,-2.40655,-27.6983:24:PASS:258:415:223:2:33:1:8:0	0/0:0,-3.90907,-44.9957:39:PASS:218:416:216:2:32:0:13:0	0/0:0,-6.31698,-73.6954:63:PASS:632:1115:577:2:100:1:21:0	0/0:0,-8.72628,-106.196:87:PASS:478:830:269:2:48:2:29:0	0/0:0,-2.10593,-24.6987:21:PASS:248:358:182:2:32:0:7:0	0/0:0,-12.9326,-151.688:129:PASS:1181:1931:730:2:154:2:43:0	0/0:0,-2.7083,-32.699:27:PASS:300:486:244:2:34:0:9:0	0/0:0,-9.61515,-113.782:96:PASS:812:1106:504:2:72:0:32:0	0/0:0,-2.10638,-25.2992:21:PASS:203:387:205:2:28:0:7:0	0/0:0,-9.32744,-112.096:93:PASS:915:887:545:1:70:1:31:0	0/0:0,-3.91066,-45.3973:39:PASS:203:345:164:2:27:0:13:0	0/0:0,-13.2398,-158.795:132:PASS:1125:1802:968:2:139:1:44:0	0/0:0,-7.22099,-84.9963:72:PASS:697:1058:529:2:78:0:24:0	0/0:0,-5.11528,-61.4978:51:PASS:669:1107:583:2:91:0:17:0	0/0:0,-3.30898,-38.6976:33:PASS:229:450:246:2:30:0:11:0	0/0:0,-8.42127,-97.3924:84:PASS:601:738:402:1:58:1:28:0	0/0:0,-6.91918,-80.6955:69:PASS:608:1075:567:2:92:0:23:0	0/0:0,-3.00501,-32.2947:30:PASS:240:435:221:2:28:0:10:0	0/0:0,-2.70799,-32.2987:27:PASS:238:372:213:2:30:0:9:0
Chr01	27510726	27511423	DUP00006830	697	0.995763	0.00423729	0	0	PASS	PRECISE	DUP	60	-5,5	-5,5	TCAGTATACTACCCTGTGTGCACAAAAGATACTCATGAGTAATTGAATCCATATAATCAGGGTTTAACACTCCCATAAAATAGAC	0/0:0,-2.40749,-29.8993:24:PASS:11:22:16:2:14:0:8:0	0/0:0,-11.7308,-138.091:117:PASS:57:110:62:2:67:0:39:0	0/0:0,-13.7145,-160.167:137:PASS:50:150:66:3:77:0:46:0	0/0:0,-10.8309,-129.094:108:PASS:57:109:44:2:54:0:36:0	0/0:0,-2.40779,-31.1995:24:PASS:22:43:22:2:19:0:8:0	0/0:0,-8.72638,-103.797:87:PASS:46:83:46:2:34:0:29:0	0/0:0,-11.1337,-132.396:111:PASS:47:104:46:2:36:0:37:0	0/0:0,-11.132,-132.994:111:PASS:45:105:72:2:63:0:37:0	0/0:0,-14.4431,-174.694:144:PASS:69:139:75:2:72:0:48:0	0/0:0,-1.50484,-19.3997:15:PASS:10:27:20:2:16:0:5:0	0/0:0,-17.7478,-213.087:10000:PASS:80:178:65:2:81:0:59:0	0/0:0,-17.1498,-203.291:10000:PASS:81:151:71:2:77:0:57:0	0/0:0,-15.047,-189.195:150:PASS:111:236:110:2:112:0:50:0	0/0:0,-1.50485,-19.2997:15:PASS:14:30:20:2:16:0:5:0	0/0:0,-12.2409,-145.799:122:PASS:58:118:73:2:68:0:41:0	0/0:0,-8.11831,-91.9905:81:PASS:34:78:43:2:44:0:27:0	0/0:0,-8.12096,-94.2932:81:PASS:38:75:32:2:41:0:27:0	0/0:0,-6.90165,-77.178:69:PASS:35:67:40:2:39:0:23:0	0/0:0,-12.0358,-144.595:120:PASS:56:125:72:2:58:0:40:0	0/0:0,-3.82287,-82.9972:38:PASS:36:76:31:2:37:2:24:1	0/0:0,-15.3428,-180.09:154:PASS:64:131:73:2:70:0:51:0	0/0:0,-10.2212,-114.586:102:PASS:52:103:52:2:58:0:34:0	0/0:0,-5.41649,-66.798:54:PASS:42:63:28:2:24:0:18:0	0/0:0,-5.71411,-65.5945:57:PASS:28:68:32:2:41:0:19:0	0/0:0,-6.62063,-81.598:66:PASS:30:87:42:2:42:0:22:0	0/0:0,-5.10361,-58.5861:51:PASS:34:47:28:2:27:0:17:0	0/0:0,-18.3497,-215.687:10000:PASS:88:165:76:2:92:0:61:0	0/0:0,-6.92045,-81.9968:69:PASS:36:75:34:2:38:0:23:0	0/0:0,-9.62864,-114.496:96:PASS:28:81:46:2:43:0:32:0	0/0:0,-8.42419,-99.1954:84:PASS:34:76:41:2:47:0:28:0	0/0:0,-7.82299,-92.5962:78:PASS:41:68:41:2:36:0:26:0	0/0:0,-7.82406,-94.9973:78:PASS:29:68:38:2:42:0:26:0	0/0:0,-6.91735,-78.9937:69:PASS:30:74:40:2:45:0:23:0	0/0:0,-6.31961,-77.298:63:PASS:22:75:40:2:38:0:21:0
Chr01	28095778	28153209	INV00016378	57431	0.974576	0.0254237	0	0	PASS	PRECISE	INV	60	-5,5	-5,5	GGTATCTTACATGCATGCTTACAAAGTAATCTACATAATCCATCCTCTGTTTCATCATTCTAATTCCTATAAATATATGCTTCTCTCAAAATTTTGCATTGACCTGTGGAACATATGTGCTGCTGCTGCAAAATAGTAGGAGTACTGTACAAAGGTTTTAGAAGACCCTGGCTAAGTACGGCAGCTTAGGAGTTGTAATGTCCAT	0/0:0,-2.10651,-26.0993:21:PASS:724:1192:762:2:14:0:7:0	0/0:0,-9.3272,-112.595:93:PASS:3510:7112:4177:2:61:0:31:0	0/0:0,-9.62032,-106.887:96:PASS:3425:7020:4283:2:52:0:32:0	0/0:0,-10.1942,-119.859:102:PASS:3200:6078:3699:2:45:0:34:0	0/0:0,-2.10683,-27.3996:21:PASS:1042:1725:1031:2:14:0:7:0	0/0:0,-8.12489,-97.4971:81:PASS:2672:5655:3061:2:35:0:27:0	0/0:0,-9.32705,-109.295:93:PASS:2728:5797:3229:2:39:0:31:0	0/0:0,-13.2379,-157.093:132:PASS:3329:6607:4068:2:65:0:44:0	0/0:0,-15.9355,-185.481:157:PASS:4202:8824:4634:2:58:0:53:0	0/0:0,-2.10678,-27.1996:21:PASS:925:1651:978:2:11:0:7:0	0/0:0,-12.9345,-151.49:129:PASS:4182:8843:5065:2:61:0:43:0	0/0:0,-15.3338,-177.081:154:PASS:4261:8273:4822:2:66:1:51:0	0/0:0,-14.7203,-179.67:147:PASS:7411:15566:9130:2:113:0:49:0	0/0:0,-2.40654,-28.2983:24:PASS:904:1515:904:2:15:0:8:0	0/0:0,-10.8313,-129.094:108:PASS:3802:7259:4287:2:60:0:36:0	0/0:0,-6.0147,-66.4941:60:PASS:2408:4418:2707:2:32:0:20:0	0/0:0,-5.70834,-64.8888:57:PASS:2132:4572:2623:2:32:0:19:0	0/0:0,-4.51342,-53.498:45:PASS:2192:4303:2312:2:22:0:15:0	0/0:0,-13.2396,-158.994:132:PASS:3659:8065:3985:2:49:0:44:0	0/0:0,-9.02658,-107.796:90:PASS:2248:4782:2778:2:38:0:30:0	0/0:0,-9.92827,-116.894:99:PASS:3508:7673:3807:2:41:0:33:0	0/0:0,-7.81652,-87.2897:78:PASS:2976:5531:3124:2:46:0:26:0	0/1:-79.0651,0,-26.0727:10000:PASS:2283:5678:2648:2:19:30:10:25	0/0:0,-6.61745,-76.4948:66:PASS:2238:4221:2298:2:38:0:22:0	0/0:0,-8.72314,-103.793:87:PASS:2474:4864:2537:2:34:0:29:0	0/0:0,-5.10982,-55.6923:51:PASS:1951:3756:2285:2:29:0:17:0	0/0:0,-16.8494,-200.892:10000:PASS:6128:11931:6532:2:89:0:56:0	0/0:0,-6.31867,-74.597:63:PASS:2318:4535:2444:2:32:0:21:0	0/0:0,-5.41157,-61.993:54:PASS:2188:4379:2457:2:31:0:18:0	0/0:0,-6.61833,-76.9957:66:PASS:2298:4669:2769:2:31:0:22:0	0/0:0,-6.31611,-73.2945:63:PASS:1983:3808:1994:2:29:0:21:0	0/0:0,-5.71715,-68.1976:57:PASS:2237:4528:2517:2:39:0:19:0	0/0:0,-7.82202,-92.2952:78:PASS:2540:5078:2731:2:42:0:26:0	0/0:0,-8.42536,-100.897:84:PASS:2077:4005:2485:2:33:0:28:0
Chr01	30117915	30118131	DUP00007135	216	0.95339	0.0466102	0	0	PASS	PRECISE	DUP	60	-2,2	-2,2	CTACTGATCACTCAAATAATCCATTCACTAATAAGGTTCAAAGGTCTATTATTATTTCTAAAGCACCCAATTATAATCACCCAAGTACCTTTGCAAGCTTTGCTGGGCTGCCTTGTCCAAACAATTAACATAACATGTAACCGAAATTTGAATCATTTATTGAAGACAACCCCAAAACATCACTTATTTGTGACCGGATGAAGTAATATATTTA	0/0:0,-2.40756,-30.3993:24:PASS:957:1767:876:2:17:0:8:0	0/0:0,-12.3363,-148.094:123:PASS:5205:10335:4806:2:59:0:41:0	0/0:0,-13.239,-161.594:132:PASS:6821:11862:4706:2:75:0:44:0	0/0:0,-9.00784,-104.177:90:PASS:4181:9359:5312:2:57:0:30:0	0/0:0,-3.91238,-49.699:39:PASS:1988:3876:1314:2:30:0:13:0	0/0:0,-7.52233,-88.5966:75:PASS:3770:7281:3427:2:31:0:25:0	0/0:0,-9.32668,-108.995:93:PASS:4237:6820:3792:2:32:0:31:0	0/0:0,-11.4344,-138.795:114:PASS:5114:10475:6595:2:58:0:38:0	0/0:0,-15.6435,-185.29:157:PASS:6725:13867:7605:2:72:0:52:0	0/0:0,-2.40751,-29.6993:24:PASS:1183:2242:989:2:22:0:8:0	0/0:0,-16.2467,-193.491:10000:PASS:7366:14791:6645:2:77:0:54:0	0/0:0,-18.9559,-226.391:10000:PASS:7732:15979:8100:2:91:0:63:0	0/0:0,-15.647,-193.193:157:PASS:7787:14999:8695:2:128:0:52:0	0/0:0,-2.7082,-33.4989:27:PASS:1092:2350:1201:2:23:0:9:0	0/0:0,-14.7445,-179.994:147:PASS:7337:13094:6271:2:67:0:49:0	0/0:0,-9.61735,-111.384:96:PASS:4542:8944:4704:2:57:0:32:0	0/0:0,-7.52188,-88.5961:75:PASS:3170:6227:3119:2:37:0:25:0	0/0:0,-9.32386,-108.292:93:PASS:3530:7488:4115:2:45:0:31:0	0/0:0,-19.2537,-228.988:10000:PASS:7767:16310:8677:2:83:0:64:0	0/0:0,-9.93035,-119.796:99:PASS:4144:7826:4305:2:48:0:33:0	0/0:0,-13.5388,-160.492:135:PASS:5974:10430:5752:2:60:0:45:0	0/0:0,-10.2244,-117.189:102:PASS:5057:7617:4905:2:55:0:34:0	0/0:0,-10.5322,-128.196:105:PASS:3978:9151:5607:2:52:0:35:0	0/0:0,-7.51197,-84.7862:75:PASS:4151:7323:2546:2:35:0:25:0	0/0:0,-8.12415,-97.7963:81:PASS:4805:7999:3137:2:42:0:27:0	0/0:0,-8.12083,-93.093:81:PASS:3728:7368:2925:2:46:0:27:0	0/0:0,-17.7302,-202.669:10000:PASS:8509:15711:8513:2:90:0:59:0	0/0:0,-8.12348,-95.8957:81:PASS:4033:5368:3536:1:42:0:27:0	0/0:0,-9.32768,-111.696:93:PASS:4130:6910:3477:2:45:0:31:0	0/0:0,-11.4329,-135.694:114:PASS:4107:8873:4793:2:58:0:38:0	0/0:0,-7.82301,-93.2962:78:PASS:3558:7310:3257:2:53:0:26:0	0/0:0,-8.42383,-98.395:84:PASS:3619:8162:3356:2:45:0:28:0	0/0:0,-9.92732,-116.093:99:PASS:4629:7650:3330:2:50:0:33:0	0/1:-43.4628,0,-72.6645:10000:PASS:2934:10174:2929:3:25:0:24:17
Chr01	30405644	30406245	DUP00007167	601	0.95339	0	0.0466102	0	PASS	PRECISE	DUP	36	-3,3	-3,3	AACTTTACATTGTTATGATACTGGGGGATTAGGAGTTGGAAACTTCTATGGAAGCCAGTCTTGCGACCAACTCCAACCACAATAGCAAAACACCCAATCATATGTTTCAATTCTCCAAACTGGTGCACATCAATATCGATGTAGTATACAT	0/0:0,-2.96435,-32.4541:30:PASS:14:61:35:2:28:2:10:0	0/0:0,-12.2836,-129.541:123:PASS:48:190:141:2:88:18:41:0	0/0:0,-16.0508,-174.494:10000:PASS:45:243:157:2:103:18:55:0	0/0:0,-10.2145,-114.28:102:PASS:38:228:146:2:85:22:34:0	0/0:0,-2.70276,-31.2935:27:PASS:14:79:61:2:43:1:9:0	0/0:0,-7.08898,-72.6643:71:PASS:39:150:106:2:49:6:24:0	0/0:0,-7.11907,-76.9943:71:PASS:26:176:111:3:52:11:24:0	0/0:0,-9.60699,-110.474:96:PASS:40:189:154:2:79:17:32:0	0/0:0,-18.3251,-207.962:10000:PASS:53:143:75:2:77:7:61:0	0/0:0,-2.70695,-33.0977:27:PASS:16:35:21:2:20:0:9:0	0/0:0,-11.9708,-127.729:120:PASS:41:257:170:2:99:21:41:0	0/0:0,-16.0861,-178.53:10000:PASS:66:281:205:2:109:32:54:0	0/0:0,-12.2438,-137.601:122:PASS:102:372:347:2:201:12:42:0	0/0:0,-1.49932,-16.8942:15:PASS:9:55:55:2:27:1:5:0	0/0:0,-12.1544,-138.112:122:PASS:51:263:178:2:106:26:41:0	0/0:0,-13.944,-155.896:139:PASS:23:134:88:2:66:6:47:0	0/0:0,-7.22178,-86.5971:72:PASS:20:72:34:3:42:0:24:0	0/0:0,-8.72416,-88.0933:87:PASS:15:62:38:2:29:13:30:0	0/0:0,-16.101,-185.045:10000:PASS:38:129:73:2:45:3:54:0	0/0:0,-7.6604,-84.5336:77:PASS:28:113:51:3:40:7:26:0	0/0:0,-11.8672,-132.326:119:PASS:11:66:51:2:34:10:40:0	0/0:0,-10.5253,-120.189:105:PASS:33:74:46:2:61:0:35:0	0/0:0,-9.00091,-100.97:90:PASS:23:125:73:3:50:6:30:0	0/0:0,-7.88652,-77.4587:79:PASS:6:50:42:2:27:10:27:0	0/0:0,-8.72454,-104.295:87:PASS:21:67:44:2:34:10:29:0	0/0:0,-6.31663,-72.495:63:PASS:33:63:17:3:37:0:21:0	0/0:0,-24.4571,-259.372:10000:PASS:18:148:120:2:71:39:83:0	0/0:0,-7.45788,-79.4311:75:PASS:5:57:44:2:27:16:26:0	0/0:0,-8.70411,-98.1742:87:PASS:7:71:37:3:28:15:29:0	0/0:0,-12.5746,-136.831:126:PASS:32:125:68:3:59:1:42:0	1/1:-38.2525,-4.06692,0:41:PASS:18:96:55:3:31:5:0:14	0/0:0,-9.62602,-113.393:96:PASS:21:64:35:2:46:0:32:0	0/0:0,-6.61953,-79.1969:66:PASS:34:70:50:2:52:0:22:0	0/0:0,-4.20691,-32.1915:42:PASS:19:39:17:2:11:0:15:0
Chr01	31884937	31895490	DEL00013300	10553	0.983051	0.0169492	0	0	PASS	PRECISE	DEL	60	-3,3	-3,3	TAGAGGACGAGATTTTTTGGCGATGGACAAGAGACGGGGAATATACGATAAAGAGTGCTTATCGTATCCAATTCCAAGGTCGCATGAAAAAGTGGAGTATTACATAGAATACGAATAAATTATAAAGCACAAAGATAATCGATTTTAATTAACTTGCAATCTAAATTTATCCACGAAAACAGTTGCAGCAAAACTCTTTTCAACTGCCAC	0/0:0,-2.70868,-34.5994:27:PASS:89:313:113:3:12:0:9:0	0/0:0,-10.8315,-128.894:108:PASS:554:1530:606:3:55:0:36:0	0/0:0,-14.1348,-170.386:141:PASS:603:1584:633:3:68:0:47:0	0/0:0,-11.7342,-139.194:117:PASS:504:1342:625:2:53:0:39:0	0/0:0,-2.70855,-34.0993:27:PASS:134:435:172:3:18:0:9:0	0/0:0,-8.12462,-96.7968:81:PASS:424:1159:445:3:31:0:27:0	0/0:0,-9.02767,-108.697:90:PASS:408:1169:427:3:34:0:30:0	0/0:0,-10.8323,-130.495:108:PASS:587:1482:569:3:51:0:36:0	0/1:-66.7462,0,-104.444:10000:PASS:777:1655:772:2:42:18:34:24	0/1:-10.2949,0,-6.495:65:PASS:123:368:138:3:9:2:2:3	0/0:0,-13.54,-162.694:135:PASS:700:1809:730:3:59:0:45:0	0/0:0,-11.7321,-141.292:117:PASS:630:1837:720:3:62:0:39:0	0/0:0,-16.5406,-204.684:10000:PASS:1133:3140:1209:3:95:0:55:0	0/0:0,-2.10685,-27.4996:21:PASS:124:363:138:3:10:0:7:0	0/0:0,-13.2322,-154.887:132:PASS:534:1728:639:3:57:0:44:0	0/0:0,-6.92058,-82.2969:69:PASS:339:1101:356:3:31:0:23:0	0/0:0,-6.31652,-72.8949:63:PASS:418:956:382:2:35:1:21:0	0/0:0,-7.80561,-90.4788:78:PASS:79:833:403:3:25:6:26:0	0/0:0,-12.6367,-151.193:126:PASS:146:1485:576:4:44:0:42:0	0/0:0,-4.51352,-53.9981:45:PASS:116:943:354:4:28:4:15:0	0/0:0,-13.5381,-157.492:135:PASS:112:1477:570:4:52:11:45:0	0/0:0,-7.51811,-86.1924:75:PASS:481:1202:480:3:46:0:25:0	0/0:0,-9.62486,-115.792:96:PASS:90:1117:378:5:40:4:32:0	0/0:0,-6.92049,-82.0968:69:PASS:72:766:333:4:34:8:23:0	0/0:0,-7.17747,-80.1527:72:PASS:230:1059:434:3:33:2:24:0	0/0:0,-6.01521,-70.0946:60:PASS:330:773:333:2:37:0:20:0	0/0:0,-18.0545,-217.293:10000:PASS:204:2120:1007:4:78:7:60:0	0/0:0,-8.72516,-104.195:87:PASS:88:913:399:4:35:3:29:0	0/0:0,-8.42418,-100.295:84:PASS:78:866:401:4:34:4:28:0	0/0:0,-7.82295,-93.2962:78:PASS:435:1016:442:2:38:0:26:0	0/0:0,-5.71744,-68.9979:57:PASS:292:835:261:3:32:0:19:0	0/0:0,-6.01771,-71.4971:60:PASS:339:926:347:3:37:0:20:0	0/0:0,-6.91888,-81.1952:69:PASS:420:1070:385:3:38:0:23:0	0/0:0,-8.42202,-98.4932:84:PASS:72:864:392:4:28:4:28:0
Chr01	33067142	33130256	DEL00013612	63114	0.995763	0.00423729	0	0	PASS	PRECISE	DEL	60	-2,2	-2,2	TACTCTGACTAGCAATATCTTTATGGAGAATTATATCCACACGAAAAAATATTGGACTTGCCTAAAGAAATACTAACACAATAATACGCACAGTCAAAAGCTCCTTTCAGGTCCGATTTGAGCCGGTGCTAGAAATGTAGTAAAGGATGAATTGGTCAAGTCAAGGTGCGGAGT	0/0:0,-2.70882,-35.4995:27:PASS:443:1452:840:2:13:0:9:0	0/0:0,-12.3319,-144.59:123:PASS:2623:8065:4339:2:56:0:41:0	0/0:0,-14.1373,-164.289:141:PASS:2391:8118:4399:2:79:0:47:0	0/0:0,-10.829,-126.892:108:PASS:2207:6952:4325:2:59:0:36:0	0/0:0,-2.10669,-26.5995:21:PASS:715:1967:1151:2:20:0:7:0	0/0:0,-5.71724,-67.8977:57:PASS:1931:6275:3579:2:22:1:19:0	0/0:0,-7.82394,-93.8972:78:PASS:1929:6207:3563:2:28:2:26:0	0/0:0,-11.4296,-134.89:114:PASS:2313:7656:4144:2:51:0:38:0	0/0:0,-16.2405,-188.185:10000:PASS:3323:9018:5342:2:73:0:54:0	0/0:0,-3.31067,-42.7993:33:PASS:697:1745:953:2:19:0:11:0	0/0:0,-12.6363,-149.093:126:PASS:3239:9743:5175:2:66:0:42:0	0/0:0,-14.1407,-167.492:141:PASS:2871:9001:5122:2:74:1:47:0	0/0:0,-15.6386,-186.185:157:PASS:6572:16770:9161:2:123:0:52:0	0/0:0,-2.40777,-31.0995:24:PASS:593:1679:881:2:16:0:8:0	0/0:0,-14.4306,-170.381:144:PASS:2565:7892:4450:2:64:0:48:0	0/0:0,-9.9256,-117.592:99:PASS:1817:4825:2780:2:42:0:33:0	0/0:0,-7.82229,-92.2955:78:PASS:1972:5073:2938:2:45:0:26:0	0/0:0,-4.21277,-51.1983:42:PASS:1630:4180:2532:2:27:0:14:0	0/0:0,-13.2415,-163.396:132:PASS:3197:7484:3898:2:48:0:44:0	0/0:0,-3.91195,-47.3986:39:PASS:1776:4668:2744:2:26:1:13:0	0/0:0,-6.61929,-78.2966:66:PASS:2470:6478:3950:2:43:3:22:0	0/0:0,-12.3267,-141.384:123:PASS:2330:6148:3570:2:55:0:41:0	0/0:0,-3.61143,-45.9991:36:PASS:1976:5134:2984:2:31:2:12:0	0/0:0,-4.81497,-58.7985:48:PASS:1771:4553:2547:2:37:0:16:0	0/0:0,-5.41705,-66.9985:54:PASS:2016:4665:2874:2:33:4:18:0	0/0:0,-5.11395,-59.2964:51:PASS:1573:3832:2291:2:36:0:17:0	0/0:0,-11.4303,-137.491:114:PASS:4343:11281:6507:2:68:2:38:0	0/0:0,-3.60986,-41.7975:36:PASS:1753:4516:2730:2:28:1:12:0	0/0:0,-4.21319,-51.7988:42:PASS:1829:4504:2680:2:27:3:14:0	0/0:0,-8.72418,-103.994:87:PASS:2091:5382:3066:2:54:0:29:0	0/0:0,-4.21092,-49.0965:42:PASS:1299:3821:2068:2:27:2:14:0	0/0:0,-8.72536,-103.595:87:PASS:1904:4591:2713:2:45:0:29:0	0/0:0,-7.52169,-87.8959:75:PASS:1960:4947:2872:2:57:0:25:0	0/0:0,-7.52318,-91.6974:75:PASS:1836:4480:2613:2:42:0:25:0
Chr01	33474062	33474347	DUP00007500	285	0.644068	0.355932	0	0	PASS	PRECISE	DUP	60	-4,4	-4,4	TGATTCAACAACTGCAATGAATTTTCCATTTGTATTTGTGGGGTTCCAATAGCTCCCCCAAATCTGTAGTTTTGGAAACCTACAAAGTATTTGAATAAGTCTGAGCTTTGTGTATTTGAGACTTATATTCTTTTTTGTCAATTCTCCTATTGTATCCATGTCATAGGAGTATGATTAAAAGCTGACTGGCTGCTTATTTTTTATAGGAGTATGA	0/1:-20.9898,0,-8.89297:89:PASS:1318:4130:1457:3:17:0:3:7	0/1:-103.727,0,-119.744:10000:PASS:6390:26680:6108:4:43:0:40:37	0/1:-140.404,0,-148.52:10000:PASS:11345:32594:8127:3:65:0:49:50	0/1:-103.529,0,-112.837:10000:PASS:7428:24677:6117:4:47:3:38:37	0/1:-37.5838,0,-14.5843:146:PASS:1475:5665:1021:5:19:0:5:11	0/1:-72.8497,0,-81.0499:10000:PASS:4998:19361:4888:4:26:8:27:25	0/1:-57.75,0,-95.7496:10000:PASS:5262:17015:4205:4:28:6:31:21	0/1:-111.72,0,-141.933:10000:PASS:9185:33193:7560:4:54:3:46:40	0/1:-142.607,0,-134.531:10000:PASS:7240:33321:7200:5:48:6:46:51	0/1:-19.0842,0,-33.7838:10000:PASS:1768:8392:1662:5:22:0:10:6	0/1:-153.846,0,-141.843:10000:PASS:11827:33274:9825:3:59:0:50:55	0/1:-152.807,0,-143.814:10000:PASS:8745:35874:8470:4:60:2:49:53	0/1:-194.691,0,-147.629:10000:PASS:10844:43324:11110:4:115:1:48:62	0/1:-27.7831,0,-25.4837:10000:PASS:1684:5709:1513:4:16:1:8:9	0/1:-116.018,0,-153.821:10000:PASS:8120:33068:7046:4:53:1:51:41	0/0:0,-6.91831,-79.2946:69:PASS:4634:8955:5583:2:50:0:23:0	0/0:0,-6.0177,-71.3971:60:PASS:4256:8141:4163:2:42:0:20:0	0/0:0,-7.52253,-89.7968:75:PASS:4067:7450:4376:2:36:0:25:0	0/1:-107.824,0,-128.823:10000:PASS:7443:25437:6539:4:43:6:43:37	0/1:-68.3512,0,-73.662:10000:PASS:4989:15341:4814:3:32:1:25:26	0/1:-90.4345,0,-106.84:10000:PASS:6442:22168:6510:3:42:0:35:33	0/0:0,-10.8175,-114.78:108:PASS:6202:11267:5954:2:59:0:36:0	0/1:-58.8455,0,-112.155:10000:PASS:4921:18027:6068:3:35:0:35:22	0/0:0,-6.61791,-76.5952:66:PASS:4336:8151:4340:2:35:0:22:0	0/0:0,-8.42541,-101.597:84:PASS:4733:10362:4978:2:46:0:28:0	0/0:0,-4.81383,-56.5974:48:PASS:3663:5837:3209:2:24:0:16:0	0/0:0,-17.7532,-213.692:10000:PASS:10773:21442:11349:2:103:0:59:0	0/0:0,-7.21918,-83.4945:72:PASS:3801:8212:4158:2:37:0:24:0	0/0:0,-8.42312,-98.8943:84:PASS:4677:9745:5403:2:45:0:28:0	0/0:0,-9.62576,-114.193:96:PASS:5570:12702:6229:2:67:0:32:0	0/0:0,-6.1524,-71.1308:62:PASS:4626:7921:5208:2:40:0:21:0	0/0:0,-9.02797,-110.397:90:PASS:4672:9543:5686:2:45:0:30:0	0/0:0,-6.91807,-80.8944:69:PASS:5283:9561:4728:2:42:0:23:0	0/0:0,-6.3174,-74.4958:63:PASS:4087:7925:4472:2:36:0:21:0
Chr01	34886794	34928118	DEL00014098	41324	0.995763	0.00423729	0	0	PASS	PRECISE	DEL	60	-3,3	-3,3	CTGTCATTGTGGGATAAATATTCACTTGTTCAGGTTACATATTTCAATATGCCAGTCAATCAACTTAACTACTTAAGCAAATACGAAGACATAATATGATTATTATGGATCAAAGAAACATCAAAGTCAAGTGACAAATTTCAAATTTGCATTCTACCCTAGAATCTTCCAAGCACTTGATTTTTCCTAGAGTCTTCATCCCAGCTGTCAGAT	0/0:0,-2.70829,-34.199:27:PASS:492:921:555:2:18:0:9:0	0/0:0,-10.8304,-129.293:108:PASS:2969:5535:3399:2:55:0:36:0	0/0:0,-13.8422,-169.295:138:PASS:2935:5374:3253:2:70:1:46:0	0/0:0,-10.8332,-134.196:108:PASS:2523:4728:2480:2:53:0:36:0	0/0:0,-2.40783,-31.4996:24:PASS:728:1463:810:2:26:0:8:0	0/0:0,-8.12504,-98.0972:81:PASS:2232:4374:2571:2:31:1:27:0	0/0:0,-7.22171,-85.897:72:PASS:2168:4437:2593:2:31:0:24:0	0/0:0,-13.8429,-171.196:138:PASS:2839:5275:2978:2:62:0:46:0	0/0:0,-12.6302,-152.387:126:PASS:3157:6495:3518:2:62:2:42:0	0/0:0,-2.40777,-31.0995:24:PASS:608:1259:733:2:18:0:8:0	0/0:0,-12.9389,-160.095:129:PASS:3669:6871:4136:2:65:0:43:0	0/0:0,-19.5208,-234.454:10000:PASS:3318:6476:3675:2:92:0:65:0	0/0:0,-20.1631,-255.294:10000:PASS:6557:12753:7024:2:133:0:67:0	0/0:0,-1.5047,-19.1996:15:PASS:638:1118:660:2:19:0:5:0	0/0:0,-13.8416,-170.194:138:PASS:3083:5579:3248:2:72:0:46:0	0/0:0,-8.42536,-100.497:84:PASS:1949:3963:2028:2:54:0:28:0	0/0:0,-8.42442,-101.196:84:PASS:1892:3764:1956:2:42:0:28:0	0/0:0,-8.12419,-97.1964:81:PASS:1663:3500:1726:2:49:0:27:0	0/0:0,-15.3473,-186.895:154:PASS:3327:6161:3571:2:58:0:51:0	0/0:0,-8.72432,-104.694:87:PASS:1995:3900:1933:2:44:0:29:0	0/0:0,-12.6369,-149.794:126:PASS:2848:5976:3537:2:65:0:42:0	0/0:0,-10.5264,-119.79:105:PASS:2251:4606:2411:2:58:0:35:0	0/0:0,-8.12506,-100.297:81:PASS:2403:5028:2690:2:47:0:27:0	0/0:0,-5.1133,-61.0958:51:PASS:1625:3324:1781:2:26:0:17:0	0/0:0,-10.8322,-131.695:108:PASS:1936:3807:2029:2:56:0:36:0	0/0:0,-5.40981,-60.9913:54:PASS:1558:3148:1651:2:39:0:18:0	0/0:0,-19.5604,-237.593:10000:PASS:4521:9112:4650:2:95:0:65:0	0/0:0,-8.72334,-102.893:87:PASS:1777:3559:1948:2:49:0:29:0	0/0:0,-9.32582,-110.894:93:PASS:1773:3599:1857:2:45:0:31:0	0/0:0,-10.2273,-120.492:102:PASS:2026:3878:2101:2:51:0:34:0	0/0:0,-5.71426,-68.2947:57:PASS:1490:3005:1669:2:29:0:19:0	0/0:0,-6.61815,-77.2955:66:PASS:1762:3532:1872:2:43:0:22:0	0/0:0,-7.82401,-95.2972:78:PASS:2026:3900:2049:2:51:0:26:0	0/0:0,-6.92095,-83.5973:69:PASS:1693:3559:1818:2:38:0:23:0
Chr01	36725120	36725603	DUP00007667	483	0.995763	0.00423729	0	0	PASS	PRECISE	DUP	60	-3,3	-3,3	TGAGCTTGCCATGAAACACCTGAATGGTTGAATGCATATATATGGTTCCCCTCGTGTAAAAACTAAAACATCTATGAGCATTTGAAACGTATACCTGAATGGAAATCAGTGAGCTGATGTTTATTTCAAAACTTTGCATTTCTGCAGCATTGGAAGCAGCCTCTACAATTGTGGGACCAAGAATAGGCACCTCAAA	0/0:0,-3.9127,-50.9993:39:PASS:2642:5491:2518:2:23:0:13:0	0/0:0,-12.0355,-143.994:120:PASS:11101:24981:11966:2:59:0:40:0	0/0:0,-16.2414,-189.686:10000:PASS:14610:31000:10276:2:75:0:54:0	0/0:0,-10.5285,-119.692:105:PASS:9960:20968:8975:2:52:0:35:0	0/0:0,-3.00934,-37.699:30:PASS:3093:7164:2604:3:24:0:10:0	0/0:0,-10.833,-129.496:108:PASS:11179:21432:12883:2:47:0:36:0	0/0:0,-10.5323,-126.596:105:PASS:8357:17311:10469:2:39:0:35:0	0/0:0,-12.3344,-147.092:123:PASS:13265:27752:8824:3:60:0:41:0	0/0:0,-17.4487,-206.189:10000:PASS:12300:30058:14603:2:70:0:58:0	0/0:0,-2.10683,-27.4996:21:PASS:2069:5432:1996:3:15:0:7:0	0/0:0,-12.3331,-145.391:123:PASS:13963:27765:12120:2:64:0:41:0	0/0:0,-14.7446,-179.194:147:PASS:16758:31932:12821:2:79:0:49:0	0/0:0,-13.232,-163.787:132:PASS:16000:33973:16362:2:120:0:44:0	0/0:0,-1.80587,-23.5997:18:PASS:2007:4606:2202:2:22:0:6:0	0/0:0,-12.3354,-145.193:123:PASS:13597:25885:12199:2:63:0:41:0	0/0:0,-10.2243,-115.389:102:PASS:9245:18585:7031:2:52:0:34:0	0/0:0,-6.61893,-78.5963:66:PASS:8067:15879:6886:2:42:0:22:0	0/0:0,-7.82236,-91.5956:78:PASS:7318:12276:6488:2:14:0:26:0	0/0:0,-11.4345,-137.595:114:PASS:20736:20985:10709:1:41:0:38:0	0/0:0,-6.91888,-79.7952:69:PASS:9137:15016:6461:2:41:1:23:0	0/0:0,-8.42309,-99.9942:84:PASS:10063:22258:10989:2:24:0:28:0	0/0:0,-10.8312,-127.594:108:PASS:8901:17799:8284:2:53:0:36:0	0/0:0,-8.72373,-105.094:87:PASS:6676:15883:9333:2:20:0:29:0	0/0:0,-6.31935,-76.1977:63:PASS:6493:12005:6488:2:37:0:21:0	0/0:0,-10.2282,-120.993:102:PASS:9622:16889:6962:2:40:0:34:0	0/0:0,-6.31486,-69.8932:63:PASS:5724:13148:5136:2:33:0:21:0	0/0:0,-18.9545,-224.79:10000:PASS:18651:38511:17907:2:88:0:63:0	0/0:0,-10.5315,-124.895:105:PASS:7511:15051:6141:2:37:0:35:0	0/0:0,-6.31743,-75.4958:63:PASS:7340:13437:8604:2:34:0:21:0	0/0:0,-11.1335,-132.895:111:PASS:9632:17902:8032:2:51:0:37:0	0/0:0,-8.11899,-95.6912:81:PASS:7689:15053:5328:2:38:0:27:0	0/0:0,-7.82367,-93.6969:78:PASS:7494:12697:7710:2:38:0:26:0	0/1:-57.9552,0,-78.9564:10000:PASS:7449:25107:6897:4:34:13:26:21	0/0:0,-6.62036,-80.5977:66:PASS:6517:13167:7606:2:31:0:22:0
Chr01	38159444	38189316	DUP00007751	29872	0.978814	0.0211864	0	0	PASS	PRECISE	DUP	60	-2,2	-2,2	GTTATGCCATAGGATTTGGGAGTTGGAGTGGGGATGCAGTTCAATTGAACACCCATGCCCAGCTTTAAGTCCATCCCAACTGTATCAATTGAACTCCTATAGCCAACTCCAGTAATGTGAGTGTTCCGTATCCCATTGTAGCAGCTGCTCTTCATACAGTGGCACAAGTTGTTTCACCAAAATCAGGTGCTCTACAGAAATATCTAGTC	0/0:0,-1.80581,-23.2996:18:PASS:356:840:378:2:11:0:6:0	0/0:0,-10.2004,-117.565:102:PASS:1879:4505:2214:2:51:0:34:0	0/0:0,-13.8397,-164.292:138:PASS:1913:4582:2212:2:60:0:46:0	0/0:0,-10.8277,-126.591:108:PASS:1694:4123:1928:2:48:0:36:0	0/0:0,-1.50483,-19.1997:15:PASS:524:1107:579:2:20:0:5:0	0/0:0,-10.2304,-121.995:102:PASS:1532:3481:1738:2:32:0:34:0	0/0:0,-10.2308,-121.296:102:PASS:1510:3538:1772:2:29:0:34:0	0/0:0,-12.9379,-153.094:129:PASS:1718:4334:2119:2:53:0:43:0	0/0:0,-12.6361,-148.093:126:PASS:2467:5269:2774:2:68:0:42:0	0/0:0,-2.40741,-29.2992:24:PASS:516:1028:557:2:19:0:8:0	0/0:0,-13.8385,-160.391:138:PASS:2339:5663:2835:2:58:0:46:0	0/0:0,-14.4363,-163.687:144:PASS:2219:5211:2592:2:62:0:48:0	0/0:0,-12.0376,-150.996:120:PASS:4441:9576:5046:2:98:0:40:0	0/0:0,-1.80576,-23.0996:18:PASS:387:979:486:2:12:0:6:0	0/0:0,-12.3207,-140.279:123:PASS:2081:4722:2283:2:51:0:41:0	0/0:0,-6.91503,-78.0913:69:PASS:1195:2598:1482:2:34:0:23:0	0/0:0,-6.61878,-77.6961:66:PASS:1326:2893:1397:2:34:0:22:0	0/0:0,-5.71678,-67.2972:57:PASS:1098:2413:1310:2:32:0:19:0	0/0:0,-15.0441,-179.393:150:PASS:2317:4380:2461:2:46:0:50:0	0/0:0,-1.91708,-60.6976:19:PASS:1408:2632:1466:2:33:2:18:1	0/0:0,-9.62686,-112.894:96:PASS:2066:4500:2386:2:52:0:32:0	0/0:0,-7.78228,-87.1555:78:PASS:1401:3312:1688:2:42:0:26:0	0/0:0,-6.30404,-72.2824:63:PASS:1550:3161:1656:2:36:0:21:0	0/0:0,-7.82222,-91.9954:78:PASS:1169:2495:1319:2:34:0:26:0	0/0:0,-5.1153,-61.4978:51:PASS:1370:2556:1554:2:24:0:17:0	0/0:0,-5.11494,-60.5974:51:PASS:1089:2489:1213:2:30:0:17:0	0/0:0,-15.347,-185.794:154:PASS:3086:6083:3430:2:75:0:51:0	0/0:0,-7.8242,-95.1974:78:PASS:1227:2463:1477:2:30:0:26:0	0/0:0,-5.11472,-59.7972:51:PASS:1213:2306:1360:2:31:0:17:0	0/0:0,-8.12468,-98.0969:81:PASS:1428:3016:1507:2:49:0:27:0	0/0:0,-6.31911,-75.9975:63:PASS:955:1967:1186:2:29:0:21:0	0/0:0,-7.52177,-89.496:75:PASS:1207:2690:1327:2:41:0:25:0	0/0:0,-6.31963,-76.998:63:PASS:1279:2535:1544:2:29:0:21:0	0/0:0,-7.82342,-93.5966:78:PASS:1169:2488:1316:2:29:0:26:0
Chr01	38291879	38292482	DUP00007754	603	0.987288	0.0127119	0	0	PASS	PRECISE	DUP	60	-1,1	-1,1	TCCAGTGGTAGAAGAAGTGCTCGTTAATGGTAAAGCATCCAGTAATAATGAATATGATTAGTGTGCGCTACGTATATTTTCGTTCCGGGCTAACCCGACACAATGCTGTAGGATAAAATTTTGTTCTGGTGGGATAAAATTTTGTTCTATTTATTAAATAATTATTGCCAAGTATGTAGGAAATATATCATAAGAACCTCAACAAGTTAAATGTTCA	0/0:0,-2.10677,-27.0996:21:PASS:12:21:13:2:14:0:7:0	0/0:0,-9.93048,-121.896:99:PASS:61:97:42:2:50:0:33:0	0/0:0,-10.5303,-124.494:105:PASS:70:114:40:2:48:0:35:0	0/0:0,-10.2307,-123.496:102:PASS:52:97:25:3:41:0:34:0	0/0:0,-3.31034,-41.499:33:PASS:12:46:11:4:17:0:11:0	0/0:0,-8.12501,-97.9972:81:PASS:41:55:42:1:34:0:27:0	0/0:0,-7.82355,-92.9968:78:PASS:34:73:31:2:27:0:26:0	0/0:0,-10.4568,-123.621:105:PASS:52:102:47:2:50:0:35:0	0/1:-154.65,0,-117.112:10000:PASS:72:244:40:4:49:44:42:50	0/1:-21.3844,0,-28.7842:10000:PASS:12:67:17:5:20:18:9:7	0/0:0,-11.1332,-131.795:111:PASS:55:109:42:2:54:0:37:0	0/0:0,-16.848,-197.49:10000:PASS:71:139:53:2:58:0:56:0	0/0:0,-15.9486,-195.194:157:PASS:133:206:118:2:107:0:53:0	0/0:0,-2.10676,-27.0995:21:PASS:14:49:9:4:20:0:7:0	0/0:0,-13.231,-151.586:132:PASS:59:130:45:3:50:0:44:0	0/0:0,-8.70086,-97.771:87:PASS:35:68:30:2:41:0:29:0	0/0:0,-7.21944,-84.6947:72:PASS:39:59:20:2:31:0:24:0	0/0:0,-7.51593,-88.1902:75:PASS:28:67:27:2:37:0:25:0	0/0:0,-15.039,-178.488:150:PASS:72:131:39:2:47:0:50:0	0/0:0,-7.21695,-83.2922:72:PASS:34:63:20:2:31:0:24:0	0/0:0,-13.2382,-157.393:132:PASS:40:114:49:3:62:0:44:0	0/0:0,-6.61588,-75.8932:66:PASS:51:69:21:2:39:0:22:0	0/0:0,-6.61949,-80.3968:66:PASS:33:68:20:3:33:0:22:0	0/0:0,-5.71653,-67.497:57:PASS:31:59:21:2:33:0:19:0	0/0:0,-9.02705,-107.796:90:PASS:48:73:28:2:39:0:30:0	0/0:0,-5.11396,-59.7965:51:PASS:36:52:22:2:33:0:17:0	0/0:0,-19.857,-237.789:10000:PASS:87:179:57:2:101:0:66:0	0/0:0,-8.12418,-97.5964:81:PASS:26:78:38:2:36:0:27:0	0/0:0,-7.52256,-90.3968:75:PASS:25:63:21:3:26:0:25:0	0/0:0,-7.5202,-88.1945:75:PASS:48:74:21:2:47:0:25:0	0/0:0,-6.91979,-80.5961:69:PASS:34:63:20:2:29:0:23:0	0/0:0,-9.01748,-102.787:90:PASS:37:71:33:2:40:0:30:0	0/0:0,-9.02563,-105.695:90:PASS:38:86:33:2:48:0:30:0	0/0:0,-6.61784,-78.3952:66:PASS:21:60:26:3:31:0:22:0
Chr01	39865444	40017356	DEL00015157	151912	0.978814	0.0211864	0	0	PASS	PRECISE	DEL	60	-2,2	-2,2	CATCCGGAAAACCAGTAAAACCTCCACCGGAAGCATAGTTCGATGTGTCTCATGGACAGTGTCCAAGTTCAGCAATCGGGCAGCTTTGCATTCTCCTGTAGCAGTTTTGGAATTGTGTTTTTCTTCAGCTTCCCTTTCTTTTCGGTGTCCCAGTTTTGGAGAGAACTGCTGCAGGAACTGCACATTTTATAGTTGGGAGAAC	0/0:0,-1.80583,-23.4996:18:PASS:2197:4723:2150:2:13:0:6:0	0/0:0,-13.5378,-158.491:135:PASS:10995:23914:11664:2:70:0:45:0	0/0:0,-11.734,-139.594:117:PASS:11526:24684:11427:2:73:0:39:0	0/0:0,-12.3019,-139.96:123:PASS:9890:21449:10411:2:59:0:41:0	0/0:0,-1.80565,-22.3995:18:PASS:3268:6839:3163:2:18:0:6:0	0/0:0,-8.72638,-103.897:87:PASS:8477:18574:9175:2:34:3:29:0	0/0:0,-9.32677,-108.295:93:PASS:8454:18644:9064:2:40:0:31:0	0/0:0,-12.6352,-146.892:126:PASS:10645:23196:10915:2:62:0:42:0	0/0:0,-14.4417,-170.792:144:PASS:13338:26433:13905:2:71:0:48:0	0/0:0,-2.70859,-34.2993:27:PASS:2869:5680:2714:2:20:0:9:0	0/0:0,-18.0488,-212.487:10000:PASS:13774:29742:14102:2:91:0:60:0	0/0:0,-16.8495,-200.792:10000:PASS:13313:28904:13606:2:82:0:56:0	0/0:0,-14.4431,-175.994:144:PASS:24101:52627:25428:2:140:0:48:0	0/0:0,-1.50488,-19.5997:15:PASS:2660:5676:2596:2:16:0:5:0	0/0:0,-14.74,-173.09:147:PASS:11717:25412:12014:2:72:0:49:0	0/0:0,-10.2208,-113.586:102:PASS:7077:14773:7303:2:53:0:34:0	0/0:0,-7.82318,-93.7964:78:PASS:6716:13800:7141:2:48:0:26:0	0/0:0,-8.42482,-100.196:84:PASS:6451:12954:6634:2:52:0:28:0	0/0:0,-16.8494,-202.792:10000:PASS:11621:24088:12393:2:83:0:56:0	0/0:0,-3.51943,-70.0985:35:PASS:6716:14240:7423:2:42:2:20:1	0/0:0,-15.0394,-175.788:150:PASS:10363:22068:11664:2:77:0:50:0	0/0:0,-9.02385,-103.893:90:PASS:8114:16324:8531:2:56:0:30:0	0/0:0,-9.0154,-105.084:90:PASS:7702:16395:8798:2:45:0:30:0	0/0:0,-5.41463,-63.1961:54:PASS:6070:12028:6332:2:42:0:18:0	0/0:0,-7.82378,-93.997:78:PASS:7312:15430:7696:2:45:1:26:0	0/0:0,-5.71737,-68.3978:57:PASS:5550:11147:5736:2:33:0:19:0	0/0:0,-18.05,-215.488:10000:PASS:17421:35736:17672:2:99:0:60:0	0/0:0,-5.71585,-65.3963:57:PASS:6675:14201:7182:2:42:0:19:0	0/0:0,-9.32194,-105.89:93:PASS:6840:13920:6857:2:41:0:31:0	0/0:0,-9.01892,-103.388:90:PASS:7604:15816:7747:2:48:0:30:0	0/0:0,-6.01776,-71.7972:60:PASS:5891:12235:5812:2:36:0:20:0	0/0:0,-6.01829,-72.7977:60:PASS:6680:13724:6809:2:45:0:20:0	0/0:0,-8.11111,-91.5833:81:PASS:7223:14747:7851:2:44:0:27:0	0/0:0,-6.92147,-84.4978:69:PASS:6283:12568:6853:2:39:0:23:0
Chr01	41661499	41662387	DUP00007866	888	0.805085	0.194915	0	0	PASS	PRECISE	DUP	60	-5,5	-5,5	TTTCTCTGGAGGAGATTTTACAGGAACCTTTATCAAATATTAATGCAGAGAATATAGGTAGCTCTGAAGGGCAGAATGCCACTGATGATAACTTCAGTGTTGATCACCGCCATGCTTCATGAGTGTGATAAAATTGACAACACAGTGCGCAACCCCTTTTGTTCTGAAACTAGTATGCATCCTTCAATGCCATCTGATGCTTCCGTCAAGCATCC	0/0:0,-3.0096,-38.2993:30:PASS:9:36:21:2:13:0:10:0	0/0:0,-13.5363,-159.19:135:PASS:77:158:91:2:64:0:45:0	0/0:0,-15.6368,-184.383:157:PASS:57:166:105:2:79:0:52:0	0/0:0,-9.62808,-112.595:96:PASS:36:127:84:2:53:0:32:0	0/0:0,-3.00947,-37.5992:30:PASS:14:50:43:2:23:0:10:0	0/0:0,-15.9478,-189.593:157:PASS:50:149:95:2:50:0:53:0	0/0:0,-14.7451,-176.995:147:PASS:51:146:91:2:45:0:49:0	0/0:0,-14.4436,-173.994:144:PASS:63:134:89:2:52:0:48:0	0/0:0,-16.2456,-192.39:10000:PASS:82:206:83:2:77:0:54:0	0/0:0,-1.80583,-23.2997:18:PASS:17:40:20:2:14:0:6:0	0/0:0,-19.2407,-223.175:10000:PASS:72:195:135:2:86:0:64:0	0/0:0,-19.2551,-226.989:10000:PASS:71:217:125:2:85:0:64:0	0/0:0,-21.0607,-256.689:10000:PASS:163:318:202:2:126:0:70:0	0/0:0,-1.8058,-23.1996:18:PASS:11:34:24:2:18:0:6:0	0/0:0,-14.1328,-163.184:141:PASS:69:155:114:2:65:0:47:0	0/0:0,-6.61931,-78.2966:66:PASS:43:110:67:2:51:1:22:0	0/0:0,-7.51955,-87.8938:75:PASS:52:112:37:3:40:0:25:0	0/0:0,-4.81479,-58.0983:48:PASS:44:99:56:2:41:0:16:0	0/1:-145.016,0,-114.518:10000:PASS:73:461:165:4:78:59:38:47	0/0:0,-5.41666,-66.0981:54:PASS:44:123:56:2:43:0:18:0	0/0:0,-7.52213,-89.3964:75:PASS:72:193:106:2:80:0:25:0	0/0:0,-9.32413,-106.392:93:PASS:47:112:68:2:54:1:31:0	0/1:-103.733,0,-104.637:10000:PASS:51:262:134:3:77:40:34:35	0/0:0,-4.81423,-56.8978:48:PASS:44:85:48:2:35:0:16:0	0/0:0,-7.82207,-92.1953:78:PASS:41:101:70:2:45:0:26:0	0/1:-62.1528,0,-90.9533:10000:PASS:31:159:104:2:53:23:31:23	0/0:0,-15.6465,-187.693:157:PASS:104:216:164:2:96:0:52:0	0/0:0,-2.21547,-62.6949:22:PASS:49:81:63:1:40:0:19:1	0/1:-71.1563,0,-84.0485:10000:PASS:39:185:118:2:56:32:29:24	0/0:0,-9.92943,-118.495:99:PASS:53:120:52:2:49:3:33:0	0/0:0,-3.6103,-42.0979:36:PASS:25:79:56:2:33:0:12:0	0/0:0,-6.01876,-73.7982:60:PASS:46:102:54:2:41:0:20:0	0/0:0,-6.31898,-75.1973:63:PASS:40:89:55:2:40:0:21:0	0/0:0,-6.6201,-79.9974:66:PASS:37:97:36:3:34:0:22:0
Chr01	42061440	42076662	DEL00015631	15222	0.90678	0.0932203	0	0	PASS	PRECISE	DEL	37	-2,2	-2,2	AAGAACATGTGCGTTTATGTGTTGAGCTGCTTAAGATCAAGTAGGTGGGAAGGTGGAATCGGAAGAGTGGCCGTTATGGCCTTTTTGGGCTCCCGTGACCTATAGCACACGTTTTCATGGCCGAAAACAGGTCCGGAGGCCATTTTCTAGTCTTCGGTCCATCGCCGACGTTTTCGACC	0/0:0,-2.32611,-22.6179:23:PASS:291:83:408:0:16:7:8:0	0/0:0,-28.9996,-292.698:10000:PASS:1249:665:4480:0:39:133:99:0	0/0:0,-32.328,-338.816:10000:PASS:1312:548:3547:0:42:102:109:0	0/0:0,-24.6495,-251.264:10000:PASS:1211:560:3619:0:38:92:83:0	0/0:0,-3.83146,-36.417:38:PASS:408:139:605:0:19:11:14:0	0/0:0,-24.9494,-262.163:10000:PASS:949:379:3424:0:24:32:84:0	0/0:0,-24.2716,-263.087:10000:PASS:983:420:3512:0:25:55:82:0	0/0:0,-32.4902,-350.978:10000:PASS:1195:445:3480:0:39:92:109:0	0/0:0,-32.3689,-329.856:10000:PASS:1238:790:4122:0:39:73:110:0	0/0:0,-3.50082,-39.3885:35:PASS:302:115:438:0:14:4:12:0	0/0:0,-36.5556,-373.627:10000:PASS:1485:738:5063:0:49:120:125:0	0/0:0,-31.4912,-316.681:10000:PASS:1582:621:3814:0:58:93:107:0	0/0:0,-39.5196,-395.977:10000:PASS:2760:1560:7936:0:168:135:138:0	0/0:0,-2.70658,-31.1973:27:PASS:318:95:515:0:15:9:9:0	0/0:0,-29.0663,-309.864:10000:PASS:1333:432:3209:0:45:94:99:0	0/0:0,-13.8794,-144.431:139:PASS:741:348:1463:0:27:46:47:0	0/0:0,-11.4322,-132.893:114:PASS:799:318:1131:0:36:70:38:0	0/0:0,-19.7113,-214.441:10000:PASS:744:445:2814:0:25:103:68:0	0/0:0,-16.664,-183.206:10000:PASS:1272:316:1837:0:27:29:56:0	0/0:0,-18.4886,-189.923:10000:PASS:765:454:2905:0:35:72:64:0	0/0:0,-19.5576,-198.289:10000:PASS:1028:445:2709:0:26:63:67:0	0/0:0,-11.7068,-130.067:117:PASS:932:394:1175:0:39:79:39:0	0/0:0,-19.126,-188.957:10000:PASS:731:440:3138:0:24:65:67:0	0/0:0,-17.7045,-173.041:10000:PASS:811:415:2621:0:28:69:62:0	0/0:0,-11.3607,-128.222:114:PASS:969:288:1421:0:33:55:38:0	0/0:0,-6.61912,-77.0965:66:PASS:626:234:893:0:28:56:22:0	0/0:0,-51.3398,-529.956:10000:PASS:1961:1052:7196:0:69:193:178:0	0/0:0,-21.7196,-216.441:10000:PASS:769:487:3214:0:33:97:76:0	0/1:-53.0033,0,-27.0988:10000:PASS:773:330:1924:0:1:72:12:19	0/0:0,-10.7554,-121.718:108:PASS:853:366:1214:0:40:76:36:0	0/0:0,-7.51092,-86.2852:75:PASS:714:194:624:0:24:23:25:0	0/0:0,-7.65683,-89.2301:77:PASS:807:327:1028:0:31:56:26:0	0/0:0,-8.32715,-93.6983:83:PASS:791:350:1079:0:33:60:28:0	0/0:0,-17.4355,-180.174:10000:PASS:636:403:1917:0:26:37:60:0
Chr02	412125	418598	DUP00008187	6473	0.991525	0.00847458	0	0	PASS	PRECISE	DUP	30	-7,7	-7,7	AGAACAGATGAGTGATTTGAATTTTGGATCAAAGGATCAAGTGGGTGCTATAAATCAAATCATCCTTATGTTAGTTCTCCAATGCTTGTTTTAGTATCAAACGACTTGAATTTAAGATATTGGAAAGAAACATTACTAGCCTCTATTTGACAACGGCTAATTCAGCAATAATAGTACGCATAAGGTAAAATAATGAAGGCATACCCTG	0/0:0,-1.50374,-17.8986:15:PASS:255:122:68:1:12:0:5:0	0/0:0,-11.4335,-136.794:114:PASS:1055:686:414:1:38:0:38:0	0/0:0,-12.0199,-138.079:120:PASS:1168:766:462:1:45:0:40:0	0/0:0,-12.3295,-143.687:123:PASS:932:657:358:1:39:0:41:0	0/0:0,-2.10543,-25.4982:21:PASS:385:206:79:1:14:0:7:0	0/0:0,-9.6288,-113.796:96:PASS:775:610:406:1:28:0:32:0	0/0:0,-9.32727,-108.895:93:PASS:818:568:377:1:33:0:31:0	0/0:0,-12.9375,-154.893:129:PASS:1041:671:426:1:41:0:43:0	0/0:0,-14.1427,-171.494:141:PASS:567:1097:552:2:59:0:47:0	0/0:0,-2.40722,-29.299:24:PASS:185:229:86:2:14:0:8:0	0/0:0,-13.2251,-156.38:132:PASS:1154:869:485:1:44:0:44:0	0/0:0,-15.3827,-173.129:154:PASS:1397:786:478:1:57:0:52:0	0/0:0,-15.8978,-185.343:157:PASS:2096:1464:931:1:79:0:53:0	0/0:0,-2.10664,-26.3994:21:PASS:319:166:79:1:14:0:7:0	0/0:0,-9.02472,-104.994:90:PASS:1164:730:430:1:43:0:30:0	0/0:0,-8.71228,-101.682:87:PASS:363:632:282:2:45:0:29:0	0/0:0,-7.82158,-90.8948:78:PASS:339:623:294:2:44:0:26:0	0/0:0,-8.10457,-89.4768:81:PASS:649:470:243:1:27:0:27:0	0/0:0,-14.0963,-158.548:141:PASS:1106:709:493:1:42:0:47:0	0/0:0,-7.51466,-86.5889:75:PASS:353:583:290:2:41:0:25:0	0/0:0,-12.0351,-142.094:120:PASS:485:970:514:2:47:0:40:0	0/0:0,-8.96788,-102.637:90:PASS:392:701:314:2:53:0:30:0	0/0:0,-11.4137,-125.675:114:PASS:712:538:342:1:30:0:38:0	0/0:0,-4.81156,-53.8951:48:PASS:616:431:244:1:25:0:16:0	0/0:0,-11.9157,-125.874:119:PASS:421:603:304:2:41:0:40:0	0/0:0,-4.21021,-48.3958:42:PASS:292:491:221:2:26:0:14:0	0/0:0,-23.9275,-259.445:10000:PASS:1552:1012:675:1:62:0:80:0	0/0:0,-8.04146,-88.1136:80:PASS:611:478:260:1:30:0:27:0	0/0:0,-8.71181,-95.5819:87:PASS:663:510:237:1:35:0:29:0	0/0:0,-7.22003,-84.8953:72:PASS:394:600:310:2:37:0:24:0	0/0:0,-5.95533,-64.5347:60:PASS:558:378:223:1:28:0:20:0	0/0:0,-6.61376,-74.4911:66:PASS:325:547:285:2:38:0:22:0	0/0:0,-10.2277,-119.893:102:PASS:376:670:322:2:46:0:34:0	0/0:0,-6.62038,-80.4977:66:PASS:322:581:274:2:40:0:22:0
Chr02	810812	4720930	INV00020264	3910118	0.122881	0.877119	0	0	PASS	PRECISE	INV	51	-2,2	-2,2	AGATGTATTGTTAGGAATATCTCTGTATGTTTTGGCAGGGTGTCACAAGTTACAGCATAATAATAATGTCACAGGTTGCAACATTGTGGAACCGTACTCCAACTACCTTTAGTTTTTCATGTGCAAAGTGTTTACTAGCTATTAACATTTAACAGAATAATGCATGATGCTGTTTCATGC	0/1:-2.79601,0,-10.7959:28:PASS:19625:97889:52380:3:11:0:3:1	0/1:-176.824,0,-51.9299:10000:PASS:103654:511338:271132:3:51:0:20:56	0/1:-142.633,0,-65.8369:10000:PASS:99531:524791:282444:3:38:1:23:44	0/1:-114.452,0,-39.8515:10000:PASS:89921:459966:245941:3:33:0:16:36	0/1:-14.789,0,-20.1898:148:PASS:28742:139526:74667:3:17:1:6:5	0/1:-83.0568,0,-47.358:10000:PASS:85010:396141:210455:3:17:0:17:27	0/1:-116.849,0,-34.8521:10000:PASS:84778:398841:212864:3:24:0:14:37	0/1:-131.842,0,-45.8488:10000:PASS:93882:491969:263572:3:38:1:17:41	0/0:0,-15.3445,-181.892:154:PASS:117156:637931:315774:3:66:0:51:0	0/0:0,-2.70879,-35.2995:27:PASS:22992:131459:65895:3:21:0:9:0	0/1:-149.725,0,-74.234:10000:PASS:123261:626031:323361:3:44:2:26:49	0/1:-168.426,0,-52.3663:10000:PASS:114940:609981:326527:3:45:3:20:54	0/1:-222.396,0,-80.6285:10000:PASS:217096:1116005:587807:3:89:3:29:74	0/1:-31.7862,0,-10.6008:106:PASS:23492:113736:62466:3:14:1:4:10	0/1:-122.54,0,-68.9409:10000:PASS:98609:525733:289069:3:44:0:24:39	0/1:-101.36,0,-34.4564:10000:PASS:63447:373815:187391:3:35:0:15:33	0/1:-89.7515,0,-54.5553:10000:PASS:61149:342688:153791:3:36:0:19:30	0/1:-93.2583,0,-30.6617:10000:PASS:57317:307590:149537:3:30:0:12:30	0/1:-149.532,0,-71.7293:10000:PASS:97559:557127:291816:3:25:3:27:48	0/1:-22.0656,0,-88.5638:10000:PASS:65384:327682:179547:3:38:1:27:9	0/1:-89.2568,0,-50.3554:10000:PASS:95188:506031:237160:3:33:0:19:29	0/1:-79.9589,0,-43.7671:10000:PASS:74172:409572:190409:3:40:0:16:28	0/1:-86.0598,0,-39.0619:10000:PASS:73709:371024:191302:3:30:1:14:27	0/1:-76.8591,0,-48.5618:10000:PASS:53825:291860:141567:3:32:1:17:25	0/1:-111.045,0,-57.9474:10000:PASS:64711:337909:176258:3:27:0:20:35	0/1:-60.0682,0,-40.468:10000:PASS:49858:291748:130897:3:26:0:15:20	0/1:-433.535,0,-56.3557:10000:PASS:150798:790718:407387:3:88:1:29:134	0/1:-83.4614,0,-31.2686:10000:PASS:61049:349319:158973:3:33:1:12:27	0/1:-98.9588,0,-24.0629:10000:PASS:61394:319688:153689:3:22:0:10:31	0/0:0,-5.523,-89.2963:55:PASS:67261:358453:174210:3:54:0:26:1	0/1:-89.561,0,-29.7624:10000:PASS:49430:269357:134429:3:28:0:12:28	0/1:-102.456,0,-25.9614:10000:PASS:54791:327309:144911:3:26:0:11:33	0/1:-69.0633,0,-40.0666:10000:PASS:66115:364173:153972:3:43:1:14:23	0/1:-73.1689,0,-19.9731:10000:PASS:58215:327619:147704:3:23:0:8:23
Chr02	2048158	2051723	DEL00017435	3565	0.987288	0	0.0127119	0	PASS	PRECISE	DEL	46	-3,3	-3,3	CTCTATACAGAAATGAAGGGTATCTGCAATGAACTATGATGTAGAAAGTGGACTTATCGAGAGCAGTGAGTGAAACTATGATGCCAAAGAAGGACCAATGCTTATCAACATTTGACTATAGCATGGGTACATCTTGGCTCGACCGTGAGGTTTCTAGCGATGCATTATTCAGAACAATATCTCAGCGATGCCACAGTATGTAC	0/0:0,-1.49082,-16.3857:15:PASS:49:141:63:3:8:2:5:0	0/0:0,-11.6394,-130.399:116:PASS:296:731:463:2:33:5:39:0	0/0:0,-10.7074,-119.17:107:PASS:307:773:411:2:44:1:36:0	0/0:0,-8.9473,-96.6164:89:PASS:259:678:353:2:34:7:30:0	0/0:0,-1.80137,-20.8952:18:PASS:76:175:83:2:9:0:6:0	0/0:0,-10.446,-118.91:104:PASS:236:502:267:2:17:1:35:0	0/0:0,-9.32376,-107.892:93:PASS:267:511:276:2:16:0:31:0	0/0:0,-11.6329,-131.293:116:PASS:296:696:389:2:30:7:39:0	0/0:0,-14.3819,-167.932:144:PASS:358:625:287:2:65:0:48:0	0/0:0,-2.10654,-25.9993:21:PASS:85:130:47:2:15:0:7:0	0/0:0,-18.0411,-205.279:10000:PASS:387:855:530:2:42:4:60:0	0/0:0,-11.359,-127.42:114:PASS:339:822:441:2:38:3:38:0	0/0:0,-13.3559,-143.309:134:PASS:580:1364:788:2:72:6:46:0	0/0:0,-2.10344,-23.6962:21:PASS:47:165:78:3:12:2:7:0	0/0:0,-12.0237,-136.683:120:PASS:329:737:346:2:36:2:40:0	0/0:0,-7.21964,-84.5949:72:PASS:239:390:148:2:41:0:24:0	1/1:-80.7956,-6.91933,0:69:PASS:188:39:170:0:0:38:0:23	0/0:0,-7.51867,-87.6929:75:PASS:224:352:181:2:52:0:25:0	0/0:0,-9.28046,-104.749:93:PASS:358:524:176:2:32:0:31:0	0/0:0,-6.61885,-78.2962:66:PASS:195:373:171:2:42:0:22:0	0/0:0,-9.32778,-110.696:93:PASS:309:467:314:1:51:0:31:0	0/0:0,-9.62771,-112.895:96:PASS:227:414:180:2:63:0:32:0	0/0:0,-9.56496,-109.132:96:PASS:248:496:232:2:49:1:32:0	0/0:0,-6.01533,-70.2947:60:PASS:175:352:149:2:37:0:20:0	0/0:0,-9.32756,-111.796:93:PASS:218:539:180:3:45:0:31:0	0/0:0,-4.80992,-54.1934:48:PASS:160:320:142:2:34:0:16:0	0/0:0,-15.3425,-182.89:154:PASS:573:793:475:2:103:1:51:0	0/0:0,-8.39597,-96.7671:84:PASS:209:327:165:2:38:0:28:0	0/0:0,-7.2178,-82.4931:72:PASS:163:407:170:2:33:0:24:0	0/0:0,-7.82235,-92.5956:78:PASS:216:364:178:2:45:0:26:0	0/0:0,-7.22151,-86.6968:72:PASS:165:359:150:2:34:0:24:0	0/0:0,-7.52222,-89.3965:75:PASS:197:336:165:2:45:0:25:0	0/0:0,-7.22171,-85.797:72:PASS:198:366:185:2:44:0:24:0	0/0:0,-6.31636,-74.6947:63:PASS:164:337:148:2:30:0:21:0
Chr02	2055684	2068223	DUP00009322	12539	0.991525	0.00847458	0	0	PASS	PRECISE	DUP	47	-2,2	-2,2	CCGCAGTACAACTGGGATACAGCTAGCAGGTAAGATTTTATATGTTCCAAGCTTGTTTGCTGTTCTCAAGCCTTGTGATGATGCATTATTAGGCCATCCGCAGTACCTTCTTGAGAGGGTCTTTGCAGAAACTTATCTCTAGATTTGGTGAGCATTCAATTGATCTTCTGAAGCAAAACAAACCTGCGAATCTTGGAAGAATGGCTACGCC	0/0:0,-1.50472,-18.7996:15:PASS:215:238:175:1:11:0:5:0	0/0:0,-12.5046,-142.061:125:PASS:1472:1142:991:1:59:0:42:0	0/0:0,-14.0915,-165.343:141:PASS:1456:1275:995:1:59:0:47:0	0/0:0,-13.5381,-160.992:135:PASS:1277:1065:941:1:56:0:45:0	0/0:0,-3.30983,-41.2985:33:PASS:304:367:301:1:16:0:11:0	0/0:0,-9.62865,-115.196:96:PASS:937:905:731:1:37:0:32:0	0/0:0,-10.2284,-120.393:102:PASS:1005:908:735:1:37:0:34:0	0/0:0,-14.4408,-171.891:144:PASS:1345:1136:985:1:66:0:48:0	0/0:0,-13.2359,-155.091:132:PASS:1054:2253:1174:2:55:0:44:0	0/0:0,-2.06031,-23.2531:21:PASS:212:465:259:2:13:0:7:0	0/0:0,-20.7415,-239.77:10000:PASS:1811:1389:1269:1:87:0:69:0	0/0:0,-18.9547,-228.39:10000:PASS:1577:1471:1132:1:68:1:63:0	0/0:0,-22.4956,-267.618:10000:PASS:2722:2469:2120:1:119:0:75:0	0/0:0,-2.10621,-26.399:21:PASS:293:290:224:1:15:0:7:0	0/0:0,-12.0259,-139.085:120:PASS:1319:1385:1054:1:54:0:40:0	0/0:0,-9.02275,-103.492:90:PASS:561:1265:696:2:45:0:30:0	0/0:0,-6.91794,-79.9942:69:PASS:411:1234:599:2:38:0:23:0	0/0:0,-8.32613,-94.4973:83:PASS:609:1248:621:2:42:0:28:0	0/0:0,-13.2385,-159.093:132:PASS:929:1081:1109:1:62:0:44:0	0/0:0,-4.51391,-67.9992:45:PASS:631:1366:655:2:32:1:20:1	0/0:0,-13.4761,-152.43:135:PASS:980:1853:1115:2:69:0:45:0	0/0:0,-9.92034,-110.886:99:PASS:678:1435:771:2:45:0:33:0	0/0:0,-9.62316,-113.29:96:PASS:828:1437:844:2:33:0:32:0	0/0:0,-7.18811,-82.0634:72:PASS:565:1176:549:2:38:0:24:0	0/0:0,-8.71014,-96.9803:87:PASS:869:1429:638:2:28:0:29:0	0/0:0,-6.31699,-72.7954:63:PASS:482:993:513:2:24:0:21:0	0/0:0,-18.2078,-209.645:10000:PASS:1511:3233:1501:2:70:1:61:0	0/0:0,-6.6154,-75.1927:66:PASS:593:1220:653:2:29:0:22:0	0/0:0,-8.08812,-89.0603:81:PASS:645:1241:609:2:34:0:27:0	0/0:0,-11.1283,-127.89:111:PASS:643:1324:653:2:48:0:37:0	0/0:0,-6.01454,-69.6939:60:PASS:610:1098:553:2:32:0:20:0	0/0:0,-7.22185,-86.9971:72:PASS:564:1097:601:2:36:0:24:0	0/0:0,-8.99498,-102.464:90:PASS:617:1354:628:2:37:0:30:0	0/0:0,-6.62076,-81.5981:66:PASS:570:1079:582:2:24:0:22:0
Chr02	2148208	5785118	DUP00009349	3636910	0.957627	0.0423729	0	0	PASS	PRECISE	DUP	27	-2,2	-2,2	TAATTAGATGAATTTGTTAGTATTACCCTGTTCTACTGATTCCTAAATGAGAGGTGCACCTCATCGTGTTTGTGTAGAAAGATTTGGGGGCAAATCAACTCAGGGAGTTTTTCCTCTCCTGGTGCCTTTTCTTATGTCACCACACATTTACATTTTAGCCCTGCTTATATATCTATATTA	0/0:0,-2.04747,-21.1403:20:PASS:42605:93689:48523:2:6:0:7:0	0/0:0,-19.3654,-192.896:10000:PASS:223288:489270:247186:2:37:0:67:0	0/0:0,-18.5355,-180.269:10000:PASS:227157:507881:258038:2:39:1:65:0	0/0:0,-13.7193,-131.471:137:PASS:203561:434669:227496:2:29:0:47:0	0/0:0,-3.54111,-36.6287:35:PASS:60265:134717:68627:2:6:0:12:0	0/0:0,-14.7428,-154.59:147:PASS:177311:375492:191459:2:16:1:51:0	0/0:0,-15.0767,-149.323:151:PASS:177636:379027:194086:2:22:1:52:0	0/0:0,-16.4054,-158.847:10000:PASS:215229:472752:241837:2:32:1:57:0	0/0:0,-14.4407,-169.791:144:PASS:302924:578487:290237:2:60:0:48:0	0/0:0,-1.80575,-22.8996:18:PASS:61393:121371:60682:2:12:0:6:0	0/0:0,-22.1928,-223.015:10000:PASS:277669:590741:296768:2:38:1:76:0	0/0:0,-22.6108,-222.232:10000:PASS:266026:586043:297967:2:41:0:77:0	0/0:0,-18.3934,-191.329:10000:PASS:487037:1063529:538857:2:51:0:63:0	0/0:0,-1.80516,-21.999:18:PASS:46687:112996:57214:2:7:0:6:0	0/0:0,-19.8379,-184.067:10000:PASS:218576:517184:264149:2:46:0:69:0	0/0:0,-9.41992,-97.387:94:PASS:174109:348405:158517:2:40:1:32:0	0/0:0,-10.6149,-109.078:106:PASS:166146:297999:144722:2:45:3:36:0	0/0:0,-11.3723,-129.733:114:PASS:139501:283416:145155:2:34:0:38:0	0/1:-119.145,0,-61.3624:10000:PASS:263644:511323:262214:2:36:16:23:42	0/0:0,-12.2613,-138.419:123:PASS:150991:311227:170888:2:30:2:41:0	0/0:0,-20.413,-223.943:10000:PASS:229119:466618:222974:2:51:0:68:0	0/0:0,-12.256,-135.214:123:PASS:199657:356430:180185:2:42:4:41:0	0/0:0,-12.2386,-142.496:122:PASS:170832:344480:180809:2:34:0:41:0	0/0:0,-10.8153,-124.878:108:PASS:133558:268787:138297:2:36:0:36:0	0/0:0,-13.9777,-156.229:140:PASS:153738:316126:163019:2:48:5:47:0	0/0:0,-3.00901,-35.8987:30:PASS:139435:258635:115456:2:16:0:10:0	0/0:0,-16.2177,-191.062:10000:PASS:353959:744722:389186:2:71:0:54:0	0/0:0,-8.66298,-94.8331:87:PASS:166567:303870:150455:2:40:4:29:0	0/0:0,-15.0213,-166.67:150:PASS:144616:293422:150524:2:42:0:50:0	0/0:0,-10.9855,-121.847:110:PASS:170386:326956:156591:2:40:2:37:0	0/0:0,-16.8436,-193.486:10000:PASS:123985:249784:130915:2:41:0:56:0	0/0:0,-11.133,-133.395:111:PASS:156432:285393:140865:2:36:0:37:0	0/0:0,-4.81443,-57.6979:48:PASS:181078:314082:146396:2:28:0:16:0	0/0:0,-12.9353,-152.391:129:PASS:156989:284325:137197:2:40:6:43:0
Chr02	2387458	2390340	DUP00009424	2882	0.978814	0.0211864	0	0	PASS	PRECISE	DUP	60	-3,3	-3,3	AAGGCCTAAGGCCTAAGGCCAATTTCCGAACCATATAGCTGCGTGGATGTTTTGGTGATGTAGCAAGTTAAACATAGGAGAGAAAAGTTATTCCATAGTGGAGATACAGCACCATGTTTTATTTTTTAAGTGGATGCAACATCTTTTATTTGATCAGTGGAACACGAGAGTTTCAAGTTCATGAAAGGGCCACTATGTTCAGGCCCTTGTCTTGCAATT	0/0:0,-2.70807,-33.2988:27:PASS:60:69:26:2:12:0:9:0	0/0:0,-9.92991,-119.496:99:PASS:237:350:93:2:39:0:33:0	0/0:0,-13.2319,-152.087:132:PASS:230:427:113:2:55:0:44:0	0/0:0,-9.29867,-108.867:93:PASS:223:329:99:2:30:0:31:0	0/0:0,-1.8058,-23.2996:18:PASS:75:98:23:2:15:0:6:0	0/0:0,-10.2306,-121.096:102:PASS:166:276:85:2:30:0:34:0	0/0:0,-10.2301,-120.895:102:PASS:191:282:91:2:27:0:34:0	0/0:0,-11.1322,-133.394:111:PASS:237:410:92:2:41:0:37:0	0/0:0,-12.9393,-156.795:129:PASS:283:482:178:2:65:0:43:0	0/0:0,-2.10684,-27.3996:21:PASS:55:129:45:3:22:0:7:0	0/0:0,-13.5387,-158.492:135:PASS:323:489:112:2:47:0:45:0	0/0:0,-16.5468,-197.09:10000:PASS:283:503:124:2:53:0:55:0	0/0:0,-12.4959,-152.353:125:PASS:501:904:185:3:70:0:42:0	0/0:0,-1.80559,-22.1994:18:PASS:48:76:13:2:12:0:6:0	0/0:0,-13.3728,-157.726:134:PASS:248:413:122:2:49:0:45:0	0/0:0,-6.01451,-70.1939:60:PASS:187:271:131:2:43:0:20:0	0/0:0,-7.52192,-89.1962:75:PASS:141:232:132:2:43:0:25:0	0/0:0,-6.92061,-82.5969:69:PASS:131:219:91:2:43:0:23:0	0/0:0,-15.6465,-188.493:157:PASS:297:410:154:2:55:0:52:0	0/0:0,-3.42007,-76.8954:34:PASS:137:266:109:2:34:5:23:1	0/0:0,-11.7351,-140.595:117:PASS:221:460:160:2:55:0:39:0	0/0:0,-7.82217,-92.4954:78:PASS:208:287:143:2:52:0:26:0	0/0:0,-10.2262,-119.291:102:PASS:185:274:85:2:43:0:34:0	0/0:0,-6.61905,-79.1964:66:PASS:138:220:105:2:30:0:22:0	0/0:0,-11.1328,-133.795:111:PASS:165:276:125:2:58:0:37:0	0/0:0,-8.12336,-96.9956:81:PASS:137:200:128:2:35:0:27:0	0/0:0,-19.2569,-230.991:10000:PASS:361:591:77:3:64:0:64:0	0/0:0,-7.52275,-90.597:75:PASS:125:252:104:2:44:0:25:0	0/0:0,-6.61505,-77.1924:66:PASS:126:240:105:2:37:0:22:0	0/0:0,-9.32636,-109.594:93:PASS:170:265:52:2:36:0:31:0	0/0:0,-6.01793,-71.3973:60:PASS:134:202:56:2:35:0:20:0	0/0:0,-7.2195,-86.2948:72:PASS:128:190:81:2:33:0:24:0	0/0:0,-8.4253,-101.496:84:PASS:165:274:120:2:50:0:28:0	0/0:0,-5.71517,-66.8956:57:PASS:127:219:88:2:27:0:19:0
Chr02	3500660	3505599	DEL00018278	4939	0.974576	0.0254237	0	0	PASS	PRECISE	DEL	60	-5,5	-5,5	ATATAATACAACATGCACTTGGCATTGCAGAATTCTACAGAAACAAACAAGACCAGAACTCCAGAAGTATGTGTGGTATGTATTGCACTACCATGACCATCTGTACATAGATTCTTCAAACCAGTTCATTGCATTCATACAAAACATTGCAGATGTTGCGTGCGAACATTCAGAAGAAACGGCAAGTTACGGTGACTTCTTCCTATTGACGCAGCAT	0/0:0,-1.80563,-22.4994:18:PASS:51:105:95:1:11:0:6:0	0/0:0,-9.5924,-113.759:96:PASS:365:485:401:1:31:0:32:0	0/0:0,-10.833,-132.096:108:PASS:324:520:401:1:38:0:36:0	0/0:0,-8.12315,-95.9953:81:PASS:307:486:345:1:35:0:27:0	0/0:0,-2.10651,-26.0993:21:PASS:113:143:122:1:11:0:7:0	0/0:0,-8.12432,-95.8965:81:PASS:252:433:334:1:26:1:27:0	0/0:0,-8.72581,-102.896:87:PASS:243:482:342:2:27:1:29:0	0/0:0,-10.2287,-123.394:102:PASS:315:495:417:1:32:0:34:0	0/0:0,-12.3378,-152.396:123:PASS:448:631:468:1:37:0:41:0	0/0:0,-2.40776,-30.9995:24:PASS:91:120:104:1:8:0:8:0	0/0:0,-12.936,-155.992:129:PASS:420:671:500:1:47:0:43:0	0/0:0,-15.0334,-178.482:150:PASS:431:564:529:1:41:1:50:0	0/0:0,-14.441,-177.592:144:PASS:871:1241:805:1:67:0:48:0	0/0:0,-1.80568,-23.0995:18:PASS:71:78:115:1:7:0:6:0	0/0:0,-11.4319,-137.793:114:PASS:401:469:425:1:36:0:38:0	0/0:0,-9.92819,-115.694:99:PASS:232:374:277:1:35:0:33:0	0/0:0,-8.71896,-98.5891:87:PASS:228:391:256:2:24:0:29:0	0/0:0,-6.31794,-74.3963:63:PASS:226:335:235:1:26:1:21:0	0/0:0,-14.4436,-174.494:144:PASS:467:672:441:1:40:0:48:0	0/1:-2.87512,0,-79.0725:29:PASS:273:421:247:2:24:6:24:3	0/0:0,-13.1936,-155.648:132:PASS:419:578:347:2:49:0:44:0	0/0:0,-8.12356,-94.2957:81:PASS:284:483:281:2:29:0:27:0	0/0:0,-7.22007,-87.2953:72:PASS:262:475:231:2:26:0:24:0	0/0:0,-6.91955,-81.0959:69:PASS:213:323:231:1:26:0:23:0	0/0:0,-7.52276,-90.897:75:PASS:263:328:276:1:32:0:25:0	0/0:0,-6.91429,-79.9906:69:PASS:232:301:180:1:22:0:23:0	0/0:0,-16.8469,-198.989:10000:PASS:614:795:582:1:57:0:56:0	0/0:0,-6.91847,-80.7948:69:PASS:252:370:233:2:27:0:23:0	0/0:0,-7.52275,-90.497:75:PASS:217:367:254:2:26:0:25:0	0/0:0,-6.61844,-77.0958:66:PASS:253:410:261:2:29:0:22:0	0/0:0,-7.52258,-89.7968:75:PASS:161:288:240:1:21:0:25:0	0/0:0,-7.82318,-93.1964:78:PASS:239:327:260:1:29:0:26:0	0/0:0,-6.91858,-80.6949:69:PASS:281:433:280:2:26:0:23:0	0/0:0,-5.71776,-69.9982:57:PASS:231:318:224:1:21:0:19:0
Chr02	4616516	4618197	DUP00010238	1681	0.974576	0.0254237	0	0	PASS	PRECISE	DUP	60	-4,4	-4,4	GCAAATCAGTAGGACTGAGATCGATCTGGATAGATCCCTGACCCTGAGGTAGATCAAGCTATAGGTTAATTTCTAGAACAATAATAAGGAAACTCTGAAGATTGTGCTTTATCAACAGTATACACATAGACTGTGTTGACATCAAGAGTTCCACTAGACCTATGTCTCGAGACACACTTCAATGCAAACCAATACTTCATAGTTTTCATATATAAA	0/0:0,-1.80569,-22.5995:18:PASS:34:73:29:2:14:0:6:0	0/0:0,-12.0328,-137.292:120:PASS:148:239:146:2:69:0:40:0	0/0:0,-13.5405,-163.494:135:PASS:153:255:125:2:65:0:45:0	0/0:0,-10.8293,-126.892:108:PASS:118:218:133:2:52:0:36:0	0/0:0,-2.70872,-34.7994:27:PASS:56:88:27:2:25:0:9:0	0/0:0,-8.72655,-104.697:87:PASS:130:211:112:2:36:0:29:0	0/0:0,-7.52256,-89.1968:75:PASS:121:181:83:2:31:0:25:0	0/0:0,-10.523,-120.887:105:PASS:123:244:107:2:46:0:35:0	0/0:0,-17.7471,-206.286:10000:PASS:155:319:168:2:76:0:59:0	0/0:0,-2.40731,-29.7991:24:PASS:56:87:28:2:22:0:8:0	0/0:0,-14.7439,-175.293:147:PASS:149:310:169:2:79:0:49:0	0/0:0,-14.1319,-160.783:141:PASS:172:338:139:2:84:0:47:0	0/0:0,-14.4213,-175.872:144:PASS:293:551:294:2:124:0:48:0	0/0:0,-2.10672,-26.7995:21:PASS:43:67:29:2:20:0:7:0	0/0:0,-14.439,-168.69:144:PASS:180:259:138:2:64:0:48:0	0/0:0,-7.521,-88.5952:75:PASS:95:186:90:2:39:0:25:0	0/0:0,-7.82391,-94.1971:78:PASS:83:204:70:3:36:0:26:0	0/0:0,-8.12492,-98.1971:81:PASS:70:165:87:2:34:0:27:0	0/0:0,-14.7451,-178.295:147:PASS:180:328:160:2:53:0:49:0	0/0:0,-9.32827,-112.596:93:PASS:56:186:99:2:40:2:31:0	0/0:0,-12.0348,-142.994:120:PASS:115:219:144:2:58:0:40:0	0/0:0,-8.42462,-99.9958:84:PASS:101:225:95:2:52:0:28:0	0/0:0,-7.52335,-93.5976:75:PASS:77:166:85:2:32:0:25:0	0/0:0,-6.61892,-79.3963:66:PASS:68:164:99:2:37:0:22:0	0/0:0,-6.92172,-85.498:69:PASS:106:213:85:2:48:0:23:0	0/0:0,-7.22033,-84.9956:72:PASS:82:161:76:2:32:0:24:0	0/0:0,-17.1504,-205.792:10000:PASS:224:440:238:2:92:0:57:0	0/0:0,-6.91896,-81.2953:69:PASS:83:184:80:2:38:0:23:0	0/0:0,-8.72722,-106.797:87:PASS:89:174:106:2:39:0:29:0	0/0:0,-3.61108,-43.5987:36:PASS:93:167:98:2:39:0:12:0	0/0:0,-9.32639,-110.394:93:PASS:80:168:91:2:42:0:31:0	0/0:0,-8.72649,-105.097:87:PASS:87:186:101:2:41:0:29:0	0/0:0,-9.02581,-107.495:90:PASS:96:205:97:2:48:0:30:0	0/0:0,-7.52337,-91.9976:75:PASS:83:173:86:2:33:0:25:0
Chr02	5113424	5116798	DEL00019540	3374	0.995763	0.00423729	0	0	PASS	PRECISE	DEL	60	-5,5	-5,5	AATGTGACACAGGAAGCCTAAGAAGAGATATGCGATGATGTGCATCTGAACATCAAAAGGATAGTGAAGCAGATATGCGAATGAGTTGAGGTGGGTGATTGTGGCTTCCAATTTTTTTCAGCCAAATGTTTAGTTTTATATACAGGTACAGTTCCCATGACCAAACACTTATGTACTGACCATACACTTTGATGGTTAGGGACATTACAGATACTGTATATGC	0/0:0,-2.40756,-30.0993:24:PASS:70:116:37:2:16:0:8:0	0/0:0,-9.92176,-113.288:99:PASS:284:519:218:2:52:0:33:0	0/0:0,-12.035,-141.794:120:PASS:316:507:174:2:60:0:40:0	0/0:0,-9.32462,-105.093:93:PASS:249:452:174:2:49:0:31:0	0/0:0,-2.40754,-30.2993:24:PASS:103:168:49:2:19:0:8:0	0/0:0,-7.22203,-86.4973:72:PASS:211:371:139:2:29:0:24:0	0/0:0,-9.02728,-107.396:90:PASS:210:379:157:2:26:1:30:0	0/0:0,-12.6352,-147.192:126:PASS:328:542:184:2:60:0:42:0	0/0:0,-12.6368,-152.094:126:PASS:381:641:238:2:60:0:42:0	0/0:0,-2.70855,-34.1993:27:PASS:102:134:38:2:20:0:9:0	0/0:0,-13.2331,-152.988:132:PASS:332:635:227:2:48:0:44:0	0/0:0,-15.3435,-179.591:154:PASS:387:681:250:2:67:0:51:0	0/0:0,-16.5508,-205.394:10000:PASS:598:1178:559:2:111:0:55:0	0/0:0,-1.50468,-18.5995:15:PASS:83:140:46:2:16:0:5:0	0/0:0,-10.8315,-128.494:108:PASS:337:543:204:2:54:0:36:0	0/0:0,-7.21852,-82.4938:72:PASS:207:376:140:2:45:0:24:0	0/0:0,-27.9799,-329.484:10000:PASS:564:1382:244:3:136:0:93:0	0/0:0,-7.52165,-87.9959:75:PASS:159:361:141:2:37:0:25:0	0/0:0,-27.0732,-319.88:10000:PASS:604:1204:213:3:86:0:90:0	0/0:0,-9.02148,-104.291:90:PASS:206:418:145:2:45:0:30:0	0/0:0,-13.2232,-152.178:132:PASS:308:509:168:2:60:0:44:0	0/0:0,-9.32218,-105.99:93:PASS:225:434:160:2:51:0:31:0	0/0:0,-8.72263,-107.193:87:PASS:215:401:163:2:48:0:29:0	0/0:0,-6.62002,-79.5974:66:PASS:141:333:143:2:42:0:22:0	0/0:0,-9.02567,-107.295:90:PASS:221:342:164:2:50:0:30:0	0/0:0,-11.7261,-132.686:117:PASS:282:553:152:3:62:0:39:0	0/0:0,-18.956,-228.091:10000:PASS:451:810:366:2:96:1:63:0	0/0:0,-6.91936,-80.7957:69:PASS:150:375:168:2:46:0:23:0	0/0:0,-8.11895,-92.7911:81:PASS:190:314:147:2:42:0:27:0	0/0:0,-30.0833,-357.08:10000:PASS:568:1401:262:3:151:1:100:0	0/0:0,-7.81679,-88.39:78:PASS:175:308:102:2:38:0:26:0	0/0:0,-8.72574,-104.896:87:PASS:174:302:167:2:45:0:29:0	0/0:0,-8.1246,-98.1968:81:PASS:213:352:201:2:47:0:27:0	0/0:0,-6.92041,-83.3967:69:PASS:171:312:130:2:36:0:23:0
Chr02	6055861	6061295	DUP00010950	5434	0.961864	0.0381356	0	0	PASS	PRECISE	DUP	60	-3,3	-3,3	CAAGAGTTGACATGTCTAGTAGGTTCTGCACATTGCATATATCTAGATAGAGCTAAGCTCGTGCACAACCATTAATAAATAATAGCTTTCACATTTAGAAAATAGAGTTCATCATCCATATTCTGTTGTTATTGAATGCTATAGACAGTAATGTTTTAACCTGTGGGGCCAACTGCTAATCTGGAAATACAGTATAATTTACTTAGGGGGTCATTTCCCT	0/0:0,-1.80584,-23.3997:18:PASS:118:172:122:1:14:0:6:0	0/0:0,-14.1376,-166.589:141:PASS:446:814:434:2:65:0:47:0	0/0:0,-16.4483,-194.592:10000:PASS:485:902:488:2:89:0:55:0	0/0:0,-10.8311,-127.994:108:PASS:412:771:419:2:61:0:36:0	0/0:0,-1.80565,-22.8995:18:PASS:165:203:161:1:16:0:6:0	0/0:0,-9.32832,-111.396:93:PASS:311:670:332:2:37:0:31:0	0/0:0,-8.42531,-99.9965:84:PASS:301:697:319:2:32:0:28:0	0/0:0,-13.2405,-161.895:132:PASS:443:792:416:2:59:0:44:0	0/0:0,-14.1412,-170.393:141:PASS:549:1017:474:2:66:0:47:0	0/0:0,-3.00971,-38.8994:30:PASS:136:197:143:1:20:0:10:0	0/0:0,-12.9394,-159.795:129:PASS:494:1071:497:2:65:0:43:0	0/0:0,-15.3458,-187.493:154:PASS:562:953:543:2:72:0:51:0	0/0:0,-19.2497,-238.684:10000:PASS:951:1932:973:2:125:0:64:0	0/0:0,-2.10661,-26.6994:21:PASS:135:185:132:1:18:0:7:0	0/0:0,-14.7396,-176.989:147:PASS:497:849:517:2:76:0:49:0	0/0:0,-9.62871,-114.096:96:PASS:303:549:297:2:49:0:32:0	0/0:0,-5.41546,-63.8969:54:PASS:295:462:296:2:41:0:18:0	0/0:0,-7.22178,-86.7971:72:PASS:273:466:286:2:43:0:24:0	0/0:0,-11.7333,-141.293:117:PASS:515:743:507:1:51:0:39:0	0/1:-58.658,0,-73.6574:10000:PASS:254:1043:285:4:37:33:24:20	0/0:0,-12.0339,-141.293:120:PASS:383:593:326:2:50:0:40:0	0/0:0,-10.5287,-123.193:105:PASS:346:632:371:2:47:0:35:0	0/0:0,-9.32854,-114.997:93:PASS:273:535:327:2:38:0:31:0	0/0:0,-6.31859,-75.297:63:PASS:261:522:271:2:36:0:21:0	0/0:0,-9.02503,-107.094:90:PASS:357:513:306:2:46:0:30:0	0/0:0,-5.4138,-62.2953:54:PASS:234:444:248:2:34:0:18:0	0/0:0,-19.8567,-237.089:10000:PASS:615:1296:743:2:109:0:66:0	0/0:0,-8.42351,-98.8947:84:PASS:255:474:309:2:40:0:28:0	0/0:0,-7.82396,-95.1972:78:PASS:293:488:299:2:42:0:26:0	0/0:0,-7.82079,-91.294:78:PASS:284:578:330:2:50:0:26:0	0/0:0,-7.21365,-83.1889:72:PASS:263:439:261:2:39:0:24:0	0/0:0,-7.523,-91.7972:75:PASS:260:506:270:2:39:0:25:0	0/0:0,-8.72486,-101.895:87:PASS:291:534:344:2:48:0:29:0	0/0:0,-7.82019,-92.7934:78:PASS:288:449:276:2:37:0:26:0
Chr02	7101462	7102680	DUP00011415	1218	0.978814	0.0211864	0	0	PASS	PRECISE	DUP	60	-2,2	-2,2	AGATTTGTTTGTGGACGTCATTGTGATCAACTCGGGCTGTAATTCAACTAGTAAGTTTTAATTTGGATTGTGAGGTATCAGGTGAGGCATCACGTTGGCCGTGCACTTGGATTTGTTTCCTATTTTTGGATTCTTTTGGTTTTTTATTGTGCTTATGTTATTTTTTTCATTTTTCAGTTCCGATGTAACTTGTCTTAA	0/0:0,-1.80567,-22.5995:18:PASS:29:44:24:2:11:1:6:0	0/0:0,-11.1327,-132.995:111:PASS:106:181:102:2:44:4:37:0	0/0:0,-13.5356,-157.089:135:PASS:114:191:102:2:48:6:45:0	0/0:0,-8.11996,-93.0921:81:PASS:85:130:79:2:33:2:27:0	0/0:0,-3.00972,-38.9994:30:PASS:32:51:38:1:16:1:10:0	0/0:0,-6.31888,-74.3972:63:PASS:66:122:80:2:19:0:21:0	0/0:0,-10.5317,-124.896:105:PASS:63:138:83:2:34:0:35:0	0/0:0,-9.0278,-111.297:90:PASS:116:168:70:2:35:0:30:0	0/0:0,-11.1329,-133.795:111:PASS:118:202:97:2:41:1:37:0	0/0:0,-2.10666,-26.5995:21:PASS:32:54:27:2:14:0:7:0	0/0:0,-12.5957,-151.752:126:PASS:118:168:136:1:46:3:42:0	0/0:0,-15.9445,-185.59:157:PASS:113:236:148:2:60:3:53:0	0/0:0,-17.7495,-218.789:10000:PASS:209:359:204:2:85:2:59:0	0/0:0,-2.10661,-26.3994:21:PASS:32:50:24:2:15:0:7:0	0/0:0,-12.9373,-154.693:129:PASS:112:216:103:2:42:4:43:0	0/0:0,-9.32107,-107.489:93:PASS:80:135:68:2:38:0:31:0	0/0:0,-6.91931,-80.8956:69:PASS:78:108:68:1:33:0:23:0	0/0:0,-7.21872,-83.794:72:PASS:49:109:45:2:25:0:24:0	0/0:0,-11.736,-142.696:117:PASS:170:210:90:2:50:0:39:0	0/0:0,-1.72397,-89.9933:17:PASS:68:117:76:2:34:2:28:2	0/0:0,-8.72668,-104.997:87:PASS:82:139:69:2:29:0:29:0	0/0:0,-11.7295,-133.289:117:PASS:103:166:89:2:52:0:39:0	0/0:0,-6.62025,-81.1976:66:PASS:62:112:60:2:22:4:22:0	0/0:0,-7.52246,-89.9967:75:PASS:68:71:55:1:28:0:25:0	0/0:0,-7.82414,-95.1974:78:PASS:66:136:63:2:32:0:26:0	0/0:0,-6.61911,-77.5964:66:PASS:59:119:54:2:31:0:22:0	0/0:0,-18.353,-219.59:10000:PASS:166:240:137:2:63:0:61:0	0/0:0,-7.51819,-86.3924:75:PASS:65:88:75:1:32:2:25:0	0/0:0,-8.12104,-94.3932:81:PASS:60:110:58:2:29:0:27:0	0/0:0,-8.42214,-98.5933:84:PASS:61:131:74:2:36:2:28:0	0/0:0,-6.31971,-77.5981:63:PASS:66:82:55:1:23:0:21:0	0/0:0,-9.02575,-106.195:90:PASS:72:81:74:1:29:0:30:0	0/0:0,-9.55332,-112.82:96:PASS:82:152:57:2:37:0:32:0	0/0:0,-8.42427,-100.595:84:PASS:58:124:61:2:30:0:28:0
Chr02	7801738	7847266	DEL00021395	45528	0.991525	0.00847458	0	0	PASS	PRECISE	DEL	60	-2,2	-2,2	AGATTTCTCATACTTGATATAAAATTTCTATATCTGTCATTGCAACATTCATATGAAATGCTCACCGCTAATCTGCTGCAGCAATGGGTGGAAATCATGCCTTTGGCTATACACAAAAATAGTCTTTGAAACGAAGATCCATATGTAGAAAATAGTCTTTGATCATCCAGCTGATCTTACTCTATGGTACTGATCTACCTCTGATCTTCCTATTAAATTATTTAACAA	0/0:0,-2.1051,-25.4979:21:PASS:520:1020:425:2:14:0:7:0	0/0:0,-14.1401,-166.392:141:PASS:2705:6304:2335:3:63:0:47:0	0/0:0,-12.034,-139.393:120:PASS:2961:6270:2259:2:52:0:40:0	0/0:0,-10.5283,-122.892:105:PASS:2442:5905:2198:3:54:0:35:0	0/0:0,-3.00968,-38.7994:30:PASS:749:1411:593:2:14:0:10:0	0/0:0,-9.32772,-110.696:93:PASS:2117:5016:1991:2:30:5:31:0	0/0:0,-9.32846,-111.897:93:PASS:2069:5040:1972:2:35:0:31:0	0/0:0,-12.9355,-153.791:129:PASS:2778:6082:2136:2:54:0:43:0	0/0:0,-18.0506,-210.489:10000:PASS:4293:7419:2710:2:67:0:60:0	0/0:0,-2.10641,-26.3992:21:PASS:875:1341:456:2:15:0:7:0	0/0:0,-12.0084,-137.267:120:PASS:3363:7554:2740:2:56:1:40:0	0/0:0,-12.9379,-156.294:129:PASS:3405:7020:2635:2:67:0:43:0	0/0:0,-16.5505,-205.394:10000:PASS:6027:13216:4865:2:101:0:55:0	0/0:0,-2.40764,-30.2994:24:PASS:610:1149:484:2:14:0:8:0	0/0:0,-11.431,-135.392:114:PASS:2864:5992:2323:2:56:0:38:0	0/0:0,-7.51876,-85.593:75:PASS:1929:3111:1296:2:12:0:25:0	0/0:0,-12.3301,-141.988:123:PASS:2895:3356:1468:2:59:0:41:0	0/0:0,-11.1319,-130.494:111:PASS:3123:2260:1384:1:52:1:37:0	0/0:0,-12.9332,-151.289:129:PASS:3507:3632:2355:1:43:0:43:0	0/0:0,-9.32749,-112.296:93:PASS:2909:3205:1166:2:31:0:31:0	0/0:0,-15.4767,-177.523:157:PASS:4305:2672:2049:1:68:0:52:0	0/0:0,-12.0328,-137.892:120:PASS:3589:3955:1715:1:62:0:40:0	0/0:0,-10.7552,-125.518:108:PASS:3157:3226:1304:1:33:0:36:0	0/0:0,-6.91805,-79.4944:69:PASS:1950:2007:1322:1:28:0:23:0	0/0:0,-7.82008,-91.0933:78:PASS:1859:3215:1495:2:38:0:26:0	0/0:0,-3.60929,-42.0969:36:PASS:1413:2456:1015:2:6:0:12:0	0/0:0,-15.3463,-184.494:154:PASS:4314:9014:3261:2:82:0:51:0	0/0:0,-11.7331,-138.093:117:PASS:2939:3483:1366:2:60:0:39:0	0/0:0,-9.62563,-113.993:96:PASS:3220:2284:1264:1:49:0:32:0	0/0:0,-10.2292,-119.894:102:PASS:1738:3312:1208:2:16:0:34:0	0/0:0,-7.82274,-92.496:78:PASS:2947:1723:1092:1:40:0:26:0	0/0:0,-10.5294,-124.193:105:PASS:3218:2107:1340:1:55:0:35:0	0/0:0,-13.2377,-158.492:132:PASS:3267:3580:1355:2:37:0:44:0	0/0:0,-9.6296,-116.697:96:PASS:2884:3215:1250:2:27:1:32:0
Chr02	11805580	11807102	DUP00013201	1522	0.995763	0.00423729	0	0	PASS	PRECISE	DUP	60	-2,2	-2,2	AAATAGGACCAATGGATATTGGTTTTGTTAGAGGCATTCATGACTTCTTATATTTAGCAAACTATAATGACATGCAGAAGATAGAGCAACACACCATGTGGAGAGATTTCTGGCTTGCACGCACAGTCAAGCAGCAAGGACGGTCCAAGACTTTGCATTTGCTTCTCATCAAGCGTGTCCATAATCAAAATCTTCATCAT	0/0:0,-2.40763,-30.2994:24:PASS:37:77:10:3:9:0:8:0	0/0:0,-13.537,-158.891:135:PASS:142:264:28:3:51:0:45:0	0/0:0,-14.7386,-174.688:147:PASS:160:301:36:3:58:0:49:0	0/0:0,-13.8318,-159.984:138:PASS:125:257:37:3:41:0:46:0	0/0:0,-3.31054,-41.8992:33:PASS:66:93:21:2:17:0:11:0	0/0:0,-8.72687,-105.297:87:PASS:96:199:25:3:30:0:29:0	0/0:0,-9.32863,-112.397:93:PASS:102:218:21:4:33:0:31:0	0/0:0,-12.337,-151.495:123:PASS:150:273:37:3:42:0:41:0	0/0:0,-18.3536,-218.191:10000:PASS:155:312:52:3:61:0:61:0	0/0:0,-2.10676,-26.9996:21:PASS:42:66:13:2:10:0:7:0	0/0:0,-15.3456,-183.693:154:PASS:148:320:44:3:60:0:51:0	0/0:0,-15.9428,-187.388:157:PASS:161:343:70:3:62:0:53:0	0/0:0,-15.0456,-186.794:150:PASS:265:545:137:3:95:0:50:0	0/0:0,-2.40782,-31.4996:24:PASS:51:84:16:3:11:0:8:0	0/0:0,-19.8571,-239.389:10000:PASS:141:338:45:4:61:0:66:0	0/0:0,-8.11245,-91.6846:81:PASS:90:191:20:3:32:0:27:0	0/0:0,-7.22101,-86.2963:72:PASS:72:160:21:3:30:0:24:0	0/0:0,-6.92077,-83.2971:69:PASS:80:164:14:3:27:0:23:0	0/0:0,-12.6343,-151.491:126:PASS:157:245:29:3:33:0:42:0	0/0:0,-6.0182,-72.1976:60:PASS:76:131:22:3:32:0:20:0	0/0:0,-9.02462,-105.694:90:PASS:110:214:27:3:37:0:30:0	0/0:0,-9.0247,-103.694:90:PASS:106:196:29:3:33:0:30:0	0/0:0,-7.22044,-86.6957:72:PASS:70:140:23:3:26:0:24:0	0/0:0,-6.61668,-76.994:66:PASS:61:167:9:5:24:0:22:0	0/0:0,-10.2283,-121.093:102:PASS:94:197:35:3:39:0:34:0	0/0:0,-5.11219,-58.5947:51:PASS:64:140:35:3:29:0:17:0	0/0:0,-21.0606,-251.689:10000:PASS:204:412:61:3:78:0:70:0	0/0:0,-7.82193,-91.6952:78:PASS:72:173:43:3:38:0:26:0	0/0:0,-5.71376,-66.7942:57:PASS:75:149:23:3:28:0:19:0	0/0:0,-9.92763,-116.694:99:PASS:93:167:29:3:33:0:33:0	0/0:0,-8.11983,-94.692:81:PASS:76:157:18:3:32:0:27:0	0/0:0,-7.5207,-88.9949:75:PASS:70:149:11:4:25:0:25:0	0/0:0,-9.92756,-116.994:99:PASS:83:202:15:4:33:0:33:0	0/0:0,-6.61348,-77.1908:66:PASS:75:126:21:3:22:0:22:0
Chr02	12281792	12290922	DUP00013351	9130	0.995763	0.00423729	0	0	PASS	PRECISE	DUP	60	-1,1	-1,1	GGGACAACCATCTATAGCCAATAAATCAAAGCCCTCCAATAAAACGTGGTAGATCATTGGGTTCCAAAGATAAGAATCCTCAAAAAAGGAAGGGAGCAAAGAATCCTCACAAAACTCAGAGTGTTACACGTATTGTTAATGGGAAAATATTTTTCCAACTAAGCTAGGCTTGTTACTGTAGTAGCTGAGCAGTCACAGTCTTGCTCCCCGT	0/0:0,-1.80581,-23.3996:18:PASS:139:305:199:2:18:0:6:0	0/0:0,-14.137,-170.889:141:PASS:683:1385:744:2:61:0:47:0	0/0:0,-15.9439,-191.589:157:PASS:750:1581:904:2:77:0:53:0	0/0:0,-11.6973,-137.257:117:PASS:558:1223:745:2:61:0:39:0	0/0:0,-4.21354,-54.4991:42:PASS:184:466:285:2:26:0:14:0	0/0:0,-6.62049,-80.2978:66:PASS:535:1017:528:2:30:0:22:0	0/0:0,-9.93064,-120.297:99:PASS:504:1034:535:2:31:0:33:0	0/0:0,-13.8391,-169.692:138:PASS:614:1409:764:2:48:0:46:0	0/0:0,-15.0429,-178.791:150:PASS:824:1723:417:3:76:0:50:0	0/0:0,-3.61178,-47.4994:36:PASS:161:451:134:3:18:0:12:0	0/0:0,-15.0451,-181.294:150:PASS:813:1752:871:2:66:0:50:0	0/0:0,-16.5447,-192.688:10000:PASS:769:1773:933:2:72:0:55:0	0/0:0,-15.3485,-195.696:154:PASS:1519:3281:1574:2:108:0:51:0	0/0:0,-2.10688,-27.7997:21:PASS:185:381:236:2:16:0:7:0	0/0:0,-12.3372,-151.995:123:PASS:723:1601:816:2:67:0:41:0	0/0:0,-9.92552,-113.792:99:PASS:409:1029:514:2:51:0:33:0	0/0:0,-9.92895,-117.595:99:PASS:456:910:438:2:43:0:33:0	0/0:0,-6.92009,-81.8964:69:PASS:410:868:427:2:31:0:23:0	0/1:-113.02,0,-150.813:10000:PASS:781:3018:839:4:59:50:50:38	0/0:0,-8.72557,-103.996:87:PASS:431:937:477:2:42:0:29:0	0/0:0,-9.92756,-117.294:99:PASS:732:1208:739:2:55:0:33:0	0/0:0,-13.2278,-150.283:132:PASS:532:1226:538:2:65:0:44:0	0/0:0,-10.2307,-123.996:102:PASS:575:1116:469:2:32:0:34:0	0/0:0,-6.61831,-76.1956:66:PASS:360:813:418:2:29:0:22:0	0/0:0,-9.02791,-109.897:90:PASS:467:960:548:2:48:0:30:0	0/0:0,-5.71665,-67.4971:57:PASS:346:786:405:2:38:0:19:0	0/0:0,-21.9641,-264.389:10000:PASS:1036:2251:1201:2:109:0:73:0	0/0:0,-6.91847,-80.6948:69:PASS:436:895:474:2:37:0:23:0	0/0:0,-6.91916,-82.6955:69:PASS:418:909:502:2:37:0:23:0	0/0:0,-9.62862,-116.196:96:PASS:458:1003:524:2:50:0:32:0	0/0:0,-9.62169,-108.489:96:PASS:391:790:443:2:39:0:32:0	0/0:0,-8.42437,-99.6955:84:PASS:397:839:482:2:37:0:28:0	0/0:0,-9.32374,-109.692:93:PASS:463:1030:453:2:49:0:31:0	0/0:0,-6.01832,-72.3977:60:PASS:364:823:447:2:43:0:20:0
Chr02	12449431	12454355	DUP00013393	4924	0.949153	0.0508475	0	0	PASS	PRECISE	DUP	60	-1,1	-1,1	AGAAGTTGTGCGTCAAACAATGACCGCAATTGATGTTCACATCTGTTTAATTTGAATGGTATGCTGTTTCCTATCTTTTTTAAAAAAATCCATGCGGGGAGCAGAACTACTTTGGAAATATTAATAGATTAATTATATAATATATTTTCATAGTAAATCTATTTGGAGACGTGGATGTTAGTACATTTTTATAAATTTGATCAGATTTGAAAATGTTTGAC	0/0:0,-1.80591,-23.8997:18:PASS:95:168:105:2:10:0:6:0	0/0:0,-9.62427,-113.491:96:PASS:342:844:426:2:50:0:32:0	0/0:0,-13.8328,-165.085:138:PASS:354:896:523:2:57:0:46:0	0/0:0,-11.0502,-127.012:111:PASS:306:723:420:2:55:0:37:0	0/0:0,-2.70875,-35.0995:27:PASS:107:214:142:2:14:0:9:0	0/0:0,-6.01852,-72.5979:60:PASS:248:605:291:2:19:0:20:0	0/0:0,-7.82361,-92.6968:78:PASS:267:616:322:2:28:0:26:0	0/0:0,-11.4348,-141.096:114:PASS:346:871:428:2:50:0:38:0	0/0:0,-14.6495,-170.999:146:PASS:392:948:510:2:63:0:49:0	0/0:0,-2.70861,-34.3993:27:PASS:77:197:131:2:15:0:9:0	0/0:0,-12.6368,-154.794:126:PASS:415:998:461:2:50:0:42:0	0/0:0,-14.4444,-176.395:144:PASS:421:1027:573:2:60:0:48:0	0/0:0,-15.6482,-194.195:157:PASS:777:1647:881:2:94:0:52:0	0/0:0,-2.10644,-25.5992:21:PASS:82:192:115:2:11:0:7:0	0/0:0,-14.4431,-173.594:144:PASS:359:897:507:2:66:0:48:0	0/0:0,-8.42402,-97.8952:84:PASS:216:513:300:2:27:0:28:0	0/0:0,-7.52224,-89.4965:75:PASS:209:465:246:2:20:0:25:0	0/0:0,-8.7228,-100.593:87:PASS:205:463:274:2:46:0:29:0	0/0:0,-10.2281,-122.193:102:PASS:284:873:392:3:44:0:34:0	0/0:0,-7.82065,-91.5939:78:PASS:208:450:307:2:40:0:26:0	0/0:0,-10.5312,-126.195:105:PASS:426:686:275:2:53:0:35:0	0/0:0,-8.72447,-102.695:87:PASS:282:606:314:2:25:0:29:0	0/1:-80.557,0,-53.6893:10000:PASS:238:926:180:4:22:31:19:27	0/0:0,-8.12257,-94.1948:81:PASS:200:454:220:2:41:0:27:0	0/0:0,-8.414,-99.1852:84:PASS:201:493:274:2:24:0:28:0	0/0:0,-7.21832,-84.2936:72:PASS:184:433:248:2:33:0:24:0	0/0:0,-19.2548,-228.289:10000:PASS:716:1090:653:2:92:0:64:0	0/0:0,-7.82239,-92.7956:78:PASS:284:489:285:2:36:0:26:0	0/0:0,-8.12147,-97.0937:81:PASS:202:474:261:2:36:0:27:0	0/0:0,-6.31724,-75.2956:63:PASS:235:514:271:2:28:0:21:0	0/0:0,-7.22124,-85.5965:72:PASS:172:405:252:2:30:0:24:0	0/0:0,-8.1232,-94.9954:81:PASS:190:458:233:2:33:0:27:0	0/0:0,-9.32799,-110.996:93:PASS:230:506:321:2:28:0:31:0	0/0:0,-7.52221,-90.3965:75:PASS:202:436:231:2:19:0:25:0
Chr02	12592490	12596314	DUP00013437	3824	0.987288	0.0127119	0	0	PASS	PRECISE	DUP	60	-2,2	-2,2	CACCATTGATTTTTTTCATTCATTTGACTATTCATTTATATATAAATATTTATGCTAATAGATAAATCTCTAAATTAAATTCAAAGTAGACAACATGGCTCAAGTAGACTTCCAATATGATCCAGTTCGAATGTTTATACTGACACTCACGTGGCACCATATGATCATGTTTACAGCCTCCGAGAAATGCATGACTGGGT	0/0:0,-2.70859,-34.4993:27:PASS:89:166:68:2:19:0:9:0	0/0:0,-11.4327,-139.494:114:PASS:297:565:248:2:63:0:38:0	0/0:0,-14.1433,-174.795:141:PASS:344:696:274:2:67:0:47:0	0/0:0,-12.6275,-151.484:126:PASS:297:621:259:2:58:0:42:0	0/0:0,-3.00976,-39.2995:30:PASS:90:189:72:2:21:0:10:0	0/0:0,-9.62895,-114.196:96:PASS:222:399:189:2:35:0:32:0	0/0:0,-8.42533,-99.7965:84:PASS:243:456:154:2:32:0:28:0	0/0:0,-12.0365,-147.295:120:PASS:310:555:252:2:58:0:40:0	0/0:0,-13.841,-167.094:138:PASS:275:747:330:2:60:0:46:0	0/0:0,-2.10691,-27.9997:21:PASS:90:183:74:2:16:0:7:0	0/0:0,-11.4352,-141.596:114:PASS:340:622:326:2:57:0:38:0	0/0:0,-14.1424,-169.794:141:PASS:408:725:323:2:63:0:47:0	0/0:0,-12.9407,-163.796:129:PASS:634:1143:592:2:103:0:43:0	0/0:0,-1.80586,-23.5997:18:PASS:75:152:63:2:21:0:6:0	0/0:0,-14.4444,-178.495:144:PASS:311:662:310:2:72:0:48:0	0/0:0,-10.2263,-117.691:102:PASS:221:424:165:2:44:0:34:0	0/0:0,-7.22218,-87.3975:72:PASS:190:391:162:2:35:0:24:0	0/0:0,-5.40687,-62.9883:54:PASS:183:343:160:2:39:0:18:0	0/0:0,-8.12499,-98.1972:81:PASS:50:413:221:3:24:0:27:0	0/0:0,-9.02366,-104.193:90:PASS:201:367:182:2:50:0:30:0	0/0:0,-7.22042,-84.2957:72:PASS:243:410:143:2:41:0:24:0	0/0:0,-11.1296,-128.491:111:PASS:258:447:235:2:69:0:37:0	0/0:0,-5.41661,-67.1981:54:PASS:123:253:121:2:29:0:18:0	0/0:0,-8.42524,-101.196:84:PASS:213:370:154:2:41:0:28:0	0/0:0,-9.62978,-117.197:96:PASS:201:428:195:2:48:0:32:0	0/0:0,-7.52092,-86.7952:75:PASS:182:299:133:2:28:0:25:0	0/1:-197.767,0,-214.869:10000:PASS:497:2004:450:4:100:101:71:67	0/0:0,-10.2303,-121.895:102:PASS:189:397:167:2:40:0:34:0	0/0:0,-8.12261,-94.9948:81:PASS:224:374:173:2:42:0:27:0	0/0:0,-7.52127,-88.9955:75:PASS:226:390:184:2:48:0:25:0	0/0:0,-8.71402,-99.3842:87:PASS:179:296:165:2:43:0:29:0	0/0:0,-6.91533,-78.8916:69:PASS:207:355:169:2:39:0:23:0	0/0:0,-8.42301,-96.9942:84:PASS:178:366:184:2:33:0:28:0	0/0:0,-8.12237,-95.4946:81:PASS:186:363:175:2:31:0:27:0
Chr02	14496997	14515602	DEL00025615	18605	0.940678	0	0.059322	0	PASS	PRECISE	DEL	60	-4,4	-4,4	CCACTGATCGTTGAACGGATGGATGATTTGATGATGTAACTGGGAGGAAGTAGCATTGGTTTCGTCTGCTACCAAAAAAAGCGTGTCAGTAGGTACAATATCAACTGTGATGTCTTGGTGAGCCAGGGCTTGATTGTTGCGGAGGAAAACTGTCAGTGTGGCAGCTTACATCTGTTGTTCGTCAGCATTGAGATGAATCGCAGCGAGCGTTTGG	1/1:-25.8992,-2.10639,0:21:PASS:370:28:264:0:0:3:0:7	1/1:-128.679,-11.4185,0:114:PASS:1735:106:1283:0:0:44:0:38	1/1:-99.5922,-8.72202,0:87:PASS:1798:105:1463:0:0:33:0:29	1/1:-95.6919,-8.42073,0:84:PASS:1519:121:1211:0:0:35:0:28	1/1:-34.2993,-2.70859,0:27:PASS:543:39:346:0:0:8:0:9	1/1:-125.996,-10.5321,0:105:PASS:1290:136:1027:0:0:31:0:35	1/1:-90.3973,-7.52306,0:75:PASS:1352:167:1012:0:0:16:0:25	1/1:-94.1967,-7.8235,0:78:PASS:1730:130:1308:0:0:20:0:26	0/0:0,-12.0322,-138.691:120:PASS:1686:3158:1684:2:67:2:40:0	0/0:0,-1.50476,-18.8996:15:PASS:426:546:351:1:10:0:5:0	1/1:-153.187,-13.232,0:132:PASS:2092:152:1628:0:0:40:0:44	1/1:-169.889,-14.7395,0:147:PASS:2128:145:1597:0:0:41:0:49	1/1:-178.695,-14.4441,0:144:PASS:3552:377:3006:0:0:76:0:48	1/1:-30.9995,-2.40772,0:24:PASS:456:33:332:0:0:12:0:8	1/1:-92.0672,-7.99505,0:80:PASS:1928:139:1434:0:0:29:0:27	0/0:0,-6.01804,-71.2974:60:PASS:1019:1631:884:2:32:0:20:0	0/0:0,-7.21994,-84.0952:72:PASS:964:1627:780:2:34:1:24:0	0/0:0,-4.81223,-57.0957:48:PASS:1025:1696:802:2:34:0:16:0	0/0:0,-12.6343,-151.991:126:PASS:1624:2175:888:2:38:0:42:0	0/0:0,-6.61863,-78.496:66:PASS:1084:1855:854:2:41:0:22:0	0/0:0,-9.62938,-115.896:96:PASS:1200:2650:1000:2:53:0:32:0	0/0:0,-7.21668,-80.092:72:PASS:1143:1907:1109:2:45:1:24:0	0/0:0,-5.94249,-67.4219:59:PASS:1139:1920:765:2:39:0:20:0	0/0:0,-6.01367,-68.8931:60:PASS:987:1680:751:2:36:0:20:0	0/0:0,-5.71553,-68.196:57:PASS:1024:1602:870:2:31:1:19:0	0/0:0,-5.11364,-59.2961:51:PASS:754:1367:728:2:25:0:17:0	0/0:0,-7.22165,-86.7969:72:PASS:2219:3878:2062:2:36:74:24:0	0/0:0,-2.70837,-32.9991:27:PASS:713:1547:875:2:17:0:9:0	0/0:0,-6.01804,-71.9974:60:PASS:1009:1797:835:2:37:0:20:0	0/0:0,-9.02525,-105.194:90:PASS:1015:1711:921:2:44:0:30:0	0/0:0,-5.71697,-67.9974:57:PASS:777:1380:755:2:28:0:19:0	0/0:0,-6.3172,-73.8956:63:PASS:894:1690:785:2:30:0:21:0	0/0:0,-6.91955,-81.7959:69:PASS:1063:1843:923:2:38:0:23:0	0/0:0,-4.21254,-50.3981:42:PASS:839:1512:814:2:31:0:14:0
Chr02	16338339	16339526	DUP00014752	1187	0.944915	0.0550847	0	0	PASS	PRECISE	DUP	60	-7,7	-7,7	ATTTGTCTGCTGTCCAGCAGTGACTAAGATTTAAGAAATGCTAGCTGCATAAAGAATGACATCATTTTTCATGATGTTCATAAAGAAATGCTAGCTGCATAAAGAATATCATTTTAATGTTATTTATATCTGATTAATTGTCCATGAGCAATTTTGTTTTCTATTGCAAACAGTGAAGAAAAAAAATATCTCATTTTCACACTTTAATGTCCCTCTATTTCAGA	0/1:-22.1836,0,-33.5829:10000:PASS:25:88:34:3:18:13:10:7	0/1:-83.1519,0,-78.1478:10000:PASS:99:346:92:4:43:53:27:27	0/1:-133.821,0,-114.836:10000:PASS:112:417:112:4:52:54:38:43	0/1:-168.315,0,-93.5756:10000:PASS:114:417:80:4:41:71:33:54	0/1:-15.1854,0,-33.6848:152:PASS:39:124:31:4:16:11:10:5	0/1:-71.7546,0,-67.2548:10000:PASS:65:311:58:5:24:15:23:24	0/1:-69.2497,0,-84.5498:10000:PASS:77:299:63:4:24:24:28:24	0/1:-119.121,0,-129.923:10000:PASS:106:395:104:4:51:42:42:39	0/0:0,-13.541,-164.795:135:PASS:133:209:99:2:63:0:45:0	0/0:0,-2.10671,-26.7995:21:PASS:37:58:33:2:19:0:7:0	0/1:-142.131,0,-102.823:10000:PASS:108:444:110:4:41:49:35:45	0/1:-177.889,0,-168.491:10000:PASS:132:540:119:4:64:76:55:59	0/1:-147.907,0,-168.201:10000:PASS:232:830:206:4:99:96:53:47	0/1:-10.7842,0,-42.2837:108:PASS:46:136:31:4:21:16:12:4	0/1:-177.798,0,-151.996:10000:PASS:137:504:111:4:58:68:51:58	0/0:0,-8.42484,-99.696:84:PASS:73:152:66:2:34:0:28:0	0/0:0,-6.31905,-75.3974:63:PASS:71:155:53:3:39:0:21:0	0/0:0,-6.31612,-72.9945:63:PASS:67:115:39:2:33:0:21:0	0/0:0,-10.8332,-130.896:108:PASS:99:238:91:3:34:0:36:0	0/0:0,-9.32788,-111.196:93:PASS:56:126:59:2:39:0:31:0	0/0:0,-9.929,-118.495:99:PASS:88:224:83:3:50:0:33:0	0/0:0,-7.51906,-86.6933:75:PASS:100:170:73:2:46:0:25:0	0/0:0,-7.22236,-89.5976:72:PASS:47:118:52:2:29:0:24:0	0/0:0,-8.12461,-97.2968:81:PASS:72:122:59:2:36:0:27:0	0/0:0,-8.72515,-103.495:87:PASS:94:179:75:2:40:0:29:0	0/0:0,-5.41616,-64.4976:54:PASS:56:112:48:2:26:0:18:0	0/0:0,-17.4514,-210.892:10000:PASS:176:341:146:2:84:0:58:0	0/0:0,-7.8195,-92.0927:78:PASS:48:137:68:2:36:0:26:0	0/0:0,-7.22003,-83.6953:72:PASS:66:132:64:2:36:0:24:0	0/0:0,-7.21971,-84.895:72:PASS:80:141:77:2:42:0:24:0	0/0:0,-8.42315,-98.1943:84:PASS:57:136:68:2:36:0:28:0	0/0:0,-6.921,-83.1973:69:PASS:58:134:52:2:39:0:23:0	0/0:0,-8.72589,-104.096:87:PASS:69:159:71:2:43:0:29:0	0/0:0,-7.82094,-91.5942:78:PASS:77:137:61:2:29:0:26:0
Chr02	16427573	16431831	DEL00026599	4258	0.991525	0.00847458	0	0	PASS	PRECISE	DEL	60	-10,10	-10,10	ATTTGTCTCTCTCTCAAAACCAAGGAAATCCTTGGTCACCTTGCCAAAATTCAAACCATTTTTCCAAGGATCGAACATTTTGGTCCATCCTATTCACATAGCTTGAGAGGCCAATATGGATCGAATTTTATGTTTCATTTAATGTGATTGTAGTTGGAATAGTGCATCAGTTTTTT	0/0:0,-2.70871,-34.8994:27:PASS:55:133:73:2:20:0:9:0	0/0:0,-9.92645,-116.892:99:PASS:286:661:295:2:58:0:33:0	0/0:0,-12.0355,-146.194:120:PASS:296:692:327:2:70:0:40:0	0/0:0,-11.1302,-130.392:111:PASS:296:773:327:2:58:0:37:0	0/0:0,-2.1068,-27.1996:21:PASS:94:179:92:2:23:0:7:0	0/0:0,-7.22189,-85.7972:72:PASS:273:572:241:2:32:2:24:0	0/0:0,-7.82405,-94.2973:78:PASS:253:617:229:3:33:2:26:0	0/0:0,-12.6379,-152.095:126:PASS:293:617:311:2:55:0:42:0	0/0:0,-15.0452,-181.994:150:PASS:341:769:361:2:66:0:50:0	0/0:0,-2.1068,-27.1996:21:PASS:62:138:86:2:18:0:7:0	0/0:0,-10.8096,-127.173:108:PASS:363:799:383:2:57:0:36:0	0/0:0,-15.346,-184.193:154:PASS:372:748:381:2:72:0:51:0	0/0:0,-12.035,-149.394:120:PASS:632:1469:703:2:98:0:40:0	0/0:0,-1.5048,-19.1996:15:PASS:63:141:71:2:16:0:5:0	0/0:0,-12.3325,-144.29:123:PASS:332:711:356:2:70:0:41:0	0/0:0,-6.61626,-75.7936:66:PASS:192:434:221:2:47:0:22:0	0/0:0,-7.21868,-84.794:72:PASS:215:423:194:2:41:0:24:0	0/0:0,-7.2206,-86.4959:72:PASS:141:436:181:3:36:0:24:0	0/0:0,-12.0369,-146.196:120:PASS:307:665:283:2:51:0:40:0	0/0:0,-5.02566,-97.0959:50:PASS:205:422:217:2:40:1:28:1	0/0:0,-11.4339,-135.495:114:PASS:170:672:300:3:54:0:38:0	0/0:0,-9.92362,-112.39:99:PASS:233:499:284:2:60:0:33:0	0/0:0,-5.41679,-66.9983:54:PASS:160:476:233:2:29:0:18:0	0/0:0,-5.71648,-68.1969:57:PASS:143:334:176:2:35:0:19:0	0/0:0,-8.11997,-95.3922:81:PASS:193:392:201:2:47:0:27:0	0/0:0,-7.82084,-90.8941:78:PASS:154:347:179:2:34:0:26:0	0/0:0,-20.4618,-246.892:10000:PASS:425:1013:494:2:95:0:68:0	0/0:0,-6.61948,-78.1968:66:PASS:173:398:200:2:39:0:22:0	0/0:0,-6.0163,-69.4957:60:PASS:167:425:197:2:42:0:20:0	0/0:0,-7.22067,-84.696:72:PASS:177:433:220:2:40:0:24:0	0/0:0,-4.81411,-57.5976:48:PASS:121:326:138:3:33:1:16:0	0/0:0,-6.61932,-79.7967:66:PASS:139:414:172:3:41:0:22:0	0/0:0,-7.22093,-85.4962:72:PASS:198:405:222:2:51:0:24:0	0/0:0,-5.71605,-68.3965:57:PASS:180:388:194:2:35:2:19:0
Chr02	20159641	20196560	DEL00028315	36919	0.436441	0.563559	0	0	PASS	PRECISE	DEL	33	-3,3	-3,3	CTAGGTGAAGACGTACGGTCTTGGGTGAATGTCTCTTCCTACAAAGTGTCAACAACCATATTACATAATACATTAGCAAAAACTTTATTATTATTGTTGTAGCTGACATTCTCAGAAATCGTCACAGAAATTTCGTCATAGATTAGAAGGTTTCTTGTAGTGTTTGTTGTTTCTTCATCCTCCAATAATTACAAATACTAGCTTCCAGGACTTTGAGTCTGGCG	0/1:-9.78505,0,-35.0182:98:PASS:279:670:415:2:13:3:10:5	0/1:-50.327,0,-151.496:10000:PASS:1375:4225:2480:2:53:40:49:31	0/1:-88.144,0,-190.8:10000:PASS:1262:3838:2507:2:59:41:64:47	0/1:-80.119,0,-155.813:10000:PASS:1400:4432:2402:2:54:27:52:42	0/1:-15.781,0,-43.4063:157:PASS:379:989:568:2:16:8:13:7	0/1:-39.7197,0,-112.616:10000:PASS:1100:2883:1693:2:35:13:38:21	0/1:-53.4325,0,-137.98:10000:PASS:1156:2663:1751:2:36:13:44:27	0/1:-66.7088,0,-224.485:10000:PASS:1259:3647:2350:2:68:33:73:35	0/1:-97.4031,0,-149.08:10000:PASS:1128:3841:2559:2:48:30:49:52	0/1:-1.79502,0,-14.4951:18:PASS:234:667:498:2:10:6:4:1	0/1:-105.052,0,-199.721:10000:PASS:1508:4872:2973:2:67:43:66:50	0/1:-106.184,0,-239.092:10000:PASS:1592:4791:2921:2:76:43:78:55	0/1:-75.7687,0,-225.279:10000:PASS:3066:8935:4692:2:113:120:71:35	0/1:-24.1422,0,-15.7257:157:PASS:303:775:470:2:12:10:6:10	0/1:-94.693,0,-204.151:10000:PASS:1426:4254:2594:2:71:48:69:49	0/0:0,-10.5267,-123.391:105:PASS:1846:2642:1250:2:49:0:35:0	0/0:0,-8.89911,-104.568:89:PASS:1695:2846:1168:2:50:0:30:0	0/1:-38.4404,0,-137.155:10000:PASS:1871:3632:1240:2:59:7:43:21	0/1:-88.6175,0,-143.045:10000:PASS:952:1952:2080:1:41:18:46:40	0/1:-76.3089,0,-78.3382:10000:PASS:667:2138:1434:2:32:15:28:33	0/1:-26.5937,0,-172.027:10000:PASS:2679:4787:1962:2:63:9:56:20	0/0:0,-12.5898,-145.147:126:PASS:2107:3050:1364:2:65:1:42:0	0/1:-34.7529,0,-113.471:10000:PASS:536:2935:1433:3:28:9:36:18	0/1:-24.934,0,-130.259:10000:PASS:1804:3636:1257:2:50:11:43:17	0/0:0,-11.109,-129.171:111:PASS:1764:2765:1189:2:36:0:37:0	0/0:0,-7.81657,-89.5898:78:PASS:1508:2346:954:2:35:7:26:0	0/0:0,-35.2019,-420.581:10000:PASS:4639:7905:3389:2:147:25:117:0	0/0:0,-8.12442,-97.9966:81:PASS:1763:2870:1204:2:47:0:27:0	0/1:-26.8526,0,-150.966:10000:PASS:2004:3472:1326:2:59:7:50:17	0/0:0,-8.71912,-102.689:87:PASS:1955:2654:1339:2:47:0:29:0	0/1:-35.2407,0,-113.941:10000:PASS:1588:2520:1130:2:47:10:36:26	0/0:0,-5.52329,-87.9987:55:PASS:1753:3176:1171:2:36:0:25:1	0/0:0,-12.3348,-147.693:123:PASS:1854:3682:1294:2:66:1:41:0	0/0:0,-7.42513,-86.9994:74:PASS:1638:2501:1080:2:38:0:25:0
Chr02	21646798	25262574	INV00038134	3615776	0.542373	0.457627	0	0	PASS	PRECISE	INV	35	-1,1	-1,1	ACGCCGCGCGAACCGCACCAGGGCGATCACCCAAACAGGAGCTAAGCAGATTCTCCCGGGTCGTGTGTCCGACGCTGGGAATCCGATCAGCCGATTTCTAGCGCCAACAATAGTGTCTCTAGGATTTCTCATGATAGGGTTTTTTTCCTTGACTCTGAGTAGTGGGAGGAATTGCAT	0/1:-4.39956,0,-21.1888:44:PASS:38408:91839:44130:2:7:1:9:2	0/1:-74.3919,0,-191.686:10000:PASS:222812:469526:224865:2:27:14:96:35	0/1:-74.0761,0,-147.138:10000:PASS:220074:490548:235424:2:21:6:73:32	0/1:-78.9344,0,-144.993:10000:PASS:216369:447476:210252:2:16:14:81:34	0/1:-5.12882,0,-14.9909:51:PASS:51032:125146:61273:2:5:1:7:2	0/1:-70.0461,0,-161.995:10000:PASS:188795:370358:178044:2:7:10:79:29	0/1:-79.6969,0,-123.198:10000:PASS:187138:372041:179290:2:6:10:76:33	0/1:-71.6219,0,-151.293:10000:PASS:215345:464230:221866:2:16:11:83:31	0/0:0,-26.5431,-187.54:10000:PASS:244490:539390:273075:2:20:3:100:0	0/0:0,-2.27904,-24.3708:23:PASS:43753:108049:56126:2:5:0:8:0	0/1:-127.063,0,-218.511:10000:PASS:271343:586583:282762:2:24:15:119:53	0/1:-105.113,0,-157.278:10000:PASS:251906:552898:268821:2:18:18:93:44	0/1:-89.7153,0,-211.572:10000:PASS:460013:1023873:495264:2:61:11:104:38	0/0:0,-2.098,-24.3908:21:PASS:42933:105290:51886:2:5:0:7:0	0/1:-65.2594,0,-148.694:10000:PASS:222925:494993:241660:2:18:11:84:30	0/1:-66.7161,0,-56.257:10000:PASS:121836:298939:149167:2:13:5:30:26	0/1:-59.5991,0,-52.4509:10000:PASS:119712:280848:137609:2:13:3:28:24	0/0:0,-14.1302,-133.78:141:PASS:128357:267656:140014:2:29:1:49:0	0/0:0,-20.0361,-191.863:10000:PASS:175502:424730:227543:2:34:7:71:0	0/0:0,-13.2701,-101.422:133:PASS:127478:298176:146385:2:14:0:47:0	0/0:0,-12.8029,-118.556:128:PASS:160495:370622:210652:2:30:0:46:0	0/0:0,-17.5457,-172.882:10000:PASS:144745:355918:166050:2:47:0:62:0	0/0:0,-15.1376,-146.184:151:PASS:124613:274732:154480:2:22:1:52:0	0/0:0,-13.6061,-118.157:136:PASS:121412:257455:134884:2:25:2:48:0	0/1:-33.4848,0,-95.4459:10000:PASS:117593:295698:145685:2:21:3:41:14	0/1:-42.5299,0,-42.4802:10000:PASS:98594:237472:113068:2:9:2:27:17	0/0:0,-38.8248,-371.787:10000:PASS:336700:700712:356646:2:76:6:134:0	0/1:-58.1445,0,-66.346:10000:PASS:123378:283253:143562:2:13:13:36:22	0/0:0,-17.4456,-153.183:10000:PASS:132880:276247:145139:2:28:1:61:0	0/1:-61.2552,0,-81.6173:10000:PASS:128112:302513:146860:2:12:3:41:25	0/0:0,-8.10672,-70.4769:81:PASS:112367:235230:125273:2:28:1:29:0	0/0:0,-12.6429,-107.098:126:PASS:123250:258303:136946:2:29:0:44:0	0/0:0,-16.2163,-144.858:10000:PASS:146986:306560:148374:2:43:1:57:0	0/1:-57.647,0,-79.0446:10000:PASS:112443:266975:129728:2:11:10:40:22
Chr02	23967523	23982499	DEL00029989	14976	0.987288	0	0.0127119	0	PASS	PRECISE	DEL	60	-3,3	-3,3	CCTACAACTGCAAAACAAGGTAGCTCTTATATGCAAAATAGAAATGTGGCAAGGTATCAACCATCATATCCAAAAGTACTTCAGCATGGAAACAAGTTTTTAGTACGGCACCTTGCCTAATCCTTCTGATTTACCAACTAGACTCCACGACCACAACATGTATGGCCGTGTCTGGTGTGTTTATCCAACCAGAAAC	0/0:0,-1.50388,-18.5987:15:PASS:296:390:205:2:14:0:5:0	0/0:0,-12.937,-152.793:129:PASS:1222:2010:1373:2:70:0:43:0	0/0:0,-13.8329,-162.686:138:PASS:1444:2086:1208:2:65:0:46:0	0/0:0,-8.12377,-97.096:81:PASS:1107:1814:1222:2:49:0:27:0	0/0:0,-1.8054,-22.7992:18:PASS:451:570:296:2:21:0:6:0	0/0:0,-10.2314,-123.196:102:PASS:962:1435:1155:1:28:0:34:0	0/0:0,-7.82372,-93.2969:78:PASS:913:1517:1178:1:29:1:26:0	0/0:0,-10.2303,-122.895:102:PASS:1298:2000:1168:2:51:1:34:0	0/0:0,-12.9363,-153.192:129:PASS:1416:2458:1555:2:64:0:43:0	0/0:0,-1.50491,-19.7998:15:PASS:381:551:254:2:22:0:5:0	0/0:0,-15.3467,-189.294:154:PASS:1586:2551:1719:2:65:1:51:0	0/0:0,-15.044,-177.892:150:PASS:1597:2450:1419:2:74:0:50:0	0/0:0,-14.4451,-181.896:144:PASS:2737:4658:2929:2:111:0:48:0	0/0:0,-2.10679,-27.2996:21:PASS:392:437:258:1:17:0:7:0	0/0:0,-12.9383,-154.394:129:PASS:1500:2194:1266:2:71:0:43:0	0/0:0,-8.72474,-101.695:87:PASS:879:1349:804:2:45:0:29:0	0/0:0,-7.22149,-85.6968:72:PASS:798:1247:764:2:36:0:24:0	0/0:0,-7.82216,-91.7954:78:PASS:741:1231:786:2:47:0:26:0	0/0:0,-14.7445,-177.294:147:PASS:1504:2433:1112:2:56:0:49:0	0/0:0,-9.32877,-113.497:93:PASS:793:1332:1488:1:49:0:31:0	0/0:0,-12.0127,-140.972:120:PASS:1127:1999:1201:2:62:1:40:0	0/0:0,-10.1771,-113.842:102:PASS:942:1737:957:2:62:0:34:0	0/0:0,-9.02429,-107.793:90:PASS:924:1618:1115:2:45:0:30:0	0/0:0,-7.82103,-92.0943:78:PASS:684:1195:719:2:44:0:26:0	0/0:0,-10.2287,-121.294:102:PASS:941:1293:723:2:47:0:34:0	0/0:0,-8.4153,-95.8865:84:PASS:666:1047:571:2:36:0:28:0	1/1:-221.462,-18.626,0:10000:PASS:1901:66:1976:0:0:93:0:62	0/0:0,-6.61814,-78.4955:66:PASS:791:1271:766:2:40:0:22:0	0/0:0,-8.12442,-98.3966:81:PASS:759:1293:738:2:44:1:27:0	0/0:0,-8.72686,-106.097:87:PASS:938:1354:827:2:56:0:29:0	0/0:0,-7.22107,-86.7963:72:PASS:721:1053:593:2:40:0:24:0	0/0:0,-7.82413,-95.3973:78:PASS:694:1250:832:2:47:0:26:0	0/0:0,-6.01442,-71.6938:60:PASS:866:1393:817:2:37:1:20:0	0/0:0,-5.11426,-59.7968:51:PASS:778:1246:635:2:29:0:17:0
Chr02	27302316	27304245	DUP00017637	1929	0.991525	0.00847458	0	0	PASS	PRECISE	DUP	60	-9,9	-9,9	CAGTTGTCACAAACTTTGTGACATTGTTCTGGCATTCTATGGCTATACCAGAGAATGTACACGGAATTCTGCACGCTACAGAAGATCTTAATTTAAATCATTCATAACTCAAAGAGTTCAGATCCTAAAATTATTCCTTGTCAACAACATCATATACTGGTACAACATGGTCAAGTGATTAGCAGTAACACATACTAATTCTAAGTAAAATTTGCAACAATC	0/0:0,-1.50487,-19.4997:15:PASS:38:89:32:3:18:0:5:0	0/0:0,-12.0353,-143.994:120:PASS:176:314:154:2:62:0:40:0	0/0:0,-12.6382,-154.295:126:PASS:180:368:178:2:73:0:42:0	0/0:0,-9.92883,-119.095:99:PASS:174:299:156:2:57:0:33:0	0/0:0,-4.20811,-52.2937:42:PASS:63:133:49:2:24:0:14:0	0/0:0,-6.92073,-81.597:69:PASS:129:225:139:2:31:0:23:0	0/0:0,-9.62906,-114.896:96:PASS:113:256:128:2:37:0:32:0	0/0:0,-11.1314,-131.793:111:PASS:161:366:150:2:65:0:37:0	0/0:0,-12.6383,-153.395:126:PASS:184:394:171:2:61:0:42:0	0/0:0,-2.40778,-31.1995:24:PASS:57:117:36:3:22:0:8:0	0/0:0,-14.445,-179.496:144:PASS:193:386:229:2:71:0:48:0	0/0:0,-17.749,-212.488:10000:PASS:236:433:215:2:90:0:59:0	0/0:0,-15.0462,-190.195:150:PASS:346:694:346:2:133:0:50:0	0/0:0,-2.4077,-30.9995:24:PASS:38:103:46:2:20:0:8:0	0/0:0,-14.4434,-173.794:144:PASS:210:392:179:2:73:0:48:0	0/0:0,-7.22029,-85.5956:72:PASS:132:256:98:2:48:0:24:0	0/0:0,-8.72077,-98.3909:87:PASS:88:212:104:2:51:0:29:0	0/0:0,-5.71723,-68.7977:57:PASS:94:188:99:2:38:0:19:0	0/0:0,-13.2409,-161.696:132:PASS:163:320:204:2:47:0:44:0	0/0:0,-5.7171,-68.4975:57:PASS:104:216:85:2:35:0:19:0	0/0:0,-10.2221,-120.387:102:PASS:155:259:171:2:53:0:34:0	0/0:0,-7.82244,-91.4957:78:PASS:133:299:114:2:53:0:26:0	0/0:0,-8.12382,-100.396:81:PASS:131:219:90:2:36:0:27:0	0/0:0,-6.92051,-82.0968:69:PASS:94:185:94:2:35:0:23:0	0/0:0,-8.72567,-103.296:87:PASS:148:251:120:2:49:0:29:0	0/0:0,-5.10961,-56.3921:51:PASS:91:189:88:2:35:0:17:0	0/0:0,-17.7526,-212.392:10000:PASS:275:515:227:2:97:0:59:0	0/0:0,-2.10558,-24.0984:21:PASS:83:13:0:0:4:0:7:0	0/0:0,-6.31811,-74.4965:63:PASS:105:231:105:2:39:0:21:0	0/0:0,-6.61804,-77.5954:66:PASS:128:246:104:2:43:0:22:0	0/0:0,-7.522,-89.4963:75:PASS:89:202:90:2:40:0:25:0	0/0:0,-7.22237,-88.1977:72:PASS:116:213:111:2:42:0:24:0	0/0:0,-7.22198,-87.2973:72:PASS:141:240:117:2:44:0:24:0	0/0:0,-7.22206,-87.7973:72:PASS:109:211:95:2:39:0:24:0
Chr02	28633807	28637771	DEL00031966	3964	0.978814	0	0.0211864	0	PASS	PRECISE	DEL	60	-4,4	-4,4	ACCATAAGCTATACTGTTTTGAAAAAAGGATAACGAATAATATCGTGCATAGCATGGTGAATGACCGTTACAGTGTTTCTCTATTTTATTACAGCAATCAAACTTGCATTTCGTTTGCAATTTACATAAGAAATGCCATGCCAATAATCCAATTGTTTGCTATCTCTGTTTGTTTAGTGATCGTCGTACGGTGCAAGCA	0/0:0,-1.80573,-22.6996:18:PASS:37:90:61:2:10:0:6:0	0/0:0,-11.128,-129.59:111:PASS:187:565:321:2:59:0:37:0	0/0:0,-8.72215,-101.792:87:PASS:157:508:280:2:41:0:29:0	0/0:0,-11.1291,-129.391:111:PASS:195:511:295:2:47:0:37:0	0/0:0,-2.10662,-26.1994:21:PASS:50:119:66:2:11:0:7:0	0/0:0,-8.42572,-100.897:84:PASS:181:426:242:2:31:0:28:0	0/0:0,-9.32862,-112.097:93:PASS:167:441:245:2:38:0:31:0	0/0:0,-8.72407,-101.894:87:PASS:166:544:261:3:47:0:29:0	0/0:0,-11.1323,-132.294:111:PASS:266:620:324:2:53:0:37:0	0/0:0,-1.80578,-23.2996:18:PASS:57:126:60:2:8:0:6:0	0/0:0,-12.9345,-150.09:129:PASS:207:686:386:2:67:0:43:0	0/0:0,-9.62563,-112.793:96:PASS:227:631:392:2:55:0:32:0	0/0:0,-15.0465,-188.195:150:PASS:393:1236:631:2:99:0:50:0	0/0:0,-1.50486,-19.3997:15:PASS:38:113:67:2:9:0:5:0	0/0:0,-12.3377,-150.495:123:PASS:194:577:339:2:61:0:41:0	0/0:0,-7.51945,-85.5937:75:PASS:158:353:180:2:33:0:25:0	0/0:0,-6.31707,-72.6954:63:PASS:161:370:167:2:29:0:21:0	0/0:0,-5.4166,-65.5981:54:PASS:176:318:169:2:33:0:18:0	0/0:0,-9.92955,-118.796:99:PASS:248:546:270:2:41:0:33:0	0/0:0,-2.71821,-67.7967:27:PASS:134:318:188:2:34:3:20:1	0/0:0,-9.32669,-110.495:93:PASS:253:446:221:2:48:0:31:0	0/0:0,-7.8223,-91.9955:78:PASS:186:413:240:2:52:0:26:0	0/0:0,-6.91769,-79.094:69:PASS:145:321:180:2:30:0:23:0	0/0:0,-4.21187,-48.9974:42:PASS:149:326:128:2:24:0:14:0	0/0:0,-8.4248,-100.696:84:PASS:190:402:203:2:39:2:28:0	0/0:0,-7.81972,-92.8929:78:PASS:125:271:277:1:33:0:26:0	0/0:0,-13.8396,-164.092:138:PASS:432:921:419:2:75:1:46:0	0/0:0,-5.71724,-68.4977:57:PASS:148:339:190:2:29:0:19:0	0/0:0,-5.71416,-66.2946:57:PASS:150:361:163:2:35:0:19:0	0/0:0,-6.62067,-81.198:66:PASS:137:329:234:2:36:1:22:0	0/0:0,-5.40981,-64.1913:54:PASS:120:274:152:2:32:0:18:0	0/0:0,-7.22192,-87.2972:72:PASS:154:358:169:2:35:0:24:0	0/0:0,-7.52225,-88.7965:75:PASS:182:403:192:2:36:0:25:0	0/0:0,-7.21697,-85.9923:72:PASS:127:330:174:2:25:1:24:0
Chr02	29100487	29101778	DUP00017913	1291	0.978814	0.0211864	0	0	PASS	PRECISE	DUP	60	-4,4	-4,4	TTATGAATATGGTATTCACAGTACCAAACTTTATAATAATATACCATAAATCTTAAGTGTTACTGAATTTGCAACATCTTCAGCAGAATAAATGCAGTATTTCTAGCACATCTTGCAAACAATGTTACTTAAATAAGGGCTAGTTGGAATCATGCCATTACAATTCTCAATAATTGGAAATTTGCCATCA	0/0:0,-2.10593,-25.2987:21:PASS:32:67:38:2:17:0:7:0	0/0:0,-12.6362,-151.293:126:PASS:118:224:105:2:69:0:42:0	0/0:0,-15.6471,-189.694:157:PASS:127:279:131:2:78:0:52:0	0/0:0,-9.62792,-116.395:96:PASS:121:202:103:2:53:0:32:0	0/0:0,-1.80583,-23.2996:18:PASS:49:78:40:2:24:0:6:0	0/0:0,-9.9303,-119.196:99:PASS:86:152:75:2:37:0:33:0	0/0:0,-10.832,-128.895:108:PASS:93:172:95:2:41:0:36:0	0/0:0,-14.443,-175.394:144:PASS:143:241:115:2:61:0:48:0	0/0:0,-13.5395,-162.393:135:PASS:133:282:124:2:66:0:45:0	0/0:0,-2.10679,-27.0996:21:PASS:33:90:39:3:20:0:7:0	0/0:0,-14.1433,-174.395:141:PASS:145:254:132:2:78:0:47:0	0/0:0,-14.7429,-178.492:147:PASS:129:275:140:2:72:0:49:0	0/0:0,-17.1514,-213.993:10000:PASS:242:507:245:2:130:0:57:0	0/0:0,-3.0097,-38.7994:30:PASS:41:69:45:2:22:0:10:0	0/0:0,-16.5492,-201.092:10000:PASS:141:240:128:2:77:0:55:0	0/0:0,-7.82284,-92.6961:78:PASS:107:163:104:2:56:0:26:0	0/0:0,-8.42436,-99.1955:84:PASS:90:138:66:2:41:0:28:0	0/0:0,-8.72359,-101.094:87:PASS:72:162:73:2:54:0:29:0	0/0:0,-14.1415,-168.993:141:PASS:127:259:128:2:62:0:47:0	0/0:0,-7.52062,-87.7949:75:PASS:59:154:83:2:48:0:25:0	0/0:0,-15.3437,-182.691:154:PASS:82:214:129:2:61:0:51:0	0/0:0,-8.72417,-101.794:87:PASS:117:182:84:2:52:0:29:0	0/0:0,-10.2309,-124.296:102:PASS:74:169:70:2:46:0:34:0	0/0:0,-9.92704,-116.593:99:PASS:69:155:75:2:49:0:33:0	0/0:0,-11.4338,-136.595:114:PASS:81:195:84:2:56:0:38:0	0/0:0,-6.31666,-73.695:63:PASS:53:94:64:2:33:0:21:0	0/0:0,-14.1433,-172.195:141:PASS:156:325:160:2:92:0:47:0	0/0:0,-6.31767,-75.296:63:PASS:69:149:59:2:41:0:21:0	0/0:0,-8.12554,-100.398:81:PASS:62:148:69:2:50:0:27:0	0/0:0,-10.8321,-129.695:108:PASS:82:171:90:2:55:0:36:0	0/0:0,-8.42226,-101.293:84:PASS:61:150:70:2:41:0:28:0	0/0:0,-8.42353,-100.095:84:PASS:78:149:69:2:49:0:28:0	0/0:0,-7.51899,-88.6932:75:PASS:72:151:87:2:52:0:25:0	0/0:0,-7.22224,-88.0975:72:PASS:77:136:71:2:36:0:24:0
Chr02	32135275	32138109	DEL00033143	2834	0.995763	0	0.00423729	0	PASS	PRECISE	DEL	60	-5,5	-5,5	TTTTAATTGAGTCTCTTGATTATGATTCTACCCAAGTCACTTGATTTTTTTTAATTGAGTTCCTTTTTTATTCCTTGTAGTATCGTGTATTCAGGTCTGCTGAAGCTGATGGTTGTGTTAATAACTTTGTCATTGCTGCCTTTTGCTACCACTTGTTTTGCAAACCAAAAAGTCAACCAATTGATTCATAGCGCCATTACTTCTCCTCT	0/0:0,-1.50477,-19.0996:15:PASS:71:138:96:2:19:0:5:0	0/0:0,-11.726,-135.786:117:PASS:183:440:216:2:57:1:39:0	0/0:0,-12.3334,-147.191:123:PASS:241:540:277:2:63:0:41:0	0/0:0,-9.3274,-109.995:93:PASS:222:446:221:2:51:0:31:0	0/0:0,-3.3103,-42.499:33:PASS:83:174:98:2:16:1:11:0	0/0:0,-6.62024,-79.5976:66:PASS:127:332:138:3:22:0:22:0	0/0:0,-8.42587,-101.597:84:PASS:135:326:149:2:29:0:28:0	0/0:0,-12.3348,-147.193:123:PASS:248:490:198:2:48:0:41:0	0/0:0,-11.1296,-129.292:111:PASS:256:537:264:2:63:0:37:0	0/0:0,-1.50481,-19.1997:15:PASS:73:156:80:2:15:0:5:0	0/0:0,-13.2379,-156.193:132:PASS:250:565:294:2:53:0:44:0	0/0:0,-12.0346,-143.793:120:PASS:328:611:314:2:65:0:40:0	0/0:0,-12.9369,-158.593:129:PASS:528:1018:459:2:100:0:43:0	0/0:0,-3.0098,-39.4995:30:PASS:90:151:91:2:18:0:10:0	0/0:0,-18.3532,-217.49:10000:PASS:271:595:288:2:76:0:61:0	0/0:0,-9.62181,-109.589:96:PASS:191:377:216:2:44:0:32:0	0/0:0,-7.8231,-93.2963:78:PASS:164:341:167:2:45:0:26:0	0/0:0,-6.91885,-81.2952:69:PASS:132:292:150:2:30:0:23:0	0/0:0,-19.8591,-237.491:10000:PASS:269:574:365:2:44:0:66:0	0/0:0,-9.02663,-108.096:90:PASS:251:529:282:2:43:1:30:0	0/0:0,-9.62702,-112.894:96:PASS:186:485:283:2:38:0:32:0	0/0:0,-9.91675,-108.483:99:PASS:215:441:209:2:55:1:33:0	0/0:0,-9.9289,-118.295:99:PASS:124:345:197:2:40:0:33:0	0/0:0,-6.31502,-71.0934:63:PASS:125:296:140:2:26:0:21:0	0/0:0,-8.12421,-97.4964:81:PASS:202:370:211:2:42:0:27:0	0/0:0,-4.81315,-54.9967:48:PASS:131:250:133:2:23:0:16:0	1/1:-270.691,-22.2677,0:10000:PASS:351:1:455:0:0:107:0:74	0/0:0,-6.61828,-77.6956:66:PASS:161:286:162:2:29:0:22:0	0/0:0,-9.92605,-113.692:99:PASS:151:299:186:2:30:0:33:0	0/0:0,-7.82169,-91.0949:78:PASS:184:356:180:2:48:0:26:0	0/0:0,-6.01652,-69.6959:60:PASS:152:275:155:2:24:0:20:0	0/0:0,-6.3195,-76.8979:63:PASS:147:281:152:2:27:0:21:0	0/0:0,-9.62387,-108.791:96:PASS:154:341:193:2:54:0:32:0	0/0:0,-7.22051,-84.8958:72:PASS:162:296:143:2:36:0:24:0
Chr02	32439004	32445022	DEL00033261	6018	0.987288	0	0.0127119	0	PASS	PRECISE	DEL	60	-2,2	-2,2	AAACATTCTATAAAGATACACATAATTTTATTAGAATTTTTTTTTCATTATTTTATATTGAATAGCAGTTTTCTACATAACGTTCATGGTGAGCCAGTTGTGATGTGTCGAGTGGTGTTCATCCACGTTTCCTAGGTTGACCAGGGTCTTGACATCTCACTTCTGGATCTTCGGCTTTTCATCGGAGCCTGGTTAGGCTAATGTTCTACTCGTCTTCTTGAC	0/0:0,-1.80566,-22.5995:18:PASS:123:183:93:2:12:0:6:0	0/0:0,-10.5295,-123.893:105:PASS:471:865:638:2:46:0:35:0	0/0:0,-11.4219,-129.183:114:PASS:537:986:621:2:60:0:38:0	0/0:0,-12.0337,-140.393:120:PASS:421:847:565:2:50:0:40:0	0/0:0,-3.00688,-36.2966:30:PASS:142:274:133:2:21:0:10:0	0/0:0,-9.32811,-110.796:93:PASS:320:609:451:2:29:0:31:0	0/0:0,-8.42553,-100.597:84:PASS:359:644:515:1:27:0:28:0	0/0:0,-14.1373,-163.589:141:PASS:456:894:574:2:56:0:47:0	0/0:0,-13.2374,-155.392:132:PASS:606:1073:708:2:57:0:44:0	0/0:0,-2.70858,-34.1993:27:PASS:150:299:124:2:17:0:9:0	0/0:0,-13.2369,-154.092:132:PASS:540:1061:774:2:56:0:44:0	0/0:0,-13.8377,-159.69:138:PASS:567:1154:658:2:53:0:46:0	0/0:0,-16.0858,-200.43:10000:PASS:932:1800:1272:2:80:0:54:0	0/0:0,-2.40776,-30.9995:24:PASS:132:223:106:2:14:0:8:0	0/0:0,-12.0305,-138.889:120:PASS:522:977:581:2:58:0:40:0	0/0:0,-10.2219,-116.287:102:PASS:315:698:296:2:48:0:34:0	0/0:0,-8.12379,-96.096:81:PASS:301:609:310:2:41:0:27:0	0/0:0,-6.31845,-75.4968:63:PASS:287:540:308:2:43:0:21:0	0/0:0,-11.4274,-134.988:114:PASS:565:830:431:2:38:0:38:0	0/0:0,-5.71633,-67.6968:57:PASS:288:534:366:2:31:0:19:0	0/0:0,-6.92013,-82.3964:69:PASS:602:570:382:1:34:0:23:0	0/0:0,-9.91642,-111.882:99:PASS:351:792:397:2:64:0:33:0	0/0:0,-6.6176,-79.2949:66:PASS:410:466:329:1:31:0:22:0	0/0:0,-6.61919,-77.7965:66:PASS:254:454:325:2:33:1:22:0	0/0:0,-8.42548,-101.897:84:PASS:347:618:275:2:34:0:28:0	1/1:-91.3853,-8.11312,0:81:PASS:248:5:254:0:0:33:0:27	0/0:0,-21.3624,-257.389:10000:PASS:756:1544:862:2:82:1:71:0	0/0:0,-6.92009,-82.4964:69:PASS:315:579:327:2:30:0:23:0	0/0:0,-6.31972,-77.4981:63:PASS:328:511:344:2:35:0:21:0	0/0:0,-3.7221,-81.2964:37:PASS:336:601:357:2:43:1:24:1	0/0:0,-6.61916,-77.9965:66:PASS:270:483:255:2:29:0:22:0	0/0:0,-6.61807,-76.4954:66:PASS:292:529:311:2:27:0:22:0	0/0:0,-7.5224,-89.7966:75:PASS:348:692:363:2:43:0:25:0	0/0:0,-6.31627,-74.6946:63:PASS:293:613:283:2:38:0:21:0
Chr02	32930544	32934353	DEL00033401	3809	0.995763	0	0.00423729	0	PASS	PRECISE	DEL	54	-5,5	-5,5	TTAGTGTGTGCATGTGTGCAAGATTTCAAGCCAATCCTAAGAAATATCATTTGATGGCCCACTAAGTGAGTTTTGGTGTTGATGACATGTATAAGTAATGAACTAATGAATTTATCGAGAAATTAACAGGTACAAATGTTAAGAAATGGAAAAGTGCAAGAAAGGATCCC	0/0:0,-2.10678,-27.1996:21:PASS:73:116:71:2:18:0:7:0	0/0:0,-10.5323,-129.596:105:PASS:332:642:334:2:71:0:35:0	0/0:0,-13.2392,-160.694:132:PASS:312:674:337:2:74:0:44:0	0/0:0,-12.2252,-139.683:122:PASS:269:551:291:2:65:0:41:0	0/0:0,-2.40753,-30.1993:24:PASS:94:172:79:2:28:0:8:0	0/0:0,-7.82381,-93.797:78:PASS:235:500:219:2:33:3:26:0	0/0:0,-8.72643,-103.797:87:PASS:240:479:227:2:35:1:29:0	0/0:0,-12.6382,-154.195:126:PASS:318:680:342:2:66:0:42:0	0/0:0,-16.5469,-192.49:10000:PASS:357:710:357:2:71:1:55:0	0/0:0,-1.80581,-23.1996:18:PASS:67:125:77:2:13:0:6:0	0/0:0,-9.80012,-115.866:98:PASS:398:755:388:2:52:1:33:0	0/0:0,-16.8452,-200.288:10000:PASS:418:843:427:2:87:0:56:0	0/0:0,-17.1537,-215.595:10000:PASS:647:1329:674:2:126:0:57:0	0/0:0,-1.80513,-21.8989:18:PASS:67:139:67:2:16:0:6:0	0/0:0,-15.9425,-186.788:157:PASS:340:653:351:2:71:0:53:0	0/0:0,-9.01875,-102.188:90:PASS:244:436:174:2:50:0:30:0	0/0:0,-6.01366,-68.8931:60:PASS:182:408:173:2:43:0:20:0	0/0:0,-6.91705,-80.5934:69:PASS:173:375:181:2:39:0:23:0	0/0:0,-12.637,-151.494:126:PASS:305:603:350:2:42:0:42:0	0/0:0,-6.01826,-72.7977:60:PASS:200:393:185:2:36:1:20:0	0/0:0,-7.2213,-86.0966:72:PASS:243:352:183:2:32:0:24:0	0/0:0,-9.9242,-114.39:99:PASS:241:487:236:2:60:0:33:0	0/0:0,-6.61869,-78.796:66:PASS:173:335:178:2:30:0:22:0	0/0:0,-5.71568,-66.5961:57:PASS:193:373:178:2:34:1:19:0	0/0:0,-10.2278,-120.893:102:PASS:234:421:188:2:44:0:34:0	0/0:0,-7.21182,-78.3871:72:PASS:183:333:178:2:35:0:24:0	0/0:0,-20.4592,-245.989:10000:PASS:474:994:510:2:98:3:68:0	0/0:0,-7.52159,-87.8958:75:PASS:186:394:189:2:31:0:25:0	0/0:0,-9.02573,-105.995:90:PASS:203:415:223:2:49:0:30:0	0/0:0,-9.32628,-111.094:93:PASS:204:441:225:2:50:3:31:0	0/0:0,-9.62817,-114.795:96:PASS:148:344:181:2:46:0:32:0	0/0:0,-7.82185,-91.7951:78:PASS:196:384:162:2:39:0:26:0	0/0:0,-8.42201,-98.4932:84:PASS:214:406:226:2:44:0:28:0	0/0:0,-7.21699,-82.9923:72:PASS:194:359:163:2:40:0:24:0
Chr02	33883195	33891332	DEL00033687	8137	0.974576	0.0254237	0	0	PASS	PRECISE	DEL	60	-7,7	-7,7	TACACCTATCATGTGTGGTACATAGATCTGTCATTACTCACATGCCTGCACACACATGTATTCCACGCTAAATATTCGAAGTATAGCAGCTCATCTATCTTTATCACTTATCAGGCAGCCGAAGTTTTTGGGTGAATTGGTCGATGCATCGTACATGGACTCAGCTCTAACTTGTGCTGTTTATTTTTACGCAGGTGATTCCCTCCTTT	0/0:0,-1.80555,-22.0994:18:PASS:59:245:92:3:6:0:6:0	0/0:0,-10.2277,-117.993:102:PASS:474:1163:609:2:26:1:34:0	0/0:0,-14.1416,-167.293:141:PASS:345:1281:569:3:30:0:47:0	0/0:0,-10.8291,-127.492:108:PASS:414:1188:547:2:30:0:36:0	0/0:0,-1.50476,-18.9996:15:PASS:114:261:123:2:8:0:5:0	0/0:0,-8.12473,-96.9969:81:PASS:387:1133:469:3:17:0:27:0	0/0:0,-9.62897,-114.496:96:PASS:361:1144:455:3:18:0:32:0	0/0:0,-12.3353,-147.293:123:PASS:414:1246:562:3:31:0:41:0	0/0:0,-11.1219,-130.384:111:PASS:548:1888:683:3:51:1:37:0	0/0:0,-1.80553,-21.7993:18:PASS:108:317:131:3:9:0:6:0	0/0:0,-15.9481,-193.394:157:PASS:507:1649:691:3:35:0:53:0	0/0:0,-15.643,-182.389:157:PASS:478:1402:683:2:43:0:52:0	0/0:0,-19.2594,-239.194:10000:PASS:881:2407:1342:2:56:2:64:0	0/0:0,-1.80442,-21.3982:18:PASS:76:217:113:2:6:1:6:0	0/0:0,-10.8321,-129.295:108:PASS:393:1309:619:3:31:0:36:0	0/0:0,-6.01833,-72.3977:60:PASS:283:834:337:3:28:0:20:0	0/0:0,-6.31938,-76.1978:63:PASS:303:735:349:2:26:1:21:0	0/0:0,-5.71729,-68.2977:57:PASS:259:737:319:3:13:0:19:0	0/0:0,-6.9108,-80.6871:69:PASS:380:1148:645:2:32:0:23:0	0/1:-5.17344,0,-82.9698:52:PASS:330:734:379:2:20:4:26:4	0/0:0,-9.02685,-107.596:90:PASS:457:857:631:2:24:0:30:0	0/0:0,-9.2792,-105.747:93:PASS:412:1000:417:2:44:0:31:0	0/0:0,-5.11493,-61.2974:51:PASS:325:696:485:2:16:0:17:0	0/0:0,-5.11548,-61.598:51:PASS:255:653:314:2:13:0:17:0	0/0:0,-8.42414,-99.2953:84:PASS:295:804:404:2:31:0:28:0	0/0:0,-4.81282,-56.1963:48:PASS:252:661:256:3:20:1:16:0	0/0:0,-16.5506,-202.294:10000:PASS:713:2038:921:2:67:0:55:0	0/0:0,-6.31797,-73.7963:63:PASS:267:730:364:2:16:0:21:0	0/0:0,-7.52267,-90.2969:75:PASS:327:750:353:2:15:0:25:0	0/0:0,-7.22135,-85.8966:72:PASS:322:738:404:2:32:1:24:0	0/0:0,-4.51198,-53.9965:45:PASS:221:735:279:3:13:0:15:0	0/0:0,-7.52298,-90.8972:75:PASS:253:647:342:2:19:0:25:0	0/0:0,-6.31906,-76.1974:63:PASS:360:764:432:2:34:0:21:0	0/0:0,-5.41494,-63.9964:54:PASS:260:764:318:3:24:0:18:0
Chr02	34424163	34425857	DEL00033833	1694	0.974576	0.0254237	0	0	PASS	PRECISE	DEL	60	-5,5	-5,5	TTATTCTTCTAATCATCCACATCCTTGTCCATTCCACCATCCTCTCAATGTATCTCCATATAATAATGCCTCATATGCTCTGTAAATATTTTTCACAACTGAGACAATGTTCGACGAATATGCATACCTTGATGAACGACCACTCTTTCGAGATGCTCGGATCACGAGGCTCCTCTGACTCTGCAAAGTAAGCGGCCGGTGACCGTGGCTCAATGTTGTG	0/0:0,-3.00976,-39.1995:30:PASS:32:81:12:4:16:0:10:0	0/0:0,-12.0353,-142.494:120:PASS:143:278:141:2:64:0:40:0	0/0:0,-13.1302,-153.085:131:PASS:174:327:120:2:76:0:44:0	0/0:0,-9.31673,-105.485:93:PASS:132:272:107:2:53:0:31:0	0/0:0,-1.50484,-19.2997:15:PASS:38:113:20:4:17:0:5:0	0/0:0,-10.8329,-129.396:108:PASS:103:248:106:2:39:1:36:0	0/0:0,-11.4346,-136.595:114:PASS:108:233:110:2:46:0:38:0	0/0:0,-13.2385,-160.193:132:PASS:135:297:131:2:66:0:44:0	0/0:0,-16.23,-188.374:10000:PASS:181:390:128:3:75:0:54:0	0/0:0,-2.10681,-27.2996:21:PASS:32:79:25:3:13:0:7:0	0/0:0,-13.238,-157.493:132:PASS:160:318:172:2:72:0:44:0	0/0:0,-13.2391,-159.294:132:PASS:176:386:126:3:73:0:44:0	0/0:0,-13.2367,-161.791:132:PASS:310:577:244:2:122:0:44:0	0/0:0,-1.50468,-18.7995:15:PASS:30:80:20:3:18:0:5:0	0/0:0,-14.1379,-165.29:141:PASS:153:317:96:3:69:0:47:0	0/0:0,-7.82281,-91.796:78:PASS:104:203:74:2:40:0:26:0	0/0:0,-6.9161,-79.0924:69:PASS:63:178:58:3:41:0:23:0	0/0:0,-7.22173,-86.397:72:PASS:71:174:78:2:43:0:24:0	0/0:0,-11.7348,-140.495:117:PASS:167:316:113:2:47:0:39:0	0/1:-4.18318,0,-62.4766:42:PASS:85:171:79:2:36:2:20:3	0/0:0,-9.92995,-119.196:99:PASS:132:273:100:2:60:0:33:0	0/0:0,-8.71636,-99.1865:87:PASS:106:233:72:3:50:1:29:0	0/0:0,-8.12119,-97.7934:81:PASS:118:213:82:2:45:0:27:0	0/0:0,-5.41618,-64.5976:54:PASS:86:150:64:2:28:0:18:0	0/0:0,-6.91988,-82.0962:69:PASS:101:247:76:3:44:0:23:0	0/0:0,-6.61767,-76.995:66:PASS:75:159:60:2:38:0:22:0	0/0:0,-18.0499,-217.088:10000:PASS:200:460:183:2:103:0:60:0	0/0:0,-4.81404,-57.2976:48:PASS:96:180:72:2:41:0:16:0	0/0:0,-6.87521,-80.5515:69:PASS:86:185:72:2:39:0:23:0	0/0:0,-6.91892,-80.5952:69:PASS:98:194:83:2:41:0:23:0	0/0:0,-6.6201,-79.9974:66:PASS:72:164:54:3:34:0:22:0	0/0:0,-7.22182,-87.2971:72:PASS:81:180:86:2:49:0:24:0	0/0:0,-7.22042,-84.9957:72:PASS:77:212:81:3:46:0:24:0	0/0:0,-6.31667,-74.195:63:PASS:77:173:65:2:36:0:21:0
Chr02	35919465	36029128	DEL00034250	109663	0.978814	0.0211864	0	0	PASS	PRECISE	DEL	23	-2,2	-2,2	AGAGTTTCTAGATTAAGGATCCCCAATCCTCCATAATGATTTTACAAATTATGCTATAGTAAGTGTGCAATTTATCAACAGACCAGTTTGCCCATTCTTCTTGCCATGTCCCACATGATACCAAGTTCATCATGTA	0/0:0,-2.10666,-26.4994:21:PASS:1827:3214:1530:2:14:0:7:0	0/0:0,-11.1255,-129.587:111:PASS:8752:16256:8397:2:74:0:37:0	0/0:0,-12.9333,-153.289:129:PASS:9252:17374:8080:2:73:0:43:0	0/0:0,-9.62464,-113.792:96:PASS:7625:14387:7622:2:65:0:32:0	0/0:0,-2.40773,-30.9995:24:PASS:2695:4571:2184:2:24:0:8:0	0/0:0,-9.02773,-108.797:90:PASS:6669:12394:6542:2:37:0:30:0	0/0:0,-11.7358,-140.496:117:PASS:6687:12706:6497:2:45:2:39:0	0/0:0,-10.5275,-123.491:105:PASS:8665:15868:7782:2:64:0:35:0	0/0:0,-14.0075,-159.259:140:PASS:10431:16633:9381:2:73:0:47:0	0/0:0,-1.8058,-23.0996:18:PASS:2341:3492:1599:2:18:0:6:0	0/0:0,-15.0397,-175.388:150:PASS:11051:20479:10121:2:78:0:50:0	0/0:0,-14.4395,-170.39:144:PASS:10658:19396:9621:2:81:0:48:0	0/0:0,-14.4418,-179.292:144:PASS:19431:35178:18097:2:128:0:48:0	0/0:0,-2.40708,-29.8988:24:PASS:2170:3815:1786:2:20:0:8:0	0/0:0,-14.7378,-170.887:147:PASS:9477:17243:8483:2:83:0:49:0	0/0:0,-6.91811,-80.1944:69:PASS:6051:11223:5210:2:45:0:23:0	0/0:0,-8.42446,-99.0956:84:PASS:5411:8800:5034:2:46:0:28:0	0/0:0,-7.52147,-88.0957:75:PASS:5223:9568:4552:2:44:0:25:0	0/0:0,-11.7304,-138.79:117:PASS:10478:17427:8183:2:41:0:39:0	0/0:0,-6.45124,-74.2286:65:PASS:5965:10283:5131:2:38:0:22:0	0/0:0,-10.8277,-125.991:108:PASS:8930:15545:6855:2:60:0:36:0	0/0:0,-7.21599,-81.6913:72:PASS:6665:10697:5706:2:50:0:24:0	0/0:0,-7.22041,-84.2957:72:PASS:6578:12127:5128:2:44:0:24:0	0/0:0,-7.82066,-92.1939:78:PASS:4928:9122:4474:2:42:0:26:0	0/0:0,-8.72526,-103.895:87:PASS:6068:11158:5372:2:44:1:29:0	0/0:0,-6.01764,-71.297:60:PASS:4621:7182:4131:2:27:0:20:0	0/0:0,-15.9434,-187.689:157:PASS:13325:24843:11825:2:83:0:53:0	0/0:0,-6.91579,-79.8921:69:PASS:5508:10017:4950:2:39:0:23:0	0/0:0,-5.69817,-65.0786:57:PASS:5299:9883:4630:2:40:0:19:0	0/0:0,-9.62728,-113.094:96:PASS:6001:9465:5309:2:52:0:32:0	0/0:0,-3.21483,-73.0912:32:PASS:4845:8668:3921:2:36:1:22:1	0/0:0,-7.82157,-90.8948:78:PASS:5138:9656:4623:2:42:0:26:0	0/0:0,-7.82262,-92.2958:78:PASS:5978:9372:5311:2:46:0:26:0	0/0:0,-6.91847,-79.8948:69:PASS:5212:9571:4767:2:34:0:23:0
Chr02	36159258	36163960	DEL00034321	4702	0.978814	0.0211864	0	0	PASS	PRECISE	DEL	33	-7,7	-7,7	TGCAAGCACGGCTTCTTGTCTTCCACGTAAAAAAGATGTGCGGTATGCTCTGTTACTATACTTGTGGACATATTTACTTGGAAAAACTGCACCAAACAACTGTTTCTGTTACAGGTTGCCTCCTAGTTCTCCTGTTTCTCCTCTGC	0/0:0,-2.10684,-27.4996:21:PASS:80:162:73:2:14:0:7:0	0/0:0,-12.932,-149.888:129:PASS:298:600:394:2:64:0:43:0	0/0:0,-12.8897,-148.345:129:PASS:328:747:368:2:77:0:43:0	0/0:0,-9.8818,-114.448:99:PASS:258:568:339:2:48:0:33:0	0/0:0,-1.80574,-22.7996:18:PASS:116:198:96:2:15:0:6:0	0/0:0,-8.72656,-104.597:87:PASS:249:539:345:2:41:0:29:0	0/0:0,-9.62898,-114.996:96:PASS:248:547:339:2:40:1:32:0	0/0:0,-10.7853,-128.448:108:PASS:313:719:398:2:47:0:36:0	0/0:0,-17.7009,-205.74:10000:PASS:380:730:444:2:50:19:59:0	0/0:0,-1.46892,-16.2638:15:PASS:93:152:66:2:9:5:5:0	0/0:0,-13.8408,-166.093:138:PASS:383:829:512:2:69:0:46:0	0/0:0,-18.052,-217.89:10000:PASS:400:844:464:2:76:0:60:0	0/0:0,-16.5139,-200.557:10000:PASS:707:1568:962:2:127:0:55:0	0/0:0,-2.10684,-27.4996:21:PASS:100:172:81:2:18:1:7:0	0/0:0,-13.8367,-166.989:138:PASS:372:746:438:2:75:0:46:0	0/0:0,-9.47277,-101.54:95:PASS:271:527:230:2:55:0:32:0	0/0:0,-10.7907,-122.054:108:PASS:225:416:230:2:38:24:36:0	0/0:0,-8.1216,-94.8938:81:PASS:168:467:209:2:44:0:27:0	0/0:0,-11.1343,-135.096:111:PASS:323:792:367:2:49:0:37:0	0/0:0,-4.72345,-91.9947:47:PASS:216:426:248:2:46:2:27:1	0/0:0,-12.8998,-151.055:129:PASS:275:760:426:2:73:0:43:0	0/0:0,-9.32523,-108.593:93:PASS:283:474:201:2:31:22:31:0	0/0:0,-8.02938,-91.2016:80:PASS:205:513:263:2:43:0:27:0	0/0:0,-9.62399,-110.091:96:PASS:191:428:211:2:42:0:32:0	0/0:0,-9.57093,-113.738:96:PASS:245:493:221:2:52:0:32:0	0/0:0,-5.67932,-63.5598:57:PASS:187:354:192:2:26:0:19:0	0/0:0,-18.9568,-229.192:10000:PASS:541:1034:543:2:99:0:63:0	0/0:0,-8.36745,-99.0386:84:PASS:200:443:229:2:40:0:28:0	0/0:0,-7.8131,-93.0863:78:PASS:190:443:215:2:38:0:26:0	0/0:0,-9.53343,-109.2:95:PASS:240:459:226:2:39:16:32:0	0/0:0,-5.90089,-66.3803:59:PASS:162:404:202:2:31:0:20:0	0/0:0,-7.18549,-82.8608:72:PASS:210:397:199:2:37:0:24:0	0/0:0,-8.69087,-103.361:87:PASS:234:478:197:2:33:8:29:0	0/0:0,-7.82389,-95.4971:78:PASS:231:458:180:2:36:0:26:0
Chr02	37092275	37094627	DEL00034598	2352	0.919492	0.00423729	0.0762712	0	PASS	PRECISE	DEL	60	-2,2	-2,2	GTTAACATACCATTAGGCACATTGGGCTCGATTTTATCATAGACCGTTTGAAGCAACTCCTCAATGGTAGCCTGGTCATCCTGAAAATTTGAAAACAGGAAAAGTTTAAGGCAACGAGCAAATTTCTGTAATTGAAAATAAAATTTCAATAACAAGTCCTATATGCTCGACAAATTATTGTACTTCAACTAAGTTACCCTTCTTTT	1/1:-41.8991,-3.31044,0:33:PASS:16:0:48:0:0:22:0:11	1/1:-136.993,-11.733,0:117:PASS:126:0:227:0:0:58:0:39	1/1:-185.895,-15.0463,0:150:PASS:129:0:221:0:0:81:0:50	1/1:-132.794,-10.8308,0:108:PASS:98:0:178:0:0:38:0:36	1/1:-33.6992,-2.7085,0:27:PASS:26:0:62:0:0:31:0:9	1/1:-100.697,-8.42559,0:84:PASS:115:0:161:0:0:22:0:28	1/1:-86.0972,-7.22188,0:72:PASS:111:0:158:0:0:25:0:24	1/1:-151.791,-12.634,0:126:PASS:114:0:198:0:0:51:0:42	1/1:-153.891,-13.2361,0:132:PASS:131:6:230:0:0:51:0:44	1/1:-26.3994,-2.10657,0:21:PASS:16:0:63:0:0:20:0:7	1/1:-156.894,-12.9383,0:129:PASS:145:1:242:0:0:64:0:43	1/1:-213.289,-17.7502,0:10000:PASS:167:0:266:0:0:69:0:59	1/1:-289.672,-23.4526,0:10000:PASS:325:2:461:0:0:143:0:78	1/1:-23.5997,-1.80587,0:18:PASS:19:0:44:0:0:15:0:6	1/1:-126.694,-10.831,0:108:PASS:101:2:190:0:0:55:0:36	0/0:0,-6.61817,-77.1955:66:PASS:100:218:134:2:37:0:22:0	0/0:0,-8.42225,-97.9934:84:PASS:100:199:156:2:46:0:28:0	0/0:0,-6.61961,-79.0969:66:PASS:102:182:138:2:36:0:22:0	1/1:-225.389,-18.9538,0:10000:PASS:172:0:244:0:0:63:0:63	0/0:0,-6.31586,-72.7942:63:PASS:125:203:115:2:31:0:21:0	0/0:0,-14.7405,-174.29:147:PASS:195:352:249:2:62:1:49:0	0/0:0,-7.82302,-91.9962:78:PASS:127:264:145:2:51:1:26:0	0/0:0,-9.32726,-110.795:93:PASS:143:282:172:2:43:0:31:0	0/0:0,-8.12167,-93.2939:81:PASS:95:171:118:2:33:0:27:0	0/0:0,-7.8242,-95.2974:78:PASS:105:235:129:2:35:0:26:0	0/0:0,-6.01438,-67.1938:60:PASS:78:194:134:2:28:0:20:0	0/0:0,-16.5481,-196.891:10000:PASS:248:491:328:2:85:1:55:0	0/0:0,-6.31882,-75.7972:63:PASS:105:205:139:2:35:0:21:0	0/0:0,-5.71631,-67.1967:57:PASS:98:221:127:2:32:0:19:0	0/0:0,-6.31684,-72.6952:63:PASS:137:198:144:1:32:0:21:0	0/0:0,-4.51413,-55.4987:45:PASS:93:113:120:1:16:0:15:0	0/0:0,-6.31039,-73.5888:63:PASS:111:191:127:2:36:0:21:0	0/0:0,-7.51968,-86.1939:75:PASS:105:214:138:2:41:0:25:0	0/0:0,-6.31873,-75.0971:63:PASS:108:215:104:2:32:0:21:0
Chr02	38151091	38151482	DUP00018996	391	0.987288	0.0127119	0	0	PASS	PRECISE	DUP	60	-4,4	-4,4	TAAAAGCTTTCTTAATTAGGTTTACACTTTAAGTTCTATCTTTGATCAGAAAAGCTAGGATTTTCATATAAGTTAATTTTTGTGCAAAAAATCTCAACTATATCCTTTGTATTTCTCCTAGATGTTTGCTAAGTATGGAAGGCAATTGTGGAATCAAGGAAACTGGATTTATTTTGTGTCAGATTATTTTTATCTTCTGCA	0/0:0,-2.40778,-31.1995:24:PASS:1452:3360:1708:2:18:0:8:0	0/0:0,-12.636,-148.893:126:PASS:9980:18762:10130:2:65:0:42:0	0/0:0,-14.1436,-174.495:141:PASS:11732:20714:11174:2:74:0:47:0	0/0:0,-14.4413,-175.392:144:PASS:9046:22690:10916:2:76:0:48:0	0/0:0,-3.00967,-38.8994:30:PASS:3098:6029:3068:2:30:0:10:0	0/0:0,-9.93022,-119.496:99:PASS:8421:16647:8251:2:40:0:33:0	0/0:0,-8.72643,-104.397:87:PASS:7687:15235:6412:2:37:0:29:0	0/0:0,-9.92314,-119.089:99:PASS:9524:17048:9930:2:51:0:33:0	0/0:0,-12.638,-152.895:126:PASS:10248:21314:10611:2:65:0:42:0	0/0:0,-2.10678,-26.9996:21:PASS:1933:3610:2804:2:18:0:7:0	0/0:0,-15.6423,-187.689:157:PASS:13203:18964:10496:2:67:0:52:0	0/0:0,-18.9573,-230.192:10000:PASS:15664:29860:12688:2:91:0:63:0	0/0:0,-16.5528,-211.696:10000:PASS:16010:31611:14934:2:138:0:55:0	0/0:0,-1.80586,-23.4997:18:PASS:1509:3925:1893:2:22:0:6:0	0/0:0,-14.7366,-175.486:147:PASS:10777:20866:13492:2:67:0:49:0	0/0:0,-9.62727,-112.094:96:PASS:8107:16224:7711:2:56:0:32:0	0/0:0,-7.82302,-93.0962:78:PASS:5909:12859:6138:2:46:0:26:0	0/0:0,-7.22166,-86.4969:72:PASS:4945:11277:7038:2:41:0:24:0	0/0:0,-18.5585,-220.695:10000:PASS:9714:24477:10535:2:61:0:62:0	0/0:0,-6.31837,-75.6967:63:PASS:7128:12416:6381:2:39:0:21:0	0/0:0,-12.9308,-150.786:129:PASS:11644:22825:10365:2:70:0:43:0	0/0:0,-11.7208,-136.981:117:PASS:8787:15820:9324:2:67:0:39:0	0/0:0,-10.2308,-124.896:102:PASS:8328:14639:7499:2:49:0:34:0	0/0:0,-6.9196,-81.4959:69:PASS:5723:11458:4205:2:37:0:23:0	0/0:0,-11.1329,-134.095:111:PASS:10033:17575:8803:2:60:0:37:0	0/0:0,-6.91968,-81.196:69:PASS:4954:10910:5839:2:36:0:23:0	0/0:0,-17.1516,-206.493:10000:PASS:15932:32607:14981:2:111:0:57:0	0/0:0,-7.81588,-91.2891:78:PASS:5487:11403:6383:2:39:0:26:0	0/0:0,-6.91971,-82.096:69:PASS:6800:12963:6762:2:48:0:23:0	0/0:0,-6.61988,-79.2972:66:PASS:6806:10663:4623:2:42:0:22:0	0/0:0,-8.1234,-96.7956:81:PASS:7676:12176:4884:2:42:0:27:0	0/0:0,-7.82372,-94.5969:78:PASS:6409:13415:5135:2:45:0:26:0	0/0:0,-11.7342,-139.494:117:PASS:8679:15468:9077:2:58:0:39:0	0/0:0,-9.92927,-119.795:99:PASS:7005:14117:7738:2:48:0:33:0
Chr02	39162773	39166961	DUP00019100	4188	0.995763	0.00423729	0	0	PASS	PRECISE	DUP	60	-1,1	-1,1	GGTGCGTGCTAGGTGTTTGCAAATAAGATTGGAGCAAAAGGGGACATCGCCTTCTTCTCCTCATATGACTCCTGACACGGCATGCCTAGGAATTTTTCCATGTTTGTTTCAGATGCTCAAGGTTTAAGGTTAATTCGAAATTATATTGCTT	0/0:0,-1.80567,-22.4995:18:PASS:46:144:53:3:12:0:6:0	0/0:0,-11.4287,-129.49:114:PASS:292:657:277:2:46:0:38:0	0/0:0,-9.62184,-108.289:96:PASS:270:660:218:3:39:0:32:0	0/0:0,-9.92878,-116.495:99:PASS:260:607:254:2:38:0:33:0	0/0:0,-2.10661,-26.3994:21:PASS:67:155:65:2:9:0:7:0	0/0:0,-9.93026,-118.896:99:PASS:268:561:228:2:27:0:33:0	0/0:0,-6.9206,-81.8969:69:PASS:246:565:204:3:25:0:23:0	0/0:0,-12.935,-149.391:129:PASS:284:635:241:2:52:0:43:0	0/0:0,-12.9304,-146.386:129:PASS:363:725:351:2:58:0:43:0	0/0:0,-1.80586,-23.4997:18:PASS:44:139:60:3:9:0:6:0	0/0:0,-13.8327,-157.685:138:PASS:349:724:336:2:48:0:46:0	0/0:0,-12.0283,-139.387:120:PASS:314:791:302:3:52:0:40:0	0/0:0,-13.8377,-166.09:138:PASS:629:1338:610:2:90:0:46:0	0/0:0,-2.70869,-34.7994:27:PASS:41:171:59:3:12:0:9:0	0/0:0,-12.5656,-142.322:126:PASS:277:692:223:3:41:0:42:0	0/0:0,-8.42011,-94.8913:84:PASS:188:469:197:2:50:0:28:0	0/0:0,-9.02489,-103.594:90:PASS:207:390:196:2:41:0:30:0	0/0:0,-6.61985,-79.3972:66:PASS:102:373:206:2:25:0:22:0	0/0:0,-15.6459,-187.392:157:PASS:284:718:343:2:44:0:52:0	0/0:0,-8.7213,-100.991:87:PASS:167:453:224:2:36:0:29:0	0/0:0,-14.7394,-172.089:147:PASS:202:680:387:2:45:0:49:0	0/0:0,-9.02148,-100.691:90:PASS:218:479:219:2:50:0:30:0	0/0:0,-9.01528,-107.584:90:PASS:210:496:216:2:33:0:30:0	0/0:0,-5.71592,-66.3964:57:PASS:105:401:175:3:26:0:19:0	0/0:0,-7.52165,-88.4959:75:PASS:134:512:194:3:35:0:25:0	0/0:0,-4.51317,-53.6977:45:PASS:144:302:147:2:22:0:15:0	0/0:0,-18.9547,-224.59:10000:PASS:438:1011:508:2:94:0:63:0	0/0:0,-7.22101,-84.3963:72:PASS:112:372:183:3:26:0:24:0	0/0:0,-6.24035,-70.1187:62:PASS:106:417:186:3:26:0:21:0	0/0:0,-7.52195,-88.7962:75:PASS:154:466:199:3:40:0:25:0	0/0:0,-5.11156,-59.1941:51:PASS:122:334:143:3:20:0:17:0	0/0:0,-7.82201,-91.3952:78:PASS:112:389:176:3:29:0:26:0	0/0:0,-8.41796,-97.5891:84:PASS:179:451:183:2:43:0:28:0	0/0:0,-7.22057,-85.3959:72:PASS:171:357:174:2:30:0:24:0
Chr02	39559146	39600214	INV00046003	41068	0.978814	0.0211864	0	0	PASS	PRECISE	INV	60	-3,3	-3,3	TGTCAATATTTATAAATAAGAATGTATCCTACATAGAACTAAAACTCTGTATTTTCATAACATTTTGAGTTACATATACAAAACTGATGATTGGATTAGAAAAACTATTGGCTGACAGCCTCGATGCAGTCAGGATCATGCTGGAGAGGTGTCCGGACTGCGTCACGCTGCGAGACGCCAGGGGAAGGACTTTCCTCCACGCCGCCGTTGAGGCGGAAGCGTAC	0/0:0,-2.10677,-26.9996:21:PASS:491:1073:646:2:15:0:7:0	0/0:0,-10.8262,-124.389:108:PASS:3118:4874:3233:2:56:0:36:0	0/0:0,-15.0432,-178.292:150:PASS:2965:5078:3502:2:72:0:50:0	0/0:0,-9.92848,-119.094:99:PASS:2705:4625:2898:2:57:0:33:0	0/0:0,-2.10673,-26.9995:21:PASS:717:1435:982:2:17:0:7:0	0/0:0,-9.02735,-107.996:90:PASS:2281:3884:2489:2:36:0:30:0	0/0:0,-7.82337,-92.6966:78:PASS:2297:3875:2545:2:28:0:26:0	0/0:0,-9.92815,-117.094:99:PASS:2676:4697:3236:2:44:0:33:0	0/0:0,-12.6351,-146.892:126:PASS:3525:6317:4037:2:61:0:42:0	0/0:0,-3.00969,-38.8994:30:PASS:705:1342:872:2:18:0:10:0	0/0:0,-15.3422,-179.89:154:PASS:3640:5981:4138:2:81:0:51:0	0/0:0,-15.0315,-172.08:150:PASS:3586:5965:4085:2:70:0:50:0	0/0:0,-15.045,-184.393:150:PASS:6529:10436:7226:2:128:0:50:0	0/0:0,-3.91228,-49.8989:39:PASS:632:1211:819:2:26:0:13:0	0/0:0,-13.0702,-151.725:131:PASS:3048:5411:3473:2:68:0:44:0	0/0:0,-7.81813,-88.6914:78:PASS:1830:3817:2207:2:36:0:26:0	0/0:0,-5.71678,-67.5972:57:PASS:1865:3161:1975:2:33:0:19:0	0/0:0,-7.22184,-86.2971:72:PASS:1594:1848:1908:1:22:0:24:0	0/0:0,-11.5702,-137.43:116:PASS:3184:4532:3401:1:39:0:39:0	0/0:0,-8.12344,-96.0956:81:PASS:1774:2037:2037:1:28:0:27:0	0/0:0,-9.02026,-105.389:90:PASS:2740:3064:2791:1:29:0:30:0	0/0:0,-9.3287,-113.197:93:PASS:2096:4521:2550:2:50:0:31:0	0/0:0,-5.11518,-61.1977:51:PASS:2036:3346:2005:2:35:0:17:0	0/0:0,-3.71832,-66.2999:37:PASS:1520:1736:1836:1:21:0:19:1	0/0:0,-9.32299,-110.991:93:PASS:2069:3894:2354:2:47:0:31:0	0/0:0,-5.71381,-64.6942:57:PASS:1504:3055:1719:2:27:0:19:0	0/0:0,-18.347,-214.584:10000:PASS:4708:7571:5135:2:96:0:61:0	0/0:0,-6.01672,-69.9961:60:PASS:1640:1877:2021:1:20:0:20:0	0/0:0,-5.71694,-67.7974:57:PASS:1680:1858:1912:1:20:0:19:0	0/0:0,-7.72388,-87.7971:77:PASS:1965:3884:2307:2:47:0:26:0	0/0:0,-6.3192,-75.8976:63:PASS:1528:2452:1760:1:37:0:21:0	0/0:0,-5.41662,-65.5981:54:PASS:1605:1702:1996:1:27:0:18:0	0/0:0,-7.51877,-86.693:75:PASS:2015:3261:2190:2:39:0:25:0	0/0:0,-6.6199,-79.3972:66:PASS:1766:3436:1911:2:35:0:22:0
Chr02	41163234	44394726	INV00046415	3231492	0.995763	0.00423729	0	0	PASS	PRECISE	INV	60	-3,3	-3,3	ACCACAGGCAATTGATTGTTCTGTCGTGCGAGCATGCACACTCGCGGTATAAGTTTGTTGCATTGGAGATGTGCAATGTATAAGGTAGCCAACTAGCCATACATGCATCAGCACTTTTCAACTCTTCCTAAACTTGATTAAAACAACTCTTGCTAAACCATTGCTGACCTTTTTTTTTTTTGATGTTTGGTCATCCATGAT	0/0:0,-1.80587,-23.5997:18:PASS:44879:81885:42069:2:9:0:6:0	0/0:0,-14.1398,-167.591:141:PASS:228506:447448:230554:2:37:0:47:0	0/0:0,-12.9369,-154.293:129:PASS:238700:446197:230469:2:44:0:43:0	0/0:0,-12.0309,-140.19:120:PASS:202140:397954:202568:2:35:0:40:0	0/0:0,-1.80583,-23.2997:18:PASS:66036:118361:61625:2:10:0:6:0	0/0:0,-8.12367,-95.2959:81:PASS:177212:345174:181112:2:22:0:27:0	0/0:0,-9.32768,-110.396:93:PASS:178078:346999:180306:2:22:0:31:0	0/0:0,-13.54,-166.094:135:PASS:224391:422326:221036:2:34:0:45:0	0/0:0,-15.9408,-189.286:157:PASS:277427:538665:273561:2:41:0:53:0	0/0:0,-2.1063,-25.3991:21:PASS:59741:107181:55265:2:10:0:7:0	0/0:0,-13.7424,-159.295:137:PASS:286234:539771:282980:2:47:0:46:0	0/0:0,-18.9533,-225.188:10000:PASS:279974:525994:273321:2:61:0:63:0	0/0:0,-16.8486,-204.991:10000:PASS:509926:978106:507275:2:80:0:56:0	0/0:0,-2.40563,-29.4974:24:PASS:55004:98476:51467:2:17:0:8:0	0/0:0,-15.9454,-193.191:157:PASS:246850:463097:239781:2:43:0:53:0	0/0:0,-6.00085,-66.0802:60:PASS:160376:288513:147333:2:22:0:20:0	0/0:0,-8.42443,-99.1956:84:PASS:147815:284949:144835:2:27:0:28:0	0/0:0,-7.52135,-88.1956:75:PASS:135507:260048:133124:2:25:0:25:0	0/0:0,-13.84,-164.793:138:PASS:250933:478674:254029:2:32:0:46:0	0/0:0,-7.52235,-90.0966:75:PASS:149148:285578:155239:2:27:0:25:0	0/0:0,-10.2239,-117.289:102:PASS:224913:447607:237536:2:33:1:34:0	0/0:0,-7.52213,-89.0964:75:PASS:182944:333287:172564:2:34:0:25:0	0/0:0,-7.52151,-90.4958:75:PASS:169675:343366:175373:2:24:0:25:0	0/0:0,-6.82289,-78.1992:68:PASS:129678:248176:127281:2:20:0:23:0	0/0:0,-9.32575,-110.194:93:PASS:164218:300274:153266:2:33:1:31:0	0/0:0,-6.91921,-81.1955:69:PASS:126116:227668:115147:2:23:0:23:0	0/0:0,-21.6599,-253.586:10000:PASS:356915:692537:350467:2:66:0:72:0	0/0:0,-6.31809,-73.7965:63:PASS:141474:276119:141781:2:23:0:21:0	0/0:0,-5.41627,-64.8977:54:PASS:138195:267598:137762:2:23:0:18:0	0/0:0,-7.2198,-85.6951:72:PASS:157816:309438:160765:2:33:0:24:0	0/0:0,-7.51576,-86.69:75:PASS:122626:228158:117654:2:23:0:25:0	0/0:0,-8.42468,-98.7958:84:PASS:131918:271884:141076:2:26:0:28:0	0/0:0,-11.1331,-133.295:111:PASS:158272:304692:155582:2:36:0:37:0	0/0:0,-8.41753,-96.1887:84:PASS:142268:265243:135552:2:22:0:28:0
Chr02	41394510	41398613	DEL00035833	4103	0.995763	0	0.00423729	0	PASS	PRECISE	DEL	60	-5,5	-5,5	CCTCGGCGCCGGGCCGGCCGCCGACTCCGCGGCCCGGGCCGCCTGAATGAAGTCGATTTTTACATTATTATAGTAGCTTTCTATTAAAGATTAGTATCGTGCTGGCGTTGTTCATCTTGTTGATCGTTGTTTTTTTCTCTCGAATATTGTTGATCGTTGTTGCTAATAGCATGTTCATCTTGTTGATTGTTAAATCTTGTTGACACTTCAACTAATCCA	0/0:0,-1.50487,-19.4997:15:PASS:59:164:44:3:13:0:5:0	0/0:0,-10.2279,-122.693:102:PASS:314:623:188:2:41:0:34:0	0/0:0,-11.7287,-135.688:117:PASS:329:695:232:2:57:0:39:0	0/0:0,-10.192,-117.957:102:PASS:293:573:165:3:41:0:34:0	0/0:0,-2.10682,-27.3996:21:PASS:65:223:54:4:14:0:7:0	0/0:0,-6.62001,-78.4973:66:PASS:228:483:177:2:24:1:22:0	0/0:0,-7.22108,-83.9964:72:PASS:245:469:165:2:30:0:24:0	0/0:0,-9.92752,-118.094:99:PASS:333:679:190:3:42:0:33:0	0/0:0,-14.4417,-171.992:144:PASS:385:725:335:2:53:0:48:0	0/0:0,-2.10687,-27.6997:21:PASS:71:156:62:2:10:0:7:0	0/0:0,-14.125,-160.477:141:PASS:388:775:282:2:64:0:47:0	0/0:0,-12.4694,-143.426:125:PASS:343:841:243:3:62:0:42:0	0/0:0,-14.7373,-180.387:147:PASS:731:1517:470:3:108:0:49:0	0/0:0,-1.5042,-18.199:15:PASS:71:175:45:3:13:0:5:0	0/0:0,-12.4677,-143.324:125:PASS:370:767:230:3:58:0:42:0	0/0:0,-8.72442,-101.495:87:PASS:192:451:182:2:40:0:29:0	0/0:0,-8.42377,-98.5949:84:PASS:202:363:181:2:41:1:28:0	0/0:0,-8.1223,-94.7945:81:PASS:206:324:193:2:37:0:27:0	0/0:0,-16.8497,-202.492:10000:PASS:359:664:311:2:47:0:56:0	0/0:0,-9.32611,-109.694:93:PASS:202:371:168:2:34:0:31:0	0/0:0,-9.62942,-116.196:96:PASS:311:590:241:2:45:0:32:0	0/0:0,-10.5261,-119.99:105:PASS:239:380:224:2:48:3:35:0	0/0:0,-6.92079,-84.0971:69:PASS:231:469:212:2:30:0:23:0	0/0:0,-7.2217,-86.697:72:PASS:185:350:152:2:29:0:24:0	0/0:0,-5.71471,-67.4951:57:PASS:211:504:171:3:27:0:19:0	0/0:0,-6.91912,-80.2954:69:PASS:180:289:156:2:23:0:23:0	0/0:0,-19.2557,-232.79:10000:PASS:492:848:463:2:89:0:64:0	0/0:0,-7.52065,-86.9949:75:PASS:196:351:204:2:35:0:25:0	0/0:0,-6.3186,-75.297:63:PASS:204:354:166:2:30:0:21:0	0/0:0,-7.82308,-92.8963:78:PASS:230:376:171:2:35:1:26:0	0/0:0,-6.31934,-76.5977:63:PASS:153:381:133:3:26:0:21:0	0/0:0,-9.02582,-107.095:90:PASS:182:351:208:2:46:0:30:0	0/0:0,-9.62919,-116.896:96:PASS:209:381:208:2:41:2:32:0	0/0:0,-6.01697,-71.1964:60:PASS:195:314:178:2:34:0:20:0
Chr02	42410443	44268358	DUP00019381	1857915	0.995763	0.00423729	0	0	PASS	PRECISE	DUP	21	-3,3	-3,3	GGTAAACAATTTTGATTATTAGCTAAAAATTTAATTTTTAAATAACTTTTATATACAATAGCTTCTAAAAATATTAGCCCGTGCGGAAGCACGGGTTGATGGACTAGTTTAGATAATTCGTTTCAAAAAAAATGTATTTAGATAGAGCACTATTGTGCAG	0/0:0,-1.80588,-23.6997:18:PASS:22692:47457:23892:2:12:0:6:0	0/0:0,-12.0302,-142.389:120:PASS:124082:260027:131582:2:58:0:40:0	0/0:0,-17.1507,-205.392:10000:PASS:122866:258871:131873:2:72:0:57:0	0/0:0,-12.6381,-152.795:126:PASS:111173:230657:114458:2:59:0:42:0	0/0:0,-2.70874,-34.8995:27:PASS:32352:68784:35257:2:21:0:9:0	0/0:0,-10.2313,-122.896:102:PASS:95421:200713:103478:2:32:0:34:0	0/0:0,-8.72587,-102.496:87:PASS:95922:201819:102598:2:32:0:29:0	0/0:0,-11.1334,-133.395:111:PASS:116349:245811:125581:2:54:0:37:0	0/0:0,-15.043,-176.891:150:PASS:149151:313436:155703:2:64:1:50:0	0/0:0,-1.80553,-22.0994:18:PASS:29463:62364:31559:2:10:0:6:0	0/0:0,-14.7396,-174.689:147:PASS:151685:310211:162413:2:62:0:49:0	0/0:0,-16.55,-202.793:10000:PASS:145737:304802:155231:2:63:0:55:0	0/0:0,-16.8511,-207.093:10000:PASS:269159:568745:290359:2:104:0:56:0	0/0:0,-1.50489,-19.6997:15:PASS:27252:56951:29239:2:15:0:5:0	0/0:0,-12.335,-146.993:123:PASS:128540:268075:136616:2:69:0:41:0	0/0:0,-8.42135,-95.6925:84:PASS:83720:162824:83977:2:38:0:28:0	0/0:0,-8.10913,-90.7813:81:PASS:79147:164870:84067:2:45:0:27:0	0/0:0,-8.72581,-104.296:87:PASS:72158:150812:75029:2:33:0:29:0	0/0:0,-9.02753,-109.197:90:PASS:134179:274607:144948:2:32:0:30:0	0/0:0,-6.61564,-77.293:66:PASS:78149:166859:86364:2:25:0:22:0	0/0:0,-9.02539,-106.994:90:PASS:121109:263455:136207:2:42:0:30:0	0/0:0,-10.224,-118.989:102:PASS:95772:189976:96286:2:58:0:34:0	0/0:0,-6.92091,-84.5972:69:PASS:90105:203890:100158:2:46:5:23:0	0/0:0,-6.01755,-70.797:60:PASS:68711:143885:71925:2:39:0:20:0	0/0:0,-9.92981,-119.896:99:PASS:83694:172012:86430:2:41:0:33:0	0/0:0,-7.52124,-87.8955:75:PASS:61251:132812:65504:2:29:0:25:0	0/1:-127.113,0,-113.68:10000:PASS:189797:405302:198721:2:62:37:38:50	0/0:0,-9.92662,-115.293:99:PASS:76093:160660:79973:2:42:0:33:0	0/0:0,-8.7199,-101.19:87:PASS:73624:155480:77180:2:43:0:29:0	0/0:0,-7.51278,-86.787:75:PASS:88586:178605:90668:2:48:0:25:0	0/0:0,-9.62847,-114.596:96:PASS:63098:132342:65760:2:34:0:32:0	0/0:0,-6.60944,-74.4868:66:PASS:77631:157712:79365:2:47:0:22:0	0/0:0,-6.31718,-73.9955:63:PASS:89943:172641:85633:2:43:0:21:0	0/0:0,-6.92124,-83.5975:69:PASS:77236:151592:74547:2:38:0:23:0
Chr02	42519944	45125133	INV00046789	2605189	0.944915	0.0550847	0	0	PASS	PRECISE	INV	60	-1,1	-1,1	AGCAACGAAGATGATTTGCAAAATGTCAGGTGCAACATGTTCTGCAGCTTACAATTACAACCAAAGTGAATAAGTCTTGCAACATATTGAAAGCATACAATAAGTCTTGCAAAGCGCCAATATTTTCTTTGCCTTGTGTATTATTCGCCGCTTTTTGAAAAGCCACATCAGACAGTCTGTTAGGTTCAGTGGTTTCTGCTGACGGCAA	0/1:-17.5862,0,-26.3864:10000:PASS:32444:66850:34109:2:17:1:8:6	0/1:-126.567,0,-416.015:10000:PASS:177257:365729:186167:2:150:23:138:52	0/1:-135.83,0,-421.915:10000:PASS:177023:365266:183967:2:125:37:136:54	0/1:-94.5785,0,-352.744:10000:PASS:158641:321665:164592:2:113:25:117:39	0/1:-9.68134,0,-52.4796:97:PASS:46654:97580:49529:2:23:10:16:4	0/1:-88.158,0,-369.846:10000:PASS:137043:283421:145741:2:96:17:116:37	0/1:-90.3543,0,-373.645:10000:PASS:137648:283903:145971:2:100:23:117:38	0/1:-85.5783,0,-410.332:10000:PASS:167027:346650:179171:2:117:23:132:38	0/0:0,-25.2728,-298.686:10000:PASS:212789:438419:221320:2:101:0:84:0	0/0:0,-3.60974,-43.9974:36:PASS:42135:88015:44367:2:18:0:12:0	0/1:-109.219,0,-507.394:10000:PASS:217422:440880:228136:2:170:20:163:49	0/1:-130.044,0,-426.608:10000:PASS:209482:429853:220078:2:132:35:142:53	0/1:-118.757,0,-519.888:10000:PASS:387537:801331:407882:2:270:58:162:49	0/1:-23.0801,0,-40.1795:10000:PASS:39134:80873:41306:2:25:2:13:8	0/1:-125.625,0,-348.942:10000:PASS:184530:377927:193170:2:111:31:115:50	0/0:0,-6.28974,-71.1681:63:PASS:118883:230981:119799:2:38:0:21:0	0/0:0,-6.31903,-75.6974:63:PASS:113360:232670:116275:2:28:0:21:0	0/0:0,-7.52029,-87.2945:75:PASS:102432:211593:107278:2:32:0:25:0	0/0:0,-13.7937,-163.246:138:PASS:192412:392088:204265:2:63:0:46:0	0/0:0,-9.32844,-113.297:93:PASS:112404:236684:125698:2:71:0:31:0	0/0:0,-19.255,-227.989:10000:PASS:173191:373832:188744:2:76:0:64:0	0/0:0,-8.98615,-100.855:90:PASS:135204:267211:141359:2:43:0:30:0	0/0:0,-19.1546,-223.989:10000:PASS:131211:284120:140144:2:81:0:64:0	0/0:0,-10.5226,-118.987:105:PASS:97874:201994:102578:2:39:1:35:0	0/0:0,-4.51238,-53.8969:45:PASS:119887:242559:124555:2:21:0:15:0	0/0:0,-7.44564,-86.2199:74:PASS:89370:185546:94310:2:33:0:25:0	0/0:0,-47.8047,-562.441:10000:PASS:273573:562553:281981:2:224:0:159:0	0/0:0,-12.0333,-142.292:120:PASS:108987:225009:113947:2:57:0:40:0	0/0:0,-9.92943,-118.095:99:PASS:105133:217815:111850:2:36:0:33:0	0/0:0,-10.2295,-122.495:102:PASS:123900:251724:129697:2:52:0:34:0	0/0:0,-6.0173,-71.4967:60:PASS:89882:185598:95282:2:29:0:20:0	0/0:0,-15.6455,-185.792:157:PASS:109162:221103:112027:2:72:0:52:0	0/0:0,-8.72416,-102.994:87:PASS:125189:241068:129663:2:37:1:29:0	0/0:0,-9.32564,-111.094:93:PASS:108115:211258:112950:2:31:0:31:0
Chr02	42676903	43088925	INV00046824	412022	0.970339	0.029661	0	0	PASS	PRECISE	INV	60	-2,2	-2,2	TGCCGCCTTGCAGTGCCCGTGCCGTCGGCGGCTCGCCCCGCTCTTCAATTCCTATGTCTGCTCCTCCTCATGCTCCGGACCATGCTCCACCTGCTACGGTGGCCATGCATACTCATCATGATGTTGTTGTACTGCAGATATTTTTCAGAGCCAGATAACATGGTCGAGAAAGCACACCATGATGCAATCTTTTCTAGGATTGTGAATGACTCC	0/0:0,-1.80587,-23.5997:18:PASS:5693:10111:5137:2:9:0:6:0	0/0:0,-8.42098,-100.592:84:PASS:30336:55983:27978:2:44:0:28:0	0/0:0,-10.7971,-119.06:108:PASS:29983:55822:28001:2:58:0:36:0	0/0:0,-14.1145,-156.066:141:PASS:28529:49308:24761:2:46:0:47:0	0/0:0,-1.80535,-21.9992:18:PASS:7653:14937:7446:2:13:1:6:0	0/0:0,-9.93037,-119.296:99:PASS:24018:42755:21518:2:31:0:33:0	0/0:0,-7.5231,-90.4973:75:PASS:23626:43218:21621:2:21:0:25:0	0/0:0,-8.41601,-92.8872:84:PASS:28575:52641:26825:2:35:0:28:0	0/0:0,-12.2977,-137.455:123:PASS:35845:68212:33570:2:47:0:41:0	0/0:0,-1.50463,-18.6995:15:PASS:6893:13542:6704:2:11:0:5:0	0/0:0,-11.9735,-135.132:120:PASS:36745:68555:34462:2:52:0:40:0	0/0:0,-11.6865,-130.146:117:PASS:35606:65889:32729:2:45:1:39:0	0/0:0,-14.1431,-175.495:141:PASS:66770:123799:60257:2:86:0:47:0	0/0:0,-1.50461,-18.8995:15:PASS:6431:12300:6139:2:11:0:5:0	0/0:0,-11.3492,-129.41:113:PASS:31576:57713:29237:2:50:0:38:0	0/0:0,-6.80918,-75.2855:68:PASS:17432:35300:17347:2:29:0:23:0	0/0:0,-6.55795,-73.2353:66:PASS:18706:35330:17596:2:35:0:22:0	0/0:0,-6.01812,-72.0975:60:PASS:16455:32352:16104:2:24:0:20:0	0/0:0,-10.5142,-123.778:105:PASS:30356:59893:29807:2:35:1:35:0	0/1:-4.18153,0,-60.7777:42:PASS:19197:35955:17525:2:22:1:19:3	0/0:0,-11.7298,-135.69:117:PASS:27196:57193:27512:2:45:0:39:0	0/0:0,-9.86441,-106.53:99:PASS:21217:42362:19855:2:39:0:33:0	0/0:0,-6.92061,-82.9969:69:PASS:20931:43880:21087:2:27:0:23:0	0/0:0,-5.41473,-64.0962:54:PASS:15986:30802:15193:2:26:0:18:0	0/0:0,-8.42596,-102.397:84:PASS:18175:37294:18058:2:35:0:28:0	0/0:0,-4.81333,-57.1968:48:PASS:14660:29297:14385:2:20:0:16:0	0/0:0,-15.9468,-189.592:157:PASS:47756:87899:41613:2:64:0:53:0	0/0:0,-7.80428,-89.0775:78:PASS:18299:34377:16765:2:34:0:26:0	0/0:0,-7.51856,-86.2928:75:PASS:17406:33482:16487:2:33:0:25:0	0/0:0,-9.32364,-106.992:93:PASS:20340:39878:18767:2:49:0:31:0	0/0:0,-3.61086,-42.7985:36:PASS:14154:28312:14381:2:21:0:12:0	0/0:0,-5.41485,-64.1963:54:PASS:18765:34307:16701:2:32:0:18:0	0/0:0,-6.61684,-75.8942:66:PASS:19440:38391:18808:2:34:0:22:0	0/0:0,-7.22238,-88.3977:72:PASS:16678:33625:16484:2:29:0:24:0
Chr02	43125364	47279675	DEL00036332	4154311	0.957627	0.0423729	0	0	PASS	PRECISE	DEL	22	-3,3	-3,3	GGGGTCATGTTACCCATTTCTGTAGTCTGTACCATCTACAGAACCTATCCAGTGGTGAGAGCACAGATCAGCTACACGCCCACACCTGCACTGGGAAATGCTTTGATCTGGACACACTCAGCTGCACGGCAATGCGATAATGATCACCGGCACAATCACTGTCGTCCTATTTAGCACCATGGTGAGTCATCTTGTTCCAATATTCGTATAATGCAATGT	0/0:0,-2.4078,-31.3996:24:PASS:54261:109521:37791:2:13:0:8:0	0/0:0,-12.0298,-134.989:120:PASS:289343:595259:214859:2:65:1:40:0	0/0:0,-13.8342,-165.187:138:PASS:293141:591503:205764:2:70:1:46:0	0/0:0,-11.1106,-129.673:111:PASS:258417:522426:184019:2:59:1:37:0	0/0:0,-2.10578,-25.9986:21:PASS:78702:160177:55800:2:17:0:7:0	0/0:0,-8.72568,-102.596:87:PASS:224002:462126:169540:2:36:0:29:0	0/0:0,-10.2311,-121.996:102:PASS:225528:462742:168618:2:37:0:34:0	0/0:0,-12.6356,-150.892:126:PASS:275725:570305:203501:2:49:0:42:0	0/0:0,-12.3282,-141.486:123:PASS:348690:712092:257909:2:61:0:41:0	0/0:0,-2.10673,-26.9995:21:PASS:70843:144492:51224:2:17:0:7:0	0/0:0,-16.247,-192.491:10000:PASS:356717:725257:266776:2:79:0:54:0	0/0:0,-14.6417,-165.991:146:PASS:345349:704687:250911:2:74:0:49:0	0/0:0,-15.0461,-187.195:150:PASS:636488:1306199:458302:2:116:0:50:0	0/0:0,-1.50484,-19.3997:15:PASS:65518:133141:46325:2:14:0:5:0	0/0:0,-17.7494,-209.989:10000:PASS:304157:618731:219595:2:73:0:59:0	0/0:0,-6.61878,-77.9961:66:PASS:194190:383121:134504:2:39:0:22:0	0/0:0,-5.41411,-61.6956:54:PASS:185893:374641:127375:2:27:0:18:0	0/0:0,-6.92009,-81.9964:69:PASS:168737:344691:119994:2:40:0:23:0	0/0:0,-15.6387,-182.785:157:PASS:314743:648238:232545:2:64:1:52:0	0/1:-10.9625,0,-103.927:110:PASS:184249:390542:134654:2:37:3:33:9	0/0:0,-12.9342,-151.49:129:PASS:282654:606506:214045:2:67:0:43:0	0/0:0,-7.51851,-84.6928:75:PASS:221545:441856:152643:2:43:0:25:0	0/0:0,-14.1271,-164.379:141:PASS:215480:455032:163267:2:60:0:47:0	0/0:0,-7.18352,-79.6588:72:PASS:161594:328654:118654:2:36:0:24:0	0/0:0,-7.82226,-91.5955:78:PASS:197537:397966:140545:2:34:0:26:0	0/1:-54.6625,0,-62.7785:10000:PASS:149344:303048:108334:2:32:7:22:22	0/0:0,-18.356,-222.093:10000:PASS:447670:908990:314941:2:87:0:61:0	0/0:0,-9.31855,-106.587:93:PASS:178707:366100:126530:2:42:0:31:0	0/0:0,-6.01766,-71.1971:60:PASS:173113:355392:123327:2:32:0:20:0	0/0:0,-2.61711,-65.4956:26:PASS:200154:408021:137380:2:38:0:20:1	0/0:0,-7.21988,-84.1952:72:PASS:148884:304579:105599:2:30:0:24:0	0/0:0,-6.61392,-73.2913:66:PASS:174151:355330:120443:2:30:0:22:0	0/1:-44.3498,0,-99.6162:10000:PASS:201856:402760:141461:2:44:5:32:21	0/0:0,-7.22038,-87.1957:72:PASS:175026:351763:121174:2:33:1:24:0
Chr02	44053511	44268360	INV00047114	214849	0.95339	0.0466102	0	0	PASS	PRECISE	INV	32	-4,4	-4,4	AAAACAACCTACAATTTGTGTAACAGAGTGATTATCGCTGGCACTACATTTCATAAGCACTAGTCCATCAACCCGTGCTTCCGCACGGGCTAATATTTTTAGAAGCTATTGTACATAAAAGTTATTTAAAAATTAAATTTTTAGCTAATAATTAAAATTGTTTACCTA	0/0:0,-2.10642,-25.9992:21:PASS:2941:5674:2438:2:12:2:7:0	0/0:0,-13.8382,-160.291:138:PASS:15704:30214:14184:2:54:10:46:0	0/0:0,-17.4434,-203.984:10000:PASS:15244:30615:13684:2:61:9:58:0	0/0:0,-12.0354,-145.694:120:PASS:13713:27043:12479:2:42:6:40:0	0/0:0,-2.40768,-30.9994:24:PASS:4210:8366:3516:2:16:1:8:0	0/0:0,-10.8327,-128.896:108:PASS:11855:23187:10950:2:28:0:36:0	0/0:0,-9.62684,-112.794:96:PASS:11863:22841:10758:2:28:3:32:0	0/0:0,-12.9398,-159.996:129:PASS:14682:28683:13091:2:47:6:43:0	0/1:-122.626,0,-78.9584:10000:PASS:18245:38056:16951:2:38:36:28:48	0/1:-21.7899,0,-4.6692:47:PASS:3690:7952:3172:2:8:5:2:8	0/0:0,-16.2475,-192.992:10000:PASS:16605:33378:17059:2:47:6:54:0	0/0:0,-16.8479,-200.49:10000:PASS:18506:36225:16033:2:60:9:56:0	0/0:0,-13.5142,-167.968:135:PASS:34087:67259:31139:2:87:5:45:0	0/0:0,-1.5048,-19.0997:15:PASS:3444:7000:2925:2:11:0:5:0	0/0:0,-12.3365,-149.294:123:PASS:16155:32106:14170:2:63:5:41:0	0/1:-64.9611,0,-41.4695:10000:PASS:10037:19886:8815:2:30:21:16:26	0/0:0,-7.21864,-82.5939:72:PASS:9652:19301:9107:2:40:0:24:0	0/0:0,-8.72302,-100.293:87:PASS:9138:19741:8129:2:37:0:29:0	0/0:0,-10.2296,-121.795:102:PASS:16783:34435:15004:2:39:25:34:0	0/1:-65.0659,0,-26.6061:10000:PASS:10029:20136:8880:2:16:15:10:24	0/0:0,-13.8383,-163.291:138:PASS:15317:34533:14717:2:64:1:46:0	0/0:0,-9.31683,-104.085:93:PASS:11626:23281:10842:2:54:0:31:0	0/0:0,-10.8313,-130.594:108:PASS:11572:26055:11102:2:49:0:36:0	0/0:0,-5.71474,-66.2952:57:PASS:8705:18883:7600:2:37:0:19:0	0/0:0,-9.32565,-111.394:93:PASS:10363:21577:9489:2:40:0:31:0	0/1:-51.269,0,-42.776:10000:PASS:8014:15673:7073:2:16:32:15:18	0/0:0,-20.1608,-243.792:10000:PASS:23488:53151:21393:2:105:1:67:0	0/0:0,-8.42149,-97.6926:84:PASS:9565:20957:8423:2:49:0:28:0	0/0:0,-9.32026,-106.088:93:PASS:9243:20503:8480:2:45:0:31:0	0/0:0,-4.52392,-88.7962:45:PASS:10354:20620:9684:2:47:2:26:1	0/0:0,-9.02511,-104.394:90:PASS:7838:17191:6745:2:34:0:30:0	0/0:0,-6.88875,-77.8651:69:PASS:9118:18546:8657:2:40:0:23:0	0/0:0,-6.92093,-83.2972:69:PASS:10437:21231:9337:2:46:39:23:0	0/0:0,-6.31881,-75.3972:63:PASS:9153:18061:8072:2:36:0:21:0
Chr02	44995808	44996349	DUP00019511	541	0.978814	0.0211864	0	0	PASS	PRECISE	DUP	60	-1,1	-1,1	CCAACAAGATTGAGAAAAAAGTAGAAATAATATATTCATTGCCATTGTTTGCAACTTTTAAAAGTAAAGCTCCTTTTACTTGTGACAACATTAATAACGAACATTACATGAACGCAATGTATAGTGTGTAAAAACAGAAACATGCGACCAAGCAAAAACAATTTGAAGATCATTGAAACAGAAAAAACGAATATGGTTCTGGGTACATGAGAGGAAAATGAT	0/0:0,-1.80561,-22.9994:18:PASS:10:25:15:2:18:0:6:0	0/0:0,-11.7313,-135.991:117:PASS:42:102:38:3:63:0:39:0	0/0:0,-12.622,-146.479:126:PASS:52:108:52:2:77:0:42:0	0/0:0,-11.7333,-138.993:117:PASS:38:79:33:2:53:0:39:0	0/0:0,-2.40767,-30.5994:24:PASS:21:46:19:2:26:0:8:0	0/0:0,-7.82336,-93.6966:78:PASS:41:61:35:2:32:0:26:0	0/0:0,-11.1339,-133.296:111:PASS:41:70:25:2:35:0:37:0	0/0:0,-14.416,-175.067:144:PASS:47:116:56:2:64:0:48:0	0/0:0,-15.0409,-178.589:150:PASS:61:118:52:2:69:0:50:0	0/0:0,-3.31038,-41.3991:33:PASS:20:31:18:2:23:0:11:0	0/0:0,-14.1397,-168.191:141:PASS:60:92:66:1:72:0:47:0	0/0:0,-15.6446,-188.591:157:PASS:69:114:51:2:76:0:52:0	0/0:0,-15.9425,-193.488:157:PASS:111:220:103:2:134:0:53:0	0/0:0,-3.00968,-38.6994:30:PASS:8:26:18:2:21:0:10:0	0/0:0,-14.9527,-173.401:150:PASS:58:106:64:2:79:0:50:0	0/0:0,-11.4008,-123.662:114:PASS:37:87:35:2:54:0:38:0	0/0:0,-8.12504,-98.3972:81:PASS:27:58:22:2:38:0:27:0	0/0:0,-3.61064,-42.4983:36:PASS:24:73:24:3:49:0:12:0	0/0:0,-17.1516,-206.793:10000:PASS:53:126:55:2:64:0:57:0	0/0:0,-5.52914,-106.597:55:PASS:28:68:30:2:51:2:30:1	0/0:0,-6.92067,-81.997:69:PASS:44:92:41:2:62:0:23:0	0/0:0,-12.0332,-139.392:120:PASS:41:86:54:2:75:0:40:0	0/0:0,-4.81445,-58.098:48:PASS:23:69:32:3:42:0:16:0	0/0:0,-1.8055,-21.6993:18:PASS:30:56:23:2:36:0:6:0	0/0:0,-12.0364,-144.895:120:PASS:38:86:37:2:58:0:40:0	0/0:0,-7.52313,-91.9974:75:PASS:28:49:15:2:31:0:25:0	0/0:0,-9.92907,-119.595:99:PASS:68:154:74:2:107:0:33:0	0/0:0,-5.41416,-61.8956:54:PASS:17:58:29:3:44:0:18:0	0/0:0,-3.00892,-35.6986:30:PASS:37:61:22:2:40:0:10:0	0/0:0,-9.61938,-109.686:96:PASS:32:70:47:2:67:0:32:0	0/0:0,-7.52239,-89.9966:75:PASS:26:58:16:3:38:0:25:0	0/0:0,-9.02689,-108.196:90:PASS:18:67:26:3:51:0:30:0	0/0:0,-8.42301,-97.3942:84:PASS:31:79:28:3:49:0:28:0	0/0:0,-7.82011,-91.5933:78:PASS:34:47:33:1:42:0:26:0
Chr02	45098056	45146371	INV00047363	48315	0.978814	0.0211864	0	0	PASS	PRECISE	INV	60	-2,2	-2,2	ACAAAAGTTTGCTGCCCACCGGACCTAGCTAAACAGTATCGCGAGAAGTTACAGGTTTGTTACTCTTCTCTTGAACATCTCTTGTTTTGAGATTTGTCATTGGTATGATGCTTGTAGCCCTGCTAATTGGATTGGTGTTAATGGTTCTAGTGGATTGGTTTAAGAATGGAGCTGCGTCAATTTGGTGGGTAATGGATTGAAAAGCTATTTGGGTTGTTT	0/0:0,-1.50486,-19.4997:15:PASS:513:1228:685:2:8:0:5:0	0/0:0,-12.3272,-141.085:123:PASS:3558:6690:4039:2:46:0:41:0	0/0:0,-13.534,-161.188:135:PASS:3585:6373:4033:2:62:0:45:0	0/0:0,-11.1325,-131.794:111:PASS:2982:5959:3470:2:42:0:37:0	0/0:0,-2.70848,-33.7992:27:PASS:811:1775:1013:2:17:0:9:0	0/0:0,-8.12416,-95.9963:81:PASS:3029:4923:3206:2:29:0:27:0	0/0:0,-12.6363,-149.393:126:PASS:2921:4985:3215:2:37:0:42:0	0/0:0,-12.6382,-154.295:126:PASS:3322:6256:4004:2:53:0:42:0	0/0:0,-15.3419,-178.589:154:PASS:4339:8002:4277:2:76:0:51:0	0/0:0,-1.50479,-19.0996:15:PASS:740:1581:860:2:21:0:5:0	0/0:0,-12.6337,-148.39:126:PASS:4622:8193:5078:2:58:0:42:0	0/0:0,-14.7397,-167.489:147:PASS:3984:7768:4583:2:60:1:49:0	0/0:0,-14.7437,-181.193:147:PASS:8231:14776:8868:2:108:0:49:0	0/0:0,-1.80589,-23.7997:18:PASS:690:1464:808:2:8:0:6:0	0/0:0,-13.5331,-157.487:135:PASS:3548:6936:4136:2:58:0:45:0	0/0:0,-8.72547,-103.596:87:PASS:2287:4439:2314:2:37:0:29:0	0/0:0,-6.01547,-69.1949:60:PASS:2265:4064:2316:2:32:0:20:0	0/0:0,-6.61674,-77.3941:66:PASS:1990:4137:2067:2:34:1:22:0	0/0:0,-15.1826,-183.83:152:PASS:4205:7021:4611:2:48:0:51:0	0/0:0,-2.42214,-86.5942:24:PASS:2299:4417:2342:2:39:2:26:2	0/0:0,-11.7302,-135.89:117:PASS:4173:7193:4479:2:56:0:39:0	0/0:0,-8.124,-96.6962:81:PASS:2569:4955:2777:2:53:0:27:0	0/0:0,-9.01981,-104.289:90:PASS:3019:4864:3265:2:31:0:30:0	0/0:0,-6.61357,-75.3909:66:PASS:1971:3721:2025:2:31:0:22:0	0/0:0,-9.02586,-107.795:90:PASS:2280:4459:2327:2:43:0:30:0	0/0:0,-5.71606,-66.3965:57:PASS:1757:3396:1823:2:23:0:19:0	0/0:0,-26.4735,-312.283:10000:PASS:5287:10580:5430:2:94:1:88:0	0/0:0,-8.12156,-95.0938:81:PASS:2152:4299:2222:2:40:0:27:0	0/0:0,-7.09325,-80.1685:71:PASS:2035:3926:2128:2:29:0:24:0	0/0:0,-8.42426,-99.5954:84:PASS:2375:4545:2399:2:48:0:28:0	0/0:0,-8.1191,-94.0913:81:PASS:1750:3411:1983:2:31:1:27:0	0/0:0,-6.61861,-78.0959:66:PASS:2156:4005:2050:2:43:0:22:0	0/0:0,-8.42579,-102.197:84:PASS:2443:4712:2444:2:51:0:28:0	0/0:0,-5.71694,-68.7974:57:PASS:2070:4066:2042:2:34:0:19:0
Chr02	45683252	45699502	DUP00019568	16250	0.995763	0.00423729	0	0	PASS	PRECISE	DUP	60	-1,1	-1,1	GAAGGTGCCATGGCGTTCGCGCACGAGGAGAAGGAAGATGTGCTGTTCAGGTATTTCACCGAGATCATGGGCACAGCTGTGCAAAGAAGCGAAACCATCGACCTGAACAGCAAATCTGTATCCAATCAAACAATTGCTACAACATATATTTTGACCATCAATACCCTTTTTTTAAACAAATCGGTAGAAGAGC	0/0:0,-1.8056,-22.0994:18:PASS:234:456:189:2:13:0:6:0	0/0:0,-10.8137,-121.977:108:PASS:1219:3042:1207:3:61:0:36:0	0/0:0,-14.3908,-163.541:144:PASS:1376:2967:1164:2:70:1:48:0	0/0:0,-10.2274,-115.792:102:PASS:1059:2480:1024:2:47:0:34:0	0/0:0,-2.70853,-34.0993:27:PASS:392:669:299:2:21:0:9:0	0/0:0,-9.32862,-112.497:93:PASS:997:2462:1036:2:39:0:31:0	0/0:0,-8.42513,-99.9963:84:PASS:1092:2467:1018:2:37:0:28:0	0/0:0,-11.1311,-131.293:111:PASS:1248:2824:1124:2:54:0:37:0	0/0:0,-15.938,-183.683:157:PASS:1534:2419:1399:2:64:0:53:0	0/0:0,-2.40756,-30.2993:24:PASS:353:473:280:1:13:0:8:0	0/0:0,-11.1156,-131.777:111:PASS:1510:3601:1411:2:60:0:37:0	0/0:0,-15.3409,-178.088:154:PASS:1559:3314:1305:2:69:2:51:0	0/0:0,-15.6456,-190.792:157:PASS:2794:6473:2610:2:101:0:52:0	0/0:0,-1.80551,-21.7993:18:PASS:312:559:273:2:16:0:6:0	0/0:0,-11.4259,-130.587:114:PASS:1426:2973:1204:2:54:0:38:0	0/0:0,-6.91888,-81.2952:69:PASS:898:1012:697:1:36:0:23:0	0/0:0,-7.82361,-93.7968:78:PASS:788:1758:717:2:37:0:26:0	0/0:0,-6.015,-68.3944:60:PASS:788:1067:602:2:31:1:20:0	0/0:0,-12.9356,-154.191:129:PASS:1388:2624:1366:2:50:0:43:0	0/0:0,-8.72603,-103.996:87:PASS:809:2423:743:3:34:0:29:0	0/0:0,-8.41802,-96.4892:84:PASS:1325:2829:1188:2:45:0:28:0	0/0:0,-9.30021,-104.068:93:PASS:892:2372:856:3:42:0:31:0	0/0:0,-9.92461,-112.891:99:PASS:911:1717:1003:2:48:0:33:0	0/0:0,-6.91481,-78.4911:69:PASS:689:1036:586:2:29:0:23:0	0/0:0,-10.217,-118.682:102:PASS:956:1370:747:2:41:0:34:0	0/0:0,-6.9207,-82.797:69:PASS:624:1079:574:2:31:0:23:0	0/0:0,-16.8307,-197.073:10000:PASS:1856:3545:1720:2:83:0:56:0	0/0:0,-8.12241,-94.9946:81:PASS:740:1389:727:2:40:0:27:0	0/0:0,-6.92161,-84.9979:69:PASS:839:1434:634:2:31:0:23:0	0/0:0,-8.92551,-102.095:89:PASS:860:1624:747:2:43:0:30:0	0/0:0,-5.71519,-66.0956:57:PASS:786:926:578:1:28:0:19:0	0/0:0,-5.71391,-65.6943:57:PASS:686:1958:682:3:24:0:19:0	0/0:0,-6.61959,-79.0969:66:PASS:908:1682:803:2:44:0:22:0	0/0:0,-6.9198,-82.7961:69:PASS:756:1651:725:2:39:0:23:0
Chr02	46256497	46259044	DEL00037090	2547	0.995763	0	0.00423729	0	PASS	PRECISE	DEL	60	-1,1	-1,1	ATTTGACGAATGAAATTCAGAACAAGTGTGAAATACATATGTGGGATTTCTTTTTGTTACATTTATTATACTTAACATGGTGGTTCAAACGGAATAAAAAAATGGGCAACTCATCAAACAAATGGGCAATTCGCAGTCTTATACAATAATAGAGTTTCGAACGATCATATACCCCACCTCATCTTCCTCTTATCCATATTTTTCGCATTT	0/0:0,-2.10671,-26.8995:21:PASS:25:62:36:2:11:0:7:0	0/0:0,-11.7318,-137.392:117:PASS:177:373:161:2:41:0:39:0	0/0:0,-13.2228,-152.277:132:PASS:174:315:153:2:43:0:44:0	0/0:0,-10.2296,-120.295:102:PASS:134:317:151:2:32:0:34:0	0/0:0,-2.40747,-29.5992:24:PASS:53:89:57:2:18:0:8:0	0/0:0,-6.62022,-79.4976:66:PASS:186:296:118:2:12:0:22:0	0/0:0,-10.2316,-123.697:102:PASS:170:320:105:2:23:1:34:0	0/0:0,-13.2356,-155.29:132:PASS:155:311:144:2:30:0:44:0	0/0:0,-14.7325,-170.682:147:PASS:234:442:201:2:65:0:49:0	0/0:0,-2.10675,-26.9995:21:PASS:38:85:42:2:19:0:7:0	0/0:0,-14.7267,-169.676:147:PASS:216:457:193:2:37:0:49:0	0/0:0,-14.1094,-160.361:141:PASS:195:397:192:2:43:0:47:0	0/0:0,-15.6462,-190.993:157:PASS:382:847:461:2:83:1:52:0	0/0:0,-1.50472,-18.6996:15:PASS:36:71:42:2:13:0:5:0	0/0:0,-12.9363,-152.092:129:PASS:175:367:175:2:44:0:43:0	0/0:0,-7.81413,-86.3873:78:PASS:105:210:115:2:46:0:26:0	0/0:0,-7.52233,-89.4966:75:PASS:117:221:108:2:38:0:25:0	0/0:0,-7.82301,-93.5962:78:PASS:84:189:103:2:34:0:26:0	0/0:0,-14.4369,-170.587:144:PASS:161:387:209:2:31:0:48:0	0/0:0,-7.51073,-86.485:75:PASS:142:242:119:2:45:2:25:0	0/0:0,-17.449,-205.689:10000:PASS:159:327:149:2:57:0:58:0	0/0:0,-6.92088,-82.4972:69:PASS:145:271:133:2:48:1:23:0	0/0:0,-7.8238,-94.997:78:PASS:80:227:113:2:27:0:26:0	0/0:0,-8.72379,-101.694:87:PASS:86:176:109:2:36:0:29:0	0/0:0,-9.93059,-120.797:99:PASS:114:252:124:2:48:0:33:0	0/0:0,-7.21824,-82.5935:72:PASS:97:193:111:2:33:0:24:0	0/0:0,-18.0374,-211.876:10000:PASS:207:444:292:2:62:0:60:0	0/0:0,-6.01561,-68.895:60:PASS:70:201:119:2:35:0:20:0	0/0:0,-6.61434,-76.3917:66:PASS:74:178:92:2:23:0:22:0	0/0:0,-8.42037,-96.5915:84:PASS:135:251:99:2:53:0:28:0	0/0:0,-6.61951,-77.7969:66:PASS:68:156:77:2:23:0:22:0	0/0:0,-8.12242,-95.7946:81:PASS:75:177:94:2:29:0:27:0	0/0:0,-7.82052,-90.9937:78:PASS:125:243:111:2:36:0:26:0	0/0:0,-8.72551,-103.296:87:PASS:100:212:108:2:44:0:29:0
Chr02	46362279	47346417	INV00047644	984138	0.970339	0.00423729	0.0254237	0	PASS	PRECISE	INV	60	-5,5	-5,5	TTCCAATTTTATTTCTGAATGAGATCTTGGAGTGAGCAATATTGTGTGAGGTGATCTTTTCATGACATTAATTGTTGCAAACTAACATGATCAAGTGATTATCTTAGAAATTCTTGATCGAAGACGTCTAACTAGTATGTCTATCTCAGTAGCTTAAGGTCGTAGTTGGCATGGAGGTGATCTATGGAGCTCTTATAAGCAGGAAAGCTTGCTGTTGGGGCTTTTGGGTA	0/0:0,-1.5046,-18.4995:15:PASS:12879:27796:12690:2:14:0:5:0	0/0:0,-9.9247,-112.991:99:PASS:69814:148626:72173:2:57:0:33:0	0/0:0,-10.8318,-128.495:108:PASS:68272:146950:68898:2:50:0:36:0	0/0:0,-9.92338,-115.289:99:PASS:61262:129399:62886:2:51:0:33:0	0/0:0,-1.80584,-23.3997:18:PASS:18797:41026:18449:2:13:0:6:0	0/0:0,-6.01823,-71.5976:60:PASS:54765:114307:57067:2:27:0:20:0	0/0:0,-5.71745,-68.4979:57:PASS:54726:114399:57346:2:28:0:19:0	0/0:0,-9.92754,-116.794:99:PASS:67284:143243:68358:2:42:0:33:0	0/0:0,-12.0272,-137.686:120:PASS:82074:179623:88059:2:55:0:40:0	0/0:0,-1.50449,-18.5993:15:PASS:16533:37339:17211:2:15:0:5:0	0/0:0,-12.9365,-155.492:129:PASS:85745:185461:88978:2:59:0:43:0	0/0:0,-13.5339,-158.388:135:PASS:82559:178015:83711:2:65:0:45:0	0/0:0,-15.3376,-187.485:154:PASS:153024:328466:154797:2:113:0:51:0	0/0:0,-1.50467,-18.5995:15:PASS:15548:33985:15266:2:16:0:5:0	0/0:0,-9.6279,-115.195:96:PASS:72396:155985:73920:2:57:0:32:0	0/0:0,-6.31678,-72.4951:63:PASS:45118:97370:46095:2:42:1:21:0	0/0:0,-7.82414,-94.9974:78:PASS:44440:91016:43559:2:40:0:26:0	0/0:0,-6.31719,-74.6956:63:PASS:39929:85532:40906:2:42:0:21:0	1/1:-179.893,-15.0445,0:150:PASS:74811:165706:76845:2:0:38:0:50	0/0:0,-7.2175,-85.5928:72:PASS:46313:95904:47688:2:51:0:24:0	0/0:0,-9.32714,-110.095:93:PASS:69922:149532:72246:2:43:0:31:0	0/0:0,-7.22033,-84.1956:72:PASS:52156:109856:50609:2:43:0:24:0	0/0:0,-6.61568,-74.493:66:PASS:51519:110654:54332:2:26:0:22:0	0/0:0,-8.1231,-95.7953:81:PASS:38335:80936:38871:2:34:0:27:0	0/0:0,-7.22055,-85.6958:72:PASS:46569:99624:47630:2:34:0:24:0	0/0:0,-4.81475,-57.9983:48:PASS:35688:77892:37511:2:32:0:16:0	0/0:0,-16.5481,-198.891:10000:PASS:104469:225988:108790:2:82:0:55:0	0/0:0,-5.1156,-61.7981:51:PASS:42449:90531:43279:2:29:0:17:0	0/0:0,-6.31492,-71.9933:63:PASS:41720:87719:42024:2:28:0:21:0	0/0:0,-8.12143,-96.1936:81:PASS:47902:100356:47867:2:42:0:27:0	0/0:0,-5.41182,-61.5933:54:PASS:35233:76046:35730:2:25:0:18:0	0/0:0,-5.1161,-63.2986:51:PASS:41579:84708:39860:2:31:0:17:0	0/0:0,-10.7838,-123.447:108:PASS:49325:102173:49480:2:50:0:36:0	0/0:0,-6.62051,-80.7979:66:PASS:42767:88495:42574:2:36:0:22:0
Chr02	48081372	48084481	DEL00037532	3109	0.978814	0.0211864	0	0	PASS	PRECISE	DEL	60	-3,3	-3,3	ATATTCTTGCCACTTGTCCTTGTCTTGATGCACCAGCTTTAAAAATTCATCCCAAACAGGAAAAGGATGCAAGCTTAGGTGACATATGCACACCACTGGAGTCATGTAAACCTTGTCCTGTTTTTATGCAATGCAATATGGACCAAGGCTCAAGGGCCCTGGAACTCAGTAGTACTATGATTATGTCTGGTTAGTTAAA	0/0:0,-2.10674,-26.8995:21:PASS:30:111:161:1:17:0:7:0	0/0:0,-12.6361,-150.693:126:PASS:264:517:2168:0:69:1:42:0	0/0:0,-9.627,-114.894:96:PASS:162:450:811:1:54:0:32:0	0/0:0,-11.1247,-126.687:111:PASS:207:436:994:1:50:0:37:0	0/0:0,-2.4077,-30.7995:24:PASS:54:157:236:1:18:0:8:0	0/0:0,-9.62947,-115.497:96:PASS:210:391:1442:0:40:0:32:0	0/0:0,-8.72658,-104.297:87:PASS:192:391:993:1:41:0:29:0	0/0:0,-13.5411,-164.095:135:PASS:232:549:796:1:61:0:45:0	0/0:0,-13.8318,-163.884:138:PASS:284:574:1478:1:65:0:46:0	0/0:0,-1.50484,-19.3997:15:PASS:47:167:208:1:23:0:5:0	0/0:0,-17.0493,-198.791:10000:PASS:318:574:2715:0:74:0:57:0	0/0:0,-16.7704,-192.213:10000:PASS:256:619:1718:1:70:0:56:0	0/0:0,-16.2338,-203.178:10000:PASS:564:1054:1701:1:132:0:54:0	0/0:0,-1.80579,-23.0996:18:PASS:47:146:167:1:22:0:6:0	0/0:0,-13.8381,-163.291:138:PASS:233:557:1242:1:72:0:46:0	0/0:0,-8.72439,-102.595:87:PASS:150:338:620:1:47:4:29:0	0/0:0,-7.21743,-83.6927:72:PASS:130:290:711:1:35:12:24:0	0/0:0,-8.42167,-98.0928:84:PASS:149:288:309:1:38:0:28:0	0/0:0,-12.0362,-144.895:120:PASS:240:480:677:1:58:0:40:0	0/0:0,-2.32896,-101.096:23:PASS:152:365:523:1:50:0:30:2	0/0:0,-14.7436,-176.693:147:PASS:253:476:575:1:70:1:49:0	0/0:0,-11.1268,-128.889:111:PASS:160:383:634:1:53:1:37:0	0/0:0,-9.62825,-116.195:96:PASS:186:293:1134:0:44:0:32:0	0/0:0,-6.31669,-73.9951:63:PASS:115:285:1487:0:35:0:21:0	0/0:0,-10.2313,-124.196:102:PASS:132:348:535:1:54:1:34:0	0/0:0,-4.81283,-55.7963:48:PASS:126:260:552:1:34:4:16:0	0/0:0,-17.4536,-213.294:10000:PASS:379:596:1048:1:85:0:58:0	0/0:0,-7.22044,-84.7957:72:PASS:123:242:811:1:39:5:24:0	0/0:0,-6.61609,-78.6934:66:PASS:138:262:602:1:32:1:22:0	0/0:0,-9.6267,-112.494:96:PASS:146:321:740:1:41:6:32:0	0/0:0,-4.81403,-57.8975:48:PASS:99:252:487:1:27:1:16:0	0/0:0,-6.01811,-72.2975:60:PASS:139:290:428:1:45:0:20:0	0/0:0,-8.12176,-95.1939:81:PASS:139:312:211:2:37:0:27:0	0/0:0,-6.62016,-80.2975:66:PASS:128:302:339:1:33:0:22:0
Chr02	48090469	48098567	DUP00019731	8098	0.995763	0	0.00423729	0	PASS	PRECISE	DUP	60	-5,5	-5,5	AGAAGTGATTTATATGGTTAGCTCCATCACTCTGCAGTTTACACATTGAGCCAATTTGTTACACAAAAATGAAGCCAGATAACACTCCAGCACAAGAAGGGCAGAAGCATGTCAAATAAGCTGACATATCCCAGCAATCACCTGATGCCAGTGTATGCTGCAAGTAAAGGTGATTAAAGAATAATTAGATTCCACAGACATAGCGAATACAATTTGATTTCATCTAATTGAAA	0/0:0,-2.10662,-26.4994:21:PASS:56:205:129:2:9:0:7:0	0/0:0,-14.1158,-163.767:141:PASS:431:1103:588:2:47:0:47:0	0/0:0,-13.5388,-160.092:135:PASS:431:1106:608:2:48:0:45:0	0/0:0,-10.8273,-128.99:108:PASS:417:975:550:2:33:0:36:0	0/0:0,-2.10656,-26.1994:21:PASS:60:277:181:2:16:0:7:0	0/0:0,-9.02758,-108.197:90:PASS:434:926:477:2:24:0:30:0	0/0:0,-9.32754,-109.096:93:PASS:488:869:477:2:26:0:31:0	0/0:0,-10.8279,-128.491:108:PASS:477:1115:549:2:37:0:36:0	0/0:0,-15.347,-188.094:154:PASS:647:1321:726:2:75:0:51:0	0/0:0,-1.50488,-19.5997:15:PASS:67:254:193:2:27:0:5:0	0/0:0,-15.9479,-192.693:157:PASS:560:1386:694:2:41:0:53:0	0/0:0,-16.5484,-198.092:10000:PASS:456:1311:752:2:53:0:55:0	0/0:0,-14.7455,-184.495:147:PASS:614:2431:1291:3:73:0:49:0	0/0:0,-1.50487,-19.4997:15:PASS:47:240:155:2:12:0:5:0	0/0:0,-14.1425,-170.894:141:PASS:399:1111:605:2:45:0:47:0	0/0:0,-6.61177,-74.1891:66:PASS:216:720:431:2:51:0:22:0	0/0:0,-7.52214,-89.3964:75:PASS:304:674:408:2:26:0:25:0	0/0:0,-7.82221,-92.8954:78:PASS:214:584:349:2:24:0:26:0	0/0:0,-10.2287,-120.594:102:PASS:410:1166:597:2:41:0:34:0	0/0:0,-7.22137,-86.6967:72:PASS:289:689:395:2:40:0:24:0	0/0:0,-10.5312,-125.195:105:PASS:357:1091:526:2:28:0:35:0	0/0:0,-9.62674,-113.094:96:PASS:229:778:482:2:34:0:32:0	0/0:0,-9.02625,-107.995:90:PASS:365:678:364:2:29:0:30:0	0/0:0,-8.42567,-101.497:84:PASS:248:615:352:2:43:0:28:0	0/0:0,-9.92867,-117.695:99:PASS:208:731:455:2:51:0:33:0	0/0:0,-5.71569,-66.1961:57:PASS:173:510:335:2:25:0:19:0	0/0:0,-16.5491,-196.393:10000:PASS:594:1620:978:2:57:0:55:0	0/0:0,-8.42422,-100.095:84:PASS:249:690:386:2:26:0:28:0	0/0:0,-7.51953,-87.7938:75:PASS:222:655:366:2:25:0:25:0	0/0:0,-8.72336,-102.093:87:PASS:207:663:431:2:36:0:29:0	0/0:0,-6.31587,-74.5942:63:PASS:136:516:343:2:22:0:21:0	0/0:0,-6.92014,-82.4965:69:PASS:196:649:375:2:31:0:23:0	0/0:0,-8.4246,-99.8958:84:PASS:221:656:396:2:30:0:28:0	0/0:0,-6.01762,-71.197:60:PASS:189:634:370:2:23:0:20:0
Chr03	1284461	1324965	INV00048873	40504	0.991525	0.00847458	0	0	PASS	PRECISE	INV	60	-4,4	-4,4	TCGTTCCTTTTATTTTATTTAAATACTTGATGCAAAATAATAAATTTACAGAATTTTCCATAAATTTTGGGTGACGTGGTCTAATAAGGGCCAGAGCTTGTCGCTGATTTCTTCTTATAGAGATACGCCTCTAGGAACCAAGCTTTTTTAAAA	0/1:-6.79705,0,-2.59704:26:PASS:387:970:412:2:4:3:1:2	0/0:0,-9.92906,-117.095:99:PASS:3148:5932:2962:2:19:0:33:0	0/0:0,-9.32769,-112.796:93:PASS:3050:5913:3012:2:18:0:31:0	0/1:-26.4746,0,-56.572:10000:PASS:2008:4864:1936:2:10:12:19:10	0/0:0,-1.50465,-18.7995:15:PASS:825:1473:782:2:4:0:5:0	0/0:0,-8.12487,-97.3971:81:PASS:2395:4508:2263:2:15:0:27:0	0/0:0,-7.22129,-85.0966:72:PASS:2392:4673:2383:2:15:0:24:0	0/0:0,-9.3259,-109.694:93:PASS:2922:5433:2750:2:20:0:31:0	0/0:0,-12.3349,-144.193:123:PASS:3806:7223:3560:2:21:0:41:0	0/0:0,-1.50485,-19.3997:15:PASS:753:1334:714:2:5:0:5:0	0/0:0,-11.4294,-130.59:114:PASS:3699:7044:3631:2:26:0:38:0	0/0:0,-12.6362,-148.393:126:PASS:3587:6697:3560:2:23:1:42:0	0/0:0,-10.834,-137.097:108:PASS:6566:12787:6394:2:35:0:36:0	0/0:0,-1.8056,-22.5994:18:PASS:673:1283:679:2:4:0:6:0	0/0:0,-9.92678,-114.993:99:PASS:3202:6008:2951:2:22:0:33:0	0/0:0,-4.8088,-52.4923:48:PASS:2086:3669:1886:2:10:0:16:0	0/0:0,-8.41686,-92.688:84:PASS:1957:3564:1777:2:15:0:28:0	0/0:0,-5.41372,-63.4952:54:PASS:1790:3433:1599:2:12:0:18:0	0/0:0,-12.3354,-147.793:123:PASS:3535:6709:3565:2:27:0:41:0	0/0:0,-6.61547,-76.8928:66:PASS:2088:3861:1948:2:11:0:22:0	0/0:0,-10.8249,-123.688:108:PASS:3539:6421:3293:2:20:0:36:0	0/0:0,-6.91531,-77.7916:69:PASS:2240:4284:2122:2:21:0:23:0	0/0:0,-7.81829,-89.0915:78:PASS:2679:5273:2558:2:16:0:26:0	0/0:0,-3.90946,-44.6961:39:PASS:1697:3184:1593:2:10:0:13:0	0/0:0,-6.62011,-79.9975:66:PASS:1988:3745:1773:2:17:0:22:0	0/0:0,-3.61066,-42.9983:36:PASS:1542:3025:1427:2:8:0:12:0	0/0:0,-17.1489,-201.39:10000:PASS:4723:8852:4327:2:26:0:57:0	0/0:0,-6.01527,-70.1947:60:PASS:1886:3508:1752:2:16:0:20:0	0/0:0,-6.31642,-73.7948:63:PASS:1764:3455:1752:2:15:0:21:0	0/0:0,-5.71511,-65.9955:57:PASS:2010:3926:1899:2:13:0:19:0	0/0:0,-4.51262,-52.0972:45:PASS:1567:3110:1466:2:8:0:15:0	0/0:0,-5.41015,-59.6916:54:PASS:1716:3301:1679:2:10:0:18:0	0/0:0,-5.41207,-60.9935:54:PASS:2108:3936:1909:2:11:0:18:0	0/0:0,-6.31694,-73.9953:63:PASS:1895:3555:1706:2:12:0:21:0
Chr03	1811617	1816400	DEL00038454	4783	0.978814	0.0211864	0	0	PASS	PRECISE	DEL	60	-6,6	-6,6	AACCACCAAACCGGCAGCAGTTTTGATCGAATGCCACTTCTACGATTTGCGACTTGCGAAGTTTTTTTTGTTCCTCTCAAAATGAACTGAGCTGCTAGTTCAGCTAACAGTTCCTCCTACACACTTGTTGGCCGAGCATCAATTTCTGACGAACAGTAATTCGGTACGTACGACAGCGGCGCCTTAAA	0/0:0,-1.80541,-21.8992:18:PASS:58:246:69:4:14:0:6:0	0/0:0,-12.3239,-138.282:123:PASS:398:1170:443:3:60:0:41:0	0/0:0,-12.8369,-144.793:128:PASS:388:1260:458:3:68:0:43:0	0/0:0,-13.148,-143.803:131:PASS:351:1092:380:3:61:0:44:0	0/0:0,-2.10675,-26.9995:21:PASS:94:331:88:4:12:0:7:0	0/0:0,-8.42548,-99.9966:84:PASS:296:788:327:3:30:1:28:0	0/0:0,-9.02689,-106.796:90:PASS:325:786:327:2:35:0:30:0	0/0:0,-9.62545,-112.692:96:PASS:384:1145:427:3:59:0:32:0	0/0:0,-18.6465,-215.983:10000:PASS:496:1242:460:3:61:1:62:0	0/0:0,-1.80504,-20.9989:18:PASS:92:269:92:3:12:0:6:0	0/0:0,-13.9123,-159.864:139:PASS:513:1407:466:3:66:0:47:0	0/0:0,-13.5336,-153.587:135:PASS:466:1459:469:3:63:0:45:0	0/0:0,-16.5457,-193.389:10000:PASS:893:2347:846:3:137:0:55:0	0/0:0,-1.50402,-16.9989:15:PASS:80:302:79:4:14:0:5:0	0/0:0,-14.6928,-167.242:147:PASS:391:1344:460:3:59:0:49:0	0/0:0,-7.51905,-85.0933:75:PASS:211:841:260:4:40:0:25:0	0/0:0,-6.00618,-68.2856:60:PASS:225:469:243:2:36:0:20:0	0/0:0,-6.31237,-67.6907:63:PASS:209:477:223:2:40:0:21:0	0/0:0,-10.8296,-126.893:108:PASS:479:917:438:2:47:0:36:0	0/0:0,-6.91971,-81.696:69:PASS:263:662:269:2:36:2:23:0	0/0:0,-7.21342,-78.9887:72:PASS:328:533:286:2:31:0:24:0	0/0:0,-9.15346,-101.222:92:PASS:268:894:286:3:54:0:31:0	0/0:0,-2.70823,-33.099:27:PASS:246:444:215:2:31:1:9:0	0/0:0,-4.81421,-56.4977:48:PASS:228:481:210:2:28:0:16:0	0/0:0,-6.9184,-79.7947:69:PASS:248:559:232:2:34:0:23:0	0/0:0,-7.81989,-88.1931:78:PASS:190:689:224:3:28:0:26:0	0/0:0,-13.2371,-153.692:132:PASS:632:1253:614:2:78:0:44:0	0/0:0,-7.51737,-84.2916:75:PASS:262:494:236:2:39:0:25:0	0/0:0,-7.21972,-83.395:72:PASS:223:512:243:2:34:0:24:0	0/0:0,-8.41906,-95.3902:84:PASS:236:531:244:2:43:1:28:0	0/0:0,-6.01378,-68.0932:60:PASS:213:580:252:2:31:0:20:0	0/0:0,-5.41141,-62.1929:54:PASS:209:622:212:3:34:0:18:0	0/0:0,-8.37743,-96.0486:84:PASS:244:852:258:3:32:0:28:0	0/0:0,-7.82042,-91.2936:78:PASS:205:478:208:2:38:0:26:0
Chr03	10385121	10386092	DUP00022290	971	0.457627	0.542373	0	0	PASS	PRECISE	DUP	31	-5,5	-5,5	GTGGATGAGGAGTCGTCCGATGAGCAAGACAATTATCCTGTACCACGAAATTGGTCAAATTACGACCATTCCGCCCTACAGGTCAATAGTTAGTAAATTATGATTTTTTGGTTAGGTATTCGAATATAGTTTTTGGGTAATAATATTATATTTG	0/0:0,-1.77125,-17.764:18:PASS:14:47:8:4:17:0:7:0	0/0:0,-8.11544,-93.5876:81:PASS:54:127:55:2:47:0:27:0	0/0:0,-14.4079,-162.958:144:PASS:70:191:67:3:68:0:48:0	0/0:0,-11.1289,-128.791:111:PASS:72:153:54:2:57:0:37:0	0/0:0,-2.34929,-27.4411:23:PASS:20:63:7:5:17:0:8:0	0/0:0,-9.49932,-104.566:95:PASS:43:113:50:2:31:0:32:0	0/0:0,-8.32814,-95.3993:83:PASS:46:100:58:2:29:0:28:0	0/0:0,-7.16132,-82.1366:72:PASS:48:126:56:2:33:0:24:0	0/0:0,-9.31982,-107.588:93:PASS:100:167:60:2:47:0:31:0	0/0:0,-1.50463,-18.6995:15:PASS:25:33:11:2:11:0:5:0	0/0:0,-11.9973,-137.056:120:PASS:90:174:65:2:49:0:40:0	0/0:0,-14.9343,-169.983:149:PASS:84:188:66:3:65:0:50:0	0/0:0,-15.8494,-177.694:157:PASS:172:289:127:2:93:0:54:0	0/0:0,-3.91181,-49.3984:39:PASS:23:44:11:3:16:0:13:0	0/0:0,-12.3343,-149.492:123:PASS:82:175:62:2:60:0:41:0	0/0:0,-6.81994,-76.4962:68:PASS:45:123:37:3:41:0:23:0	0/0:0,-5.25836,-56.2398:53:PASS:46:103:31:3:34:0:18:0	0/1:-32.1194,0,-78.4754:10000:PASS:46:200:36:5:42:20:31:17	0/1:-54.2421,0,-127.621:10000:PASS:82:305:60:4:44:5:44:32	0/1:-17.3945,0,-76.4334:10000:PASS:61:165:48:3:38:12:28:14	0/1:-52.1512,0,-140.817:10000:PASS:113:320:53:4:74:30:55:37	0/0:0,-10.7543,-118.017:108:PASS:56:109:51:2:48:0:36:0	0/1:-8.44215,0,-88.3133:84:PASS:63:222:31:5:42:12:31:12	0/0:0,-7.31428,-73.3875:73:PASS:55:109:30:3:36:0:26:0	0/0:0,-9.89127,-108.656:99:PASS:64:160:23:4:50:0:34:0	0/0:0,-2.51542,-58.6961:25:PASS:45:89:32:2:34:0:18:1	0/1:-68.0392,0,-206.997:10000:PASS:153:481:90:4:97:34:72:42	0/1:-29.5677,0,-71.3:10000:PASS:64:175:46:3:45:15:24:17	0/1:-18.3168,0,-60.8227:10000:PASS:68:198:37:4:47:18:24:13	0/0:0,-6.61734,-75.7947:66:PASS:44:130:32:3:35:0:22:0	0/1:-32.2876,0,-70.0603:10000:PASS:38:159:32:5:28:9:24:17	0/1:-33.1665,0,-49.2468:10000:PASS:34:166:30:5:30:13:18:16	0/0:0,-6.90532,-76.5816:69:PASS:62:102:43:2:34:0:23:0	0/0:0,-7.82016,-92.4934:78:PASS:54:122:45:2:39:0:26:0
Chr03	10403165	10407592	DEL00042419	4427	0.983051	0.0169492	0	0	PASS	PRECISE	DEL	36	-6,6	-6,6	CATTCTCCCTGTACTCCCAAAGGATATTTTCCCCTACATTGACCTGAAGCATATGGCACTCTACTCATGTGATCCCGCTCATCAGTAGTCGAAGGACACTGAGTTTTGCTAAGGTGTATGCCATGTGATATAGGCCAGAACCCTTTCTTCGCCTCTTCCATGTT	0/0:0,-1.50473,-18.5996:15:PASS:44:132:74:2:11:0:5:0	0/0:0,-11.6363,-130.296:116:PASS:359:644:329:2:53:0:39:0	0/0:0,-11.1253,-134.387:111:PASS:349:656:400:2:66:0:37:0	0/0:0,-10.2086,-116.774:102:PASS:323:645:337:2:55:0:34:0	0/0:0,-2.10546,-25.5982:21:PASS:71:158:106:2:13:0:7:0	0/0:0,-9.0274,-107.596:90:PASS:286:493:272:2:36:0:30:0	0/0:0,-9.62932,-114.996:96:PASS:299:521:296:2:34:0:32:0	0/0:0,-12.9311,-150.587:129:PASS:345:650:369:2:60:0:43:0	0/0:0,-14.5609,-169.81:146:PASS:379:893:461:2:75:0:49:0	0/0:0,-2.70725,-32.898:27:PASS:64:156:89:2:11:0:9:0	0/0:0,-14.4425,-172.993:144:PASS:429:825:481:2:76:0:48:0	0/0:0,-12.6365,-148.093:126:PASS:396:766:449:2:63:0:42:0	0/0:0,-13.8248,-166.777:138:PASS:738:1389:751:2:116:1:46:0	0/0:0,-1.50475,-18.9996:15:PASS:79:134:86:2:11:0:5:0	0/0:0,-10.2282,-120.893:102:PASS:328:713:409:2:59:0:34:0	0/0:0,-5.41468,-62.1961:54:PASS:191:453:215:2:39:0:18:0	0/0:0,-8.02038,-91.0926:80:PASS:203:439:215:2:35:0:27:0	0/0:0,-3.6063,-41.2939:36:PASS:195:170:11:2:15:0:12:0	0/0:0,-9.62958,-116.897:96:PASS:228:502:326:2:39:0:32:0	0/0:0,-8.04933,-88.9215:80:PASS:205:402:367:1:35:0:27:0	0/0:0,-3.00907,-36.0988:30:PASS:227:237:22:2:15:1:10:0	0/0:0,-7.82131,-90.6945:78:PASS:252:503:306:2:44:0:26:0	0/0:0,-6.31883,-75.9972:63:PASS:188:333:194:2:37:0:21:0	0/0:0,-6.61394,-76.1913:66:PASS:192:397:196:2:38:0:22:0	0/0:0,-4.50526,-53.0898:45:PASS:118:149:194:1:21:0:15:0	0/0:0,-5.11287,-58.4954:51:PASS:164:393:179:2:33:1:17:0	0/0:0,-7.52212,-90.7964:75:PASS:495:526:43:2:48:0:25:0	0/0:0,-3.00833,-34.798:30:PASS:197:196:10:2:17:0:10:0	0/0:0,-3.5654,-40.953:36:PASS:213:203:25:2:17:0:12:0	0/0:0,-7.82092,-90.8941:78:PASS:207:450:246:2:39:0:26:0	0/0:0,-3.61114,-43.9988:36:PASS:179:175:27:2:20:0:12:0	0/0:0,-4.77488,-53.2584:48:PASS:206:195:11:2:19:0:16:0	0/0:0,-7.22032,-84.6956:72:PASS:226:451:215:2:39:0:24:0	0/0:0,-8.11405,-93.9862:81:PASS:200:430:273:2:34:0:27:0
Chr03	10523659	10528120	DUP00022355	4461	0.995763	0.00423729	0	0	PASS	PRECISE	DUP	60	-6,6	-6,6	TTTGATCATGCAAGCCAACAAACTCAAAAACATAGGTAGGATACTCAGTTGTAGCAAGACATATGAGAGGAAATAAATAGAAAAACTCTGAAGTTGGATGTTTTGAACAAACTGAAAACAAATATCCCAATAATGTTGTGCAAGCTTGAGAAATTTTTCCCTCCTACCTTCTT	0/0:0,-2.10668,-26.4995:21:PASS:56:179:58:3:17:0:7:0	0/0:0,-11.7343,-139.994:117:PASS:349:777:324:2:53:0:39:0	0/0:0,-14.3681,-171.119:144:PASS:339:798:302:2:59:0:48:0	0/0:0,-10.5317,-127.296:105:PASS:337:678:311:2:44:0:35:0	0/0:0,-2.10684,-27.4996:21:PASS:88:197:73:2:18:0:7:0	0/0:0,-9.62861,-113.596:96:PASS:299:586:278:2:36:0:32:0	0/0:0,-8.42447,-99.2956:84:PASS:306:564:287:2:32:0:28:0	0/0:0,-12.3356,-149.893:123:PASS:351:820:335:2:54:0:41:0	0/0:0,-14.6963,-171.846:147:PASS:420:872:406:2:60:0:49:0	0/0:0,-2.70854,-34.3993:27:PASS:82:168:77:2:17:0:9:0	0/0:0,-13.5398,-164.093:135:PASS:446:952:410:2:60:0:45:0	0/0:0,-18.6493,-215.785:10000:PASS:460:879:362:2:73:0:62:0	0/0:0,-14.1378,-172.489:141:PASS:720:1594:714:2:124:0:47:0	0/0:0,-2.40773,-30.7995:24:PASS:79:162:51:2:15:0:8:0	0/0:0,-17.4525,-210.893:10000:PASS:387:844:303:2:72:0:58:0	0/0:0,-7.22076,-84.396:72:PASS:267:437:197:2:42:0:24:0	0/0:0,-7.82099,-90.6942:78:PASS:237:478:186:2:38:0:26:0	0/0:0,-7.22124,-85.7965:72:PASS:206:391:143:2:26:0:24:0	0/0:0,-9.92978,-120.496:99:PASS:375:632:286:2:44:0:33:0	0/0:0,-7.82335,-93.4966:78:PASS:240:433:190:2:30:0:26:0	0/0:0,-10.8303,-127.393:108:PASS:225:577:289:2:53:0:36:0	0/0:0,-9.59905,-109.866:96:PASS:307:570:230:2:48:0:32:0	0/0:0,-6.01848,-73.6979:60:PASS:188:410:229:2:29:0:20:0	0/0:0,-7.52016,-86.3944:75:PASS:217:426:171:2:34:0:25:0	0/0:0,-9.62975,-117.297:96:PASS:241:479:165:2:43:0:32:0	0/0:0,-5.71565,-66.4961:57:PASS:178:359:139:2:27:0:19:0	0/0:0,-16.8438,-199.985:10000:PASS:526:1102:426:2:72:0:57:0	0/0:0,-8.42385,-100.895:84:PASS:221:432:169:2:34:0:28:0	0/0:0,-8.07774,-94.7499:81:PASS:209:453:158:2:32:0:27:0	0/0:0,-8.12247,-94.2947:81:PASS:233:446:225:2:42:0:27:0	0/0:0,-6.18275,-69.0611:62:PASS:169:399:129:3:31:0:21:0	0/0:0,-5.97208,-68.2515:60:PASS:196:411:170:2:34:0:20:0	0/0:0,-8.12444,-97.1966:81:PASS:260:470:157:2:31:0:27:0	0/0:0,-6.92116,-84.2975:69:PASS:214:390:196:2:33:0:23:0
Chr03	14890916	14894404	DUP00023407	3488	0.995763	0.00423729	0	0	PASS	PRECISE	DUP	60	-5,5	-5,5	CATCATGAGAATGTTTCCGTGATGAATGAACAAATACGGTCAATTGGGTGGCGAGCTCGCGGGAAACATCTTAGCAGCAGGTGTCTCCGTCCCCGTGCCCCCCTGTGGCCCCTCTTCACACGTCATATTCATGGATGCGATGTAATTTAGACTTACATTCACTGCTGCCTCAATAGACTATCTTCTATATGCTCTTCCAACCTAAATTACATTTAGAAGATGAGATTACC	0/0:0,-3.00979,-39.3995:30:PASS:63:80:53:1:14:0:10:0	0/0:0,-10.531,-126.095:105:PASS:265:479:264:2:60:0:35:0	0/0:0,-14.7348,-170.184:147:PASS:321:528:303:2:72:0:49:0	0/0:0,-9.6249,-110.292:96:PASS:272:380:251:1:45:0:32:0	0/0:0,-2.4077,-30.8995:24:PASS:87:124:76:2:21:0:8:0	0/0:0,-9.32873,-112.497:93:PASS:225:384:248:2:35:0:31:0	0/0:0,-11.1336,-131.896:111:PASS:227:391:232:2:40:0:37:0	0/0:0,-12.3352,-147.293:123:PASS:271:476:294:2:58:0:41:0	0/0:0,-11.7269,-132.587:117:PASS:296:624:333:2:57:5:39:0	0/0:0,-1.80583,-23.2996:18:PASS:65:110:67:2:13:0:6:0	0/0:0,-15.3452,-183.193:154:PASS:374:641:372:2:74:0:51:0	0/0:0,-14.741,-177.791:147:PASS:344:552:307:2:71:0:49:0	0/0:0,-14.7426,-184.192:147:PASS:639:972:647:2:118:3:49:0	0/0:0,-1.50469,-18.4995:15:PASS:66:96:66:1:13:0:5:0	0/0:0,-13.8358,-160.288:138:PASS:296:438:276:2:62:0:46:0	0/0:0,-9.02101,-101.99:90:PASS:187:293:207:1:44:0:30:0	0/0:0,-8.12289,-95.8951:81:PASS:159:280:161:2:40:0:27:0	0/0:0,-6.60572,-73.5831:66:PASS:158:281:158:2:37:0:22:0	0/0:0,-9.92871,-118.495:99:PASS:359:570:276:2:37:0:33:0	0/0:0,-8.1211,-95.5933:81:PASS:178:301:161:2:45:0:27:0	0/0:0,-14.7415,-175.091:147:PASS:304:602:304:2:70:0:49:0	0/0:0,-8.41991,-95.7911:84:PASS:203:392:224:2:47:0:28:0	0/0:0,-9.92923,-118.795:99:PASS:205:436:267:2:45:0:33:0	0/0:0,-8.42146,-98.7926:84:PASS:158:279:148:2:23:0:28:0	0/0:0,-9.02551,-106.595:90:PASS:180:336:189:2:31:1:30:0	0/0:0,-6.01656,-69.096:60:PASS:166:226:140:1:27:0:20:0	0/0:0,-17.4483,-207.189:10000:PASS:434:746:438:2:83:0:58:0	0/0:0,-9.92819,-117.794:99:PASS:158:316:185:2:39:0:33:0	0/0:0,-6.31678,-74.7951:63:PASS:177:310:168:2:32:0:21:0	0/0:0,-8.41713,-95.3883:84:PASS:180:357:190:2:30:0:28:0	0/0:0,-6.62018,-79.8975:66:PASS:178:243:164:1:32:0:22:0	0/0:0,-6.01738,-71.6968:60:PASS:141:279:162:2:29:0:20:0	0/0:0,-9.62208,-109.689:96:PASS:181:301:186:2:41:0:32:0	0/0:0,-6.31558,-74.094:63:PASS:177:259:164:2:33:0:21:0
Chr03	15105752	15117221	DUP00023465	11469	0.995763	0.00423729	0	0	PASS	PRECISE	DUP	60	-3,3	-3,3	TTCGTTCATGACCAGGGATTTAAGCGACAACTCATTTTCTGCTCTGTGAACACGCACCTTTATATCCTGGTAAAGCTGG	0/0:0,-1.50216,-17.697:15:PASS:185:342:145:2:12:0:5:0	0/0:0,-12.0339,-140.393:120:PASS:937:1847:878:2:68:0:40:0	0/0:0,-11.7337,-141.294:117:PASS:990:1894:862:2:72:0:39:0	0/0:0,-12.0349,-141.494:120:PASS:853:1548:723:2:56:0:40:0	0/0:0,-3.00961,-38.1993:30:PASS:317:514:212:2:24:0:10:0	0/0:0,-9.92993,-119.296:99:PASS:753:1441:564:2:44:0:33:0	0/0:0,-6.62047,-80.1978:66:PASS:758:1495:625:2:34:0:22:0	0/0:0,-15.9438,-188.289:157:PASS:982:1855:846:2:75:0:53:0	0/0:0,-15.9379,-181.883:157:PASS:1094:2144:858:2:75:0:53:0	0/0:0,-3.00955,-37.7993:30:PASS:261:469:175:2:17:0:10:0	0/0:0,-13.5345,-158.288:135:PASS:1252:2328:987:2:78:0:45:0	0/0:0,-15.9412,-187.887:157:PASS:1154:2210:899:2:80:0:53:0	0/0:0,-15.3468,-190.694:154:PASS:2024:4067:1739:2:120:0:51:0	0/0:0,-3.31059,-42.1993:33:PASS:236:464:167:2:26:0:11:0	0/0:0,-13.2384,-157.493:132:PASS:1075:1992:863:2:71:0:44:0	0/0:0,-9.62829,-113.395:96:PASS:662:1177:633:2:48:0:32:0	0/0:0,-9.02541,-106.495:90:PASS:571:1189:514:2:48:0:30:0	0/0:0,-6.61848,-77.8958:66:PASS:561:1001:446:2:38:0:22:0	0/0:0,-16.2454,-193.29:10000:PASS:1309:2045:932:2:67:0:54:0	0/0:0,-9.02748,-108.897:90:PASS:639:1223:557:2:49:0:30:0	0/0:0,-12.6337,-146.89:126:PASS:960:1980:860:2:73:0:42:0	0/0:0,-8.42535,-100.797:84:PASS:716:1313:627:2:55:0:28:0	0/0:0,-10.5295,-123.993:105:PASS:827:1442:736:2:48:0:35:0	0/0:0,-8.42273,-96.0939:84:PASS:508:1015:460:2:45:0:28:0	0/0:0,-8.72631,-105.596:87:PASS:634:1175:551:2:48:0:29:0	0/0:0,-4.8135,-57.097:48:PASS:471:938:419:2:36:0:16:0	0/0:0,-19.2511,-230.185:10000:PASS:1329:2802:1317:2:114:0:64:0	0/0:0,-7.52109,-88.8953:75:PASS:580:1063:521:2:40:0:25:0	0/0:0,-6.31751,-73.8959:63:PASS:542:1100:576:2:43:0:21:0	0/0:0,-8.12406,-97.6962:81:PASS:585:1184:580:2:46:0:27:0	0/0:0,-7.52256,-89.8968:75:PASS:489:967:419:2:39:0:25:0	0/0:0,-4.2089,-47.3945:42:PASS:502:1080:475:2:33:0:14:0	0/0:0,-7.21965,-85.5949:72:PASS:594:1238:573:2:45:0:24:0	0/0:0,-7.52324,-92.0975:75:PASS:541:1080:468:2:40:0:25:0
Chr03	15253278	15256079	DEL00044522	2801	0.995763	0.00423729	0	0	PASS	PRECISE	DEL	60	-3,3	-3,3	TGGTATCATCATAATAGGTAACAGTCACAAAGTTCCTTGTAACCCAGAGGATACTTCTACAATTTCATCAATGAAATCCTTGAAATTGCACATGTCTGAGTCAACAACCATGATTGTTTAAAACTGATGATGTTTGCTTGCTGGCTTCAAAGTTCCATCCTATTGGTTTTACTGAAAAGGAAAGAAATTAAAACATTACGAGCTC	0/0:0,-2.70855,-34.3993:27:PASS:15:122:46:4:13:0:9:0	0/0:0,-16.8387,-198.181:10000:PASS:62:512:216:4:61:0:56:0	0/0:0,-17.4337,-202.374:10000:PASS:58:521:222:4:71:0:58:0	0/0:0,-15.6444,-184.991:157:PASS:65:495:243:3:60:0:52:0	0/0:0,-3.30987,-41.6985:33:PASS:15:165:76:4:25:0:11:0	0/0:0,-8.42442,-98.9956:84:PASS:83:333:163:3:36:1:28:0	0/0:0,-12.6388,-152.196:126:PASS:78:364:162:3:45:0:42:0	0/0:0,-16.8497,-202.392:10000:PASS:77:510:217:3:59:0:56:0	0/0:0,-14.4424,-171.993:144:PASS:63:573:245:4:57:0:48:0	0/0:0,-3.00975,-39.1994:30:PASS:15:138:61:4:18:0:10:0	0/0:0,-17.1521,-208.493:10000:PASS:79:610:261:4:77:0:57:0	0/0:0,-20.1596,-244.591:10000:PASS:79:619:298:3:83:0:67:0	0/0:0,-18.9509,-234.086:10000:PASS:111:1211:459:4:121:0:63:0	0/0:0,-2.4071,-29.8989:24:PASS:11:153:70:4:20:0:8:0	0/0:0,-18.3535,-218.091:10000:PASS:79:557:261:3:84:0:61:0	0/0:0,-9.32559,-109.194:93:PASS:30:406:147:5:46:0:31:0	0/0:0,-12.0302,-142.089:120:PASS:32:314:164:3:42:0:40:0	0/0:0,-11.1291,-130.391:111:PASS:20:308:131:4:41:0:37:0	0/0:0,-14.1421,-169.894:141:PASS:80:405:205:3:54:0:47:0	0/0:0,-6.9208,-83.3971:69:PASS:23:306:155:3:34:0:23:0	0/0:0,-9.92724,-116.093:99:PASS:25:366:224:3:35:0:33:0	0/0:0,-12.0283,-138.687:120:PASS:32:418:185:4:50:0:40:0	0/0:0,-10.8321,-131.195:108:PASS:29:297:169:3:29:0:36:0	0/0:0,-8.72577,-103.996:87:PASS:23:256:142:3:31:0:29:0	0/0:0,-9.32714,-112.195:93:PASS:32:326:167:3:32:0:31:0	0/0:0,-6.61526,-76.3926:66:PASS:21:227:135:3:33:0:22:0	0/0:0,-31.5951,-381.887:10000:PASS:63:727:392:3:90:1:105:0	0/0:0,-11.7263,-133.586:117:PASS:30:298:140:4:40:0:39:0	0/0:0,-9.3258,-109.094:93:PASS:24:295:130:4:25:0:31:0	0/0:0,-8.12134,-94.2935:81:PASS:23:250:154:3:40:0:27:0	0/0:0,-7.5229,-90.8972:75:PASS:37:240:116:3:29:0:25:0	0/0:0,-5.41503,-63.2965:54:PASS:30:254:141:3:35:0:18:0	0/0:0,-11.4341,-136.595:114:PASS:28:368:154:4:37:1:38:0	0/0:0,-5.1129,-58.1954:51:PASS:26:285:133:4:32:0:17:0
Chr03	15445397	15452379	INV00057185	6982	0.20339	0.79661	0	0	PASS	PRECISE	INV	23	-2,2	-2,2	CATCTGCATTGTTTGGGGTTGCTATTGTAGATGTAATGCCCCTAGCAAATTCAGGGGCTGTTTGGATATGAGGTGCTAAACTTTAGCAGTGTCACATCGGATGTTTAGATGCTAATTAGGAGGACTAAACATGAGCTAATTATAAAACTAATTGCA	0/1:-13.294,0,-5.49414:55:PASS:122:152:109:1:2:5:2:4	0/1:-62.9607,0,-54.523:10000:PASS:503:1070:465:2:15:15:19:23	0/1:-73.1014,0,-61.5597:10000:PASS:629:860:548:1:15:18:21:24	0/1:-43.9718,0,-44.471:10000:PASS:525:790:414:2:10:11:16:15	0/1:-11.6903,0,-19.6901:117:PASS:162:211:163:1:7:10:6:4	0/1:-51.9675,0,-48.6677:10000:PASS:410:791:385:2:5:12:16:17	0/1:-43.7681,0,-54.6679:10000:PASS:417:761:413:2:8:16:18:15	0/1:-70.6031,0,-60.8579:10000:PASS:558:817:493:2:11:9:21:23	0/1:-63.7574,0,-70.1564:10000:PASS:619:1072:582:2:13:0:24:22	0/1:-16.19,0,-16.4901:10000:PASS:167:158:131:1:3:0:5:5	0/1:-118.134,0,-80.5401:10000:PASS:648:1174:623:2:13:14:28:40	0/1:-85.3485,0,-84.5459:10000:PASS:665:1081:607:2:15:36:29:29	0/1:-54.6574,0,-82.9573:10000:PASS:1208:2321:1090:2:28:48:25:18	0/1:-9.19204,0,-17.0919:92:PASS:162:173:128:1:5:2:5:3	0/1:-68.7566,0,-67.257:10000:PASS:614:924:602:2:11:10:22:23	0/0:0,-10.5256,-121.29:105:PASS:421:627:362:2:42:0:35:0	0/1:-42.6732,0,-36.2758:10000:PASS:332:625:300:2:5:1:12:15	0/1:-40.7744,0,-36.2771:10000:PASS:330:538:291:2:6:0:12:14	0/1:-66.0491,0,-89.4673:10000:PASS:684:1065:576:2:28:2:29:25	0/1:-39.1724,0,-48.1714:10000:PASS:414:572:314:2:17:1:16:13	0/1:-65.4471,0,-99.8468:10000:PASS:697:1020:590:2:15:0:32:23	0/0:0,-9.02141,-102.091:90:PASS:443:717:399:2:48:0:30:0	0/1:-51.3635,0,-57.7706:10000:PASS:463:801:486:2:21:2:20:19	0/1:-32.6803,0,-32.5777:10000:PASS:314:514:324:2:9:0:12:11	0/1:-13.5742,0,-70.2717:136:PASS:420:671:356:2:29:0:22:6	0/0:0,-8.12269,-94.3949:81:PASS:329:499:324:2:43:1:27:0	0/1:-107.533,0,-94.0447:10000:PASS:849:1512:831:2:37:4:32:37	0/1:-38.976,0,-47.3741:10000:PASS:346:612:347:2:20:1:16:14	0/1:-28.7788,0,-39.4778:10000:PASS:376:577:320:2:16:0:13:10	0/1:-48.6742,0,-28.7759:10000:PASS:384:635:297:2:8:0:10:16	0/1:-52.5673,0,-45.6697:10000:PASS:285:506:274:2:15:0:15:18	0/0:0,-6.01581,-69.4952:60:PASS:346:657:306:2:40:0:20:0	0/0:0,-10.2272,-120.792:102:PASS:395:700:383:2:51:0:34:0	0/0:0,-7.2148,-84.8901:72:PASS:347:615:359:2:45:0:24:0
Chr03	17656997	17661670	DEL00045620	4673	0.978814	0.0211864	0	0	PASS	PRECISE	DEL	60	-7,7	-7,7	TGTGCTACTTTCTATCCTATTAATCTTGCAGGTATGTGGGCTAATAGTCTGAAAGCTGATGATTATCAAGGTAAAGAAATTTCCTTTTCATATGCTACTTGGAACCATACTCTTTTTATCCTGCTTAAAAAGTGAGACACTGCATGGATATGGATATTGGAGACGAGCTGCTTCATTTTTGTACACATGGGTTAACGCTAT	0/0:0,-1.8058,-23.2996:18:PASS:71:79:81:1:14:0:6:0	0/0:0,-9.32284,-107.891:93:PASS:320:482:358:1:54:0:31:0	0/0:0,-10.5321,-127.596:105:PASS:310:467:416:1:65:0:35:0	0/0:0,-9.62796,-117.195:96:PASS:287:487:372:1:45:0:32:0	0/0:0,-1.50487,-19.4997:15:PASS:111:91:149:1:13:0:5:0	0/0:0,-9.92954,-116.996:99:PASS:224:423:279:2:36:0:33:0	0/0:0,-7.82343,-92.8966:78:PASS:230:426:285:2:31:0:26:0	0/0:0,-9.92967,-119.196:99:PASS:295:425:419:1:50:0:33:0	0/0:0,-12.9039,-148.16:129:PASS:413:610:452:1:61:0:43:0	0/0:0,-1.50487,-19.4997:15:PASS:83:74:136:1:13:0:5:0	0/0:0,-11.7304,-136.39:117:PASS:399:612:484:1:58:0:39:0	0/0:0,-12.3329,-144.591:123:PASS:417:494:518:1:62:0:41:0	0/0:0,-13.2402,-162.795:132:PASS:750:929:845:1:116:0:44:0	0/0:0,-1.50466,-18.5995:15:PASS:69:72:104:1:9:0:5:0	0/0:0,-12.0353,-143.294:120:PASS:349:437:496:1:70:0:40:0	0/0:0,-6.61853,-77.6959:66:PASS:263:308:288:1:35:0:22:0	0/0:0,-6.01811,-71.7975:60:PASS:236:251:254:1:36:0:20:0	0/0:0,-4.81241,-55.7959:48:PASS:201:265:218:1:33:0:16:0	0/0:0,-9.0262,-108.095:90:PASS:336:330:427:1:34:0:30:0	0/0:0,-6.31739,-73.5958:63:PASS:221:320:277:1:30:2:21:0	0/0:0,-8.42576,-101.597:84:PASS:301:369:236:1:39:0:28:0	0/0:0,-6.91595,-77.3923:69:PASS:291:362:329:1:51:0:23:0	0/0:0,-6.31936,-78.3977:63:PASS:207:274:215:1:28:0:21:0	0/0:0,-6.61977,-78.1971:66:PASS:229:239:228:1:34:0:22:0	0/0:0,-6.31983,-77.8982:63:PASS:243:261:321:1:32:0:21:0	0/0:0,-6.01339,-69.3928:60:PASS:198:239:218:1:34:0:20:0	0/0:0,-16.249,-195.893:10000:PASS:480:664:610:1:82:0:54:0	0/0:0,-6.31714,-73.7955:63:PASS:173:265:220:1:37:0:21:0	0/0:0,-6.30559,-70.484:63:PASS:183:256:215:1:30:0:21:0	0/0:0,-7.22174,-86.897:72:PASS:234:297:260:1:40:0:24:0	0/0:0,-4.21171,-49.4973:42:PASS:194:230:240:1:30:0:14:0	0/0:0,-7.81999,-91.4932:78:PASS:199:249:221:1:39:0:26:0	0/0:0,-7.21947,-84.5947:72:PASS:258:317:251:1:39:0:24:0	0/0:0,-6.31942,-77.2978:63:PASS:227:252:206:1:25:1:21:0
Chr03	19122559	19123071	DEL00046258	512	0.978814	0	0.0211864	0	PASS	PRECISE	DEL	60	-3,3	-3,3	TCCATGCACAAGTGGAGTCTTAAGTTCAAATTTTGTAAGATGATAGCAGACATCATAAGACATGTTAGAAAAATATATCATGAATTGTTTATCATTATTTTGGTAGGGTATGATAAATAGTGATACATATCATGCATATATACTTTAAGTTATTATTTTCCATATTAACGATGATAAAAAT	0/0:0,-2.10672,-26.6995:21:PASS:1:8:15:1:8:0:7:0	0/0:0,-9.28131,-110.249:93:PASS:4:46:25:3:26:0:31:0	0/0:0,-13.5389,-166.693:135:PASS:2:54:52:2:37:0:45:0	0/0:0,-10.2289,-121.994:102:PASS:3:42:38:2:27:0:34:0	0/0:0,-1.80584,-23.3997:18:PASS:0:22:14:3:14:0:6:0	0/0:0,-6.01797,-71.1974:60:PASS:9:31:27:2:16:0:20:0	0/0:0,-6.61901,-77.7964:66:PASS:6:29:25:2:14:0:22:0	0/0:0,-7.52323,-92.5975:75:PASS:4:47:23:3:22:0:25:0	0/0:0,-11.1343,-137.396:111:PASS:36:84:41:2:59:0:37:0	0/0:0,-3.00981,-39.4995:30:PASS:11:42:17:3:27:0:10:0	0/0:0,-10.2315,-126.896:102:PASS:4:53:45:2:31:0:34:0	0/0:0,-14.1421,-172.194:141:PASS:8:77:39:3:33:0:47:0	0/0:0,-5.11553,-63.498:51:PASS:8:63:36:3:40:0:17:0	0/0:0,-3.00951,-37.7992:30:PASS:0:14:21:1:14:0:10:0	0/0:0,-11.732,-138.292:117:PASS:4:79:55:3:46:0:39:0	0/0:0,-6.31672,-72.6951:63:PASS:19:69:23:3:44:0:21:0	0/0:0,-7.81951,-88.9927:78:PASS:25:53:27:2:40:0:26:0	0/0:0,-6.61917,-77.5965:66:PASS:14:57:26:3:43:0:22:0	0/0:0,-7.22047,-84.2957:72:PASS:11:54:24:3:23:0:24:0	0/0:0,-4.81347,-55.897:48:PASS:5:36:17:3:16:0:16:0	0/0:0,-8.07759,-88.7498:81:PASS:9:44:36:2:27:0:27:0	0/0:0,-6.61753,-76.3949:66:PASS:18:66:29:3:52:0:22:0	0/0:0,-6.31933,-77.8977:63:PASS:7:31:28:2:18:2:21:0	0/0:0,-7.81943,-89.6926:78:PASS:22:58:25:2:39:0:26:0	0/0:0,-11.7353,-140.895:117:PASS:22:95:42:3:62:0:39:0	0/0:0,-3.90883,-43.8954:39:PASS:9:40:12:4:32:0:13:0	0/0:0,-18.9557,-227.191:10000:PASS:14:106:75:2:55:0:63:0	0/0:0,-9.92518,-114.491:99:PASS:3:42:34:2:28:0:33:0	0/0:0,-9.02368,-103.893:90:PASS:6:37:39:2:28:0:30:0	0/0:0,-6.01326,-67.8927:60:PASS:16:52:18:3:36:0:20:0	0/0:0,-8.12169,-93.6939:81:PASS:3:44:32:3:22:0:27:0	0/0:0,-5.41429,-62.4958:54:PASS:19:39:16:2:32:0:18:0	1/1:-76.9933,-6.91696,0:69:PASS:13:0:19:0:1:19:0:23	0/0:0,-6.6189,-78.5962:66:PASS:22:54:22:2:36:0:22:0
Chr03	20640094	20640911	DUP00024948	817	0.995763	0.00423729	0	0	PASS	PRECISE	DUP	60	-7,7	-7,7	ACATATTCATGTCTTCTGAGCTCTAACATCGAGACAAGCGCCGTCCATGGTGGCACCGCACCTTATCCGGCTCCAGAATCCCAGCCACCCAATCACAACCCAGAGCTCCGTTGGAAGTAGAGGAAGATGAGTGTAAGAGAGAAAAAGAAGAATAAGTAAAAGAAAGGGTGGAGATAGAGGAGGAAGAAA	0/0:0,-1.50445,-17.5993:15:PASS:11:30:5:4:9:0:5:0	0/0:0,-14.1326,-155.184:141:PASS:79:119:61:2:68:0:47:0	0/0:0,-13.5373,-156.791:135:PASS:82:162:60:2:70:0:45:0	0/0:0,-13.7681,-147.321:138:PASS:71:128:48:2:56:0:46:0	0/0:0,-2.40565,-27.6974:24:PASS:23:43:12:2:15:0:8:0	0/0:0,-8.12488,-97.4971:81:PASS:61:77:36:2:35:0:27:0	0/0:0,-9.62805,-112.295:96:PASS:55:104:38:2:43:0:32:0	0/0:0,-10.779,-118.842:108:PASS:56:128:44:3:54:0:36:0	0/0:0,-12.1651,-136.023:122:PASS:99:137:54:2:58:0:41:0	0/0:0,-1.80474,-20.6986:18:PASS:20:36:11:2:11:0:6:0	0/0:0,-13.8227,-155.475:138:PASS:93:151:85:2:75:0:46:0	0/0:0,-12.4619,-137.219:125:PASS:100:171:58:2:67:0:42:0	0/0:0,-15.9333,-190.979:157:PASS:154:305:142:2:119:1:53:0	0/0:0,-1.50454,-17.8994:15:PASS:7:27:13:3:12:0:5:0	0/0:0,-12.8996,-140.455:129:PASS:85:158:49:2:60:0:43:0	0/0:0,-6.61861,-75.696:66:PASS:36:92:44:2:42:0:22:0	0/0:0,-7.21917,-83.1945:72:PASS:45:96:33:2:41:0:24:0	0/0:0,-7.82192,-89.4951:78:PASS:48:79:39:2:40:0:26:0	0/0:0,-11.4297,-131.391:114:PASS:133:150:49:2:46:0:38:0	0/0:0,-8.72034,-98.4905:87:PASS:43:89:31:2:42:0:29:0	0/0:0,-18.044,-204.882:10000:PASS:93:202:71:2:86:0:60:0	0/0:0,-8.7195,-97.5896:87:PASS:43:99:37:2:49:0:29:0	0/0:0,-9.62812,-113.395:96:PASS:77:102:53:2:56:0:32:0	0/0:0,-9.02429,-103.793:90:PASS:59:74:45:1:39:0:30:0	0/0:0,-6.91918,-80.0955:69:PASS:35:108:23:4:33:0:23:0	0/0:0,-5.1133,-57.9958:51:PASS:36:74:28:2:35:0:17:0	0/0:0,-19.8283,-233.36:10000:PASS:101:223:91:2:103:0:66:0	0/0:0,-6.31467,-70.993:63:PASS:52:100:36:2:37:0:21:0	0/0:0,-8.09875,-91.4709:81:PASS:35:86:36:2:41:0:27:0	0/0:0,-7.21655,-79.8918:72:PASS:42:98:34:3:37:0:24:0	0/0:0,-5.41444,-61.8959:54:PASS:36:71:30:2:32:0:18:0	0/0:0,-6.61838,-77.7957:66:PASS:35:81:33:2:30:0:22:0	0/0:0,-7.51705,-84.8913:75:PASS:37:85:34:2:38:0:25:0	0/0:0,-7.21233,-83.0876:72:PASS:54:65:38:1:37:0:24:0
[truncated: 280 more rows]
[truncated: 202 more columns]

## Sheet: Table S8
Table S8: Species used in OrthoFinder gene family analysis
PLAZA: https://bioinformatics.psb.ugent.be/plaza/versions/plaza_v4_monocots/
Species	NCBI taxid	Proteome source
Amborella_trichopoda	13333	PLAZA 4.0 monocots
Ananas_comosus	4615	PLAZA 4.0 monocots
Arabidopsis_thaliana	3702	PLAZA 4.0 monocots
Brachypodium_distachyon	15368	PLAZA 4.0 monocots
Elaeis_guineensis	51953	PLAZA 4.0 monocots
Hordeum_vulgare	4513	PLAZA 4.0 monocots
Musa_acuminata	4641	PLAZA 4.0 monocots
Oropetium_thomaeum	1148796	PLAZA 4.0 monocots
Oryza_brachyantha	4533	PLAZA 4.0 monocots
Oryza_sativa_indica	4530	PLAZA 4.0 monocots
Oryza_sativa_japonica	4530	PLAZA 4.0 monocots
Phalaenopsis_equestris	78828	PLAZA 4.0 monocots
Phyllostachys_edulis	38705	PLAZA 4.0 monocots
Physcomitrella_patens	3218	PLAZA 4.0 monocots
Populus_trichocarpa	3694	PLAZA 4.0 monocots
Selaginella_moellendorffii	88036	PLAZA 4.0 monocots
Setaria_italica	4555	Ensembl release 45
Setaria_viridis_A10	4556	Ensembl release 45
Setaria_viridis_ME034	4556	This analysis
Solanum_lycopersicum	4081	PLAZA 4.0 monocots
Sorghum_bicolor	4558	PLAZA 4.0 monocots
Spirodela_polyrhiza	29656	PLAZA 4.0 monocots
Triticum_aestivum	4565	PLAZA 4.0 monocots
Vitis_vinifera	29760	PLAZA 4.0 monocots
Zea_mays	4577	PLAZA 4.0 monocots
Zostera_marina	29655	PLAZA 4.0 monocots
Zoysia_japonica_nagirizaki	309978	PLAZA 4.0 monocots

## Sheet: Table S9
Table S9: OrthoFinder gene counts per orthogroup
	Amborella_trichopoda	Ananas_comosus	Arabidopsis_thaliana	Brachypodium_distachyon	Elaeis_guineensis	Hordeum_vulgare	Musa_acuminata	Oropetium_thomaeum	Oryza_brachyantha	Oryza_sativa_indica	Oryza_sativa_japonica	Phalaenopsis_equestris	Phyllostachys_edulis	Physcomitrella_patens	Populus_trichocarpa	Selaginella_moellendorffii	Setaria_italica	Setaria_viridis_A10	Setaria_viridis_ME034	Solanum_lycopersicum	Sorghum_bicolor	Spirodela_polyrhiza	Triticum_aestivum	Vitis_vinifera	Zea_mays	Zostera_marina	Zoysia_japonica_nagirizaki	Total sequences	Total species count
OG0000079	0	0	1	4	15	24	6	0	18	66	12	1	3	0	1	0	2	4	162	23	2	6	53	4	19	13	2	441	22
OG0000035	1	25	1	68	0	127	1	0	9	32	8	0	0	0	7	0	14	17	133	8	0	0	132	2	4	1	1	591	19
OG0000000	57	73	108	106	119	68	199	68	86	90	116	94	109	65	162	39	148	144	131	126	135	59	350	68	174	75	179	3148	27
[truncated: 29,224 more rows]

## Sheet: Table S10
Table S10: OrthoFinder predicted duplications
[truncated: 57 more rows]

[truncated: 2 more sheets: Table S11, Table S12]
